# Supplementary material for: Comparing cestode infections and their consequences for host fitness in two sexual branchiopods: alien Artemia franciscana and native A. salina from syntopic-populations
Source: PeerJ. 2015 Jul 2;3:e1073. doi: 10.7717/peerj.1073 (PMC4493677; doi:10.7717/peerj.1073)
Supplement: Supplemental Information 2 — Raw data used for the analyses of parasite colour effects in both Artemia spp. including all samples available from Ebro delta salterns. [file peerj-03-1073-s007.xlsx]

## Sheet: AD-AF SPSS
#	SITE	month	year	specie	FL	FF	WS	BG	FT	EA	AT	AM	GS	GSP	all/M	SR	SR inf	sex	stage	colour2	colour	colour	PRESENCE
1	1	6	2007	1	0	0	0	0	0	1	0	0	0	0	1	1	1	1	1	0	0	NO RED	1
2	1	6	2007	1	0	0	0	0	0	1	0	0	0	0	1	1	1	1	1	0	0	NO RED	1
3	1	6	2007	1	0	0	0	0	0	2	0	0	0	0	2	1	1	1	1	1	2	RED	1
4	1	6	2007	1	0	0	0	0	0	0	1	0	0	0	1	1	1	1	1	0	0	NO RED	1
5	1	6	2007	1	0	0	0	0	0	1	0	0	0	0	1	1	1	1	1	0	0	NO RED	1
6	1	6	2007	1	0	0	0	0	0	1	0	0	0	0	1	1	1	1	1	0	0	NO RED	1
7	1	6	2007	1	0	0	1	0	0	1	0	0	0	0	2	2	2	1	1	1	2	RED	1
8	1	6	2007	1	0	0	0	0	0	1	0	0	0	0	1	1	1	1	1	0	0	NO RED	1
9	1	6	2007	1	0	0	0	0	0	1	0	0	0	0	1	1	1	1	1	0	0	NO RED	1
10	1	6	2007	1	0	0	0	0	0	0	0	0	1	0	1	1	1	1	1	0	0	NO RED	1
11	1	6	2007	1	0	1	0	0	0	0	0	0	0	0	1	1	1	2	1	0	0	NO RED	1
12	1	6	2007	1	0	0	0	0	0	1	0	0	0	0	1	1	1	2	1	0	0	NO RED	1
13	1	6	2007	1	0	0	0	0	0	1	0	0	0	0	1	1	1	2	1	0	0	NO RED	1
14	1	6	2007	1	0	0	0	0	0	1	0	0	0	0	1	1	1	2	1	0	0	NO RED	1
15	1	6	2007	1	0	0	0	0	0	1	0	0	0	0	1	1	1	2	1	0	0	NO RED	1
16	1	6	2007	1	1	0	0	0	0	0	0	0	0	0	1	1	1	2	1	0	0	NO RED	1
17	1	6	2007	1	0	0	0	0	0	0	0	1	0	0	1	1	1	2	1	0	0	NO RED	1
18	1	6	2007	1	0	0	0	0	0	0	0	1	0	0	1	1	1	2	1	0	0	NO RED	1
19	1	6	2007	1	0	0	0	0	0	1	0	0	0	0	1	1	1	2	1	1	2	RED	1
20	1	6	2007	1	0	0	0	0	0	1	0	0	0	0	1	1	1	2	1	0	0	NO RED	1
21	1	6	2007	1	1	0	0	0	0	0	0	0	0	0	1	1	1	2	1	0	0	NO RED	1
22	1	6	2007	1	0	0	0	0	0	1	0	0	0	0	1	1	1	2	1	0	0	NO RED	1
23	1	6	2007	1	1	0	0	0	0	1	0	0	0	0	2	2	2	2	1	0	0	NO RED	1
24	1	6	2007	1	0	0	0	0	0	1	0	0	0	0	1	1	1	2	1	0	0	NO RED	1
25	1	6	2007	1	0	0	0	0	0	0	0	0	0	0	0	0		1	1	0	0	NO RED	0
26	1	6	2007	1	0	0	0	0	0	0	0	0	0	0	0	0		1	1	0	0	NO RED	0
27	1	6	2007	1	0	0	0	0	0	0	0	0	0	0	0	0		1	1	0	0	NO RED	0
28	1	6	2007	1	0	0	0	0	0	0	0	0	0	0	0	0		1	1	0	0	NO RED	0
29	1	6	2007	1	0	0	0	0	0	0	0	0	0	0	0	0		1	1	0	0	NO RED	0
30	1	6	2007	1	0	0	0	0	0	0	0	0	0	0	0	0		1	1	0	0	NO RED	0
31	1	6	2007	1	0	0	0	0	0	0	0	0	0	0	0	0		1	1	0	0	NO RED	0
32	1	6	2007	1	0	0	0	0	0	0	0	0	0	0	0	0		1	1	0	0	NO RED	0
33	1	6	2007	1	0	0	0	0	0	0	0	0	0	0	0	0		1	1	0	0	NO RED	0
34	1	6	2007	1	0	0	0	0	0	0	0	0	0	0	0	0		1	1	0	0	NO RED	0
35	1	6	2007	1	0	0	0	0	0	0	0	0	0	0	0	0		1	1	0	0	NO RED	0
36	1	6	2007	1	0	0	0	0	0	0	0	0	0	0	0	0		1	1	0	0	NO RED	0
37	1	6	2007	1	0	0	0	0	0	0	0	0	0	0	0	0		1	1	0	0	NO RED	0
38	1	6	2007	1	0	0	0	0	0	0	0	0	0	0	0	0		1	1	0	0	NO RED	0
39	1	6	2007	1	0	0	0	0	0	0	0	0	0	0	0	0		1	1	0	0	NO RED	0
40	1	6	2007	1	0	0	0	0	0	0	0	0	0	0	0	0		1	1	0	0	NO RED	0
41	1	6	2007	1	0	0	0	0	0	0	0	0	0	0	0	0		1	1	0	0	NO RED	0
42	1	6	2007	1	0	0	0	0	0	0	0	0	0	0	0	0		1	1	0	0	NO RED	0
43	1	6	2007	1	0	0	0	0	0	0	0	0	0	0	0	0		1	1	0	0	NO RED	0
44	1	6	2007	1	0	0	0	0	0	0	0	0	0	0	0	0		1	1	0	0	NO RED	0
45	1	6	2007	1	0	0	0	0	0	0	0	0	0	0	0	0		1	1	0	0	NO RED	0
46	1	6	2007	1	0	0	0	0	0	0	0	0	0	0	0	0		1	1	0	0	NO RED	0
47	1	6	2007	1	0	0	0	0	0	0	0	0	0	0	0	0		1	1	0	0	NO RED	0
48	1	6	2007	1	0	0	0	0	0	0	0	0	0	0	0	0		1	1	0	0	NO RED	0
49	1	6	2007	1	0	0	0	0	0	0	0	0	0	0	0	0		1	1	0	0	NO RED	0
50	1	6	2007	1	0	0	0	0	0	0	0	0	0	0	0	0		1	1	0	0	NO RED	0
51	1	6	2007	1	0	0	0	0	0	0	0	0	0	0	0	0		1	1	0	0	NO RED	0
52	1	6	2007	1	0	0	0	0	0	0	0	0	0	0	0	0		1	1	0	0	NO RED	0
53	1	6	2007	1	0	0	0	0	0	0	0	0	0	0	0	0		1	1	0	0	NO RED	0
54	1	6	2007	1	0	0	0	0	0	0	0	0	0	0	0	0		1	1	0	0	NO RED	0
55	1	6	2007	1	0	0	0	0	0	0	0	0	0	0	0	0		1	1	0	0	NO RED	0
56	1	6	2007	1	0	0	0	0	0	0	0	0	0	0	0	0		1	1	0	0	NO RED	0
57	1	6	2007	1	0	0	0	0	0	0	0	0	0	0	0	0		1	1	0	0	NO RED	0
58	1	6	2007	1	0	0	0	0	0	0	0	0	0	0	0	0		1	1	0	0	NO RED	0
59	1	6	2007	1	0	0	0	0	0	0	0	0	0	0	0	0		1	1	0	0	NO RED	0
60	1	6	2007	1	0	0	0	0	0	0	0	0	0	0	0	0		1	1	0	0	NO RED	0
61	1	6	2007	1	0	0	0	0	0	0	0	0	0	0	0	0		1	1	0	0	NO RED	0
62	1	6	2007	1	0	0	0	0	0	0	0	0	0	0	0	0		1	1	0	0	NO RED	0
63	1	6	2007	1	0	0	0	0	0	0	0	0	0	0	0	0		1	1	0	0	NO RED	0
64	1	6	2007	1	0	0	0	0	0	0	0	0	0	0	0	0		1	1	0	0	NO RED	0
65	1	6	2007	1	0	0	0	0	0	0	0	0	0	0	0	0		1	1	0	0	NO RED	0
66	1	6	2007	1	0	0	0	0	0	0	0	0	0	0	0	0		1	1	0	0	NO RED	0
67	1	6	2007	1	0	0	0	0	0	0	0	0	0	0	0	0		1	1	0	0	NO RED	0
68	1	6	2007	1	0	0	0	0	0	0	0	0	0	0	0	0		1	1	0	0	NO RED	0
69	1	6	2007	1	0	0	0	0	0	0	0	0	0	0	0	0		1	1	0	0	NO RED	0
70	1	6	2007	1	0	0	0	0	0	0	0	0	0	0	0	0		1	1	0	0	NO RED	0
71	1	6	2007	1	0	0	0	0	0	0	0	0	0	0	0	0		1	1	0	0	NO RED	0
72	1	6	2007	1	0	0	0	0	0	0	0	0	0	0	0	0		1	1	0	0	NO RED	0
73	1	6	2007	1	0	0	0	0	0	0	0	0	0	0	0	0		1	1	0	0	NO RED	0
74	1	6	2007	1	0	0	0	0	0	0	0	0	0	0	0	0		1	1	0	0	NO RED	0
75	1	6	2007	1	0	0	0	0	0	0	0	0	0	0	0	0		1	1	0	0	NO RED	0
76	1	6	2007	1	0	0	0	0	0	0	0	0	0	0	0	0		1	1	0	0	NO RED	0
77	1	6	2007	1	0	0	0	0	0	0	0	0	0	0	0	0		1	1	0	0	NO RED	0
78	1	6	2007	1	0	0	0	0	0	0	0	0	0	0	0	0		1	1	0	0	NO RED	0
79	1	6	2007	1	0	0	0	0	0	0	0	0	0	0	0	0		1	1	0	0	NO RED	0
80	1	6	2007	1	0	0	0	0	0	0	0	0	0	0	0	0		1	1	0	0	NO RED	0
81	1	6	2007	1	0	0	0	0	0	0	0	0	0	0	0	0		1	1	0	0	NO RED	0
82	1	6	2007	1	0	0	0	0	0	0	0	0	0	0	0	0		1	1	0	0	NO RED	0
83	1	6	2007	1	0	0	0	0	0	0	0	0	0	0	0	0		1	1	0	0	NO RED	0
84	1	6	2007	1	0	0	0	0	0	0	0	0	0	0	0	0		1	1	0	0	NO RED	0
85	1	6	2007	1	0	0	0	0	0	0	0	0	0	0	0	0		1	1	0	0	NO RED	0
86	1	6	2007	1	0	0	0	0	0	0	0	0	0	0	0	0		1	1	0	0	NO RED	0
87	1	6	2007	1	0	0	0	0	0	0	0	0	0	0	0	0		1	1	0	0	NO RED	0
88	1	6	2007	1	0	0	0	0	0	0	0	0	0	0	0	0		1	1	0	0	NO RED	0
89	1	6	2007	1	0	0	0	0	0	0	0	0	0	0	0	0		1	1	0	0	NO RED	0
90	1	6	2007	1	0	0	0	0	0	0	0	0	0	0	0	0		1	1	0	0	NO RED	0
91	1	6	2007	1	0	0	0	0	0	0	0	0	0	0	0	0		1	1	0	0	NO RED	0
92	1	6	2007	1	0	0	0	0	0	0	0	0	0	0	0	0		1	1	0	0	NO RED	0
93	1	6	2007	1	0	0	0	0	0	0	0	0	0	0	0	0		1	1	0	0	NO RED	0
94	1	6	2007	1	0	0	0	0	0	0	0	0	0	0	0	0		1	1	0	0	NO RED	0
95	1	6	2007	1	0	0	0	0	0	0	0	0	0	0	0	0		1	1	0	0	NO RED	0
96	1	6	2007	1	0	0	0	0	0	0	0	0	0	0	0	0		1	1	0	0	NO RED	0
97	1	6	2007	1	0	0	0	0	0	0	0	0	0	0	0	0		1	1	0	0	NO RED	0
98	1	6	2007	1	0	0	0	0	0	0	0	0	0	0	0	0		1	1	0	0	NO RED	0
99	1	6	2007	1	0	0	0	0	0	0	0	0	0	0	0	0		1	1	0	0	NO RED	0
100	1	6	2007	1	0	0	0	0	0	0	0	0	0	0	0	0		1	1	0	0	NO RED	0
101	1	6	2007	1	0	0	0	0	0	0	0	0	0	0	0	0		1	1	0	0	NO RED	0
102	1	6	2007	1	0	0	0	0	0	0	0	0	0	0	0	0		1	1	0	0	NO RED	0
103	1	6	2007	1	0	0	0	0	0	0	0	0	0	0	0	0		1	1	0	0	NO RED	0
104	1	6	2007	1	0	0	0	0	0	0	0	0	0	0	0	0		1	1	0	0	NO RED	0
105	1	6	2007	1	0	0	0	0	0	0	0	0	0	0	0	0		1	1	0	0	NO RED	0
106	1	6	2007	1	0	0	0	0	0	0	0	0	0	0	0	0		1	1	0	0	NO RED	0
107	1	6	2007	1	0	0	0	0	0	0	0	0	0	0	0	0		1	1	0	0	NO RED	0
108	1	6	2007	1	0	0	0	0	0	0	0	0	0	0	0	0		1	1	0	0	NO RED	0
109	1	6	2007	1	0	0	0	0	0	0	0	0	0	0	0	0		1	1	0	0	NO RED	0
110	1	6	2007	1	0	0	0	0	0	0	0	0	0	0	0	0		1	1	0	0	NO RED	0
111	1	6	2007	1	0	0	0	0	0	0	0	0	0	0	0	0		1	1	0	0	NO RED	0
112	1	6	2007	1	0	0	0	0	0	0	0	0	0	0	0	0		1	1	0	0	NO RED	0
113	1	6	2007	1	0	0	0	0	0	0	0	0	0	0	0	0		1	1	0	0	NO RED	0
114	1	6	2007	1	0	0	0	0	0	0	0	0	0	0	0	0		1	1	0	0	NO RED	0
115	1	6	2007	1	0	0	0	0	0	0	0	0	0	0	0	0		1	1	0	0	NO RED	0
116	1	6	2007	1	0	0	0	0	0	0	0	0	0	0	0	0		1	1	0	0	NO RED	0
117	1	6	2007	1	0	0	0	0	0	0	0	0	0	0	0	0		1	1	0	0	NO RED	0
118	1	6	2007	1	0	0	0	0	0	0	0	0	0	0	0	0		1	1	0	0	NO RED	0
119	1	6	2007	1	0	0	0	0	0	0	0	0	0	0	0	0		1	1	0	0	NO RED	0
120	1	6	2007	1	0	0	0	0	0	0	0	0	0	0	0	0		1	1	0	0	NO RED	0
121	1	6	2007	1	0	0	0	0	0	0	0	0	0	0	0	0		1	1	0	0	NO RED	0
122	1	6	2007	1	0	0	0	0	0	0	0	0	0	0	0	0		1	1	0	0	NO RED	0
123	1	6	2007	1	0	0	0	0	0	0	0	0	0	0	0	0		1	1	0	0	NO RED	0
124	1	6	2007	1	0	0	0	0	0	0	0	0	0	0	0	0		1	1	0	0	NO RED	0
125	1	6	2007	1	0	0	0	0	0	0	0	0	0	0	0	0		1	1	0	0	NO RED	0
126	1	6	2007	1	0	0	0	0	0	0	0	0	0	0	0	0		1	1	0	0	NO RED	0
127	1	6	2007	1	0	0	0	0	0	0	0	0	0	0	0	0		1	1	0	0	NO RED	0
128	1	6	2007	1	0	0	0	0	0	0	0	0	0	0	0	0		1	1	0	0	NO RED	0
129	1	6	2007	1	0	0	0	0	0	0	0	0	0	0	0	0		1	1	0	0	NO RED	0
130	1	6	2007	1	0	0	0	0	0	0	0	0	0	0	0	0		1	1	0	0	NO RED	0
131	1	6	2007	1	0	0	0	0	0	0	0	0	0	0	0	0		1	1	0	0	NO RED	0
132	1	6	2007	1	0	0	0	0	0	0	0	0	0	0	0	0		1	1	0	0	NO RED	0
133	1	6	2007	1	0	0	0	0	0	0	0	0	0	0	0	0		1	1	0	0	NO RED	0
134	1	6	2007	1	0	0	0	0	0	0	0	0	0	0	0	0		1	1	0	0	NO RED	0
135	1	6	2007	1	0	0	0	0	0	0	0	0	0	0	0	0		1	1	0	0	NO RED	0
136	1	6	2007	1	0	0	0	0	0	0	0	0	0	0	0	0		1	1	0	0	NO RED	0
137	1	6	2007	1	0	0	0	0	0	0	0	0	0	0	0	0		1	1	0	0	NO RED	0
138	1	6	2007	1	0	0	0	0	0	0	0	0	0	0	0	0		1	1	0	0	NO RED	0
139	1	6	2007	1	0	0	0	0	0	0	0	0	0	0	0	0		1	1	0	0	NO RED	0
140	1	6	2007	1	0	0	0	0	0	0	0	0	0	0	0	0		1	1	0	0	NO RED	0
141	1	6	2007	1	0	0	0	0	0	0	0	0	0	0	0	0		1	1	0	0	NO RED	0
142	1	6	2007	1	0	0	0	0	0	0	0	0	0	0	0	0		1	1	0	0	NO RED	0
143	1	6	2007	1	0	0	0	0	0	0	0	0	0	0	0	0		2	1	0	0	NO RED	0
144	1	6	2007	1	0	0	0	0	0	0	0	0	0	0	0	0		2	1	0	0	NO RED	0
145	1	6	2007	1	0	0	0	0	0	0	0	0	0	0	0	0		2	1	0	0	NO RED	0
146	1	6	2007	1	0	0	0	0	0	0	0	0	0	0	0	0		2	1	0	0	NO RED	0
147	1	6	2007	1	0	0	0	0	0	0	0	0	0	0	0	0		2	1	0	0	NO RED	0
148	1	6	2007	1	0	0	0	0	0	0	0	0	0	0	0	0		2	1	0	0	NO RED	0
149	1	6	2007	1	0	0	0	0	0	0	0	0	0	0	0	0		2	1	0	0	NO RED	0
150	1	6	2007	1	0	0	0	0	0	0	0	0	0	0	0	0		2	1	0	0	NO RED	0
151	1	6	2007	1	0	0	0	0	0	0	0	0	0	0	0	0		2	1	0	0	NO RED	0
152	1	6	2007	1	0	0	0	0	0	0	0	0	0	0	0	0		2	1	0	0	NO RED	0
153	1	6	2007	1	0	0	0	0	0	0	0	0	0	0	0	0		2	1	0	0	NO RED	0
154	1	6	2007	1	0	0	0	0	0	0	0	0	0	0	0	0		2	1	0	0	NO RED	0
155	1	6	2007	1	0	0	0	0	0	0	0	0	0	0	0	0		2	1	0	0	NO RED	0
156	1	6	2007	1	0	0	0	0	0	0	0	0	0	0	0	0		2	1	0	0	NO RED	0
157	1	6	2007	1	0	0	0	0	0	0	0	0	0	0	0	0		2	1	0	0	NO RED	0
158	1	6	2007	1	0	0	0	0	0	0	0	0	0	0	0	0		2	1	0	0	NO RED	0
159	1	6	2007	1	0	0	0	0	0	0	0	0	0	0	0	0		2	1	0	0	NO RED	0
160	1	6	2007	1	0	0	0	0	0	0	0	0	0	0	0	0		2	1	0	0	NO RED	0
161	1	6	2007	1	0	0	0	0	0	0	0	0	0	0	0	0		2	1	0	0	NO RED	0
162	1	6	2007	1	0	0	0	0	0	0	0	0	0	0	0	0		2	1	0	0	NO RED	0
163	1	6	2007	1	0	0	0	0	0	0	0	0	0	0	0	0		2	1	0	0	NO RED	0
164	1	6	2007	1	0	0	0	0	0	0	0	0	0	0	0	0		2	1	0	0	NO RED	0
165	1	6	2007	1	0	0	0	0	0	0	0	0	0	0	0	0		2	1	0	0	NO RED	0
166	1	6	2007	1	0	0	0	0	0	0	0	0	0	0	0	0		2	1	0	0	NO RED	0
167	1	6	2007	1	0	0	0	0	0	0	0	0	0	0	0	0		2	1	0	0	NO RED	0
168	1	6	2007	1	0	0	0	0	0	0	0	0	0	0	0	0		2	1	0	0	NO RED	0
169	1	6	2007	1	0	0	0	0	0	0	0	0	0	0	0	0		2	1	0	0	NO RED	0
170	1	6	2007	1	0	0	0	0	0	0	0	0	0	0	0	0		2	1	0	0	NO RED	0
171	1	6	2007	1	0	0	0	0	0	0	0	0	0	0	0	0		2	1	0	0	NO RED	0
172	1	6	2007	1	0	0	0	0	0	0	0	0	0	0	0	0		2	1	0	0	NO RED	0
173	1	6	2007	1	0	0	0	0	0	0	0	0	0	0	0	0		2	1	0	0	NO RED	0
174	1	6	2007	1	0	0	0	0	0	0	0	0	0	0	0	0		2	1	0	0	NO RED	0
175	1	6	2007	1	0	0	0	0	0	0	0	0	0	0	0	0		2	1	0	0	NO RED	0
176	1	6	2007	1	0	0	0	0	0	0	0	0	0	0	0	0		2	1	0	0	NO RED	0
177	1	6	2007	1	0	0	0	0	0	0	0	0	0	0	0	0		2	1	0	0	NO RED	0
178	1	6	2007	1	0	0	0	0	0	0	0	0	0	0	0	0		2	1	0	0	NO RED	0
179	1	6	2007	1	0	0	0	0	0	0	0	0	0	0	0	0		2	1	0	0	NO RED	0
180	1	6	2007	1	0	0	0	0	0	0	0	0	0	0	0	0		2	1	0	0	NO RED	0
181	1	6	2007	1	0	0	0	0	0	0	0	0	0	0	0	0		2	1	0	0	NO RED	0
182	1	6	2007	1	0	0	0	0	0	0	0	0	0	0	0	0		2	1	0	0	NO RED	0
183	1	6	2007	1	0	0	0	0	0	0	0	0	0	0	0	0		2	1	0	0	NO RED	0
184	1	6	2007	1	0	0	0	0	0	0	0	0	0	0	0	0		2	1	0	0	NO RED	0
185	1	6	2007	1	0	0	0	0	0	0	0	0	0	0	0	0		2	1	0	0	NO RED	0
186	1	6	2007	1	0	0	0	0	0	0	0	0	0	0	0	0		2	1	0	0	NO RED	0
187	1	6	2007	1	0	0	0	0	0	0	0	0	0	0	0	0		2	1	0	0	NO RED	0
188	1	6	2007	1	0	0	0	0	0	0	0	0	0	0	0	0		2	1	0	0	NO RED	0
189	1	6	2007	1	0	0	0	0	0	0	0	0	0	0	0	0		2	1	0	0	NO RED	0
190	1	6	2007	1	0	0	0	0	0	0	0	0	0	0	0	0		2	1	0	0	NO RED	0
191	1	6	2007	1	0	0	0	0	0	0	0	0	0	0	0	0		2	1	0	0	NO RED	0
192	1	6	2007	1	0	0	0	0	0	0	0	0	0	0	0	0		2	1	0	0	NO RED	0
193	1	6	2007	1	0	0	0	0	0	0	0	0	0	0	0	0		2	1	0	0	NO RED	0
194	1	6	2007	1	0	0	0	0	0	0	0	0	0	0	0	0		2	1	0	0	NO RED	0
195	1	6	2007	1	0	0	0	0	0	0	0	0	0	0	0	0		2	1	0	0	NO RED	0
196	1	6	2007	1	0	0	0	0	0	0	0	0	0	0	0	0		2	1	0	0	NO RED	0
197	1	6	2007	1	0	0	0	0	0	0	0	0	0	0	0	0		2	1	0	0	NO RED	0
198	1	6	2007	1	0	0	0	0	0	0	0	0	0	0	0	0		2	1	0	0	NO RED	0
199	1	6	2007	1	0	0	0	0	0	0	0	0	0	0	0	0		2	1	0	0	NO RED	0
200	1	6	2007	1	0	0	0	0	0	0	0	0	0	0	0	0		2	1	0	0	NO RED	0
201	1	6	2007	1	0	0	0	0	0	0	0	0	0	0	0	0		2	1	0	0	NO RED	0
202	1	6	2007	1	0	0	0	0	0	0	0	0	0	0	0	0		2	1	0	0	NO RED	0
203	1	6	2007	1	0	0	0	0	0	0	0	0	0	0	0	0		2	1	0	0	NO RED	0
204	1	6	2007	1	0	0	0	0	0	0	0	0	0	0	0	0		2	1	0	0	NO RED	0
205	1	6	2007	1	0	0	0	0	0	0	0	0	0	0	0	0		2	1	0	0	NO RED	0
206	1	6	2007	1	0	0	0	0	0	0	0	0	0	0	0	0		2	1	0	0	NO RED	0
207	1	6	2007	1	0	0	0	0	0	0	0	0	0	0	0	0		2	1	0	0	NO RED	0
208	1	6	2007	1	0	0	0	0	0	0	0	0	0	0	0	0		2	1	0	0	NO RED	0
209	1	6	2007	1	0	0	0	0	0	0	0	0	0	0	0	0		2	1	0	0	NO RED	0
210	1	6	2007	1	0	0	0	0	0	0	0	0	0	0	0	0		2	1	0	0	NO RED	0
211	1	6	2007	1	0	0	0	0	0	0	0	0	0	0	0	0		2	1	0	0	NO RED	0
212	1	6	2007	1	0	0	0	0	0	0	0	0	0	0	0	0		2	1	0	0	NO RED	0
213	1	6	2007	1	0	0	0	0	0	0	0	0	0	0	0	0		2	1	0	0	NO RED	0
214	1	6	2007	1	0	0	0	0	0	0	0	0	0	0	0	0		2	1	0	0	NO RED	0
215	1	6	2007	1	0	0	0	0	0	0	0	0	0	0	0	0		2	1	0	0	NO RED	0
216	1	6	2007	1	0	0	0	0	0	0	0	0	0	0	0	0		2	1	0	0	NO RED	0
217	1	6	2007	1	0	0	0	0	0	0	0	0	0	0	0	0		2	1	0	0	NO RED	0
218	1	6	2007	1	0	0	0	0	0	0	0	0	0	0	0	0		2	1	0	0	NO RED	0
219	1	6	2007	1	0	0	0	0	0	0	0	0	0	0	0	0		2	1	0	0	NO RED	0
220	1	6	2007	1	0	0	0	0	0	0	0	0	0	0	0	0		2	1	0	0	NO RED	0
221	1	6	2007	1	0	0	0	0	0	0	0	0	0	0	0	0		2	1	0	0	NO RED	0
222	1	6	2007	1	0	0	0	0	0	0	0	0	0	0	0	0		2	1	0	0	NO RED	0
223	1	6	2007	1	0	0	0	0	0	0	0	0	0	0	0	0		2	1	0	0	NO RED	0
224	1	6	2007	1	0	0	0	0	0	0	0	0	0	0	0	0		2	1	0	0	NO RED	0
225	1	6	2007	1	0	0	0	0	0	0	0	0	0	0	0	0		2	1	0	0	NO RED	0
226	1	6	2007	1	0	0	0	0	0	0	0	0	0	0	0	0		2	1	0	0	NO RED	0
227	1	6	2007	1	0	0	0	0	0	0	0	0	0	0	0	0		2	1	0	0	NO RED	0
228	1	6	2007	1	0	0	0	0	0	0	0	0	0	0	0	0		2	1	0	0	NO RED	0
229	1	6	2007	1	0	0	0	0	0	0	0	0	0	0	0	0		2	1	0	0	NO RED	0
230	1	6	2007	1	0	0	0	0	0	0	0	0	0	0	0	0		2	1	0	0	NO RED	0
231	1	6	2007	1	0	0	0	0	0	0	0	0	0	0	0	0		2	1	0	0	NO RED	0
232	1	6	2007	1	0	0	0	0	0	0	0	0	0	0	0	0		2	1	0	0	NO RED	0
233	1	7	2007	1	0	0	0	0	0	1	0	0	0	0	1	1	1	2	1	0	0	NO RED	1
234	1	7	2007	1	0	0	0	0	0	1	0	0	0	0	1	1	1	2	1	0	0	NO RED	1
235	1	7	2007	1	0	0	1	0	0	1	0	0	0	0	2	2	2	2	1	1	2	RED	1
236	1	7	2007	1	0	0	0	0	0	0	0	1	0	0	1	1	1	2	1	0	0	NO RED	1
237	1	7	2007	1	0	0	0	0	0	3	0	0	0	0	3	1	1	2	1	1	2	RED	1
238	1	7	2007	1	0	0	0	0	0	1	0	0	0	0	1	1	1	1	1	0	0	NO RED	1
239	1	7	2007	1	0	0	1	0	0	1	0	0	0	0	2	2	2	2	1	0	0	NO RED	1
240	1	7	2007	1	0	0	0	0	0	3	0	0	0	0	3	1	1	1	1	0	0	NO RED	1
241	1	7	2007	1	0	0	0	0	0	0	0	1	0	0	1	1	1	2	1	0	0	NO RED	1
242	1	7	2007	1	0	0	0	0	0	3	0	0	0	0	3	1	1	2	1	0	0	NO RED	1
243	1	7	2007	1	0	0	0	0	0	3	0	0	0	0	3	1	1	2	1	1	2	RED	1
244	1	7	2007	1	0	0	0	0	0	4	0	0	0	0	4	1	1	2	1	1	2	RED	1
245	1	7	2007	1	0	0	0	0	0	2	0	0	0	0	2	1	1	2	1	1	2	RED	1
246	1	7	2007	1	0	0	0	0	0	1	0	0	0	0	1	1	1	2	1	0	0	NO RED	1
247	1	7	2007	1	0	0	0	0	0	1	0	0	0	0	1	1	1	2	1	0	0	NO RED	1
248	1	7	2007	1	0	0	0	0	0	1	0	0	0	0	1	1	1	1	1	0	0	NO RED	1
249	1	7	2007	1	0	0	0	0	0	1	0	0	0	0	1	1	1	2	1	0	0	NO RED	1
250	1	7	2007	1	0	0	0	0	0	1	0	0	0	0	1	1	1	2	1	0	0	NO RED	1
251	1	7	2007	1	0	0	0	0	0	2	0	0	0	0	2	1	1	2	1	1	2	RED	1
252	1	7	2007	1	0	0	0	0	0	0	1	0	0	0	1	1	1	2	1	0	0	NO RED	1
253	1	7	2007	1	0	0	0	0	0	2	0	0	0	0	2	1	1	2	1	0	0	NO RED	1
254	1	7	2007	1	0	0	0	0	0	1	0	0	0	0	1	1	1	2	1	0	0	NO RED	1
255	1	7	2007	1	0	0	0	0	0	1	0	0	0	0	1	1	1	2	1	0	0	NO RED	1
256	1	7	2007	1	0	0	0	0	0	1	0	0	0	0	1	1	1	1	1	0	0	NO RED	1
257	1	7	2007	1	0	0	0	0	0	1	0	0	0	0	1	1	1	2	1	0	0	NO RED	1
258	1	7	2007	1	0	0	0	0	0	1	0	0	0	0	1	1	1	2	1	0	0	NO RED	1
259	1	7	2007	1	0	0	0	0	0	2	0	0	0	0	2	1	1	1	1	0	0	NO RED	1
260	1	7	2007	1	0	0	0	0	0	1	0	0	0	0	1	1	1	2	1	0	0	NO RED	1
261	1	7	2007	1	0	0	0	0	0	0	0	1	0	0	1	1	1	2	1	0	0	NO RED	1
262	1	7	2007	1	0	0	0	0	0	1	0	0	0	0	1	1	1	2	1	0	0	NO RED	1
263	1	7	2007	1	0	0	0	0	0	1	0	0	0	0	1	1	1	2	1	0	0	NO RED	1
264	1	7	2007	1	0	0	0	0	0	1	0	0	0	0	1	1	1	2	1	0	0	NO RED	1
265	1	7	2007	1	0	0	0	0	0	1	0	0	0	0	1	1	1	2	1	0	0	NO RED	1
266	1	7	2007	1	0	0	0	0	0	1	0	0	0	0	1	1	1	2	1	0	0	NO RED	1
267	1	7	2007	1	0	0	0	0	0	1	0	0	0	0	1	1	1	2	1	0	0	NO RED	1
268	1	7	2007	1	0	0	0	0	0	5	0	0	0	0	5	1	1	2	1	1	2	RED	1
269	1	7	2007	1	0	0	0	0	0	1	0	0	0	0	1	1	1	2	1	0	0	NO RED	1
270	1	7	2007	1	0	0	0	0	0	1	0	0	0	0	1	1	1	2	1	0	0	NO RED	1
271	1	7	2007	1	0	0	0	0	0	0	1	0	0	0	1	1	1	2	1	0	0	NO RED	1
272	1	7	2007	1	0	0	0	0	0	1	0	0	0	0	1	1	1	2	1	0	0	NO RED	1
273	1	7	2007	1	0	1	0	0	0	1	0	0	0	0	2	2	2	2	1	0	0	NO RED	1
274	1	7	2007	1	0	0	0	0	0	1	0	0	0	0	1	1	1	2	1	0	0	NO RED	1
275	1	7	2007	1	0	0	0	0	0	1	0	0	0	0	1	1	1	2	1	0	0	NO RED	1
276	1	7	2007	1	0	0	0	0	0	2	0	1	0	0	3	2	2	2	1	1	2	RED	1
277	1	7	2007	1	0	0	0	0	0	2	0	0	0	0	2	1	1	1	1	0	0	NO RED	1
278	1	7	2007	1	0	0	0	0	0	1	0	1	0	0	2	2	2	1	1	0	0	NO RED	1
279	1	7	2007	1	0	0	0	0	0	1	0	0	0	0	1	1	1	1	1	0	0	NO RED	1
280	1	7	2007	1	0	0	0	0	0	1	0	0	0	0	1	1	1	2	1	0	0	NO RED	1
281	1	7	2007	1	0	0	0	0	0	4	0	0	0	0	4	1	1	1	1	1	2	RED	1
282	1	7	2007	1	0	0	0	0	0	1	0	0	0	0	1	1	1	2	1	0	0	NO RED	1
283	1	7	2007	1	0	0	0	0	0	1	0	0	0	0	1	1	1	2	1	0	0	NO RED	1
284	1	7	2007	1	0	0	0	0	0	2	0	0	0	0	2	1	1	1	1	1	2	RED	1
285	1	7	2007	1	0	0	0	0	0	1	0	0	0	0	1	1	1	2	1	0	0	NO RED	1
286	1	7	2007	1	0	0	0	0	0	1	0	0	0	0	1	1	1	2	1	0	0	NO RED	1
287	1	7	2007	1	0	0	0	0	0	2	0	0	0	0	2	1	1	2	1	1	2	RED	1
288	1	7	2007	1	0	0	0	0	0	1	0	0	0	0	1	1	1	2	1	0	0	NO RED	1
289	1	7	2007	1	0	0	0	0	0	1	0	0	0	0	1	1	1	2	1	0	0	NO RED	1
290	1	7	2007	1	0	0	0	0	0	1	0	0	0	0	1	1	1	1	1	0	0	NO RED	1
291	1	7	2007	1	0	0	0	0	0	1	0	0	0	0	1	1	1	1	1	0	0	NO RED	1
292	1	7	2007	1	0	0	0	0	0	1	0	0	0	0	1	1	1	2	1	0	0	NO RED	1
293	1	7	2007	1	0	0	0	0	0	1	0	0	0	0	1	1	1	2	1	0	0	NO RED	1
294	1	7	2007	1	0	0	0	0	0	2	0	0	0	0	2	1	1	2	1	0	0	NO RED	1
295	1	7	2007	1	0	0	0	0	0	1	0	0	0	0	1	1	1	1	1	0	0	NO RED	1
296	1	7	2007	1	0	0	0	0	0	2	0	0	0	0	2	1	1	2	1	0	0	NO RED	1
297	1	7	2007	1	0	0	0	0	0	0	0	1	0	0	1	1	1	1	1	0	0	NO RED	1
298	1	7	2007	1	0	0	0	0	0	1	0	0	0	0	1	1	1	2	1	0	0	NO RED	1
299	1	7	2007	1	0	0	0	0	0	3	0	0	1	0	4	2	2	2	1	1	2	RED	1
300	1	7	2007	1	0	0	0	0	0	1	0	0	0	0	1	1	1	2	1	0	0	NO RED	1
301	1	7	2007	1	0	0	0	0	0	2	0	0	0	0	2	1	1	2	1	0	0	NO RED	1
302	1	7	2007	1	0	0	0	0	0	1	0	1	0	0	2	2	2	2	1	0	0	NO RED	1
303	1	7	2007	1	0	0	0	0	0	2	0	0	0	0	2	1	1	2	1	0	0	NO RED	1
304	1	7	2007	1	0	0	0	0	0	1	0	0	0	0	1	1	1	2	1	0	0	NO RED	1
305	1	7	2007	1	0	0	0	0	0	0	0	1	0	0	1	1	1	2	1	0	0	NO RED	1
306	1	7	2007	1	0	0	0	0	0	1	0	0	0	0	1	1	1	2	1	0	0	NO RED	1
307	1	7	2007	1	0	0	0	0	0	6	0	0	0	0	6	1	1	1	1	1	2	RED	1
308	1	7	2007	1	0	0	0	0	0	1	0	0	0	0	1	1	1	2	1	0	0	NO RED	1
309	1	7	2007	1	0	0	0	0	0	1	0	0	0	0	1	1	1	2	1	0	0	NO RED	1
310	1	7	2007	1	0	0	0	0	0	1	0	0	0	0	1	1	1	2	1	0	0	NO RED	1
311	1	7	2007	1	0	0	0	0	0	0	0	1	0	0	1	1	1	1	1	0	0	NO RED	1
312	1	7	2007	1	0	0	0	0	0	0	0	1	0	0	1	1	1	2	1	0	0	NO RED	1
313	1	7	2007	1	0	0	0	0	0	1	0	0	0	0	1	1	1	1	1	0	0	NO RED	1
314	1	7	2007	1	0	0	0	0	0	1	0	0	0	0	1	1	1	2	1	0	0	NO RED	1
315	1	7	2007	1	0	0	0	0	0	1	0	0	0	0	1	1	1	2	1	0	0	NO RED	1
316	1	7	2007	1	0	0	0	0	0	2	0	0	0	0	2	1	1	2	1	0	0	NO RED	1
317	1	7	2007	1	0	0	0	0	0	1	0	0	0	0	1	1	1	1	1	0	0	NO RED	1
318	1	7	2007	1	0	0	0	0	0	1	0	1	0	0	2	2	2	2	1	1	2	RED	1
319	1	7	2007	1	0	0	0	0	0	3	0	0	0	0	3	1	1	1	1	1	2	RED	1
320	1	7	2007	1	0	0	0	0	0	2	0	0	0	0	2	1	1	2	1	0	0	NO RED	1
321	1	7	2007	1	0	0	0	0	0	2	0	0	1	0	3	2	2	2	1	0	0	NO RED	1
322	1	7	2007	1	0	0	0	0	0	1	0	0	0	0	1	1	1	2	1	0	0	NO RED	1
323	1	7	2007	1	0	0	0	0	0	0	0	1	0	0	1	1	1	2	1	0	0	NO RED	1
324	1	7	2007	1	0	0	0	0	0	1	0	0	0	0	1	1	1	2	1	0	0	NO RED	1
325	1	7	2007	1	0	0	0	0	0	1	0	0	0	0	1	1	1	1	1	0	0	NO RED	1
326	1	7	2007	1	0	0	0	0	0	1	0	0	0	0	1	1	1	2	1	0	0	NO RED	1
327	1	7	2007	1	0	0	0	0	0	0	0	1	0	0	1	1	1	2	1	0	0	NO RED	1
328	1	7	2007	1	0	0	1	0	0	1	0	0	0	0	2	2	2	2	1	0	0	NO RED	1
329	1	7	2007	1	0	0	0	0	0	0	0	1	0	0	1	1	1	2	1	0	0	NO RED	1
330	1	7	2007	1	0	0	0	0	0	2	0	0	0	0	2	1	1	1	1	0	0	NO RED	1
331	1	7	2007	1	0	0	1	0	0	2	0	0	0	0	3	2	2	2	1	1	2	RED	1
332	1	7	2007	1	0	0	0	0	0	2	0	0	0	0	2	1	1	1	1	0	0	NO RED	1
333	1	7	2007	1	0	0	0	0	0	1	0	0	0	0	1	1	1	2	1	0	0	NO RED	1
334	1	7	2007	1	0	0	0	0	0	1	0	0	0	0	1	1	1	1	1	0	0	NO RED	1
335	1	7	2007	1	0	0	0	0	0	3	0	0	0	0	3	1	1	1	1	1	2	RED	1
336	1	7	2007	1	0	0	0	0	0	2	0	0	0	0	2	1	1	2	1	0	0	NO RED	1
337	1	7	2007	1	0	0	0	0	0	2	0	0	0	0	2	1	1	2	1	0	0	NO RED	1
338	1	7	2007	1	0	0	0	0	0	2	0	0	0	0	2	1	1	1	1	0	0	NO RED	1
339	1	7	2007	1	0	0	0	0	0	1	0	0	0	0	1	1	1	2	1	0	0	NO RED	1
340	1	7	2007	1	0	0	0	0	0	1	0	0	0	0	1	1	1	1	1	0	0	NO RED	1
341	1	7	2007	1	0	0	0	0	0	1	0	1	0	0	2	2	2	2	1	0	0	NO RED	1
342	1	7	2007	1	0	0	0	0	0	1	0	0	0	0	1	1	1	2	1	0	0	NO RED	1
343	1	7	2007	1	0	0	0	0	0	0	0	1	0	0	1	1	1	1	1	0	0	NO RED	1
344	1	7	2007	1	0	0	0	0	0	0	0	1	0	0	1	1	1	1	1	0	0	NO RED	1
345	1	7	2007	1	0	0	0	0	0	1	0	0	0	0	1	1	1	1	1	0	0	NO RED	1
346	1	7	2007	1	0	0	0	0	0	3	0	0	0	0	3	1	1	2	1	0	0	NO RED	1
347	1	7	2007	1	0	0	1	0	0	1	0	0	0	0	2	2	2	2	1	1	2	RED	1
348	1	7	2007	1	0	0	0	0	0	1	0	0	0	0	1	1	1	2	1	1	2	RED	1
349	1	7	2007	1	0	0	0	0	0	1	0	0	0	0	1	1	1	2	1	1	2	RED	1
350	1	7	2007	1	0	0	0	0	0	1	0	0	0	0	1	1	1	1	1	0	0	NO RED	1
351	1	7	2007	1	0	0	0	0	0	5	0	0	0	0	5	1	1	1	1	1	2	RED	1
352	1	7	2007	1	0	0	0	0	0	1	0	0	0	0	1	1	1	1	1	0	0	NO RED	1
353	1	7	2007	1	0	0	0	0	0	1	0	0	1	0	2	2	2	1	1	0	0	NO RED	1
354	1	7	2007	1	0	1	0	0	0	1	0	0	1	0	3	3	3	1	1	1	2	RED	1
355	1	7	2007	1	0	0	1	0	0	0	0	0	0	0	1	1	1	2	1	0	0	NO RED	1
356	1	7	2007	1	0	0	1	0	0	0	0	0	0	0	1	1	1	2	1	0	0	NO RED	1
357	1	7	2007	1	0	0	0	0	0	1	0	0	1	0	2	2	2	1	1	0	0	NO RED	1
358	1	7	2007	1	0	0	0	0	0	1	0	0	0	0	1	1	1	2	1	0	0	NO RED	1
359	1	7	2007	1	0	0	2	0	0	2	0	0	1	0	5	3	3	2	1	0	0	NO RED	1
360	1	7	2007	1	0	1	0	0	0	1	0	0	0	0	2	2	2	1	1	0	0	NO RED	1
361	1	7	2007	1	0	0	1	0	0	0	0	0	0	0	1	1	1	2	1	0	0	NO RED	1
362	1	7	2007	1	0	0	0	0	0	2	0	0	0	0	2	1	1	1	1	0	0	NO RED	1
363	1	7	2007	1	0	0	0	0	0	0	0	0	2	0	2	1	1	2	1	0	0	NO RED	1
364	1	7	2007	1	0	0	0	0	0	2	0	0	1	0	3	2	2	1	1	1	2	RED	1
365	1	7	2007	1	0	0	0	0	0	1	0	0	0	0	1	1	1	2	1	0	0	NO RED	1
366	1	7	2007	1	0	1	0	0	0	0	0	0	0	0	1	1	1	1	1	0	0	NO RED	1
367	1	7	2007	1	1	0	0	0	0	0	0	0	0	0	1	1	1	2	1	0	0	NO RED	1
368	1	7	2007	1	0	0	0	0	0	0	0	0	0	0	0	0		1	1	0	0	NO RED	0
369	1	7	2007	1	0	0	0	0	0	0	0	0	0	0	0	0		1	1	0	0	NO RED	0
370	1	7	2007	1	0	0	0	0	0	0	0	0	0	0	0	0		1	1	0	0	NO RED	0
371	1	7	2007	1	0	0	0	0	0	0	0	0	0	0	0	0		1	1	0	0	NO RED	0
372	1	7	2007	1	0	0	0	0	0	0	0	0	0	0	0	0		1	1	0	0	NO RED	0
373	1	7	2007	1	0	0	0	0	0	0	0	0	0	0	0	0		1	1	0	0	NO RED	0
374	1	7	2007	1	0	0	0	0	0	0	0	0	0	0	0	0		1	1	0	0	NO RED	0
375	1	7	2007	1	0	0	0	0	0	0	0	0	0	0	0	0		1	1	0	0	NO RED	0
376	1	7	2007	1	0	0	0	0	0	0	0	0	0	0	0	0		1	1	0	0	NO RED	0
377	1	7	2007	1	0	0	0	0	0	0	0	0	0	0	0	0		1	1	0	0	NO RED	0
378	1	7	2007	1	0	0	0	0	0	0	0	0	0	0	0	0		1	1	0	0	NO RED	0
379	1	7	2007	1	0	0	0	0	0	0	0	0	0	0	0	0		1	1	0	0	NO RED	0
380	1	7	2007	1	0	0	0	0	0	0	0	0	0	0	0	0		1	1	0	0	NO RED	0
381	1	7	2007	1	0	0	0	0	0	0	0	0	0	0	0	0		1	1	0	0	NO RED	0
382	1	7	2007	1	0	0	0	0	0	0	0	0	0	0	0	0		1	1	0	0	NO RED	0
383	1	7	2007	1	0	0	0	0	0	0	0	0	0	0	0	0		1	1	0	0	NO RED	0
384	1	7	2007	1	0	0	0	0	0	0	0	0	0	0	0	0		1	1	0	0	NO RED	0
385	1	7	2007	1	0	0	0	0	0	0	0	0	0	0	0	0		1	1	0	0	NO RED	0
386	1	7	2007	1	0	0	0	0	0	0	0	0	0	0	0	0		1	1	0	0	NO RED	0
387	1	7	2007	1	0	0	0	0	0	0	0	0	0	0	0	0		1	1	0	0	NO RED	0
388	1	7	2007	1	0	0	0	0	0	0	0	0	0	0	0	0		1	1	0	0	NO RED	0
389	1	7	2007	1	0	0	0	0	0	0	0	0	0	0	0	0		1	1	0	0	NO RED	0
390	1	7	2007	1	0	0	0	0	0	0	0	0	0	0	0	0		1	1	0	0	NO RED	0
391	1	7	2007	1	0	0	0	0	0	0	0	0	0	0	0	0		1	1	0	0	NO RED	0
392	1	7	2007	1	0	0	0	0	0	0	0	0	0	0	0	0		1	1	0	0	NO RED	0
393	1	7	2007	1	0	0	0	0	0	0	0	0	0	0	0	0		1	1	0	0	NO RED	0
394	1	7	2007	1	0	0	0	0	0	0	0	0	0	0	0	0		1	1	0	0	NO RED	0
395	1	7	2007	1	0	0	0	0	0	0	0	0	0	0	0	0		1	1	0	0	NO RED	0
396	1	7	2007	1	0	0	0	0	0	0	0	0	0	0	0	0		1	1	0	0	NO RED	0
397	1	7	2007	1	0	0	0	0	0	0	0	0	0	0	0	0		1	1	0	0	NO RED	0
398	1	7	2007	1	0	0	0	0	0	0	0	0	0	0	0	0		2	1	0	0	NO RED	0
399	1	7	2007	1	0	0	0	0	0	0	0	0	0	0	0	0		2	1	0	0	NO RED	0
400	1	7	2007	1	0	0	0	0	0	0	0	0	0	0	0	0		2	1	0	0	NO RED	0
401	1	7	2007	1	0	0	0	0	0	0	0	0	0	0	0	0		2	1	0	0	NO RED	0
402	1	7	2007	1	0	0	0	0	0	0	0	0	0	0	0	0		2	1	0	0	NO RED	0
403	1	7	2007	1	0	0	0	0	0	0	0	0	0	0	0	0		2	1	0	0	NO RED	0
404	1	7	2007	1	0	0	0	0	0	0	0	0	0	0	0	0		2	1	0	0	NO RED	0
405	1	7	2007	1	0	0	0	0	0	0	0	0	0	0	0	0		2	1	0	0	NO RED	0
406	1	7	2007	1	0	0	0	0	0	0	0	0	0	0	0	0		2	1	0	0	NO RED	0
407	1	7	2007	1	0	0	0	0	0	0	0	0	0	0	0	0		2	1	0	0	NO RED	0
408	1	7	2007	1	0	0	0	0	0	0	0	0	0	0	0	0		2	1	0	0	NO RED	0
409	1	7	2007	1	0	0	0	0	0	0	0	0	0	0	0	0		2	1	0	0	NO RED	0
410	1	7	2007	1	0	0	0	0	0	0	0	0	0	0	0	0		2	1	0	0	NO RED	0
411	1	7	2007	1	0	0	0	0	0	0	0	0	0	0	0	0		2	1	0	0	NO RED	0
412	1	7	2007	1	0	0	0	0	0	0	0	0	0	0	0	0		2	1	0	0	NO RED	0
413	1	7	2007	1	0	0	0	0	0	0	0	0	0	0	0	0		2	1	0	0	NO RED	0
414	1	7	2007	1	0	0	0	0	0	0	0	0	0	0	0	0		2	1	0	0	NO RED	0
415	1	7	2007	1	0	0	0	0	0	0	0	0	0	0	0	0		2	1	0	0	NO RED	0
416	1	7	2007	1	0	0	0	0	0	0	0	0	0	0	0	0		2	1	0	0	NO RED	0
417	1	7	2007	1	0	0	0	0	0	0	0	0	0	0	0	0		2	1	0	0	NO RED	0
418	1	7	2007	1	0	0	0	0	0	0	0	0	0	0	0	0		2	1	0	0	NO RED	0
419	1	7	2007	1	0	0	0	0	0	0	0	0	0	0	0	0		2	1	0	0	NO RED	0
420	1	7	2007	1	0	0	0	0	0	0	0	0	0	0	0	0		2	1	0	0	NO RED	0
421	1	7	2007	1	0	0	0	0	0	0	0	0	0	0	0	0		2	1	0	0	NO RED	0
422	1	7	2007	1	0	0	0	0	0	0	0	0	0	0	0	0		2	1	0	0	NO RED	0
423	1	7	2007	1	0	0	0	0	0	0	0	0	0	0	0	0		2	1	0	0	NO RED	0
424	1	7	2007	1	0	0	0	0	0	0	0	0	0	0	0	0		2	1	0	0	NO RED	0
425	1	7	2007	1	0	0	0	0	0	0	0	0	0	0	0	0		2	1	0	0	NO RED	0
426	1	7	2007	1	0	0	0	0	0	0	0	0	0	0	0	0		2	1	0	0	NO RED	0
427	1	7	2007	1	0	0	0	0	0	0	0	0	0	0	0	0		2	1	0	0	NO RED	0
428	1	7	2007	1	0	0	0	0	0	0	0	0	0	0	0	0		2	1	0	0	NO RED	0
429	1	7	2007	1	0	0	0	0	0	0	0	0	0	0	0	0		2	1	0	0	NO RED	0
430	1	7	2007	1	0	0	0	0	0	0	0	0	0	0	0	0		2	1	0	0	NO RED	0
431	1	7	2007	1	0	0	0	0	0	0	0	0	0	0	0	0		2	1	0	0	NO RED	0
432	1	7	2007	1	0	0	0	0	0	0	0	0	0	0	0	0		2	1	0	0	NO RED	0
433	1	7	2007	1	0	0	0	0	0	0	0	0	0	0	0	0		2	1	0	0	NO RED	0
434	1	7	2007	1	0	0	0	0	0	0	0	0	0	0	0	0		2	1	0	0	NO RED	0
435	1	7	2007	1	0	0	0	0	0	0	0	0	0	0	0	0		2	1	0	0	NO RED	0
436	1	7	2007	1	0	0	0	0	0	0	0	0	0	0	0	0		2	1	0	0	NO RED	0
437	1	8	2007	1	0	0	0	0	0	0	0	0	1	0	1	1	1	2	1	0	0	NO RED	1
438	1	8	2007	1	0	0	0	0	0	4	0	0	0	0	4	1	1	2	1	0	0	NO RED	1
439	1	8	2007	1	0	0	0	0	0	1	0	0	0	0	1	1	1	2	1	0	0	NO RED	1
440	1	8	2007	1	0	0	0	0	0	1	0	0	0	0	1	1	1	2	1	0	0	NO RED	1
441	1	8	2007	1	0	0	0	0	0	1	0	0	0	0	1	1	1	2	1	0	0	NO RED	1
442	1	8	2007	1	0	0	0	0	0	3	0	0	0	0	3	1	1	2	1	0	0	NO RED	1
443	1	8	2007	1	2	0	0	0	0	1	0	0	0	0	3	2	2	2	1	0	0	NO RED	1
444	1	8	2007	1	1	0	0	0	0	1	0	0	0	0	2	2	2	2	1	0	0	NO RED	1
445	1	8	2007	1	0	0	0	0	0	0	0	0	1	0	1	1	1	2	1	0	0	NO RED	1
446	1	8	2007	1	0	0	0	0	0	1	0	0	0	0	1	1	1	2	1	0	0	NO RED	1
447	1	8	2007	1	0	1	1	0	0	0	0	0	0	0	2	2	2	2	1	0	0	NO RED	1
448	1	8	2007	1	0	1	0	0	0	0	0	0	0	0	1	1	1	2	1	0	0	NO RED	1
449	1	8	2007	1	0	0	0	0	0	1	0	0	0	0	1	1	1	2	1	0	0	NO RED	1
450	1	8	2007	1	0	0	0	0	0	2	0	0	0	0	2	1	1	2	1	0	0	NO RED	1
451	1	8	2007	1	0	0	0	0	0	1	0	0	0	0	1	1	1	2	1	0	0	NO RED	1
452	1	8	2007	1	0	0	0	0	0	1	0	0	0	0	1	1	1	2	1	0	0	NO RED	1
453	1	8	2007	1	0	0	0	0	0	1	0	0	0	0	1	1	1	2	1	0	0	NO RED	1
454	1	8	2007	1	0	0	0	0	0	1	0	0	0	0	1	1	1	2	1	0	0	NO RED	1
455	1	8	2007	1	0	0	0	0	0	2	0	0	0	0	2	1	1	2	1	0	0	NO RED	1
456	1	8	2007	1	0	0	0	0	0	2	0	0	0	0	2	1	1	2	1	1	1	ALGO R	1
457	1	8	2007	1	0	1	0	0	0	0	0	0	0	0	1	1	1	2	1	0	0	NO RED	1
458	1	8	2007	1	0	0	0	0	0	2	0	0	0	0	2	1	1	2	1	0	0	NO RED	1
459	1	8	2007	1	0	0	0	0	0	4	0	0	0	0	4	1	1	2	1	1	2	RED	1
460	1	8	2007	1	0	0	0	0	0	3	0	0	0	0	3	1	1	2	1	0	0	NO RED	1
461	1	8	2007	1	0	0	0	0	0	1	0	0	0	0	1	1	1	2	1	0	0	NO RED	1
462	1	8	2007	1	0	0	0	0	0	1	0	0	0	0	1	1	1	2	1	0	0	NO RED	1
463	1	8	2007	1	0	0	0	0	0	1	0	0	0	0	1	1	1	2	1	0	0	NO RED	1
464	1	8	2007	1	0	0	0	0	0	1	0	0	0	0	1	1	1	2	1	1	1	ALGO R	1
465	1	8	2007	1	0	0	0	0	0	2	0	0	0	0	2	1	1	2	1	1	1	ALGO R	1
466	1	8	2007	1	0	0	0	0	0	2	0	0	0	0	2	1	1	2	1	0	0	NO RED	1
467	1	8	2007	1	0	0	0	0	0	1	0	0	0	0	1	1	1	2	1	0	0	NO RED	1
468	1	8	2007	1	0	0	0	0	0	3	0	0	0	0	3	1	1	2	1	0	0	NO RED	1
469	1	8	2007	1	0	0	0	0	0	3	0	0	2	0	5	2	2	2	1	1	2	RED	1
470	1	8	2007	1	0	0	0	0	0	1	0	0	0	0	1	1	1	2	1	1	1	ALGO R	1
471	1	8	2007	1	0	0	0	0	0	1	0	0	0	0	1	1	1	2	1	0	0	NO RED	1
472	1	8	2007	1	0	0	0	0	0	1	0	0	0	0	1	1	1	2	1	0	0	NO RED	1
473	1	8	2007	1	0	0	0	0	0	1	0	0	0	0	1	1	1	2	1	0	0	NO RED	1
474	1	8	2007	1	0	0	0	0	0	1	0	0	0	0	1	1	1	2	1	0	0	NO RED	1
475	1	8	2007	1	0	0	0	0	0	1	0	0	0	0	1	1	1	2	1	0	0	NO RED	1
476	1	8	2007	1	0	0	0	0	0	1	0	0	0	0	1	1	1	2	1	0	0	NO RED	1
477	1	8	2007	1	0	0	0	0	0	1	0	0	0	0	1	1	1	2	1	0	0	NO RED	1
478	1	8	2007	1	0	0	0	0	0	2	0	0	0	0	2	1	1	2	1	0	0	NO RED	1
479	1	8	2007	1	0	0	0	0	0	1	0	0	0	0	1	1	1	2	1	0	0	NO RED	1
480	1	8	2007	1	0	0	0	0	0	1	0	0	0	0	1	1	1	2	1	0	0	NO RED	1
481	1	8	2007	1	0	0	0	0	0	1	0	0	0	0	1	1	1	2	1	0	0	NO RED	1
482	1	8	2007	1	0	0	0	0	0	1	0	0	0	0	1	1	1	2	1	0	0	NO RED	1
483	1	8	2007	1	0	0	0	0	0	1	0	0	0	0	1	1	1	2	1	0	0	NO RED	1
484	1	8	2007	1	0	0	0	0	0	1	0	0	0	0	1	1	1	2	1	0	0	NO RED	1
485	1	8	2007	1	0	0	0	0	0	1	0	0	0	0	1	1	1	2	1	0	0	NO RED	1
486	1	8	2007	1	0	0	0	0	0	1	0	0	0	0	1	1	1	2	1	0	0	NO RED	1
487	1	8	2007	1	0	0	0	0	0	1	0	0	0	0	1	1	1	2	1	0	0	NO RED	1
488	1	8	2007	1	0	0	0	0	0	1	0	0	0	0	1	1	1	2	1	0	0	NO RED	1
489	1	8	2007	1	0	0	0	0	0	1	0	0	0	0	1	1	1	2	1	0	0	NO RED	1
490	1	8	2007	1	0	0	0	0	0	1	0	0	0	0	1	1	1	2	1	0	0	NO RED	1
491	1	8	2007	1	0	0	0	0	0	1	0	0	0	0	1	1	1	2	1	0	0	NO RED	1
492	1	8	2007	1	0	0	0	0	0	1	0	0	0	0	1	1	1	2	1	0	0	NO RED	1
493	1	8	2007	1	0	0	0	0	0	1	0	0	0	0	1	1	1	2	1	0	0	NO RED	1
494	1	8	2007	1	0	0	0	0	0	1	0	0	0	0	1	1	1	2	1	0	0	NO RED	1
495	1	8	2007	1	0	0	0	0	0	1	0	0	0	0	1	1	1	2	1	0	0	NO RED	1
496	1	8	2007	1	0	0	0	0	0	1	0	0	0	0	1	1	1	2	1	0	0	NO RED	1
497	1	8	2007	1	0	0	0	0	0	1	0	0	0	0	1	1	1	2	1	0	0	NO RED	1
498	1	8	2007	1	0	0	0	0	0	2	0	0	0	0	2	1	1	2	1	0	0	NO RED	1
499	1	8	2007	1	0	0	0	0	0	2	0	0	0	0	2	1	1	2	1	0	0	NO RED	1
500	1	8	2007	1	0	0	0	0	0	2	0	0	0	0	2	1	1	2	1	0	0	NO RED	1
501	1	8	2007	1	0	0	0	0	0	2	0	0	0	0	2	1	1	2	1	0	0	NO RED	1
502	1	8	2007	1	0	0	0	0	0	2	0	0	0	0	2	1	1	2	1	0	0	NO RED	1
503	1	8	2007	1	1	0	0	0	0	1	0	0	0	0	2	2	2	2	1	0	0	NO RED	1
504	1	8	2007	1	0	0	0	0	0	1	0	0	0	0	1	1	1	2	1	0	0	NO RED	1
505	1	8	2007	1	3	0	0	0	0	4	0	0	0	0	7	2	2	2	1	0	0	NO RED	1
506	1	8	2007	1	0	0	0	0	0	1	0	0	0	0	1	1	1	2	1	0	0	NO RED	1
507	1	8	2007	1	0	0	0	0	0	1	0	0	1	0	2	2	2	2	1	0	0	NO RED	1
508	1	8	2007	1	0	0	0	0	0	0	0	0	1	0	1	1	1	2	1	0	0	NO RED	1
509	1	8	2007	1	0	0	0	0	0	0	0	0	1	0	1	1	1	2	1	0	0	NO RED	1
510	1	8	2007	1	0	0	0	0	0	0	0	0	1	0	1	1	1	2	1	0	0	NO RED	1
511	1	8	2007	1	0	0	0	0	0	0	0	0	1	0	1	1	1	2	1	0	0	NO RED	1
512	1	8	2007	1	0	0	0	0	0	0	0	0	1	0	1	1	1	2	1	0	0	NO RED	1
513	1	8	2007	1	0	0	0	0	0	0	0	0	1	0	1	1	1	2	1	0	0	NO RED	1
514	1	8	2007	1	0	0	0	0	0	1	0	0	0	0	1	1	1	2	1	0	0	NO RED	1
515	1	8	2007	1	0	0	0	0	0	1	0	0	0	0	1	1	1	2	1	0	0	NO RED	1
516	1	8	2007	1	0	0	0	0	0	1	0	0	0	0	1	1	1	2	1	0	0	NO RED	1
517	1	8	2007	1	0	0	0	0	0	1	0	0	0	0	1	1	1	2	1	0	0	NO RED	1
518	1	8	2007	1	0	0	0	0	0	1	0	0	0	0	1	1	1	2	1	0	0	NO RED	1
519	1	8	2007	1	0	0	0	0	0	2	0	0	0	0	2	1	1	2	1	0	0	NO RED	1
520	1	8	2007	1	0	0	0	0	0	1	0	0	0	0	1	1	1	2	1	0	0	NO RED	1
521	1	8	2007	1	0	0	0	0	0	1	0	0	0	0	1	1	1	2	1	1	2	RED	1
522	1	8	2007	1	0	0	0	0	0	1	0	0	1	0	2	2	2	2	1	0	0	NO RED	1
523	1	8	2007	1	0	0	0	0	0	0	0	0	1	0	1	1	1	2	1	0	0	NO RED	1
524	1	8	2007	1	0	0	0	0	0	0	0	0	1	0	1	1	1	2	1	0	0	NO RED	1
525	1	8	2007	1	0	0	0	0	0	0	0	0	1	0	1	1	1	2	1	0	0	NO RED	1
526	1	8	2007	1	0	0	0	0	0	0	0	0	1	0	1	1	1	2	1	0	0	NO RED	1
527	1	8	2007	1	0	0	0	0	0	0	0	0	1	0	1	1	1	2	1	0	0	NO RED	1
528	1	8	2007	1	1	0	0	0	0	1	0	0	0	0	2	2	2	2	1	0	0	NO RED	1
529	1	8	2007	1	0	0	0	0	0	0	0	0	1	0	1	1	1	2	1	0	0	NO RED	1
530	1	8	2007	1	0	0	0	0	0	1	0	0	0	0	1	1	1	2	1	0	0	NO RED	1
531	1	8	2007	1	0	0	0	0	0	1	0	0	0	0	1	1	1	2	1	0	0	NO RED	1
532	1	8	2007	1	0	0	0	0	0	1	0	0	0	0	1	1	1	1	1	0	0	NO RED	1
533	1	8	2007	1	0	0	0	0	0	2	0	0	0	0	2	1	1	1	1	0	0	NO RED	1
534	1	8	2007	1	0	0	0	0	0	1	0	0	0	0	1	1	1	1	1	0	0	NO RED	1
535	1	8	2007	1	0	0	0	0	0	1	0	0	0	0	1	1	1	1	1	0	0	NO RED	1
536	1	8	2007	1	0	0	0	0	0	0	0	0	1	0	1	1	1	1	1	0	0	NO RED	1
537	1	8	2007	1	0	0	0	0	0	3	0	0	0	0	3	1	1	1	1	0	0	NO RED	1
538	1	8	2007	1	0	0	0	0	0	2	0	0	0	0	2	1	1	1	1	0	0	NO RED	1
539	1	8	2007	1	0	0	0	0	0	1	0	0	0	0	1	1	1	1	1	0	0	NO RED	1
540	1	8	2007	1	0	0	0	0	0	2	0	0	0	0	2	1	1	1	1	0	0	NO RED	1
541	1	8	2007	1	0	0	0	0	0	1	0	0	0	0	1	1	1	1	1	0	0	NO RED	1
542	1	8	2007	1	0	0	0	0	0	1	0	0	0	0	1	1	1	1	1	0	0	NO RED	1
543	1	8	2007	1	0	0	0	0	0	2	0	0	0	0	2	1	1	1	1	0	0	NO RED	1
544	1	8	2007	1	0	0	0	0	0	1	0	0	0	0	1	1	1	1	1	0	0	NO RED	1
545	1	8	2007	1	0	0	0	0	0	3	0	0	0	0	3	1	1	1	1	0	0	NO RED	1
546	1	8	2007	1	0	0	0	0	0	4	0	0	0	0	4	1	1	1	1	1	2	RED	1
547	1	8	2007	1	0	0	0	0	0	4	0	0	0	0	4	1	1	1	1	0	0	NO RED	1
548	1	8	2007	1	0	0	0	0	0	1	0	0	0	0	1	1	1	1	1	0	0	NO RED	1
549	1	8	2007	1	0	0	0	0	0	1	0	0	0	0	1	1	1	1	1	0	0	NO RED	1
550	1	8	2007	1	0	0	0	0	0	1	0	0	0	0	1	1	1	1	1	0	0	NO RED	1
551	1	8	2007	1	0	0	0	0	0	2	0	0	0	0	2	1	1	1	1	0	0	NO RED	1
552	1	8	2007	1	0	0	0	0	0	2	0	0	0	0	2	1	1	1	1	0	0	NO RED	1
553	1	8	2007	1	0	0	0	0	0	1	0	0	2	0	3	2	2	1	1	0	0	NO RED	1
554	1	8	2007	1	0	0	0	0	0	0	0	0	1	0	1	1	1	1	1	0	0	NO RED	1
555	1	8	2007	1	0	0	0	0	0	0	0	0	1	0	1	1	1	1	1	0	0	NO RED	1
556	1	8	2007	1	0	0	0	0	0	1	0	0	0	0	1	1	1	1	1	0	0	NO RED	1
557	1	8	2007	1	0	0	0	0	0	1	0	0	0	0	1	1	1	1	1	0	0	NO RED	1
558	1	8	2007	1	0	0	0	0	0	0	0	0	1	0	1	1	1	1	1	0	0	NO RED	1
559	1	8	2007	1	0	0	0	0	0	1	0	0	1	0	2	2	2	1	1	0	0	NO RED	1
560	1	8	2007	1	0	0	0	0	0	2	0	0	1	0	3	2	2	1	1	0	0	NO RED	1
561	1	8	2007	1	0	0	0	0	0	1	0	0	0	0	1	1	1	1	1	1	2	RED	1
562	1	8	2007	1	0	0	0	0	0	0	0	0	1	0	1	1	1	1	1	0	0	NO RED	1
563	1	8	2007	1	0	0	0	0	0	1	0	0	0	0	1	1	1	1	1	0	0	NO RED	1
564	1	8	2007	1	0	0	0	0	0	1	0	0	0	0	1	1	1	1	1	0	0	NO RED	1
565	1	8	2007	1	0	0	0	0	0	1	0	0	0	0	1	1	1	1	1	0	0	NO RED	1
566	1	8	2007	1	0	0	0	0	0	0	0	0	1	0	1	1	1	1	1	0	0	NO RED	1
567	1	8	2007	1	0	0	0	0	0	0	0	0	1	0	1	1	1	1	1	0	0	NO RED	1
568	1	8	2007	1	0	0	0	0	0	1	0	0	0	0	1	1	1	1	1	0	0	NO RED	1
569	1	8	2007	1	0	0	0	0	0	2	0	0	0	0	2	1	1	1	1	0	0	NO RED	1
570	1	8	2007	1	0	0	0	0	0	1	0	0	0	0	1	1	1	1	1	0	0	NO RED	1
571	1	8	2007	1	0	0	0	0	0	0	0	0	1	0	1	1	1	1	1	0	0	NO RED	1
572	1	8	2007	1	0	0	0	0	0	3	0	0	1	0	4	2	2	1	1	0	0	NO RED	1
573	1	8	2007	1	0	0	0	0	0	0	0	0	1	0	1	1	1	1	1	0	0	NO RED	1
574	1	8	2007	1	0	0	0	0	0	0	0	0	1	0	1	1	1	1	1	0	0	NO RED	1
575	1	8	2007	1	0	0	0	0	0	0	0	0	1	0	1	1	1	1	1	0	0	NO RED	1
576	1	8	2007	1	0	0	0	0	0	0	0	0	0	0	0	0		2	1	0	0	NO RED	0
577	1	8	2007	1	0	0	0	0	0	0	0	0	0	0	0	0		2	1	0	0	NO RED	0
578	1	8	2007	1	0	0	0	0	0	0	0	0	0	0	0	0		2	1	0	0	NO RED	0
579	1	8	2007	1	0	0	0	0	0	0	0	0	0	0	0	0		2	1	0	0	NO RED	0
580	1	8	2007	1	0	0	0	0	0	0	0	0	0	0	0	0		2	1	0	0	NO RED	0
581	1	8	2007	1	0	0	0	0	0	0	0	0	0	0	0	0		2	1	0	0	NO RED	0
582	1	8	2007	1	0	0	0	0	0	0	0	0	0	0	0	0		2	1	0	0	NO RED	0
583	1	8	2007	1	0	0	0	0	0	0	0	0	0	0	0	0		2	1	0	0	NO RED	0
584	1	8	2007	1	0	0	0	0	0	0	0	0	0	0	0	0		2	1	0	0	NO RED	0
585	1	8	2007	1	0	0	0	0	0	0	0	0	0	0	0	0		2	1	0	0	NO RED	0
586	1	8	2007	1	0	0	0	0	0	0	0	0	0	0	0	0		2	1	0	0	NO RED	0
587	1	8	2007	1	0	0	0	0	0	0	0	0	0	0	0	0		2	1	0	0	NO RED	0
588	1	8	2007	1	0	0	0	0	0	0	0	0	0	0	0	0		2	1	0	0	NO RED	0
589	1	8	2007	1	0	0	0	0	0	0	0	0	0	0	0	0		2	1	0	0	NO RED	0
590	1	8	2007	1	0	0	0	0	0	0	0	0	0	0	0	0		2	1	0	0	NO RED	0
591	1	8	2007	1	0	0	0	0	0	0	0	0	0	0	0	0		2	1	0	0	NO RED	0
592	1	8	2007	1	0	0	0	0	0	0	0	0	0	0	0	0		2	1	0	0	NO RED	0
593	1	8	2007	1	0	0	0	0	0	0	0	0	0	0	0	0		2	1	0	0	NO RED	0
594	1	8	2007	1	0	0	0	0	0	0	0	0	0	0	0	0		2	1	0	0	NO RED	0
595	1	8	2007	1	0	0	0	0	0	0	0	0	0	0	0	0		2	1	0	0	NO RED	0
596	1	8	2007	1	0	0	0	0	0	0	0	0	0	0	0	0		2	1	0	0	NO RED	0
597	1	8	2007	1	0	0	0	0	0	0	0	0	0	0	0	0		2	1	0	0	NO RED	0
598	1	8	2007	1	0	0	0	0	0	0	0	0	0	0	0	0		2	1	0	0	NO RED	0
599	1	8	2007	1	0	0	0	0	0	0	0	0	0	0	0	0		2	1	0	0	NO RED	0
600	1	8	2007	1	0	0	0	0	0	0	0	0	0	0	0	0		2	1	0	0	NO RED	0
601	1	8	2007	1	0	0	0	0	0	0	0	0	0	0	0	0		2	1	0	0	NO RED	0
602	1	8	2007	1	0	0	0	0	0	0	0	0	0	0	0	0		2	1	0	0	NO RED	0
603	1	8	2007	1	0	0	0	0	0	0	0	0	0	0	0	0		2	1	0	0	NO RED	0
604	1	8	2007	1	0	0	0	0	0	0	0	0	0	0	0	0		2	1	0	0	NO RED	0
605	1	8	2007	1	0	0	0	0	0	0	0	0	0	0	0	0		2	1	0	0	NO RED	0
606	1	8	2007	1	0	0	0	0	0	0	0	0	0	0	0	0		2	1	0	0	NO RED	0
607	1	8	2007	1	0	0	0	0	0	0	0	0	0	0	0	0		2	1	0	0	NO RED	0
608	1	8	2007	1	0	0	0	0	0	0	0	0	0	0	0	0		2	1	0	0	NO RED	0
609	1	8	2007	1	0	0	0	0	0	0	0	0	0	0	0	0		2	1	0	0	NO RED	0
610	1	8	2007	1	0	0	0	0	0	0	0	0	0	0	0	0		2	1	0	0	NO RED	0
611	1	8	2007	1	0	0	0	0	0	0	0	0	0	0	0	0		2	1	0	0	NO RED	0
612	1	8	2007	1	0	0	0	0	0	0	0	0	0	0	0	0		2	1	0	0	NO RED	0
613	1	8	2007	1	0	0	0	0	0	0	0	0	0	0	0	0		2	1	0	0	NO RED	0
614	1	8	2007	1	0	0	0	0	0	0	0	0	0	0	0	0		2	1	0	0	NO RED	0
615	1	8	2007	1	0	0	0	0	0	0	0	0	0	0	0	0		2	1	0	0	NO RED	0
616	1	8	2007	1	0	0	0	0	0	0	0	0	0	0	0	0		2	1	0	0	NO RED	0
617	1	8	2007	1	0	0	0	0	0	0	0	0	0	0	0	0		2	1	0	0	NO RED	0
618	1	8	2007	1	0	0	0	0	0	0	0	0	0	0	0	0		2	1	0	0	NO RED	0
619	1	8	2007	1	0	0	0	0	0	0	0	0	0	0	0	0		2	1	0	0	NO RED	0
620	1	8	2007	1	0	0	0	0	0	0	0	0	0	0	0	0		2	1	0	0	NO RED	0
621	1	8	2007	1	0	0	0	0	0	0	0	0	0	0	0	0		2	1	0	0	NO RED	0
622	1	8	2007	1	0	0	0	0	0	0	0	0	0	0	0	0		2	1	0	0	NO RED	0
623	1	8	2007	1	0	0	0	0	0	0	0	0	0	0	0	0		2	1	0	0	NO RED	0
624	1	8	2007	1	0	0	0	0	0	0	0	0	0	0	0	0		2	1	0	0	NO RED	0
625	1	8	2007	1	0	0	0	0	0	0	0	0	0	0	0	0		2	1	0	0	NO RED	0
626	1	8	2007	1	0	0	0	0	0	0	0	0	0	0	0	0		2	1	0	0	NO RED	0
627	1	8	2007	1	0	0	0	0	0	0	0	0	0	0	0	0		2	1	0	0	NO RED	0
628	1	8	2007	1	0	0	0	0	0	0	0	0	0	0	0	0		2	1	0	0	NO RED	0
629	1	8	2007	1	0	0	0	0	0	0	0	0	0	0	0	0		2	1	0	0	NO RED	0
630	1	8	2007	1	0	0	0	0	0	0	0	0	0	0	0	0		2	1	0	0	NO RED	0
631	1	8	2007	1	0	0	0	0	0	0	0	0	0	0	0	0		2	1	0	0	NO RED	0
632	1	8	2007	1	0	0	0	0	0	0	0	0	0	0	0	0		2	1	0	0	NO RED	0
633	1	8	2007	1	0	0	0	0	0	0	0	0	0	0	0	0		2	1	0	0	NO RED	0
634	1	8	2007	1	0	0	0	0	0	0	0	0	0	0	0	0		2	1	0	0	NO RED	0
635	1	8	2007	1	0	0	0	0	0	0	0	0	0	0	0	0		2	1	0	0	NO RED	0
636	1	8	2007	1	0	0	0	0	0	0	0	0	0	0	0	0		2	1	0	0	NO RED	0
637	1	8	2007	1	0	0	0	0	0	0	0	0	0	0	0	0		2	1	0	0	NO RED	0
638	1	8	2007	1	0	0	0	0	0	0	0	0	0	0	0	0		2	1	0	0	NO RED	0
639	1	8	2007	1	0	0	0	0	0	0	0	0	0	0	0	0		2	1	0	0	NO RED	0
640	1	8	2007	1	0	0	0	0	0	0	0	0	0	0	0	0		2	1	0	0	NO RED	0
641	1	8	2007	1	0	0	0	0	0	0	0	0	0	0	0	0		2	1	0	0	NO RED	0
642	1	8	2007	1	0	0	0	0	0	0	0	0	0	0	0	0		2	1	0	0	NO RED	0
643	1	8	2007	1	0	0	0	0	0	0	0	0	0	0	0	0		2	1	0	0	NO RED	0
644	1	8	2007	1	0	0	0	0	0	0	0	0	0	0	0	0		2	1	0	0	NO RED	0
645	1	8	2007	1	0	0	0	0	0	0	0	0	0	0	0	0		2	1	0	0	NO RED	0
646	1	8	2007	1	0	0	0	0	0	0	0	0	0	0	0	0		2	1	0	0	NO RED	0
647	1	8	2007	1	0	0	0	0	0	0	0	0	0	0	0	0		2	1	0	0	NO RED	0
648	1	8	2007	1	0	0	0	0	0	0	0	0	0	0	0	0		2	1	0	0	NO RED	0
649	1	8	2007	1	0	0	0	0	0	0	0	0	0	0	0	0		2	1	0	0	NO RED	0
650	1	8	2007	1	0	0	0	0	0	0	0	0	0	0	0	0		2	1	0	0	NO RED	0
651	1	8	2007	1	0	0	0	0	0	0	0	0	0	0	0	0		2	1	0	0	NO RED	0
652	1	8	2007	1	0	0	0	0	0	0	0	0	0	0	0	0		2	1	0	0	NO RED	0
653	1	8	2007	1	0	0	0	0	0	0	0	0	0	0	0	0		2	1	0	0	NO RED	0
654	1	8	2007	1	0	0	0	0	0	0	0	0	0	0	0	0		1	1	0	0	NO RED	0
655	1	8	2007	1	0	0	0	0	0	0	0	0	0	0	0	0		1	1	0	0	NO RED	0
656	1	8	2007	1	0	0	0	0	0	0	0	0	0	0	0	0		1	1	0	0	NO RED	0
657	1	8	2007	1	0	0	0	0	0	0	0	0	0	0	0	0		1	1	0	0	NO RED	0
658	1	8	2007	1	0	0	0	0	0	0	0	0	0	0	0	0		1	1	0	0	NO RED	0
659	1	8	2007	1	0	0	0	0	0	0	0	0	0	0	0	0		1	1	0	0	NO RED	0
660	1	8	2007	1	0	0	0	0	0	0	0	0	0	0	0	0		1	1	0	0	NO RED	0
661	1	8	2007	1	0	0	0	0	0	0	0	0	0	0	0	0		1	1	0	0	NO RED	0
662	1	8	2007	1	0	0	0	0	0	0	0	0	0	0	0	0		1	1	0	0	NO RED	0
663	1	8	2007	1	0	0	0	0	0	0	0	0	0	0	0	0		1	1	0	0	NO RED	0
664	1	8	2007	1	0	0	0	0	0	0	0	0	0	0	0	0		1	1	0	0	NO RED	0
665	1	8	2007	1	0	0	0	0	0	0	0	0	0	0	0	0		1	1	0	0	NO RED	0
666	1	8	2007	1	0	0	0	0	0	0	0	0	0	0	0	0		1	1	0	0	NO RED	0
667	1	8	2007	1	0	0	0	0	0	0	0	0	0	0	0	0		1	1	0	0	NO RED	0
668	1	8	2007	1	0	0	0	0	0	0	0	0	0	0	0	0		1	1	0	0	NO RED	0
669	1	8	2007	1	0	0	0	0	0	0	0	0	0	0	0	0		1	1	0	0	NO RED	0
670	1	8	2007	1	0	0	0	0	0	0	0	0	0	0	0	0		1	1	0	0	NO RED	0
671	1	8	2007	1	0	0	0	0	0	0	0	0	0	0	0	0		1	1	0	0	NO RED	0
672	1	8	2007	1	0	0	0	0	0	0	0	0	0	0	0	0		1	1	0	0	NO RED	0
673	1	8	2007	1	0	0	0	0	0	0	0	0	0	0	0	0		1	1	0	0	NO RED	0
674	1	8	2007	1	0	0	0	0	0	0	0	0	0	0	0	0		1	1	0	0	NO RED	0
675	1	8	2007	1	0	0	0	0	0	0	0	0	0	0	0	0		1	1	0	0	NO RED	0
676	1	8	2007	1	0	0	0	0	0	0	0	0	0	0	0	0		1	1	0	0	NO RED	0
677	1	8	2007	1	0	0	0	0	0	0	0	0	0	0	0	0		1	1	0	0	NO RED	0
678	1	8	2007	1	0	0	0	0	0	0	0	0	0	0	0	0		1	1	0	0	NO RED	0
679	1	8	2007	1	0	0	0	0	0	0	0	0	0	0	0	0		1	1	0	0	NO RED	0
680	1	8	2007	1	0	0	0	0	0	0	0	0	0	0	0	0		1	1	0	0	NO RED	0
681	1	8	2007	1	0	0	0	0	0	0	0	0	0	0	0	0		1	1	0	0	NO RED	0
682	1	8	2007	1	0	0	0	0	0	0	0	0	0	0	0	0		1	1	0	0	NO RED	0
683	1	8	2007	1	0	0	0	0	0	0	0	0	0	0	0	0		1	1	0	0	NO RED	0
684	1	8	2007	1	0	0	0	0	0	0	0	0	0	0	0	0		1	1	0	0	NO RED	0
685	1	8	2007	1	0	0	0	0	0	0	0	0	0	0	0	0		1	1	0	0	NO RED	0
686	1	8	2007	1	0	0	0	0	0	0	0	0	0	0	0	0		1	1	0	0	NO RED	0
687	1	8	2007	1	0	0	0	0	0	0	0	0	0	0	0	0		1	1	0	0	NO RED	0
688	1	8	2007	1	0	0	0	0	0	0	0	0	0	0	0	0		1	1	0	0	NO RED	0
689	1	8	2007	1	0	0	0	0	0	0	0	0	0	0	0	0		1	1	0	0	NO RED	0
690	1	8	2007	1	0	0	0	0	0	0	0	0	0	0	0	0		1	1	0	0	NO RED	0
691	1	8	2007	1	0	0	0	0	0	0	0	0	0	0	0	0		1	1	0	0	NO RED	0
692	1	8	2007	1	0	0	0	0	0	0	0	0	0	0	0	0		1	1	0	0	NO RED	0
693	1	8	2007	1	0	0	0	0	0	0	0	0	0	0	0	0		1	1	0	0	NO RED	0
694	1	8	2007	1	0	0	0	0	0	0	0	0	0	0	0	0		1	1	0	0	NO RED	0
695	1	8	2007	1	0	0	0	0	0	0	0	0	0	0	0	0		1	1	0	0	NO RED	0
696	1	8	2007	1	0	0	0	0	0	0	0	0	0	0	0	0		1	1	0	0	NO RED	0
697	1	8	2007	1	0	0	0	0	0	0	0	0	0	0	0	0		1	1	0	0	NO RED	0
698	1	8	2007	1	0	0	0	0	0	0	0	0	0	0	0	0		1	1	0	0	NO RED	0
699	1	8	2007	1	0	0	0	0	0	0	0	0	0	0	0	0		1	1	0	0	NO RED	0
700	1	8	2007	1	0	0	0	0	0	0	0	0	0	0	0	0		1	1	0	0	NO RED	0
701	1	8	2007	1	0	0	0	0	0	0	0	0	0	0	0	0		1	1	0	0	NO RED	0
702	1	8	2007	1	0	0	0	0	0	0	0	0	0	0	0	0		1	1	0	0	NO RED	0
703	1	8	2007	1	0	0	0	0	0	0	0	0	0	0	0	0		1	1	0	0	NO RED	0
704	1	8	2007	1	0	0	0	0	0	0	0	0	0	0	0	0		1	1	0	0	NO RED	0
705	1	8	2007	1	0	0	0	0	0	0	0	0	0	0	0	0		1	1	0	0	NO RED	0
706	1	8	2007	1	0	0	0	0	0	0	0	0	0	0	0	0		1	1	0	0	NO RED	0
707	1	8	2007	1	0	0	0	0	0	0	0	0	0	0	0	0		1	1	0	0	NO RED	0
708	1	8	2007	1	0	0	0	0	0	0	0	0	0	0	0	0		1	1	0	0	NO RED	0
709	1	8	2007	1	0	0	0	0	0	0	0	0	0	0	0	0		1	1	0	0	NO RED	0
710	1	8	2007	1	0	0	0	0	0	0	0	0	0	0	0	0		1	1	0	0	NO RED	0
711	1	8	2007	1	0	0	0	0	0	0	0	0	0	0	0	0		1	1	0	0	NO RED	0
712	1	8	2007	1	0	0	0	0	0	0	0	0	0	0	0	0		1	1	0	0	NO RED	0
713	1	8	2007	1	0	0	0	0	0	0	0	0	0	0	0	0		1	1	0	0	NO RED	0
714	1	8	2007	1	0	0	0	0	0	0	0	0	0	0	0	0		1	1	0	0	NO RED	0
715	1	8	2007	1	0	0	0	0	0	0	0	0	0	0	0	0		1	1	0	0	NO RED	0
716	1	8	2007	1	0	0	0	0	0	0	0	0	0	0	0	0		1	1	0	0	NO RED	0
717	1	8	2007	1	0	0	0	0	0	0	0	0	0	0	0	0		1	1	0	0	NO RED	0
718	1	8	2007	1	0	0	0	0	0	0	0	0	0	0	0	0		1	1	0	0	NO RED	0
719	1	8	2007	1	0	0	0	0	0	0	0	0	0	0	0	0		1	1	0	0	NO RED	0
720	1	8	2007	1	0	0	0	0	0	0	0	0	0	0	0	0		1	1	0	0	NO RED	0
721	1	8	2007	1	0	0	0	0	0	0	0	0	0	0	0	0		1	1	0	0	NO RED	0
722	1	8	2007	1	0	0	0	0	0	0	0	0	0	0	0	0		1	1	0	0	NO RED	0
723	1	8	2007	1	0	0	0	0	0	0	0	0	0	0	0	0		1	1	0	0	NO RED	0
724	1	8	2007	1	0	0	0	0	0	0	0	0	0	0	0	0		1	1	0	0	NO RED	0
725	1	8	2007	1	0	0	0	0	0	0	0	0	0	0	0	0		1	1	0	0	NO RED	0
726	1	8	2007	1	0	0	0	0	0	0	0	0	0	0	0	0		1	1	0	0	NO RED	0
727	1	8	2007	1	0	0	0	0	0	0	0	0	0	0	0	0		1	1	0	0	NO RED	0
728	1	9	2007	1	0	0	0	0	0	3	0	0	0	0	3	1	1	2	1	0	0	NO RED	1
729	1	9	2007	1	0	0	0	0	0	1	0	0	0	0	1	1	1	2	1	0	0	NO RED	1
730	1	9	2007	1	0	0	0	0	0	2	0	0	0	0	2	1	1	2	1	0	0	NO RED	1
731	1	9	2007	1	0	0	0	0	0	1	0	0	0	0	1	1	1	2	1	0	0	NO RED	1
732	1	9	2007	1	0	0	0	0	0	1	0	0	0	0	1	1	1	2	1	0	0	NO RED	1
733	1	9	2007	1	0	0	0	0	0	1	0	0	0	0	1	1	1	2	1	0	0	NO RED	1
734	1	9	2007	1	0	0	0	0	0	1	0	0	0	0	1	1	1	2	1	0	0	NO RED	1
735	1	9	2007	1	0	0	0	0	0	1	0	0	0	0	1	1	1	2	1	0	0	NO RED	1
736	1	9	2007	1	0	0	0	0	0	1	0	0	0	0	1	1	1	2	1	0	0	NO RED	1
737	1	9	2007	1	0	0	0	0	0	1	0	0	0	0	1	1	1	2	1	0	0	NO RED	1
738	1	9	2007	1	0	0	0	0	0	1	0	0	0	0	1	1	1	2	1	0	0	NO RED	1
739	1	9	2007	1	0	0	0	0	0	1	0	0	0	0	1	1	1	2	1	0	0	NO RED	1
740	1	9	2007	1	0	0	0	0	0	1	0	0	0	0	1	1	1	2	1	0	0	NO RED	1
741	1	9	2007	1	0	0	0	0	0	1	0	0	0	0	1	1	1	2	1	0	0	NO RED	1
742	1	9	2007	1	0	0	0	0	0	1	0	0	0	0	1	1	1	2	1	0	0	NO RED	1
743	1	9	2007	1	0	0	0	0	0	1	0	0	0	0	1	1	1	2	1	0	0	NO RED	1
744	1	9	2007	1	0	0	0	0	0	1	0	0	0	0	1	1	1	2	1	0	0	NO RED	1
745	1	9	2007	1	0	0	0	0	0	1	0	0	0	0	1	1	1	2	1	0	0	NO RED	1
746	1	9	2007	1	0	0	0	0	0	1	0	0	0	0	1	1	1	2	1	0	0	NO RED	1
747	1	9	2007	1	0	0	0	0	0	1	0	0	0	0	1	1	1	1	1	0	0	NO RED	1
748	1	9	2007	1	0	0	0	0	0	1	0	0	0	0	1	1	1	1	1	0	0	NO RED	1
749	1	9	2007	1	0	0	0	0	0	1	0	0	0	0	1	1	1	1	1	0	0	NO RED	1
750	1	9	2007	1	0	0	0	0	0	1	0	0	0	0	1	1	1	1	1	0	0	NO RED	1
751	1	9	2007	1	0	0	0	0	0	1	0	0	0	0	1	1	1	1	1	0	0	NO RED	1
752	1	9	2007	1	0	0	0	0	0	1	0	0	0	0	1	1	1	1	1	0	0	NO RED	1
753	1	9	2007	1	0	0	0	0	0	1	0	0	0	0	1	1	1	1	1	0	0	NO RED	1
754	1	9	2007	1	0	0	0	0	0	1	0	0	0	0	1	1	1	1	1	0	0	NO RED	1
755	1	9	2007	1	0	0	0	0	0	1	0	0	0	0	1	1	1	1	1	0	0	NO RED	1
756	1	9	2007	1	0	0	0	0	0	1	0	0	0	0	1	1	1	1	1	0	0	NO RED	1
757	1	9	2007	1	0	0	0	0	0	1	0	0	0	0	1	1	1	1	1	0	0	NO RED	1
758	1	9	2007	1	0	0	0	0	0	1	0	0	0	0	1	1	1	1	1	0	0	NO RED	1
759	1	9	2007	1	0	0	0	0	0	2	0	0	0	0	2	1	1	1	1	0	0	NO RED	1
760	1	9	2007	1	0	0	0	0	0	0	0	0	0	0	0	0		1	1	0	0	NO RED	0
761	1	9	2007	1	0	0	0	0	0	0	0	0	0	0	0	0		1	1	0	0	NO RED	0
762	1	9	2007	1	0	0	0	0	0	0	0	0	0	0	0	0		1	1	0	0	NO RED	0
763	1	9	2007	1	0	0	0	0	0	0	0	0	0	0	0	0		1	1	0	0	NO RED	0
764	1	9	2007	1	0	0	0	0	0	0	0	0	0	0	0	0		1	1	0	0	NO RED	0
765	1	9	2007	1	0	0	0	0	0	0	0	0	0	0	0	0		1	1	0	0	NO RED	0
766	1	9	2007	1	0	0	0	0	0	0	0	0	0	0	0	0		1	1	0	0	NO RED	0
767	1	9	2007	1	0	0	0	0	0	0	0	0	0	0	0	0		1	1	0	0	NO RED	0
768	1	9	2007	1	0	0	0	0	0	0	0	0	0	0	0	0		1	1	0	0	NO RED	0
769	1	9	2007	1	0	0	0	0	0	0	0	0	0	0	0	0		1	1	0	0	NO RED	0
770	1	9	2007	1	0	0	0	0	0	0	0	0	0	0	0	0		1	1	0	0	NO RED	0
771	1	9	2007	1	0	0	0	0	0	0	0	0	0	0	0	0		1	1	0	0	NO RED	0
772	1	9	2007	1	0	0	0	0	0	0	0	0	0	0	0	0		1	1	0	0	NO RED	0
773	1	9	2007	1	0	0	0	0	0	0	0	0	0	0	0	0		1	1	0	0	NO RED	0
774	1	9	2007	1	0	0	0	0	0	0	0	0	0	0	0	0		1	1	0	0	NO RED	0
775	1	9	2007	1	0	0	0	0	0	0	0	0	0	0	0	0		1	1	0	0	NO RED	0
776	1	9	2007	1	0	0	0	0	0	0	0	0	0	0	0	0		1	1	0	0	NO RED	0
777	1	9	2007	1	0	0	0	0	0	0	0	0	0	0	0	0		1	1	0	0	NO RED	0
778	1	9	2007	1	0	0	0	0	0	0	0	0	0	0	0	0		1	1	0	0	NO RED	0
779	1	9	2007	1	0	0	0	0	0	0	0	0	0	0	0	0		1	1	0	0	NO RED	0
780	1	9	2007	1	0	0	0	0	0	0	0	0	0	0	0	0		1	1	0	0	NO RED	0
781	1	9	2007	1	0	0	0	0	0	0	0	0	0	0	0	0		1	1	0	0	NO RED	0
782	1	9	2007	1	0	0	0	0	0	0	0	0	0	0	0	0		1	1	0	0	NO RED	0
783	1	9	2007	1	0	0	0	0	0	0	0	0	0	0	0	0		1	1	0	0	NO RED	0
784	1	9	2007	1	0	0	0	0	0	0	0	0	0	0	0	0		1	1	0	0	NO RED	0
785	1	9	2007	1	0	0	0	0	0	0	0	0	0	0	0	0		1	1	0	0	NO RED	0
786	1	9	2007	1	0	0	0	0	0	0	0	0	0	0	0	0		1	1	0	0	NO RED	0
787	1	9	2007	1	0	0	0	0	0	0	0	0	0	0	0	0		1	1	0	0	NO RED	0
788	1	9	2007	1	0	0	0	0	0	0	0	0	0	0	0	0		1	1	0	0	NO RED	0
789	1	9	2007	1	0	0	0	0	0	0	0	0	0	0	0	0		1	1	0	0	NO RED	0
790	1	9	2007	1	0	0	0	0	0	0	0	0	0	0	0	0		1	1	0	0	NO RED	0
791	1	9	2007	1	0	0	0	0	0	0	0	0	0	0	0	0		1	1	0	0	NO RED	0
792	1	9	2007	1	0	0	0	0	0	0	0	0	0	0	0	0		1	1	0	0	NO RED	0
793	1	9	2007	1	0	0	0	0	0	0	0	0	0	0	0	0		1	1	0	0	NO RED	0
794	1	9	2007	1	0	0	0	0	0	0	0	0	0	0	0	0		1	1	0	0	NO RED	0
795	1	9	2007	1	0	0	0	0	0	0	0	0	0	0	0	0		1	1	0	0	NO RED	0
796	1	9	2007	1	0	0	0	0	0	0	0	0	0	0	0	0		1	1	0	0	NO RED	0
797	1	9	2007	1	0	0	0	0	0	0	0	0	0	0	0	0		1	1	0	0	NO RED	0
798	1	9	2007	1	0	0	0	0	0	0	0	0	0	0	0	0		1	1	0	0	NO RED	0
799	1	9	2007	1	0	0	0	0	0	0	0	0	0	0	0	0		1	1	0	0	NO RED	0
800	1	9	2007	1	0	0	0	0	0	0	0	0	0	0	0	0		1	1	0	0	NO RED	0
801	1	9	2007	1	0	0	0	0	0	0	0	0	0	0	0	0		1	1	0	0	NO RED	0
802	1	9	2007	1	0	0	0	0	0	0	0	0	0	0	0	0		1	1	0	0	NO RED	0
803	1	9	2007	1	0	0	0	0	0	0	0	0	0	0	0	0		1	1	0	0	NO RED	0
804	1	9	2007	1	0	0	0	0	0	0	0	0	0	0	0	0		1	1	0	0	NO RED	0
805	1	9	2007	1	0	0	0	0	0	0	0	0	0	0	0	0		1	1	0	0	NO RED	0
806	1	9	2007	1	0	0	0	0	0	0	0	0	0	0	0	0		1	1	0	0	NO RED	0
807	1	9	2007	1	0	0	0	0	0	0	0	0	0	0	0	0		1	1	0	0	NO RED	0
808	1	9	2007	1	0	0	0	0	0	0	0	0	0	0	0	0		1	1	0	0	NO RED	0
809	1	9	2007	1	0	0	0	0	0	0	0	0	0	0	0	0		1	1	0	0	NO RED	0
810	1	9	2007	1	0	0	0	0	0	0	0	0	0	0	0	0		1	1	0	0	NO RED	0
811	1	9	2007	1	0	0	0	0	0	0	0	0	0	0	0	0		1	1	0	0	NO RED	0
812	1	9	2007	1	0	0	0	0	0	0	0	0	0	0	0	0		1	1	0	0	NO RED	0
813	1	9	2007	1	0	0	0	0	0	0	0	0	0	0	0	0		1	1	0	0	NO RED	0
814	1	9	2007	1	0	0	0	0	0	0	0	0	0	0	0	0		1	1	0	0	NO RED	0
815	1	9	2007	1	0	0	0	0	0	0	0	0	0	0	0	0		1	1	0	0	NO RED	0
816	1	9	2007	1	0	0	0	0	0	0	0	0	0	0	0	0		1	1	0	0	NO RED	0
817	1	9	2007	1	0	0	0	0	0	0	0	0	0	0	0	0		1	1	0	0	NO RED	0
818	1	9	2007	1	0	0	0	0	0	0	0	0	0	0	0	0		1	1	0	0	NO RED	0
819	1	9	2007	1	0	0	0	0	0	0	0	0	0	0	0	0		1	1	0	0	NO RED	0
820	1	9	2007	1	0	0	0	0	0	0	0	0	0	0	0	0		1	1	0	0	NO RED	0
821	1	9	2007	1	0	0	0	0	0	0	0	0	0	0	0	0		2	1	0	0	NO RED	0
822	1	9	2007	1	0	0	0	0	0	0	0	0	0	0	0	0		2	1	0	0	NO RED	0
823	1	9	2007	1	0	0	0	0	0	0	0	0	0	0	0	0		2	1	0	0	NO RED	0
824	1	9	2007	1	0	0	0	0	0	0	0	0	0	0	0	0		2	1	0	0	NO RED	0
825	1	9	2007	1	0	0	0	0	0	0	0	0	0	0	0	0		2	1	0	0	NO RED	0
826	1	9	2007	1	0	0	0	0	0	0	0	0	0	0	0	0		2	1	0	0	NO RED	0
827	1	9	2007	1	0	0	0	0	0	0	0	0	0	0	0	0		2	1	0	0	NO RED	0
828	1	9	2007	1	0	0	0	0	0	0	0	0	0	0	0	0		2	1	0	0	NO RED	0
829	1	9	2007	1	0	0	0	0	0	0	0	0	0	0	0	0		2	1	0	0	NO RED	0
830	1	9	2007	1	0	0	0	0	0	0	0	0	0	0	0	0		2	1	0	0	NO RED	0
831	1	9	2007	1	0	0	0	0	0	0	0	0	0	0	0	0		2	1	0	0	NO RED	0
832	1	9	2007	1	0	0	0	0	0	0	0	0	0	0	0	0		2	1	0	0	NO RED	0
833	1	9	2007	1	0	0	0	0	0	0	0	0	0	0	0	0		2	1	0	0	NO RED	0
834	1	9	2007	1	0	0	0	0	0	0	0	0	0	0	0	0		2	1	0	0	NO RED	0
835	1	9	2007	1	0	0	0	0	0	0	0	0	0	0	0	0		2	1	0	0	NO RED	0
836	1	9	2007	1	0	0	0	0	0	0	0	0	0	0	0	0		2	1	0	0	NO RED	0
837	1	9	2007	1	0	0	0	0	0	0	0	0	0	0	0	0		2	1	0	0	NO RED	0
838	1	9	2007	1	0	0	0	0	0	0	0	0	0	0	0	0		2	1	0	0	NO RED	0
839	1	9	2007	1	0	0	0	0	0	0	0	0	0	0	0	0		2	1	0	0	NO RED	0
840	1	9	2007	1	0	0	0	0	0	0	0	0	0	0	0	0		2	1	0	0	NO RED	0
841	1	9	2007	1	0	0	0	0	0	0	0	0	0	0	0	0		2	1	0	0	NO RED	0
842	1	9	2007	1	0	0	0	0	0	0	0	0	0	0	0	0		2	1	0	0	NO RED	0
843	1	9	2007	1	0	0	0	0	0	0	0	0	0	0	0	0		2	1	0	0	NO RED	0
844	1	9	2007	1	0	0	0	0	0	0	0	0	0	0	0	0		2	1	0	0	NO RED	0
845	1	9	2007	1	0	0	0	0	0	0	0	0	0	0	0	0		2	1	0	0	NO RED	0
846	1	9	2007	1	0	0	0	0	0	0	0	0	0	0	0	0		2	1	0	0	NO RED	0
847	1	9	2007	1	0	0	0	0	0	0	0	0	0	0	0	0		2	1	0	0	NO RED	0
848	1	9	2007	1	0	0	0	0	0	0	0	0	0	0	0	0		2	1	0	0	NO RED	0
849	1	9	2007	1	0	0	0	0	0	0	0	0	0	0	0	0		2	1	0	0	NO RED	0
850	1	9	2007	1	0	0	0	0	0	0	0	0	0	0	0	0		2	1	0	0	NO RED	0
851	1	9	2007	1	0	0	0	0	0	0	0	0	0	0	0	0		2	1	0	0	NO RED	0
852	1	9	2007	1	0	0	0	0	0	0	0	0	0	0	0	0		2	1	0	0	NO RED	0
853	1	9	2007	1	0	0	0	0	0	0	0	0	0	0	0	0		2	1	0	0	NO RED	0
854	1	9	2007	1	0	0	0	0	0	0	0	0	0	0	0	0		2	1	0	0	NO RED	0
855	1	9	2007	1	0	0	0	0	0	0	0	0	0	0	0	0		2	1	0	0	NO RED	0
856	1	9	2007	1	0	0	0	0	0	0	0	0	0	0	0	0		2	1	0	0	NO RED	0
857	1	9	2007	1	0	0	0	0	0	0	0	0	0	0	0	0		2	1	0	0	NO RED	0
858	1	9	2007	1	0	0	0	0	0	0	0	0	0	0	0	0		2	1	0	0	NO RED	0
859	1	9	2007	1	0	0	0	0	0	0	0	0	0	0	0	0		2	1	0	0	NO RED	0
860	1	9	2007	1	0	0	0	0	0	0	0	0	0	0	0	0		2	1	0	0	NO RED	0
861	1	9	2007	1	0	0	0	0	0	0	0	0	0	0	0	0		2	1	0	0	NO RED	0
862	1	9	2007	1	0	0	0	0	0	0	0	0	0	0	0	0		2	1	0	0	NO RED	0
863	1	9	2007	1	0	0	0	0	0	0	0	0	0	0	0	0		2	1	0	0	NO RED	0
864	1	9	2007	1	0	0	0	0	0	0	0	0	0	0	0	0		2	1	0	0	NO RED	0
865	1	9	2007	1	0	0	0	0	0	0	0	0	0	0	0	0		2	1	0	0	NO RED	0
866	1	9	2007	1	0	0	0	0	0	0	0	0	0	0	0	0		2	1	0	0	NO RED	0
867	1	9	2007	1	0	0	0	0	0	0	0	0	0	0	0	0		2	1	0	0	NO RED	0
868	1	9	2007	1	0	0	0	0	0	0	0	0	0	0	0	0		2	1	0	0	NO RED	0
869	1	9	2007	1	0	0	0	0	0	0	0	0	0	0	0	0		2	1	0	0	NO RED	0
870	1	9	2007	1	0	0	0	0	0	0	0	0	0	0	0	0		2	1	0	0	NO RED	0
871	1	9	2007	1	0	0	0	0	0	0	0	0	0	0	0	0		2	1	0	0	NO RED	0
872	1	9	2007	1	0	0	0	0	0	0	0	0	0	0	0	0		2	1	0	0	NO RED	0
873	1	9	2007	1	0	0	0	0	0	0	0	0	0	0	0	0		2	1	0	0	NO RED	0
874	1	9	2007	1	0	0	0	0	0	0	0	0	0	0	0	0		2	1	0	0	NO RED	0
875	1	9	2007	1	0	0	0	0	0	0	0	0	0	0	0	0		2	1	0	0	NO RED	0
876	1	9	2007	1	0	0	0	0	0	0	0	0	0	0	0	0		2	1	0	0	NO RED	0
877	1	9	2007	1	0	0	0	0	0	0	0	0	0	0	0	0		2	1	0	0	NO RED	0
878	1	9	2007	1	0	0	0	0	0	0	0	0	0	0	0	0		2	1	0	0	NO RED	0
879	1	9	2007	1	0	0	0	0	0	0	0	0	0	0	0	0		2	1	0	0	NO RED	0
880	1	9	2007	1	0	0	0	0	0	0	0	0	0	0	0	0		2	1	0	0	NO RED	0
881	1	9	2007	1	0	0	0	0	0	0	0	0	0	0	0	0		2	1	0	0	NO RED	0
882	1	9	2007	1	0	0	0	0	0	0	0	0	0	0	0	0		2	1	0	0	NO RED	0
883	1	9	2007	1	0	0	0	0	0	0	0	0	0	0	0	0		2	1	0	0	NO RED	0
884	1	9	2007	1	0	0	0	0	0	0	0	0	0	0	0	0		2	1	0	0	NO RED	0
885	1	9	2007	1	0	0	0	0	0	0	0	0	0	0	0	0		2	1	0	0	NO RED	0
886	1	9	2007	1	0	0	0	0	0	0	0	0	0	0	0	0		2	1	0	0	NO RED	0
887	1	9	2007	1	0	0	0	0	0	0	0	0	0	0	0	0		2	1	0	0	NO RED	0
888	1	9	2007	1	0	0	0	0	0	0	0	0	0	0	0	0		2	1	0	0	NO RED	0
889	1	9	2007	1	0	0	0	0	0	0	0	0	0	0	0	0		2	1	0	0	NO RED	0
890	1	9	2007	1	0	0	0	0	0	0	0	0	0	0	0	0		2	1	0	0	NO RED	0
891	1	9	2007	1	0	0	0	0	0	0	0	0	0	0	0	0		2	1	0	0	NO RED	0
892	1	9	2007	1	0	0	0	0	0	0	0	0	0	0	0	0		2	1	0	0	NO RED	0
893	1	9	2007	1	0	0	0	0	0	0	0	0	0	0	0	0		2	1	0	0	NO RED	0
894	1	9	2007	1	0	0	0	0	0	0	0	0	0	0	0	0		2	1	0	0	NO RED	0
895	1	9	2007	1	0	0	0	0	0	0	0	0	0	0	0	0		2	1	0	0	NO RED	0
896	1	9	2007	1	0	0	0	0	0	0	0	0	0	0	0	0		2	1	0	0	NO RED	0
897	1	9	2007	1	0	0	0	0	0	0	0	0	0	0	0	0		2	1	0	0	NO RED	0
898	1	9	2007	1	0	0	0	0	0	0	0	0	0	0	0	0		2	1	0	0	NO RED	0
899	1	9	2007	1	0	0	0	0	0	0	0	0	0	0	0	0		2	1	0	0	NO RED	0
900	1	9	2007	1	0	0	0	0	0	0	0	0	0	0	0	0		2	1	0	0	NO RED	0
901	1	9	2007	1	0	0	0	0	0	0	0	0	0	0	0	0		2	1	0	0	NO RED	0
902	1	9	2007	1	0	0	0	0	0	0	0	0	0	0	0	0		2	1	0	0	NO RED	0
903	1	9	2007	1	0	0	0	0	0	0	0	0	0	0	0	0		2	1	0	0	NO RED	0
904	1	9	2007	1	0	0	0	0	0	0	0	0	0	0	0	0		2	1	0	0	NO RED	0
905	1	9	2007	1	0	0	0	0	0	0	0	0	0	0	0	0		2	1	0	0	NO RED	0
906	1	9	2007	1	0	0	0	0	0	0	0	0	0	0	0	0		2	1	0	0	NO RED	0
907	1	9	2007	1	0	0	0	0	0	0	0	0	0	0	0	0		2	1	0	0	NO RED	0
908	1	9	2007	1	0	0	0	0	0	0	0	0	0	0	0	0		2	1	0	0	NO RED	0
909	1	9	2007	1	0	0	0	0	0	0	0	0	0	0	0	0		2	1	0	0	NO RED	0
910	1	9	2007	1	0	0	0	0	0	0	0	0	0	0	0	0		2	1	0	0	NO RED	0
911	1	9	2007	1	0	0	0	0	0	0	0	0	0	0	0	0		2	1	0	0	NO RED	0
912	1	9	2007	1	0	0	0	0	0	0	0	0	0	0	0	0		2	1	0	0	NO RED	0
913	1	9	2007	1	0	0	0	0	0	0	0	0	0	0	0	0		2	1	0	0	NO RED	0
914	1	9	2007	1	0	0	0	0	0	0	0	0	0	0	0	0		2	1	0	0	NO RED	0
915	1	9	2007	1	0	0	0	0	0	0	0	0	0	0	0	0		2	1	0	0	NO RED	0
916	1	9	2007	1	0	0	0	0	0	0	0	0	0	0	0	0		2	1	0	0	NO RED	0
917	1	9	2007	1	0	0	0	0	0	0	0	0	0	0	0	0		2	1	0	0	NO RED	0
918	1	9	2007	1	0	0	0	0	0	0	0	0	0	0	0	0		2	1	0	0	NO RED	0
919	1	9	2007	1	0	0	0	0	0	0	0	0	0	0	0	0		2	1	0	0	NO RED	0
920	1	9	2007	1	0	0	0	0	0	0	0	0	0	0	0	0		2	1	0	0	NO RED	0
921	1	9	2007	1	0	0	0	0	0	0	0	0	0	0	0	0		2	1	0	0	NO RED	0
922	1	9	2007	1	0	0	0	0	0	0	0	0	0	0	0	0		2	1	0	0	NO RED	0
923	1	9	2007	1	0	0	0	0	0	0	0	0	0	0	0	0		2	1	0	0	NO RED	0
924	1	9	2007	1	0	0	0	0	0	0	0	0	0	0	0	0		2	1	0	0	NO RED	0
925	1	9	2007	1	0	0	0	0	0	0	0	0	0	0	0	0		2	1	0	0	NO RED	0
926	1	9	2007	1	0	0	0	0	0	0	0	0	0	0	0	0		2	1	0	0	NO RED	0
927	1	10	2007	1	2	0	0	0	0	0	0	0	0	0	2	1	1	2	1	0	0	NO RED	1
928	1	10	2007	1	0	0	1	0	0	0	0	0	0	0	1	1	1	2	1	0	0	NO RED	1
929	1	10	2007	1	0	0	0	0	0	1	0	0	0	0	1	1	1	2	1	0	0	NO RED	1
930	1	10	2007	1	0	0	0	0	0	1	0	0	0	0	1	1	1	2	1	0	0	NO RED	1
931	1	10	2007	1	0	0	0	0	0	1	0	0	0	0	1	1	1	2	1	0	0	NO RED	1
932	1	10	2007	1	0	0	0	0	0	1	0	0	0	0	1	1	1	1	1	0	0	NO RED	1
933	1	10	2007	1	0	0	0	0	0	1	0	0	0	0	1	1	1	1	1	0	0	NO RED	1
934	1	10	2007	1	0	0	0	0	0	1	0	0	0	0	1	1	1	1	1	0	0	NO RED	1
935	1	10	2007	1	0	0	0	0	0	0	1	0	0	0	1	1	1	1	1	0	0	NO RED	1
936	1	10	2007	1	0	0	0	0	0	1	0	0	0	0	1	1	1	1	1	0	0	NO RED	1
937	1	10	2007	1	0	0	0	0	0	1	0	0	0	0	1	1	1	1	1	0	0	NO RED	1
938	1	10	2007	1	0	0	0	0	0	1	0	0	0	0	1	1	1	2	1	0	0	NO RED	1
939	1	10	2007	1	0	0	0	0	0	1	0	0	0	0	1	1	1	2	1	0	0	NO RED	1
940	1	10	2007	1	0	0	0	0	0	1	0	0	0	0	1	1	1	2	1	0	0	NO RED	1
941	1	10	2007	1	0	0	0	0	0	1	0	0	0	0	1	1	1	1	1	0	0	NO RED	1
942	1	10	2007	1	0	0	0	0	0	1	0	0	0	0	1	1	1	1	1	0	0	NO RED	1
943	1	10	2007	1	0	0	0	0	0	1	0	0	0	0	1	1	1	1	1	0	0	NO RED	1
944	1	10	2007	1	0	0	0	0	0	1	0	0	0	0	1	1	1	2	1	0	0	NO RED	1
945	1	10	2007	1	0	0	0	0	0	1	0	0	0	0	1	1	1	2	1	0	0	NO RED	1
946	1	10	2007	1	0	0	0	0	0	1	0	0	0	0	1	1	1	1	1	0	0	NO RED	1
947	1	10	2007	1	0	0	0	0	0	1	0	0	0	0	1	1	1	2	1	0	0	NO RED	1
948	1	10	2007	1	0	0	0	0	1	0	0	0	0	0	1	1	1	1	1	0	0	NO RED	1
949	1	10	2007	1	0	0	0	0	0	1	0	0	0	0	1	1	1	1	1	0	0	NO RED	1
950	1	10	2007	1	0	0	0	0	0	1	0	0	0	0	1	1	1	1	1	0	0	NO RED	1
951	1	10	2007	1	0	0	0	0	0	1	0	0	0	0	1	1	1	1	1	0	0	NO RED	1
952	1	10	2007	1	0	0	0	0	0	1	0	0	0	0	1	1	1	1	1	0	0	NO RED	1
953	1	10	2007	1	0	0	0	0	0	1	0	0	0	0	1	1	1	2	1	0	0	NO RED	1
954	1	10	2007	1	0	0	0	0	0	1	0	0	0	0	1	1	1	2	1	0	0	NO RED	1
955	1	10	2007	1	0	0	0	0	0	1	0	0	0	0	1	1	1	2	1	0	0	NO RED	1
956	1	10	2007	1	0	0	0	0	0	1	0	0	0	0	1	1	1	1	1	0	0	NO RED	1
957	1	10	2007	1	0	0	0	0	0	1	0	0	0	0	1	1	1	1	1	0	0	NO RED	1
958	1	10	2007	1	0	0	0	0	0	1	0	0	0	0	1	1	1	1	1	0	0	NO RED	1
959	1	10	2007	1	0	0	0	0	0	1	0	0	0	0	1	1	1	1	1	0	0	NO RED	1
960	1	10	2007	1	0	0	0	0	0	1	0	0	0	0	1	1	1	1	1	0	0	NO RED	1
961	1	10	2007	1	0	0	0	0	0	1	0	0	0	0	1	1	1	1	1	0	0	NO RED	1
962	1	10	2007	1	0	0	0	0	0	2	0	0	0	0	2	1	1	1	1	0	0	NO RED	1
963	1	10	2007	1	0	0	0	0	0	1	0	0	0	0	1	1	1	1	1	0	0	NO RED	1
964	1	10	2007	1	0	0	0	0	0	1	0	0	0	0	1	1	1	1	1	0	0	NO RED	1
965	1	10	2007	1	0	0	0	0	0	1	0	0	0	0	1	1	1	1	1	0	0	NO RED	1
966	1	10	2007	1	0	0	0	0	0	1	0	0	0	0	1	1	1	2	1	0	0	NO RED	1
967	1	10	2007	1	0	0	0	0	0	1	0	0	0	0	1	1	1	2	1	0	0	NO RED	1
968	1	10	2007	1	4	0	0	0	0	1	0	0	0	0	5	2	2	2	1	1	1	ALGO RED	1
969	1	10	2007	1	0	0	0	0	0	1	0	0	0	0	1	1	1	2	1	0	0	NO RED	1
970	1	10	2007	1	0	0	0	0	0	1	0	0	0	0	1	1	1	2	1	0	0	NO RED	1
971	1	10	2007	1	0	0	0	0	0	1	0	0	0	0	1	1	1	2	1	0	0	NO RED	1
972	1	10	2007	1	0	0	0	0	0	1	0	0	0	0	1	1	1	2	1	0	0	NO RED	1
973	1	10	2007	1	0	0	0	0	0	1	0	0	0	0	1	1	1	2	1	0	0	NO RED	1
974	1	10	2007	1	0	1	0	0	0	0	0	0	0	0	1	1	1	1	1	0	0	NO RED	1
975	1	10	2007	1	0	0	0	0	0	1	0	0	0	0	1	1	1	1	1	0	0	NO RED	1
976	1	10	2007	1	0	0	0	0	0	1	0	0	0	0	1	1	1	2	1	0	0	NO RED	1
977	1	10	2007	1	0	0	0	0	0	1	0	1	0	0	2	2	2	2	1	0	0	NO RED	1
978	1	10	2007	1	0	0	0	0	0	1	0	0	0	0	1	1	1	2	1	0	0	NO RED	1
979	1	10	2007	1	0	0	0	0	0	1	0	1	0	0	2	2	2	2	1	0	0	NO RED	1
980	1	10	2007	1	0	0	0	0	0	1	0	0	0	0	1	1	1	1	1	0	0	NO RED	1
981	1	10	2007	1	0	0	0	0	0	0	0	0	0	0	0	0		2	1	0	0	NO RED	0
982	1	10	2007	1	0	0	0	0	0	0	0	0	0	0	0	0		2	1	0	0	NO RED	0
983	1	10	2007	1	0	0	0	0	0	0	0	0	0	0	0	0		2	1	0	0	NO RED	0
984	1	10	2007	1	0	0	0	0	0	0	0	0	0	0	0	0		2	1	0	0	NO RED	0
985	1	10	2007	1	0	0	0	0	0	0	0	0	0	0	0	0		2	1	0	0	NO RED	0
986	1	10	2007	1	0	0	0	0	0	0	0	0	0	0	0	0		2	1	0	0	NO RED	0
987	1	10	2007	1	0	0	0	0	0	0	0	0	0	0	0	0		2	1	0	0	NO RED	0
988	1	10	2007	1	0	0	0	0	0	0	0	0	0	0	0	0		2	1	0	0	NO RED	0
989	1	10	2007	1	0	0	0	0	0	0	0	0	0	0	0	0		2	1	0	0	NO RED	0
990	1	10	2007	1	0	0	0	0	0	0	0	0	0	0	0	0		2	1	0	0	NO RED	0
991	1	10	2007	1	0	0	0	0	0	0	0	0	0	0	0	0		2	1	0	0	NO RED	0
992	1	10	2007	1	0	0	0	0	0	0	0	0	0	0	0	0		2	1	0	0	NO RED	0
993	1	10	2007	1	0	0	0	0	0	0	0	0	0	0	0	0		2	1	0	0	NO RED	0
994	1	10	2007	1	0	0	0	0	0	0	0	0	0	0	0	0		2	1	0	0	NO RED	0
995	1	10	2007	1	0	0	0	0	0	0	0	0	0	0	0	0		2	1	0	0	NO RED	0
996	1	10	2007	1	0	0	0	0	0	0	0	0	0	0	0	0		2	1	0	0	NO RED	0
997	1	10	2007	1	0	0	0	0	0	0	0	0	0	0	0	0		2	1	0	0	NO RED	0
998	1	10	2007	1	0	0	0	0	0	0	0	0	0	0	0	0		2	1	0	0	NO RED	0
999	1	10	2007	1	0	0	0	0	0	0	0	0	0	0	0	0		2	1	0	0	NO RED	0
1000	1	10	2007	1	0	0	0	0	0	0	0	0	0	0	0	0		2	1	0	0	NO RED	0
1001	1	10	2007	1	0	0	0	0	0	0	0	0	0	0	0	0		2	1	0	0	NO RED	0
1002	1	10	2007	1	0	0	0	0	0	0	0	0	0	0	0	0		2	1	0	0	NO RED	0
1003	1	10	2007	1	0	0	0	0	0	0	0	0	0	0	0	0		2	1	0	0	NO RED	0
1004	1	10	2007	1	0	0	0	0	0	0	0	0	0	0	0	0		2	1	0	0	NO RED	0
1005	1	10	2007	1	0	0	0	0	0	0	0	0	0	0	0	0		2	1	0	0	NO RED	0
1006	1	10	2007	1	0	0	0	0	0	0	0	0	0	0	0	0		2	1	0	0	NO RED	0
1007	1	10	2007	1	0	0	0	0	0	0	0	0	0	0	0	0		2	1	0	0	NO RED	0
1008	1	10	2007	1	0	0	0	0	0	0	0	0	0	0	0	0		2	1	0	0	NO RED	0
1009	1	10	2007	1	0	0	0	0	0	0	0	0	0	0	0	0		2	1	0	0	NO RED	0
1010	1	10	2007	1	0	0	0	0	0	0	0	0	0	0	0	0		2	1	0	0	NO RED	0
1011	1	10	2007	1	0	0	0	0	0	0	0	0	0	0	0	0		2	1	0	0	NO RED	0
1012	1	10	2007	1	0	0	0	0	0	0	0	0	0	0	0	0		2	1	0	0	NO RED	0
1013	1	10	2007	1	0	0	0	0	0	0	0	0	0	0	0	0		2	1	0	0	NO RED	0
1014	1	10	2007	1	0	0	0	0	0	0	0	0	0	0	0	0		2	1	0	0	NO RED	0
1015	1	10	2007	1	0	0	0	0	0	0	0	0	0	0	0	0		2	1	0	0	NO RED	0
1016	1	10	2007	1	0	0	0	0	0	0	0	0	0	0	0	0		2	1	0	0	NO RED	0
1017	1	10	2007	1	0	0	0	0	0	0	0	0	0	0	0	0		2	1	0	0	NO RED	0
1018	1	10	2007	1	0	0	0	0	0	0	0	0	0	0	0	0		2	1	0	0	NO RED	0
1019	1	10	2007	1	0	0	0	0	0	0	0	0	0	0	0	0		2	1	0	0	NO RED	0
1020	1	10	2007	1	0	0	0	0	0	0	0	0	0	0	0	0		2	1	0	0	NO RED	0
1021	1	10	2007	1	0	0	0	0	0	0	0	0	0	0	0	0		2	1	0	0	NO RED	0
1022	1	10	2007	1	0	0	0	0	0	0	0	0	0	0	0	0		2	1	0	0	NO RED	0
1023	1	10	2007	1	0	0	0	0	0	0	0	0	0	0	0	0		2	1	0	0	NO RED	0
1024	1	10	2007	1	0	0	0	0	0	0	0	0	0	0	0	0		2	1	0	0	NO RED	0
1025	1	10	2007	1	0	0	0	0	0	0	0	0	0	0	0	0		2	1	0	0	NO RED	0
1026	1	10	2007	1	0	0	0	0	0	0	0	0	0	0	0	0		2	1	0	0	NO RED	0
1027	1	10	2007	1	0	0	0	0	0	0	0	0	0	0	0	0		2	1	0	0	NO RED	0
1028	1	10	2007	1	0	0	0	0	0	0	0	0	0	0	0	0		2	1	0	0	NO RED	0
1029	1	10	2007	1	0	0	0	0	0	0	0	0	0	0	0	0		2	1	0	0	NO RED	0
1030	1	10	2007	1	0	0	0	0	0	0	0	0	0	0	0	0		2	1	0	0	NO RED	0
1031	1	10	2007	1	0	0	0	0	0	0	0	0	0	0	0	0		2	1	0	0	NO RED	0
1032	1	10	2007	1	0	0	0	0	0	0	0	0	0	0	0	0		2	1	0	0	NO RED	0
1033	1	10	2007	1	0	0	0	0	0	0	0	0	0	0	0	0		2	1	0	0	NO RED	0
1034	1	10	2007	1	0	0	0	0	0	0	0	0	0	0	0	0		2	1	0	0	NO RED	0
1035	1	10	2007	1	0	0	0	0	0	0	0	0	0	0	0	0		2	1	0	0	NO RED	0
1036	1	10	2007	1	0	0	0	0	0	0	0	0	0	0	0	0		2	1	0	0	NO RED	0
1037	1	10	2007	1	0	0	0	0	0	0	0	0	0	0	0	0		2	1	0	0	NO RED	0
1038	1	10	2007	1	0	0	0	0	0	0	0	0	0	0	0	0		2	1	0	0	NO RED	0
1039	1	10	2007	1	0	0	0	0	0	0	0	0	0	0	0	0		2	1	0	0	NO RED	0
1040	1	10	2007	1	0	0	0	0	0	0	0	0	0	0	0	0		2	1	0	0	NO RED	0
1041	1	10	2007	1	0	0	0	0	0	0	0	0	0	0	0	0		2	1	0	0	NO RED	0
1042	1	10	2007	1	0	0	0	0	0	0	0	0	0	0	0	0		2	1	0	0	NO RED	0
1043	1	10	2007	1	0	0	0	0	0	0	0	0	0	0	0	0		2	1	0	0	NO RED	0
1044	1	10	2007	1	0	0	0	0	0	0	0	0	0	0	0	0		2	1	0	0	NO RED	0
1045	1	10	2007	1	0	0	0	0	0	0	0	0	0	0	0	0		2	1	0	0	NO RED	0
1046	1	10	2007	1	0	0	0	0	0	0	0	0	0	0	0	0		2	1	0	0	NO RED	0
1047	1	10	2007	1	0	0	0	0	0	0	0	0	0	0	0	0		2	1	0	0	NO RED	0
1048	1	10	2007	1	0	0	0	0	0	0	0	0	0	0	0	0		2	1	0	0	NO RED	0
1049	1	10	2007	1	0	0	0	0	0	0	0	0	0	0	0	0		2	1	0	0	NO RED	0
1050	1	10	2007	1	0	0	0	0	0	0	0	0	0	0	0	0		2	1	0	0	NO RED	0
1051	1	10	2007	1	0	0	0	0	0	0	0	0	0	0	0	0		2	1	0	0	NO RED	0
1052	1	10	2007	1	0	0	0	0	0	0	0	0	0	0	0	0		2	1	0	0	NO RED	0
1053	1	10	2007	1	0	0	0	0	0	0	0	0	0	0	0	0		2	1	0	0	NO RED	0
1054	1	10	2007	1	0	0	0	0	0	0	0	0	0	0	0	0		2	1	0	0	NO RED	0
1055	1	10	2007	1	0	0	0	0	0	0	0	0	0	0	0	0		2	1	0	0	NO RED	0
1056	1	10	2007	1	0	0	0	0	0	0	0	0	0	0	0	0		2	1	0	0	NO RED	0
1057	1	10	2007	1	0	0	0	0	0	0	0	0	0	0	0	0		2	1	0	0	NO RED	0
1058	1	10	2007	1	0	0	0	0	0	0	0	0	0	0	0	0		2	1	0	0	NO RED	0
1059	1	10	2007	1	0	0	0	0	0	0	0	0	0	0	0	0		2	1	0	0	NO RED	0
1060	1	10	2007	1	0	0	0	0	0	0	0	0	0	0	0	0		2	1	0	0	NO RED	0
1061	1	10	2007	1	0	0	0	0	0	0	0	0	0	0	0	0		2	1	0	0	NO RED	0
1062	1	10	2007	1	0	0	0	0	0	0	0	0	0	0	0	0		2	1	0	0	NO RED	0
1063	1	10	2007	1	0	0	0	0	0	0	0	0	0	0	0	0		2	1	0	0	NO RED	0
1064	1	10	2007	1	0	0	0	0	0	0	0	0	0	0	0	0		2	1	0	0	NO RED	0
1065	1	10	2007	1	0	0	0	0	0	0	0	0	0	0	0	0		2	1	0	0	NO RED	0
1066	1	10	2007	1	0	0	0	0	0	0	0	0	0	0	0	0		2	1	0	0	NO RED	0
1067	1	10	2007	1	0	0	0	0	0	0	0	0	0	0	0	0		2	1	0	0	NO RED	0
1068	1	10	2007	1	0	0	0	0	0	0	0	0	0	0	0	0		2	1	0	0	NO RED	0
1069	1	10	2007	1	0	0	0	0	0	0	0	0	0	0	0	0		2	1	0	0	NO RED	0
1070	1	10	2007	1	0	0	0	0	0	0	0	0	0	0	0	0		2	1	0	0	NO RED	0
1071	1	10	2007	1	0	0	0	0	0	0	0	0	0	0	0	0		2	1	0	0	NO RED	0
1072	1	10	2007	1	0	0	0	0	0	0	0	0	0	0	0	0		2	1	0	0	NO RED	0
1073	1	10	2007	1	0	0	0	0	0	0	0	0	0	0	0	0		2	1	0	0	NO RED	0
1074	1	10	2007	1	0	0	0	0	0	0	0	0	0	0	0	0		2	1	0	0	NO RED	0
1075	1	10	2007	1	0	0	0	0	0	0	0	0	0	0	0	0		2	1	0	0	NO RED	0
1076	1	10	2007	1	0	0	0	0	0	0	0	0	0	0	0	0		2	1	0	0	NO RED	0
1077	1	10	2007	1	0	0	0	0	0	0	0	0	0	0	0	0		2	1	0	0	NO RED	0
1078	1	10	2007	1	0	0	0	0	0	0	0	0	0	0	0	0		2	1	0	0	NO RED	0
1079	1	10	2007	1	0	0	0	0	0	0	0	0	0	0	0	0		2	1	0	0	NO RED	0
1080	1	10	2007	1	0	0	0	0	0	0	0	0	0	0	0	0		2	1	0	0	NO RED	0
1081	1	10	2007	1	0	0	0	0	0	0	0	0	0	0	0	0		2	1	0	0	NO RED	0
1082	1	10	2007	1	0	0	0	0	0	0	0	0	0	0	0	0		2	1	0	0	NO RED	0
1083	1	10	2007	1	0	0	0	0	0	0	0	0	0	0	0	0		2	1	0	0	NO RED	0
1084	1	10	2007	1	0	0	0	0	0	0	0	0	0	0	0	0		2	1	0	0	NO RED	0
1085	1	10	2007	1	0	0	0	0	0	0	0	0	0	0	0	0		2	1	0	0	NO RED	0
1086	1	10	2007	1	0	0	0	0	0	0	0	0	0	0	0	0		2	1	0	0	NO RED	0
1087	1	10	2007	1	0	0	0	0	0	0	0	0	0	0	0	0		2	1	0	0	NO RED	0
1088	1	10	2007	1	0	0	0	0	0	0	0	0	0	0	0	0		2	1	0	0	NO RED	0
1089	1	10	2007	1	0	0	0	0	0	0	0	0	0	0	0	0		2	1	0	0	NO RED	0
1090	1	10	2007	1	0	0	0	0	0	0	0	0	0	0	0	0		2	1	0	0	NO RED	0
1091	1	10	2007	1	0	0	0	0	0	0	0	0	0	0	0	0		2	1	0	0	NO RED	0
1092	1	10	2007	1	0	0	0	0	0	0	0	0	0	0	0	0		2	1	0	0	NO RED	0
1093	1	10	2007	1	0	0	0	0	0	0	0	0	0	0	0	0		2	1	0	0	NO RED	0
1094	1	10	2007	1	0	0	0	0	0	0	0	0	0	0	0	0		2	1	0	0	NO RED	0
1095	1	10	2007	1	0	0	0	0	0	0	0	0	0	0	0	0		2	1	0	0	NO RED	0
1096	1	10	2007	1	0	0	0	0	0	0	0	0	0	0	0	0		2	1	0	0	NO RED	0
1097	1	10	2007	1	0	0	0	0	0	0	0	0	0	0	0	0		2	1	0	0	NO RED	0
1098	1	10	2007	1	0	0	0	0	0	0	0	0	0	0	0	0		2	1	0	0	NO RED	0
1099	1	10	2007	1	0	0	0	0	0	0	0	0	0	0	0	0		2	1	0	0	NO RED	0
1100	1	10	2007	1	0	0	0	0	0	0	0	0	0	0	0	0		2	1	0	0	NO RED	0
1101	1	10	2007	1	0	0	0	0	0	0	0	0	0	0	0	0		2	1	0	0	NO RED	0
1102	1	10	2007	1	0	0	0	0	0	0	0	0	0	0	0	0		2	1	0	0	NO RED	0
1103	1	10	2007	1	0	0	0	0	0	0	0	0	0	0	0	0		2	1	0	0	NO RED	0
1104	1	10	2007	1	0	0	0	0	0	0	0	0	0	0	0	0		2	1	0	0	NO RED	0
1105	1	10	2007	1	0	0	0	0	0	0	0	0	0	0	0	0		2	1	0	0	NO RED	0
1106	1	10	2007	1	0	0	0	0	0	0	0	0	0	0	0	0		2	1	0	0	NO RED	0
1107	1	10	2007	1	0	0	0	0	0	0	0	0	0	0	0	0		2	1	0	0	NO RED	0
1108	1	10	2007	1	0	0	0	0	0	0	0	0	0	0	0	0		2	1	0	0	NO RED	0
1109	1	10	2007	1	0	0	0	0	0	0	0	0	0	0	0	0		2	1	0	0	NO RED	0
1110	1	10	2007	1	0	0	0	0	0	0	0	0	0	0	0	0		2	1	0	0	NO RED	0
1111	1	10	2007	1	0	0	0	0	0	0	0	0	0	0	0	0		2	1	0	0	NO RED	0
1112	1	10	2007	1	0	0	0	0	0	0	0	0	0	0	0	0		2	1	0	0	NO RED	0
1113	1	10	2007	1	0	0	0	0	0	0	0	0	0	0	0	0		2	1	0	0	NO RED	0
1114	1	10	2007	1	0	0	0	0	0	0	0	0	0	0	0	0		2	1	0	0	NO RED	0
1115	1	10	2007	1	0	0	0	0	0	0	0	0	0	0	0	0		2	1	0	0	NO RED	0
1116	1	10	2007	1	0	0	0	0	0	0	0	0	0	0	0	0		2	1	0	0	NO RED	0
1117	1	10	2007	1	0	0	0	0	0	0	0	0	0	0	0	0		2	1	0	0	NO RED	0
1118	1	10	2007	1	0	0	0	0	0	0	0	0	0	0	0	0		2	1	0	0	NO RED	0
1119	1	10	2007	1	0	0	0	0	0	0	0	0	0	0	0	0		2	1	0	0	NO RED	0
1120	1	10	2007	1	0	0	0	0	0	0	0	0	0	0	0	0		2	1	0	0	NO RED	0
1121	1	10	2007	1	0	0	0	0	0	0	0	0	0	0	0	0		2	1	0	0	NO RED	0
1122	1	10	2007	1	0	0	0	0	0	0	0	0	0	0	0	0		2	1	0	0	NO RED	0
1123	1	10	2007	1	0	0	0	0	0	0	0	0	0	0	0	0		2	1	0	0	NO RED	0
1124	1	10	2007	1	0	0	0	0	0	0	0	0	0	0	0	0		2	1	0	0	NO RED	0
1125	1	10	2007	1	0	0	0	0	0	0	0	0	0	0	0	0		2	1	0	0	NO RED	0
1126	1	10	2007	1	0	0	0	0	0	0	0	0	0	0	0	0		2	1	0	0	NO RED	0
1127	1	10	2007	1	0	0	0	0	0	0	0	0	0	0	0	0		2	1	0	0	NO RED	0
1128	1	10	2007	1	0	0	0	0	0	0	0	0	0	0	0	0		2	1	0	0	NO RED	0
1129	1	10	2007	1	0	0	0	0	0	0	0	0	0	0	0	0		2	1	0	0	NO RED	0
1130	1	10	2007	1	0	0	0	0	0	0	0	0	0	0	0	0		2	1	0	0	NO RED	0
1131	1	10	2007	1	0	0	0	0	0	0	0	0	0	0	0	0		2	1	0	0	NO RED	0
1132	1	10	2007	1	0	0	0	0	0	0	0	0	0	0	0	0		2	1	0	0	NO RED	0
1133	1	10	2007	1	0	0	0	0	0	0	0	0	0	0	0	0		2	1	0	0	NO RED	0
1134	1	10	2007	1	0	0	0	0	0	0	0	0	0	0	0	0		2	1	0	0	NO RED	0
1135	1	10	2007	1	0	0	0	0	0	0	0	0	0	0	0	0		2	1	0	0	NO RED	0
1136	1	10	2007	1	0	0	0	0	0	0	0	0	0	0	0	0		2	1	0	0	NO RED	0
1137	1	10	2007	1	0	0	0	0	0	0	0	0	0	0	0	0		2	1	0	0	NO RED	0
1138	1	10	2007	1	0	0	0	0	0	0	0	0	0	0	0	0		2	1	0	0	NO RED	0
1139	1	10	2007	1	0	0	0	0	0	0	0	0	0	0	0	0		2	1	0	0	NO RED	0
1140	1	10	2007	1	0	0	0	0	0	0	0	0	0	0	0	0		2	1	0	0	NO RED	0
1141	1	10	2007	1	0	0	0	0	0	0	0	0	0	0	0	0		2	1	0	0	NO RED	0
1142	1	10	2007	1	0	0	0	0	0	0	0	0	0	0	0	0		2	1	0	0	NO RED	0
1143	1	10	2007	1	0	0	0	0	0	0	0	0	0	0	0	0		2	1	0	0	NO RED	0
1144	1	10	2007	1	0	0	0	0	0	0	0	0	0	0	0	0		2	1	0	0	NO RED	0
1145	1	10	2007	1	0	0	0	0	0	0	0	0	0	0	0	0		2	1	0	0	NO RED	0
1146	1	10	2007	1	0	0	0	0	0	0	0	0	0	0	0	0		2	1	0	0	NO RED	0
1147	1	10	2007	1	0	0	0	0	0	0	0	0	0	0	0	0		2	1	0	0	NO RED	0
1148	1	10	2007	1	0	0	0	0	0	0	0	0	0	0	0	0		2	1	0	0	NO RED	0
1149	1	10	2007	1	0	0	0	0	0	0	0	0	0	0	0	0		2	1	0	0	NO RED	0
1150	1	10	2007	1	0	0	0	0	0	0	0	0	0	0	0	0		2	1	0	0	NO RED	0
1151	1	10	2007	1	0	0	0	0	0	0	0	0	0	0	0	0		2	1	0	0	NO RED	0
1152	1	10	2007	1	0	0	0	0	0	0	0	0	0	0	0	0		2	1	0	0	NO RED	0
1153	1	10	2007	1	0	0	0	0	0	0	0	0	0	0	0	0		2	1	0	0	NO RED	0
1154	1	10	2007	1	0	0	0	0	0	0	0	0	0	0	0	0		2	1	0	0	NO RED	0
1155	1	10	2007	1	0	0	0	0	0	0	0	0	0	0	0	0		2	1	0	0	NO RED	0
1156	1	10	2007	1	0	0	0	0	0	0	0	0	0	0	0	0		2	1	0	0	NO RED	0
1157	1	10	2007	1	0	0	0	0	0	0	0	0	0	0	0	0		2	1	0	0	NO RED	0
1158	1	10	2007	1	0	0	0	0	0	0	0	0	0	0	0	0		2	1	0	0	NO RED	0
1159	1	10	2007	1	0	0	0	0	0	0	0	0	0	0	0	0		2	1	0	0	NO RED	0
1160	1	10	2007	1	0	0	0	0	0	0	0	0	0	0	0	0		2	1	0	0	NO RED	0
1161	1	10	2007	1	0	0	0	0	0	0	0	0	0	0	0	0		2	1	0	0	NO RED	0
1162	1	10	2007	1	0	0	0	0	0	0	0	0	0	0	0	0		2	1	0	0	NO RED	0
1163	1	10	2007	1	0	0	0	0	0	0	0	0	0	0	0	0		2	1	0	0	NO RED	0
1164	1	10	2007	1	0	0	0	0	0	0	0	0	0	0	0	0		2	1	0	0	NO RED	0
1165	1	10	2007	1	0	0	0	0	0	0	0	0	0	0	0	0		2	1	0	0	NO RED	0
1166	1	10	2007	1	0	0	0	0	0	0	0	0	0	0	0	0		2	1	0	0	NO RED	0
1167	1	10	2007	1	0	0	0	0	0	0	0	0	0	0	0	0		2	1	0	0	NO RED	0
1168	1	10	2007	1	0	0	0	0	0	0	0	0	0	0	0	0		2	1	0	0	NO RED	0
1169	1	10	2007	1	0	0	0	0	0	0	0	0	0	0	0	0		2	1	0	0	NO RED	0
1170	1	10	2007	1	0	0	0	0	0	0	0	0	0	0	0	0		2	1	0	0	NO RED	0
1171	1	10	2007	1	0	0	0	0	0	0	0	0	0	0	0	0		2	1	0	0	NO RED	0
1172	1	10	2007	1	0	0	0	0	0	0	0	0	0	0	0	0		2	1	0	0	NO RED	0
1173	1	10	2007	1	0	0	0	0	0	0	0	0	0	0	0	0		2	1	0	0	NO RED	0
1174	1	10	2007	1	0	0	0	0	0	0	0	0	0	0	0	0		2	1	0	0	NO RED	0
1175	1	10	2007	1	0	0	0	0	0	0	0	0	0	0	0	0		2	1	0	0	NO RED	0
1176	1	10	2007	1	0	0	0	0	0	0	0	0	0	0	0	0		2	1	0	0	NO RED	0
1177	1	10	2007	1	0	0	0	0	0	0	0	0	0	0	0	0		2	1	0	0	NO RED	0
1178	1	10	2007	1	0	0	0	0	0	0	0	0	0	0	0	0		2	1	0	0	NO RED	0
1179	1	10	2007	1	0	0	0	0	0	0	0	0	0	0	0	0		2	1	0	0	NO RED	0
1180	1	10	2007	1	0	0	0	0	0	0	0	0	0	0	0	0		2	1	0	0	NO RED	0
1181	1	10	2007	1	0	0	0	0	0	0	0	0	0	0	0	0		2	1	0	0	NO RED	0
1182	1	10	2007	1	0	0	0	0	0	0	0	0	0	0	0	0		2	1	0	0	NO RED	0
1183	1	10	2007	1	0	0	0	0	0	0	0	0	0	0	0	0		2	1	0	0	NO RED	0
1184	1	10	2007	1	0	0	0	0	0	0	0	0	0	0	0	0		2	1	0	0	NO RED	0
1185	1	10	2007	1	0	0	0	0	0	0	0	0	0	0	0	0		2	1	0	0	NO RED	0
1186	1	10	2007	1	0	0	0	0	0	0	0	0	0	0	0	0		2	1	0	0	NO RED	0
1187	1	10	2007	1	0	0	0	0	0	0	0	0	0	0	0	0		2	1	0	0	NO RED	0
1188	1	10	2007	1	0	0	0	0	0	0	0	0	0	0	0	0		2	1	0	0	NO RED	0
1189	1	10	2007	1	0	0	0	0	0	0	0	0	0	0	0	0		2	1	0	0	NO RED	0
1190	1	10	2007	1	0	0	0	0	0	0	0	0	0	0	0	0		2	1	0	0	NO RED	0
1191	1	10	2007	1	0	0	0	0	0	0	0	0	0	0	0	0		2	1	0	0	NO RED	0
1192	1	10	2007	1	0	0	0	0	0	0	0	0	0	0	0	0		2	1	0	0	NO RED	0
1193	1	10	2007	1	0	0	0	0	0	0	0	0	0	0	0	0		2	1	0	0	NO RED	0
1194	1	10	2007	1	0	0	0	0	0	0	0	0	0	0	0	0		2	1	0	0	NO RED	0
1195	1	10	2007	1	0	0	0	0	0	0	0	0	0	0	0	0		2	1	0	0	NO RED	0
1196	1	10	2007	1	0	0	0	0	0	0	0	0	0	0	0	0		2	1	0	0	NO RED	0
1197	1	10	2007	1	0	0	0	0	0	0	0	0	0	0	0	0		2	1	0	0	NO RED	0
1198	1	10	2007	1	0	0	0	0	0	0	0	0	0	0	0	0		2	1	0	0	NO RED	0
1199	1	10	2007	1	0	0	0	0	0	0	0	0	0	0	0	0		2	1	0	0	NO RED	0
1200	1	10	2007	1	0	0	0	0	0	0	0	0	0	0	0	0		2	1	0	0	NO RED	0
1201	1	10	2007	1	0	0	0	0	0	0	0	0	0	0	0	0		2	1	0	0	NO RED	0
1202	1	10	2007	1	0	0	0	0	0	0	0	0	0	0	0	0		2	1	0	0	NO RED	0
1203	1	10	2007	1	0	0	0	0	0	0	0	0	0	0	0	0		2	1	0	0	NO RED	0
1204	1	10	2007	1	0	0	0	0	0	0	0	0	0	0	0	0		2	1	0	0	NO RED	0
1205	1	10	2007	1	0	0	0	0	0	0	0	0	0	0	0	0		2	1	0	0	NO RED	0
1206	1	10	2007	1	0	0	0	0	0	0	0	0	0	0	0	0		2	1	0	0	NO RED	0
1207	1	10	2007	1	0	0	0	0	0	0	0	0	0	0	0	0		2	1	0	0	NO RED	0
1208	1	10	2007	1	0	0	0	0	0	0	0	0	0	0	0	0		2	1	0	0	NO RED	0
1209	1	10	2007	1	0	0	0	0	0	0	0	0	0	0	0	0		2	1	0	0	NO RED	0
1210	1	10	2007	1	0	0	0	0	0	0	0	0	0	0	0	0		2	1	0	0	NO RED	0
1211	1	10	2007	1	0	0	0	0	0	0	0	0	0	0	0	0		2	1	0	0	NO RED	0
1212	1	10	2007	1	0	0	0	0	0	0	0	0	0	0	0	0		2	1	0	0	NO RED	0
1213	1	10	2007	1	0	0	0	0	0	0	0	0	0	0	0	0		2	1	0	0	NO RED	0
1214	1	10	2007	1	0	0	0	0	0	0	0	0	0	0	0	0		2	1	0	0	NO RED	0
1215	1	10	2007	1	0	0	0	0	0	0	0	0	0	0	0	0		2	1	0	0	NO RED	0
1216	1	10	2007	1	0	0	0	0	0	0	0	0	0	0	0	0		2	1	0	0	NO RED	0
1217	1	10	2007	1	0	0	0	0	0	0	0	0	0	0	0	0		2	1	0	0	NO RED	0
1218	1	10	2007	1	0	0	0	0	0	0	0	0	0	0	0	0		2	1	0	0	NO RED	0
1219	1	10	2007	1	0	0	0	0	0	0	0	0	0	0	0	0		2	1	0	0	NO RED	0
1220	1	10	2007	1	0	0	0	0	0	0	0	0	0	0	0	0		2	1	0	0	NO RED	0
1221	1	10	2007	1	0	0	0	0	0	0	0	0	0	0	0	0		2	1	0	0	NO RED	0
1222	1	10	2007	1	0	0	0	0	0	0	0	0	0	0	0	0		2	1	0	0	NO RED	0
1223	1	10	2007	1	0	0	0	0	0	0	0	0	0	0	0	0		2	1	0	0	NO RED	0
1224	1	10	2007	1	0	0	0	0	0	0	0	0	0	0	0	0		2	1	0	0	NO RED	0
1225	1	10	2007	1	0	0	0	0	0	0	0	0	0	0	0	0		2	1	0	0	NO RED	0
1226	1	10	2007	1	0	0	0	0	0	0	0	0	0	0	0	0		2	1	0	0	NO RED	0
1227	1	10	2007	1	0	0	0	0	0	0	0	0	0	0	0	0		2	1	0	0	NO RED	0
1228	1	10	2007	1	0	0	0	0	0	0	0	0	0	0	0	0		2	1	0	0	NO RED	0
1229	1	10	2007	1	0	0	0	0	0	0	0	0	0	0	0	0		2	1	0	0	NO RED	0
1230	1	10	2007	1	0	0	0	0	0	0	0	0	0	0	0	0		2	1	0	0	NO RED	0
1231	1	10	2007	1	0	0	0	0	0	0	0	0	0	0	0	0		2	1	0	0	NO RED	0
1232	1	10	2007	1	0	0	0	0	0	0	0	0	0	0	0	0		2	1	0	0	NO RED	0
1233	1	10	2007	1	0	0	0	0	0	0	0	0	0	0	0	0		2	1	0	0	NO RED	0
1234	1	10	2007	1	0	0	0	0	0	0	0	0	0	0	0	0		2	1	0	0	NO RED	0
1235	1	10	2007	1	0	0	0	0	0	0	0	0	0	0	0	0		2	1	0	0	NO RED	0
1236	1	10	2007	1	0	0	0	0	0	0	0	0	0	0	0	0		2	1	0	0	NO RED	0
1237	1	10	2007	1	0	0	0	0	0	0	0	0	0	0	0	0		2	1	0	0	NO RED	0
1238	1	10	2007	1	0	0	0	0	0	0	0	0	0	0	0	0		2	1	0	0	NO RED	0
1239	1	10	2007	1	0	0	0	0	0	0	0	0	0	0	0	0		2	1	0	0	NO RED	0
1240	1	10	2007	1	0	0	0	0	0	0	0	0	0	0	0	0		2	1	0	0	NO RED	0
1241	1	10	2007	1	0	0	0	0	0	0	0	0	0	0	0	0		2	1	0	0	NO RED	0
1242	1	10	2007	1	0	0	0	0	0	0	0	0	0	0	0	0		2	1	0	0	NO RED	0
1243	1	10	2007	1	0	0	0	0	0	0	0	0	0	0	0	0		2	1	0	0	NO RED	0
1244	1	10	2007	1	0	0	0	0	0	0	0	0	0	0	0	0		2	1	0	0	NO RED	0
1245	1	10	2007	1	0	0	0	0	0	0	0	0	0	0	0	0		2	1	0	0	NO RED	0
1246	1	10	2007	1	0	0	0	0	0	0	0	0	0	0	0	0		2	1	0	0	NO RED	0
1247	1	10	2007	1	0	0	0	0	0	0	0	0	0	0	0	0		2	1	0	0	NO RED	0
1248	1	10	2007	1	0	0	0	0	0	0	0	0	0	0	0	0		2	1	0	0	NO RED	0
1249	1	10	2007	1	0	0	0	0	0	0	0	0	0	0	0	0		2	1	0	0	NO RED	0
1250	1	10	2007	1	0	0	0	0	0	0	0	0	0	0	0	0		2	1	0	0	NO RED	0
1251	1	10	2007	1	0	0	0	0	0	0	0	0	0	0	0	0		2	1	0	0	NO RED	0
1252	1	10	2007	1	0	0	0	0	0	0	0	0	0	0	0	0		2	1	0	0	NO RED	0
1253	1	10	2007	1	0	0	0	0	0	0	0	0	0	0	0	0		2	1	0	0	NO RED	0
1254	1	10	2007	1	0	0	0	0	0	0	0	0	0	0	0	0		2	1	0	0	NO RED	0
1255	1	10	2007	1	0	0	0	0	0	0	0	0	0	0	0	0		2	1	0	0	NO RED	0
1256	1	10	2007	1	0	0	0	0	0	0	0	0	0	0	0	0		2	1	0	0	NO RED	0
1257	1	10	2007	1	0	0	0	0	0	0	0	0	0	0	0	0		2	1	0	0	NO RED	0
1258	1	10	2007	1	0	0	0	0	0	0	0	0	0	0	0	0		2	1	0	0	NO RED	0
1259	1	10	2007	1	0	0	0	0	0	0	0	0	0	0	0	0		2	1	0	0	NO RED	0
1260	1	10	2007	1	0	0	0	0	0	0	0	0	0	0	0	0		2	1	0	0	NO RED	0
1261	1	10	2007	1	0	0	0	0	0	0	0	0	0	0	0	0		2	1	0	0	NO RED	0
1262	1	10	2007	1	0	0	0	0	0	0	0	0	0	0	0	0		2	1	0	0	NO RED	0
1263	1	10	2007	1	0	0	0	0	0	0	0	0	0	0	0	0		2	1	0	0	NO RED	0
1264	1	10	2007	1	0	0	0	0	0	0	0	0	0	0	0	0		2	1	0	0	NO RED	0
1265	1	10	2007	1	0	0	0	0	0	0	0	0	0	0	0	0		2	1	0	0	NO RED	0
1266	1	10	2007	1	0	0	0	0	0	0	0	0	0	0	0	0		2	1	0	0	NO RED	0
1267	1	10	2007	1	0	0	0	0	0	0	0	0	0	0	0	0		2	1	0	0	NO RED	0
1268	1	10	2007	1	0	0	0	0	0	0	0	0	0	0	0	0		2	1	0	0	NO RED	0
1269	1	10	2007	1	0	0	0	0	0	0	0	0	0	0	0	0		2	1	0	0	NO RED	0
1270	1	10	2007	1	0	0	0	0	0	0	0	0	0	0	0	0		2	1	0	0	NO RED	0
1271	1	10	2007	1	0	0	0	0	0	0	0	0	0	0	0	0		2	1	0	0	NO RED	0
1272	1	10	2007	1	0	0	0	0	0	0	0	0	0	0	0	0		2	1	0	0	NO RED	0
1273	1	10	2007	1	0	0	0	0	0	0	0	0	0	0	0	0		2	1	0	0	NO RED	0
1274	1	10	2007	1	0	0	0	0	0	0	0	0	0	0	0	0		2	1	0	0	NO RED	0
1275	1	10	2007	1	0	0	0	0	0	0	0	0	0	0	0	0		2	1	0	0	NO RED	0
1276	1	10	2007	1	0	0	0	0	0	0	0	0	0	0	0	0		2	1	0	0	NO RED	0
1277	1	10	2007	1	0	0	0	0	0	0	0	0	0	0	0	0		2	1	0	0	NO RED	0
1278	1	10	2007	1	0	0	0	0	0	0	0	0	0	0	0	0		2	1	0	0	NO RED	0
1279	1	10	2007	1	0	0	0	0	0	0	0	0	0	0	0	0		2	1	0	0	NO RED	0
1280	1	10	2007	1	0	0	0	0	0	0	0	0	0	0	0	0		2	1	0	0	NO RED	0
1281	1	10	2007	1	0	0	0	0	0	0	0	0	0	0	0	0		2	1	0	0	NO RED	0
1282	1	10	2007	1	0	0	0	0	0	0	0	0	0	0	0	0		2	1	0	0	NO RED	0
1283	1	10	2007	1	0	0	0	0	0	0	0	0	0	0	0	0		1	1	0	0	NO RED	0
1284	1	10	2007	1	0	0	0	0	0	0	0	0	0	0	0	0		1	1	0	0	NO RED	0
1285	1	10	2007	1	0	0	0	0	0	0	0	0	0	0	0	0		1	1	0	0	NO RED	0
1286	1	10	2007	1	0	0	0	0	0	0	0	0	0	0	0	0		1	1	0	0	NO RED	0
1287	1	10	2007	1	0	0	0	0	0	0	0	0	0	0	0	0		1	1	0	0	NO RED	0
1288	1	10	2007	1	0	0	0	0	0	0	0	0	0	0	0	0		1	1	0	0	NO RED	0
1289	1	10	2007	1	0	0	0	0	0	0	0	0	0	0	0	0		1	1	0	0	NO RED	0
1290	1	10	2007	1	0	0	0	0	0	0	0	0	0	0	0	0		1	1	0	0	NO RED	0
1291	1	10	2007	1	0	0	0	0	0	0	0	0	0	0	0	0		1	1	0	0	NO RED	0
1292	1	10	2007	1	0	0	0	0	0	0	0	0	0	0	0	0		1	1	0	0	NO RED	0
1293	1	10	2007	1	0	0	0	0	0	0	0	0	0	0	0	0		1	1	0	0	NO RED	0
1294	1	10	2007	1	0	0	0	0	0	0	0	0	0	0	0	0		1	1	0	0	NO RED	0
1295	1	10	2007	1	0	0	0	0	0	0	0	0	0	0	0	0		1	1	0	0	NO RED	0
1296	1	10	2007	1	0	0	0	0	0	0	0	0	0	0	0	0		1	1	0	0	NO RED	0
1297	1	10	2007	1	0	0	0	0	0	0	0	0	0	0	0	0		1	1	0	0	NO RED	0
1298	1	10	2007	1	0	0	0	0	0	0	0	0	0	0	0	0		1	1	0	0	NO RED	0
1299	1	10	2007	1	0	0	0	0	0	0	0	0	0	0	0	0		1	1	0	0	NO RED	0
1300	1	10	2007	1	0	0	0	0	0	0	0	0	0	0	0	0		1	1	0	0	NO RED	0
1301	1	10	2007	1	0	0	0	0	0	0	0	0	0	0	0	0		1	1	0	0	NO RED	0
1302	1	10	2007	1	0	0	0	0	0	0	0	0	0	0	0	0		1	1	0	0	NO RED	0
1303	1	10	2007	1	0	0	0	0	0	0	0	0	0	0	0	0		1	1	0	0	NO RED	0
1304	1	10	2007	1	0	0	0	0	0	0	0	0	0	0	0	0		1	1	0	0	NO RED	0
1305	1	10	2007	1	0	0	0	0	0	0	0	0	0	0	0	0		1	1	0	0	NO RED	0
1306	1	10	2007	1	0	0	0	0	0	0	0	0	0	0	0	0		1	1	0	0	NO RED	0
1307	1	10	2007	1	0	0	0	0	0	0	0	0	0	0	0	0		1	1	0	0	NO RED	0
1308	1	10	2007	1	0	0	0	0	0	0	0	0	0	0	0	0		1	1	0	0	NO RED	0
1309	1	10	2007	1	0	0	0	0	0	0	0	0	0	0	0	0		1	1	0	0	NO RED	0
1310	1	10	2007	1	0	0	0	0	0	0	0	0	0	0	0	0		1	1	0	0	NO RED	0
1311	1	10	2007	1	0	0	0	0	0	0	0	0	0	0	0	0		1	1	0	0	NO RED	0
1312	1	10	2007	1	0	0	0	0	0	0	0	0	0	0	0	0		1	1	0	0	NO RED	0
1313	1	10	2007	1	0	0	0	0	0	0	0	0	0	0	0	0		1	1	0	0	NO RED	0
1314	1	10	2007	1	0	0	0	0	0	0	0	0	0	0	0	0		1	1	0	0	NO RED	0
1315	1	10	2007	1	0	0	0	0	0	0	0	0	0	0	0	0		1	1	0	0	NO RED	0
1316	1	10	2007	1	0	0	0	0	0	0	0	0	0	0	0	0		1	1	0	0	NO RED	0
1317	1	10	2007	1	0	0	0	0	0	0	0	0	0	0	0	0		1	1	0	0	NO RED	0
1318	1	10	2007	1	0	0	0	0	0	0	0	0	0	0	0	0		1	1	0	0	NO RED	0
1319	1	10	2007	1	0	0	0	0	0	0	0	0	0	0	0	0		1	1	0	0	NO RED	0
1320	1	10	2007	1	0	0	0	0	0	0	0	0	0	0	0	0		1	1	0	0	NO RED	0
1321	1	10	2007	1	0	0	0	0	0	0	0	0	0	0	0	0		1	1	0	0	NO RED	0
1322	1	10	2007	1	0	0	0	0	0	0	0	0	0	0	0	0		1	1	0	0	NO RED	0
1323	1	10	2007	1	0	0	0	0	0	0	0	0	0	0	0	0		1	1	0	0	NO RED	0
1324	1	10	2007	1	0	0	0	0	0	0	0	0	0	0	0	0		1	1	0	0	NO RED	0
1325	1	10	2007	1	0	0	0	0	0	0	0	0	0	0	0	0		1	1	0	0	NO RED	0
1326	1	10	2007	1	0	0	0	0	0	0	0	0	0	0	0	0		1	1	0	0	NO RED	0
1327	1	10	2007	1	0	0	0	0	0	0	0	0	0	0	0	0		1	1	0	0	NO RED	0
1328	1	10	2007	1	0	0	0	0	0	0	0	0	0	0	0	0		1	1	0	0	NO RED	0
1329	1	10	2007	1	0	0	0	0	0	0	0	0	0	0	0	0		1	1	0	0	NO RED	0
1330	1	10	2007	1	0	0	0	0	0	0	0	0	0	0	0	0		1	1	0	0	NO RED	0
1331	1	10	2007	1	0	0	0	0	0	0	0	0	0	0	0	0		1	1	0	0	NO RED	0
1332	1	10	2007	1	0	0	0	0	0	0	0	0	0	0	0	0		1	1	0	0	NO RED	0
1333	1	10	2007	1	0	0	0	0	0	0	0	0	0	0	0	0		1	1	0	0	NO RED	0
1334	1	10	2007	1	0	0	0	0	0	0	0	0	0	0	0	0		1	1	0	0	NO RED	0
1335	1	10	2007	1	0	0	0	0	0	0	0	0	0	0	0	0		1	1	0	0	NO RED	0
1336	1	10	2007	1	0	0	0	0	0	0	0	0	0	0	0	0		1	1	0	0	NO RED	0
1337	1	10	2007	1	0	0	0	0	0	0	0	0	0	0	0	0		1	1	0	0	NO RED	0
1338	1	10	2007	1	0	0	0	0	0	0	0	0	0	0	0	0		1	1	0	0	NO RED	0
1339	1	10	2007	1	0	0	0	0	0	0	0	0	0	0	0	0		1	1	0	0	NO RED	0
1340	1	10	2007	1	0	0	0	0	0	0	0	0	0	0	0	0		1	1	0	0	NO RED	0
1341	1	10	2007	1	0	0	0	0	0	0	0	0	0	0	0	0		1	1	0	0	NO RED	0
1342	1	10	2007	1	0	0	0	0	0	0	0	0	0	0	0	0		1	1	0	0	NO RED	0
1343	1	10	2007	1	0	0	0	0	0	0	0	0	0	0	0	0		1	1	0	0	NO RED	0
1344	1	10	2007	1	0	0	0	0	0	0	0	0	0	0	0	0		1	1	0	0	NO RED	0
1345	1	10	2007	1	0	0	0	0	0	0	0	0	0	0	0	0		1	1	0	0	NO RED	0
1346	1	10	2007	1	0	0	0	0	0	0	0	0	0	0	0	0		1	1	0	0	NO RED	0
1347	1	10	2007	1	0	0	0	0	0	0	0	0	0	0	0	0		1	1	0	0	NO RED	0
1348	1	10	2007	1	0	0	0	0	0	0	0	0	0	0	0	0		1	1	0	0	NO RED	0
1349	1	10	2007	1	0	0	0	0	0	0	0	0	0	0	0	0		1	1	0	0	NO RED	0
1350	1	10	2007	1	0	0	0	0	0	0	0	0	0	0	0	0		1	1	0	0	NO RED	0
1351	1	10	2007	1	0	0	0	0	0	0	0	0	0	0	0	0		1	1	0	0	NO RED	0
1352	1	10	2007	1	0	0	0	0	0	0	0	0	0	0	0	0		1	1	0	0	NO RED	0
1353	1	10	2007	1	0	0	0	0	0	0	0	0	0	0	0	0		1	1	0	0	NO RED	0
1354	1	10	2007	1	0	0	0	0	0	0	0	0	0	0	0	0		1	1	0	0	NO RED	0
1355	1	10	2007	1	0	0	0	0	0	0	0	0	0	0	0	0		1	1	0	0	NO RED	0
1356	1	10	2007	1	0	0	0	0	0	0	0	0	0	0	0	0		1	1	0	0	NO RED	0
1357	1	10	2007	1	0	0	0	0	0	0	0	0	0	0	0	0		1	1	0	0	NO RED	0
1358	1	10	2007	1	0	0	0	0	0	0	0	0	0	0	0	0		1	1	0	0	NO RED	0
1359	1	10	2007	1	0	0	0	0	0	0	0	0	0	0	0	0		1	1	0	0	NO RED	0
1360	1	10	2007	1	0	0	0	0	0	0	0	0	0	0	0	0		1	1	0	0	NO RED	0
1361	1	10	2007	1	0	0	0	0	0	0	0	0	0	0	0	0		1	1	0	0	NO RED	0
1362	1	10	2007	1	0	0	0	0	0	0	0	0	0	0	0	0		1	1	0	0	NO RED	0
1363	1	10	2007	1	0	0	0	0	0	0	0	0	0	0	0	0		1	1	0	0	NO RED	0
1364	1	10	2007	1	0	0	0	0	0	0	0	0	0	0	0	0		1	1	0	0	NO RED	0
1365	1	10	2007	1	0	0	0	0	0	0	0	0	0	0	0	0		1	1	0	0	NO RED	0
1366	1	10	2007	1	0	0	0	0	0	0	0	0	0	0	0	0		1	1	0	0	NO RED	0
1367	1	10	2007	1	0	0	0	0	0	0	0	0	0	0	0	0		1	1	0	0	NO RED	0
1368	1	10	2007	1	0	0	0	0	0	0	0	0	0	0	0	0		1	1	0	0	NO RED	0
1369	1	10	2007	1	0	0	0	0	0	0	0	0	0	0	0	0		1	1	0	0	NO RED	0
1370	1	10	2007	1	0	0	0	0	0	0	0	0	0	0	0	0		1	1	0	0	NO RED	0
1371	1	10	2007	1	0	0	0	0	0	0	0	0	0	0	0	0		1	1	0	0	NO RED	0
1372	1	10	2007	1	0	0	0	0	0	0	0	0	0	0	0	0		1	1	0	0	NO RED	0
1373	1	10	2007	1	0	0	0	0	0	0	0	0	0	0	0	0		1	1	0	0	NO RED	0
1374	1	10	2007	1	0	0	0	0	0	0	0	0	0	0	0	0		1	1	0	0	NO RED	0
1375	1	10	2007	1	0	0	0	0	0	0	0	0	0	0	0	0		1	1	0	0	NO RED	0
1376	1	10	2007	1	0	0	0	0	0	0	0	0	0	0	0	0		1	1	0	0	NO RED	0
1377	1	10	2007	1	0	0	0	0	0	0	0	0	0	0	0	0		1	1	0	0	NO RED	0
1378	1	10	2007	1	0	0	0	0	0	0	0	0	0	0	0	0		1	1	0	0	NO RED	0
1379	1	10	2007	1	0	0	0	0	0	0	0	0	0	0	0	0		1	1	0	0	NO RED	0
1380	1	10	2007	1	0	0	0	0	0	0	0	0	0	0	0	0		1	1	0	0	NO RED	0
1381	1	10	2007	1	0	0	0	0	0	0	0	0	0	0	0	0		1	1	0	0	NO RED	0
1382	1	10	2007	1	0	0	0	0	0	0	0	0	0	0	0	0		1	1	0	0	NO RED	0
1383	1	10	2007	1	0	0	0	0	0	0	0	0	0	0	0	0		1	1	0	0	NO RED	0
1384	1	10	2007	1	0	0	0	0	0	0	0	0	0	0	0	0		1	1	0	0	NO RED	0
1385	1	10	2007	1	0	0	0	0	0	0	0	0	0	0	0	0		1	1	0	0	NO RED	0
1386	1	10	2007	1	0	0	0	0	0	0	0	0	0	0	0	0		1	1	0	0	NO RED	0
1387	1	10	2007	1	0	0	0	0	0	0	0	0	0	0	0	0		1	1	0	0	NO RED	0
1388	1	10	2007	1	0	0	0	0	0	0	0	0	0	0	0	0		1	1	0	0	NO RED	0
1389	1	10	2007	1	0	0	0	0	0	0	0	0	0	0	0	0		1	1	0	0	NO RED	0
1390	1	10	2007	1	0	0	0	0	0	0	0	0	0	0	0	0		1	1	0	0	NO RED	0
1391	1	10	2007	1	0	0	0	0	0	0	0	0	0	0	0	0		1	1	0	0	NO RED	0
1392	1	10	2007	1	0	0	0	0	0	0	0	0	0	0	0	0		1	1	0	0	NO RED	0
1393	1	10	2007	1	0	0	0	0	0	0	0	0	0	0	0	0		1	1	0	0	NO RED	0
1394	1	10	2007	1	0	0	0	0	0	0	0	0	0	0	0	0		1	1	0	0	NO RED	0
1395	1	10	2007	1	0	0	0	0	0	0	0	0	0	0	0	0		1	1	0	0	NO RED	0
1396	1	10	2007	1	0	0	0	0	0	0	0	0	0	0	0	0		1	1	0	0	NO RED	0
1397	1	10	2007	1	0	0	0	0	0	0	0	0	0	0	0	0		1	1	0	0	NO RED	0
1398	1	10	2007	1	0	0	0	0	0	0	0	0	0	0	0	0		1	1	0	0	NO RED	0
1399	1	10	2007	1	0	0	0	0	0	0	0	0	0	0	0	0		1	1	0	0	NO RED	0
1400	1	10	2007	1	0	0	0	0	0	0	0	0	0	0	0	0		1	1	0	0	NO RED	0
1401	1	10	2007	1	0	0	0	0	0	0	0	0	0	0	0	0		1	1	0	0	NO RED	0
1402	1	10	2007	1	0	0	0	0	0	0	0	0	0	0	0	0		1	1	0	0	NO RED	0
1403	1	10	2007	1	0	0	0	0	0	0	0	0	0	0	0	0		1	1	0	0	NO RED	0
1404	1	10	2007	1	0	0	0	0	0	0	0	0	0	0	0	0		1	1	0	0	NO RED	0
1405	1	10	2007	1	0	0	0	0	0	0	0	0	0	0	0	0		1	1	0	0	NO RED	0
1406	1	10	2007	1	0	0	0	0	0	0	0	0	0	0	0	0		1	1	0	0	NO RED	0
1407	1	10	2007	1	0	0	0	0	0	0	0	0	0	0	0	0		1	1	0	0	NO RED	0
1408	1	10	2007	1	0	0	0	0	0	0	0	0	0	0	0	0		1	1	0	0	NO RED	0
1409	1	10	2007	1	0	0	0	0	0	0	0	0	0	0	0	0		1	1	0	0	NO RED	0
1410	1	10	2007	1	0	0	0	0	0	0	0	0	0	0	0	0		1	1	0	0	NO RED	0
1411	1	10	2007	1	0	0	0	0	0	0	0	0	0	0	0	0		1	1	0	0	NO RED	0
1412	1	10	2007	1	0	0	0	0	0	0	0	0	0	0	0	0		1	1	0	0	NO RED	0
1413	1	10	2007	1	0	0	0	0	0	0	0	0	0	0	0	0		1	1	0	0	NO RED	0
1414	1	10	2007	1	0	0	0	0	0	0	0	0	0	0	0	0		1	1	0	0	NO RED	0
1415	1	10	2007	1	0	0	0	0	0	0	0	0	0	0	0	0		1	1	0	0	NO RED	0
1416	1	10	2007	1	0	0	0	0	0	0	0	0	0	0	0	0		1	1	0	0	NO RED	0
1417	1	10	2007	1	0	0	0	0	0	0	0	0	0	0	0	0		1	1	0	0	NO RED	0
1418	1	10	2007	1	0	0	0	0	0	0	0	0	0	0	0	0		1	1	0	0	NO RED	0
1419	1	10	2007	1	0	0	0	0	0	0	0	0	0	0	0	0		1	1	0	0	NO RED	0
1420	1	10	2007	1	0	0	0	0	0	0	0	0	0	0	0	0		1	1	0	0	NO RED	0
1421	1	10	2007	1	0	0	0	0	0	0	0	0	0	0	0	0		1	1	0	0	NO RED	0
1422	1	10	2007	1	0	0	0	0	0	0	0	0	0	0	0	0		1	1	0	0	NO RED	0
1423	1	10	2007	1	0	0	0	0	0	0	0	0	0	0	0	0		1	1	0	0	NO RED	0
1424	1	10	2007	1	0	0	0	0	0	0	0	0	0	0	0	0		1	1	0	0	NO RED	0
1425	1	10	2007	1	0	0	0	0	0	0	0	0	0	0	0	0		1	1	0	0	NO RED	0
1426	1	10	2007	1	0	0	0	0	0	0	0	0	0	0	0	0		1	1	0	0	NO RED	0
1427	1	10	2007	1	0	0	0	0	0	0	0	0	0	0	0	0		1	1	0	0	NO RED	0
1428	1	10	2007	1	0	0	0	0	0	0	0	0	0	0	0	0		1	1	0	0	NO RED	0
1429	1	10	2007	1	0	0	0	0	0	0	0	0	0	0	0	0		1	1	0	0	NO RED	0
1430	1	10	2007	1	0	0	0	0	0	0	0	0	0	0	0	0		1	1	0	0	NO RED	0
1431	1	10	2007	1	0	0	0	0	0	0	0	0	0	0	0	0		1	1	0	0	NO RED	0
1432	1	10	2007	1	0	0	0	0	0	0	0	0	0	0	0	0		1	1	0	0	NO RED	0
1433	1	10	2007	1	0	0	0	0	0	0	0	0	0	0	0	0		1	1	0	0	NO RED	0
1434	1	10	2007	1	0	0	0	0	0	0	0	0	0	0	0	0		1	1	0	0	NO RED	0
1435	1	10	2007	1	0	0	0	0	0	0	0	0	0	0	0	0		1	1	0	0	NO RED	0
1436	1	10	2007	1	0	0	0	0	0	0	0	0	0	0	0	0		1	1	0	0	NO RED	0
1437	1	10	2007	1	0	0	0	0	0	0	0	0	0	0	0	0		1	1	0	0	NO RED	0
1438	1	10	2007	1	0	0	0	0	0	0	0	0	0	0	0	0		1	1	0	0	NO RED	0
1439	1	10	2007	1	0	0	0	0	0	0	0	0	0	0	0	0		1	1	0	0	NO RED	0
1440	1	10	2007	1	0	0	0	0	0	0	0	0	0	0	0	0		1	1	0	0	NO RED	0
1441	1	10	2007	1	0	0	0	0	0	0	0	0	0	0	0	0		1	1	0	0	NO RED	0
1442	1	10	2007	1	0	0	0	0	0	0	0	0	0	0	0	0		1	1	0	0	NO RED	0
1443	1	10	2007	1	0	0	0	0	0	0	0	0	0	0	0	0		1	1	0	0	NO RED	0
1444	1	10	2007	1	0	0	0	0	0	0	0	0	0	0	0	0		1	1	0	0	NO RED	0
1445	1	10	2007	1	0	0	0	0	0	0	0	0	0	0	0	0		1	1	0	0	NO RED	0
1446	1	10	2007	1	0	0	0	0	0	0	0	0	0	0	0	0		1	1	0	0	NO RED	0
1447	1	10	2007	1	0	0	0	0	0	0	0	0	0	0	0	0		1	1	0	0	NO RED	0
1448	1	10	2007	1	0	0	0	0	0	0	0	0	0	0	0	0		1	1	0	0	NO RED	0
1449	1	10	2007	1	0	0	0	0	0	0	0	0	0	0	0	0		1	1	0	0	NO RED	0
1450	1	10	2007	1	0	0	0	0	0	0	0	0	0	0	0	0		1	1	0	0	NO RED	0
1451	1	10	2007	1	0	0	0	0	0	0	0	0	0	0	0	0		1	1	0	0	NO RED	0
1452	1	10	2007	1	0	0	0	0	0	0	0	0	0	0	0	0		1	1	0	0	NO RED	0
1453	1	10	2007	1	0	0	0	0	0	0	0	0	0	0	0	0		1	1	0	0	NO RED	0
1454	1	10	2007	1	0	0	0	0	0	0	0	0	0	0	0	0		1	1	0	0	NO RED	0
1455	1	10	2007	1	0	0	0	0	0	0	0	0	0	0	0	0		1	1	0	0	NO RED	0
1456	1	10	2007	1	0	0	0	0	0	0	0	0	0	0	0	0		1	1	0	0	NO RED	0
1457	1	10	2007	1	0	0	0	0	0	0	0	0	0	0	0	0		1	1	0	0	NO RED	0
1458	1	10	2007	1	0	0	0	0	0	0	0	0	0	0	0	0		1	1	0	0	NO RED	0
1459	1	10	2007	1	0	0	0	0	0	0	0	0	0	0	0	0		1	1	0	0	NO RED	0
1460	1	10	2007	1	0	0	0	0	0	0	0	0	0	0	0	0		1	1	0	0	NO RED	0
1461	1	10	2007	1	0	0	0	0	0	0	0	0	0	0	0	0		1	1	0	0	NO RED	0
1462	1	10	2007	1	0	0	0	0	0	0	0	0	0	0	0	0		1	1	0	0	NO RED	0
1463	1	10	2007	1	0	0	0	0	0	0	0	0	0	0	0	0		1	1	0	0	NO RED	0
1464	1	10	2007	1	0	0	0	0	0	0	0	0	0	0	0	0		1	1	0	0	NO RED	0
1465	1	10	2007	1	0	0	0	0	0	0	0	0	0	0	0	0		1	1	0	0	NO RED	0
1466	1	10	2007	1	0	0	0	0	0	0	0	0	0	0	0	0		1	1	0	0	NO RED	0
1467	1	10	2007	1	0	0	0	0	0	0	0	0	0	0	0	0		1	1	0	0	NO RED	0
1468	1	10	2007	1	0	0	0	0	0	0	0	0	0	0	0	0		1	1	0	0	NO RED	0
1469	1	10	2007	1	0	0	0	0	0	0	0	0	0	0	0	0		1	1	0	0	NO RED	0
1470	1	10	2007	1	0	0	0	0	0	0	0	0	0	0	0	0		1	1	0	0	NO RED	0
1471	1	10	2007	1	0	0	0	0	0	0	0	0	0	0	0	0		1	1	0	0	NO RED	0
1472	1	10	2007	1	0	0	0	0	0	0	0	0	0	0	0	0		1	1	0	0	NO RED	0
1473	1	10	2007	1	0	0	0	0	0	0	0	0	0	0	0	0		1	1	0	0	NO RED	0
1474	1	10	2007	1	0	0	0	0	0	0	0	0	0	0	0	0		1	1	0	0	NO RED	0
1475	1	10	2007	1	0	0	0	0	0	0	0	0	0	0	0	0		1	1	0	0	NO RED	0
1476	1	10	2007	1	0	0	0	0	0	0	0	0	0	0	0	0		1	1	0	0	NO RED	0
1477	1	10	2007	1	0	0	0	0	0	0	0	0	0	0	0	0		1	1	0	0	NO RED	0
1478	1	10	2007	1	0	0	0	0	0	0	0	0	0	0	0	0		1	1	0	0	NO RED	0
1479	1	10	2007	1	0	0	0	0	0	0	0	0	0	0	0	0		1	1	0	0	NO RED	0
1480	1	10	2007	1	0	0	0	0	0	0	0	0	0	0	0	0		1	1	0	0	NO RED	0
1481	1	10	2007	1	0	0	0	0	0	0	0	0	0	0	0	0		1	1	0	0	NO RED	0
1482	1	10	2007	1	0	0	0	0	0	0	0	0	0	0	0	0		1	1	0	0	NO RED	0
1483	1	10	2007	1	0	0	0	0	0	0	0	0	0	0	0	0		1	1	0	0	NO RED	0
1484	1	10	2007	1	0	0	0	0	0	0	0	0	0	0	0	0		1	1	0	0	NO RED	0
1485	1	10	2007	1	0	0	0	0	0	0	0	0	0	0	0	0		1	1	0	0	NO RED	0
1486	1	10	2007	1	0	0	0	0	0	0	0	0	0	0	0	0		1	1	0	0	NO RED	0
1487	1	10	2007	1	0	0	0	0	0	0	0	0	0	0	0	0		1	1	0	0	NO RED	0
1488	1	10	2007	1	0	0	0	0	0	0	0	0	0	0	0	0		1	1	0	0	NO RED	0
1489	1	10	2007	1	0	0	0	0	0	0	0	0	0	0	0	0		1	1	0	0	NO RED	0
1490	1	10	2007	1	0	0	0	0	0	0	0	0	0	0	0	0		1	1	0	0	NO RED	0
1491	1	10	2007	1	0	0	0	0	0	0	0	0	0	0	0	0		1	1	0	0	NO RED	0
1492	1	10	2007	1	0	0	0	0	0	0	0	0	0	0	0	0		1	1	0	0	NO RED	0
1493	1	10	2007	1	0	0	0	0	0	0	0	0	0	0	0	0		1	1	0	0	NO RED	0
1494	1	10	2007	1	0	0	0	0	0	0	0	0	0	0	0	0		1	1	0	0	NO RED	0
1495	1	10	2007	1	0	0	0	0	0	0	0	0	0	0	0	0		1	1	0	0	NO RED	0
1496	1	10	2007	1	0	0	0	0	0	0	0	0	0	0	0	0		1	1	0	0	NO RED	0
1497	1	10	2007	1	0	0	0	0	0	0	0	0	0	0	0	0		1	1	0	0	NO RED	0
1498	1	10	2007	1	0	0	0	0	0	0	0	0	0	0	0	0		1	1	0	0	NO RED	0
1499	1	11	2007	1	0	1	0	0	0	1	0	0	0	0	2	2	2	1	1	0	0	NO RED	1
1500	1	11	2007	1	0	1	0	0	0	0	0	0	0	0	1	1	1	2	1	0	0	NO RED	1
1501	1	11	2007	1	0	0	0	0	0	1	0	0	0	0	1	1	1	1	1	0	0	NO RED	1
1502	1	11	2007	1	1	0	0	0	0	0	0	0	0	0	1	1	1	1	1	0	0	NO RED	1
1503	1	11	2007	1	0	0	0	0	0	1	0	0	0	0	1	1	1	2	1	0	0	NO RED	1
1504	1	11	2007	1	0	0	0	0	0	1	0	0	0	0	1	1	1	1	1	0	0	NO RED	1
1505	1	11	2007	1	0	1	0	0	0	0	0	0	0	0	1	1	1	2	1	0	0	NO RED	1
1506	1	11	2007	1	0	1	0	0	0	0	0	0	0	0	1	1	1	1	1	0	0	NO RED	1
1507	1	11	2007	1	0	1	0	0	0	0	0	0	0	0	1	1	1	2	1	0	0	NO RED	1
1508	1	11	2007	1	0	0	0	0	0	1	0	0	0	0	1	1	1	2	1	0	0	NO RED	1
1509	1	11	2007	1	0	0	0	0	0	1	0	0	0	0	1	1	1	2	1	0	0	NO RED	1
1510	1	11	2007	1	1	0	0	0	0	0	0	0	0	0	1	1	1	1	1	0	0	NO RED	1
1511	1	11	2007	1	2	0	0	0	0	0	0	0	0	0	2	1	1	2	1	0	0	NO RED	1
1512	1	11	2007	1	0	0	0	0	0	1	0	0	0	0	1	1	1	1	1	0	0	NO RED	1
1513	1	11	2007	1	0	0	0	0	0	1	0	0	0	0	1	1	1	1	1	0	0	NO RED	1
1514	1	11	2007	1	0	1	0	0	0	1	0	0	0	0	2	2	2	2	1	0	0	NO RED	1
1515	1	11	2007	1	0	1	0	0	0	0	0	0	0	0	1	1	1	2	1	0	0	NO RED	1
1516	1	11	2007	1	0	1	0	0	0	0	0	0	0	0	1	1	1	2	1	0	0	NO RED	1
1517	1	11	2007	1	0	0	0	0	0	0	0	0	1	0	1	1	1	1	1	0	0	NO RED	1
1518	1	11	2007	1	0	1	0	0	0	0	0	0	0	0	1	1	1	2	1	0	0	NO RED	1
1519	1	11	2007	1	1	0	0	0	0	0	0	0	0	0	1	1	1	2	1	0	0	NO RED	1
1520	1	11	2007	1	0	0	0	0	0	1	0	0	0	0	1	1	1	1	1	0	0	NO RED	1
1521	1	11	2007	1	0	0	0	0	0	1	0	0	0	0	1	1	1	2	1	0	0	NO RED	1
1522	1	11	2007	1	0	0	0	0	0	1	0	0	0	0	1	1	1	2	1	0	0	NO RED	1
1523	1	11	2007	1	0	0	0	0	0	1	0	0	0	0	1	1	1	2	1	0	0	NO RED	1
1524	1	11	2007	1	0	1	0	0	0	0	0	0	0	0	1	1	1	2	1	0	0	NO RED	1
1525	1	11	2007	1	0	1	0	0	0	0	0	0	0	0	1	1	1	2	1	0	0	NO RED	1
1526	1	11	2007	1	0	0	0	0	0	0	0	0	0	0	0	0		1	1	0	0	NO RED	0
1527	1	11	2007	1	0	0	0	0	0	0	0	0	0	0	0	0		1	1	0	0	NO RED	0
1528	1	11	2007	1	0	0	0	0	0	0	0	0	0	0	0	0		1	1	0	0	NO RED	0
1529	1	11	2007	1	0	0	0	0	0	0	0	0	0	0	0	0		1	1	0	0	NO RED	0
1530	1	11	2007	1	0	0	0	0	0	0	0	0	0	0	0	0		1	1	0	0	NO RED	0
1531	1	11	2007	1	0	0	0	0	0	0	0	0	0	0	0	0		1	1	0	0	NO RED	0
1532	1	11	2007	1	0	0	0	0	0	0	0	0	0	0	0	0		1	1	0	0	NO RED	0
1533	1	11	2007	1	0	0	0	0	0	0	0	0	0	0	0	0		1	1	0	0	NO RED	0
1534	1	11	2007	1	0	0	0	0	0	0	0	0	0	0	0	0		1	1	0	0	NO RED	0
1535	1	11	2007	1	0	0	0	0	0	0	0	0	0	0	0	0		1	1	0	0	NO RED	0
1536	1	11	2007	1	0	0	0	0	0	0	0	0	0	0	0	0		1	1	0	0	NO RED	0
1537	1	11	2007	1	0	0	0	0	0	0	0	0	0	0	0	0		1	1	0	0	NO RED	0
1538	1	11	2007	1	0	0	0	0	0	0	0	0	0	0	0	0		1	1	0	0	NO RED	0
1539	1	11	2007	1	0	0	0	0	0	0	0	0	0	0	0	0		1	1	0	0	NO RED	0
1540	1	11	2007	1	0	0	0	0	0	0	0	0	0	0	0	0		1	1	0	0	NO RED	0
1541	1	11	2007	1	0	0	0	0	0	0	0	0	0	0	0	0		1	1	0	0	NO RED	0
1542	1	11	2007	1	0	0	0	0	0	0	0	0	0	0	0	0		1	1	0	0	NO RED	0
1543	1	11	2007	1	0	0	0	0	0	0	0	0	0	0	0	0		1	1	0	0	NO RED	0
1544	1	11	2007	1	0	0	0	0	0	0	0	0	0	0	0	0		1	1	0	0	NO RED	0
1545	1	11	2007	1	0	0	0	0	0	0	0	0	0	0	0	0		1	1	0	0	NO RED	0
1546	1	11	2007	1	0	0	0	0	0	0	0	0	0	0	0	0		1	1	0	0	NO RED	0
1547	1	11	2007	1	0	0	0	0	0	0	0	0	0	0	0	0		1	1	0	0	NO RED	0
1548	1	11	2007	1	0	0	0	0	0	0	0	0	0	0	0	0		1	1	0	0	NO RED	0
1549	1	11	2007	1	0	0	0	0	0	0	0	0	0	0	0	0		1	1	0	0	NO RED	0
1550	1	11	2007	1	0	0	0	0	0	0	0	0	0	0	0	0		1	1	0	0	NO RED	0
1551	1	11	2007	1	0	0	0	0	0	0	0	0	0	0	0	0		1	1	0	0	NO RED	0
1552	1	11	2007	1	0	0	0	0	0	0	0	0	0	0	0	0		1	1	0	0	NO RED	0
1553	1	11	2007	1	0	0	0	0	0	0	0	0	0	0	0	0		1	1	0	0	NO RED	0
1554	1	11	2007	1	0	0	0	0	0	0	0	0	0	0	0	0		1	1	0	0	NO RED	0
1555	1	11	2007	1	0	0	0	0	0	0	0	0	0	0	0	0		1	1	0	0	NO RED	0
1556	1	11	2007	1	0	0	0	0	0	0	0	0	0	0	0	0		1	1	0	0	NO RED	0
1557	1	11	2007	1	0	0	0	0	0	0	0	0	0	0	0	0		1	1	0	0	NO RED	0
1558	1	11	2007	1	0	0	0	0	0	0	0	0	0	0	0	0		1	1	0	0	NO RED	0
1559	1	11	2007	1	0	0	0	0	0	0	0	0	0	0	0	0		1	1	0	0	NO RED	0
1560	1	11	2007	1	0	0	0	0	0	0	0	0	0	0	0	0		1	1	0	0	NO RED	0
1561	1	11	2007	1	0	0	0	0	0	0	0	0	0	0	0	0		1	1	0	0	NO RED	0
1562	1	11	2007	1	0	0	0	0	0	0	0	0	0	0	0	0		1	1	0	0	NO RED	0
1563	1	11	2007	1	0	0	0	0	0	0	0	0	0	0	0	0		1	1	0	0	NO RED	0
1564	1	11	2007	1	0	0	0	0	0	0	0	0	0	0	0	0		1	1	0	0	NO RED	0
1565	1	11	2007	1	0	0	0	0	0	0	0	0	0	0	0	0		1	1	0	0	NO RED	0
1566	1	11	2007	1	0	0	0	0	0	0	0	0	0	0	0	0		1	1	0	0	NO RED	0
1567	1	11	2007	1	0	0	0	0	0	0	0	0	0	0	0	0		1	1	0	0	NO RED	0
1568	1	11	2007	1	0	0	0	0	0	0	0	0	0	0	0	0		1	1	0	0	NO RED	0
1569	1	11	2007	1	0	0	0	0	0	0	0	0	0	0	0	0		1	1	0	0	NO RED	0
1570	1	11	2007	1	0	0	0	0	0	0	0	0	0	0	0	0		1	1	0	0	NO RED	0
1571	1	11	2007	1	0	0	0	0	0	0	0	0	0	0	0	0		1	1	0	0	NO RED	0
1572	1	11	2007	1	0	0	0	0	0	0	0	0	0	0	0	0		1	1	0	0	NO RED	0
1573	1	11	2007	1	0	0	0	0	0	0	0	0	0	0	0	0		1	1	0	0	NO RED	0
1574	1	11	2007	1	0	0	0	0	0	0	0	0	0	0	0	0		1	1	0	0	NO RED	0
1575	1	11	2007	1	0	0	0	0	0	0	0	0	0	0	0	0		1	1	0	0	NO RED	0
1576	1	11	2007	1	0	0	0	0	0	0	0	0	0	0	0	0		1	1	0	0	NO RED	0
1577	1	11	2007	1	0	0	0	0	0	0	0	0	0	0	0	0		1	1	0	0	NO RED	0
1578	1	11	2007	1	0	0	0	0	0	0	0	0	0	0	0	0		1	1	0	0	NO RED	0
1579	1	11	2007	1	0	0	0	0	0	0	0	0	0	0	0	0		1	1	0	0	NO RED	0
1580	1	11	2007	1	0	0	0	0	0	0	0	0	0	0	0	0		1	1	0	0	NO RED	0
1581	1	11	2007	1	0	0	0	0	0	0	0	0	0	0	0	0		1	1	0	0	NO RED	0
1582	1	11	2007	1	0	0	0	0	0	0	0	0	0	0	0	0		1	1	0	0	NO RED	0
1583	1	11	2007	1	0	0	0	0	0	0	0	0	0	0	0	0		1	1	0	0	NO RED	0
1584	1	11	2007	1	0	0	0	0	0	0	0	0	0	0	0	0		1	1	0	0	NO RED	0
1585	1	11	2007	1	0	0	0	0	0	0	0	0	0	0	0	0		1	1	0	0	NO RED	0
1586	1	11	2007	1	0	0	0	0	0	0	0	0	0	0	0	0		1	1	0	0	NO RED	0
1587	1	11	2007	1	0	0	0	0	0	0	0	0	0	0	0	0		1	1	0	0	NO RED	0
1588	1	11	2007	1	0	0	0	0	0	0	0	0	0	0	0	0		1	1	0	0	NO RED	0
1589	1	11	2007	1	0	0	0	0	0	0	0	0	0	0	0	0		1	1	0	0	NO RED	0
1590	1	11	2007	1	0	0	0	0	0	0	0	0	0	0	0	0		1	1	0	0	NO RED	0
1591	1	11	2007	1	0	0	0	0	0	0	0	0	0	0	0	0		1	1	0	0	NO RED	0
1592	1	11	2007	1	0	0	0	0	0	0	0	0	0	0	0	0		1	1	0	0	NO RED	0
1593	1	11	2007	1	0	0	0	0	0	0	0	0	0	0	0	0		1	1	0	0	NO RED	0
1594	1	11	2007	1	0	0	0	0	0	0	0	0	0	0	0	0		1	1	0	0	NO RED	0
1595	1	11	2007	1	0	0	0	0	0	0	0	0	0	0	0	0		1	1	0	0	NO RED	0
1596	1	11	2007	1	0	0	0	0	0	0	0	0	0	0	0	0		1	1	0	0	NO RED	0
1597	1	11	2007	1	0	0	0	0	0	0	0	0	0	0	0	0		1	1	0	0	NO RED	0
1598	1	11	2007	1	0	0	0	0	0	0	0	0	0	0	0	0		1	1	0	0	NO RED	0
1599	1	11	2007	1	0	0	0	0	0	0	0	0	0	0	0	0		1	1	0	0	NO RED	0
1600	1	11	2007	1	0	0	0	0	0	0	0	0	0	0	0	0		1	1	0	0	NO RED	0
1601	1	11	2007	1	0	0	0	0	0	0	0	0	0	0	0	0		1	1	0	0	NO RED	0
1602	1	11	2007	1	0	0	0	0	0	0	0	0	0	0	0	0		1	1	0	0	NO RED	0
1603	1	11	2007	1	0	0	0	0	0	0	0	0	0	0	0	0		1	1	0	0	NO RED	0
1604	1	11	2007	1	0	0	0	0	0	0	0	0	0	0	0	0		1	1	0	0	NO RED	0
1605	1	11	2007	1	0	0	0	0	0	0	0	0	0	0	0	0		1	1	0	0	NO RED	0
1606	1	11	2007	1	0	0	0	0	0	0	0	0	0	0	0	0		1	1	0	0	NO RED	0
1607	1	11	2007	1	0	0	0	0	0	0	0	0	0	0	0	0		1	1	0	0	NO RED	0
1608	1	11	2007	1	0	0	0	0	0	0	0	0	0	0	0	0		1	1	0	0	NO RED	0
1609	1	11	2007	1	0	0	0	0	0	0	0	0	0	0	0	0		1	1	0	0	NO RED	0
1610	1	11	2007	1	0	0	0	0	0	0	0	0	0	0	0	0		1	1	0	0	NO RED	0
1611	1	11	2007	1	0	0	0	0	0	0	0	0	0	0	0	0		1	1	0	0	NO RED	0
1612	1	11	2007	1	0	0	0	0	0	0	0	0	0	0	0	0		1	1	0	0	NO RED	0
1613	1	11	2007	1	0	0	0	0	0	0	0	0	0	0	0	0		1	1	0	0	NO RED	0
1614	1	11	2007	1	0	0	0	0	0	0	0	0	0	0	0	0		1	1	0	0	NO RED	0
1615	1	11	2007	1	0	0	0	0	0	0	0	0	0	0	0	0		1	1	0	0	NO RED	0
1616	1	11	2007	1	0	0	0	0	0	0	0	0	0	0	0	0		1	1	0	0	NO RED	0
1617	1	11	2007	1	0	0	0	0	0	0	0	0	0	0	0	0		1	1	0	0	NO RED	0
1618	1	11	2007	1	0	0	0	0	0	0	0	0	0	0	0	0		1	1	0	0	NO RED	0
1619	1	11	2007	1	0	0	0	0	0	0	0	0	0	0	0	0		1	1	0	0	NO RED	0
1620	1	11	2007	1	0	0	0	0	0	0	0	0	0	0	0	0		1	1	0	0	NO RED	0
1621	1	11	2007	1	0	0	0	0	0	0	0	0	0	0	0	0		1	1	0	0	NO RED	0
1622	1	11	2007	1	0	0	0	0	0	0	0	0	0	0	0	0		1	1	0	0	NO RED	0
1623	1	11	2007	1	0	0	0	0	0	0	0	0	0	0	0	0		2	1	0	0	NO RED	0
1624	1	11	2007	1	0	0	0	0	0	0	0	0	0	0	0	0		2	1	0	0	NO RED	0
1625	1	11	2007	1	0	0	0	0	0	0	0	0	0	0	0	0		2	1	0	0	NO RED	0
1626	1	11	2007	1	0	0	0	0	0	0	0	0	0	0	0	0		2	1	0	0	NO RED	0
1627	1	11	2007	1	0	0	0	0	0	0	0	0	0	0	0	0		2	1	0	0	NO RED	0
1628	1	11	2007	1	0	0	0	0	0	0	0	0	0	0	0	0		2	1	0	0	NO RED	0
1629	1	11	2007	1	0	0	0	0	0	0	0	0	0	0	0	0		2	1	0	0	NO RED	0
1630	1	11	2007	1	0	0	0	0	0	0	0	0	0	0	0	0		2	1	0	0	NO RED	0
1631	1	11	2007	1	0	0	0	0	0	0	0	0	0	0	0	0		2	1	0	0	NO RED	0
1632	1	11	2007	1	0	0	0	0	0	0	0	0	0	0	0	0		2	1	0	0	NO RED	0
1633	1	11	2007	1	0	0	0	0	0	0	0	0	0	0	0	0		2	1	0	0	NO RED	0
1634	1	11	2007	1	0	0	0	0	0	0	0	0	0	0	0	0		2	1	0	0	NO RED	0
1635	1	11	2007	1	0	0	0	0	0	0	0	0	0	0	0	0		2	1	0	0	NO RED	0
1636	1	11	2007	1	0	0	0	0	0	0	0	0	0	0	0	0		2	1	0	0	NO RED	0
1637	1	11	2007	1	0	0	0	0	0	0	0	0	0	0	0	0		2	1	0	0	NO RED	0
1638	1	11	2007	1	0	0	0	0	0	0	0	0	0	0	0	0		2	1	0	0	NO RED	0
1639	1	11	2007	1	0	0	0	0	0	0	0	0	0	0	0	0		2	1	0	0	NO RED	0
1640	1	11	2007	1	0	0	0	0	0	0	0	0	0	0	0	0		2	1	0	0	NO RED	0
1641	1	11	2007	1	0	0	0	0	0	0	0	0	0	0	0	0		2	1	0	0	NO RED	0
1642	1	11	2007	1	0	0	0	0	0	0	0	0	0	0	0	0		2	1	0	0	NO RED	0
1643	1	11	2007	1	0	0	0	0	0	0	0	0	0	0	0	0		2	1	0	0	NO RED	0
1644	1	11	2007	1	0	0	0	0	0	0	0	0	0	0	0	0		2	1	0	0	NO RED	0
1645	1	11	2007	1	0	0	0	0	0	0	0	0	0	0	0	0		2	1	0	0	NO RED	0
1646	1	11	2007	1	0	0	0	0	0	0	0	0	0	0	0	0		2	1	0	0	NO RED	0
1647	1	11	2007	1	0	0	0	0	0	0	0	0	0	0	0	0		2	1	0	0	NO RED	0
1648	1	11	2007	1	0	0	0	0	0	0	0	0	0	0	0	0		2	1	0	0	NO RED	0
1649	1	11	2007	1	0	0	0	0	0	0	0	0	0	0	0	0		2	1	0	0	NO RED	0
1650	1	11	2007	1	0	0	0	0	0	0	0	0	0	0	0	0		2	1	0	0	NO RED	0
1651	1	11	2007	1	0	0	0	0	0	0	0	0	0	0	0	0		2	1	0	0	NO RED	0
1652	1	11	2007	1	0	0	0	0	0	0	0	0	0	0	0	0		2	1	0	0	NO RED	0
1653	1	11	2007	1	0	0	0	0	0	0	0	0	0	0	0	0		2	1	0	0	NO RED	0
1654	1	11	2007	1	0	0	0	0	0	0	0	0	0	0	0	0		2	1	0	0	NO RED	0
1655	1	11	2007	1	0	0	0	0	0	0	0	0	0	0	0	0		2	1	0	0	NO RED	0
1656	1	11	2007	1	0	0	0	0	0	0	0	0	0	0	0	0		2	1	0	0	NO RED	0
1657	1	11	2007	1	0	0	0	0	0	0	0	0	0	0	0	0		2	1	0	0	NO RED	0
1658	1	11	2007	1	0	0	0	0	0	0	0	0	0	0	0	0		2	1	0	0	NO RED	0
1659	1	11	2007	1	0	0	0	0	0	0	0	0	0	0	0	0		2	1	0	0	NO RED	0
1660	1	11	2007	1	0	0	0	0	0	0	0	0	0	0	0	0		2	1	0	0	NO RED	0
1661	1	11	2007	1	0	0	0	0	0	0	0	0	0	0	0	0		2	1	0	0	NO RED	0
1662	1	11	2007	1	0	0	0	0	0	0	0	0	0	0	0	0		2	1	0	0	NO RED	0
1663	1	11	2007	1	0	0	0	0	0	0	0	0	0	0	0	0		2	1	0	0	NO RED	0
1664	1	11	2007	1	0	0	0	0	0	0	0	0	0	0	0	0		2	1	0	0	NO RED	0
1665	1	11	2007	1	0	0	0	0	0	0	0	0	0	0	0	0		2	1	0	0	NO RED	0
1666	1	11	2007	1	0	0	0	0	0	0	0	0	0	0	0	0		2	1	0	0	NO RED	0
1667	1	11	2007	1	0	0	0	0	0	0	0	0	0	0	0	0		2	1	0	0	NO RED	0
1668	1	11	2007	1	0	0	0	0	0	0	0	0	0	0	0	0		2	1	0	0	NO RED	0
1669	1	11	2007	1	0	0	0	0	0	0	0	0	0	0	0	0		2	1	0	0	NO RED	0
1670	1	11	2007	1	0	0	0	0	0	0	0	0	0	0	0	0		2	1	0	0	NO RED	0
1671	1	11	2007	1	0	0	0	0	0	0	0	0	0	0	0	0		2	1	0	0	NO RED	0
1672	1	11	2007	1	0	0	0	0	0	0	0	0	0	0	0	0		2	1	0	0	NO RED	0
1673	1	11	2007	1	0	0	0	0	0	0	0	0	0	0	0	0		2	1	0	0	NO RED	0
1674	1	11	2007	1	0	0	0	0	0	0	0	0	0	0	0	0		2	1	0	0	NO RED	0
1675	1	11	2007	1	0	0	0	0	0	0	0	0	0	0	0	0		2	1	0	0	NO RED	0
1676	1	11	2007	1	0	0	0	0	0	0	0	0	0	0	0	0		2	1	0	0	NO RED	0
1677	1	11	2007	1	0	0	0	0	0	0	0	0	0	0	0	0		2	1	0	0	NO RED	0
1678	1	11	2007	1	0	0	0	0	0	0	0	0	0	0	0	0		2	1	0	0	NO RED	0
1679	1	11	2007	1	0	0	0	0	0	0	0	0	0	0	0	0		2	1	0	0	NO RED	0
1680	1	11	2007	1	0	0	0	0	0	0	0	0	0	0	0	0		2	1	0	0	NO RED	0
1681	1	11	2007	1	0	0	0	0	0	0	0	0	0	0	0	0		2	1	0	0	NO RED	0
1682	1	11	2007	1	0	0	0	0	0	0	0	0	0	0	0	0		2	1	0	0	NO RED	0
1683	1	11	2007	1	0	0	0	0	0	0	0	0	0	0	0	0		2	1	0	0	NO RED	0
1684	1	11	2007	1	0	0	0	0	0	0	0	0	0	0	0	0		2	1	0	0	NO RED	0
1685	1	11	2007	1	0	0	0	0	0	0	0	0	0	0	0	0		2	1	0	0	NO RED	0
1686	1	11	2007	1	0	0	0	0	0	0	0	0	0	0	0	0		2	1	0	0	NO RED	0
1687	1	11	2007	1	0	0	0	0	0	0	0	0	0	0	0	0		2	1	0	0	NO RED	0
1688	1	11	2007	1	0	0	0	0	0	0	0	0	0	0	0	0		2	1	0	0	NO RED	0
1689	1	11	2007	1	0	0	0	0	0	0	0	0	0	0	0	0		2	1	0	0	NO RED	0
1690	1	11	2007	1	0	0	0	0	0	0	0	0	0	0	0	0		2	1	0	0	NO RED	0
1691	1	11	2007	1	0	0	0	0	0	0	0	0	0	0	0	0		2	1	0	0	NO RED	0
1692	1	11	2007	1	0	0	0	0	0	0	0	0	0	0	0	0		2	1	0	0	NO RED	0
1693	1	11	2007	1	0	0	0	0	0	0	0	0	0	0	0	0		2	1	0	0	NO RED	0
1694	1	11	2007	1	0	0	0	0	0	0	0	0	0	0	0	0		2	1	0	0	NO RED	0
1695	1	11	2007	1	0	0	0	0	0	0	0	0	0	0	0	0		2	1	0	0	NO RED	0
1696	1	11	2007	1	0	0	0	0	0	0	0	0	0	0	0	0		2	1	0	0	NO RED	0
1697	1	11	2007	1	0	0	0	0	0	0	0	0	0	0	0	0		2	1	0	0	NO RED	0
1698	1	11	2007	1	0	0	0	0	0	0	0	0	0	0	0	0		2	1	0	0	NO RED	0
1699	1	11	2007	1	0	0	0	0	0	0	0	0	0	0	0	0		2	1	0	0	NO RED	0
1700	1	11	2007	1	0	0	0	0	0	0	0	0	0	0	0	0		2	1	0	0	NO RED	0
1701	1	11	2007	1	0	0	0	0	0	0	0	0	0	0	0	0		2	1	0	0	NO RED	0
1702	1	11	2007	1	0	0	0	0	0	0	0	0	0	0	0	0		2	1	0	0	NO RED	0
1703	1	11	2007	1	0	0	0	0	0	0	0	0	0	0	0	0		2	1	0	0	NO RED	0
1704	1	11	2007	1	0	0	0	0	0	0	0	0	0	0	0	0		2	1	0	0	NO RED	0
1705	1	11	2007	1	0	0	0	0	0	0	0	0	0	0	0	0		2	1	0	0	NO RED	0
1706	1	11	2007	1	0	0	0	0	0	0	0	0	0	0	0	0		2	1	0	0	NO RED	0
1707	1	11	2007	1	0	0	0	0	0	0	0	0	0	0	0	0		2	1	0	0	NO RED	0
1708	1	11	2007	1	0	0	0	0	0	0	0	0	0	0	0	0		2	1	0	0	NO RED	0
1709	1	11	2007	1	0	0	0	0	0	0	0	0	0	0	0	0		2	1	0	0	NO RED	0
1710	1	11	2007	1	0	0	0	0	0	0	0	0	0	0	0	0		2	1	0	0	NO RED	0
1711	1	11	2007	1	0	0	0	0	0	0	0	0	0	0	0	0		2	1	0	0	NO RED	0
1712	1	11	2007	1	0	0	0	0	0	0	0	0	0	0	0	0		2	1	0	0	NO RED	0
1713	1	11	2007	1	0	0	0	0	0	0	0	0	0	0	0	0		2	1	0	0	NO RED	0
1714	1	11	2007	1	0	0	0	0	0	0	0	0	0	0	0	0		2	1	0	0	NO RED	0
1715	1	11	2007	1	0	0	0	0	0	0	0	0	0	0	0	0		2	1	0	0	NO RED	0
1716	1	11	2007	1	0	0	0	0	0	0	0	0	0	0	0	0		2	1	0	0	NO RED	0
1717	1	11	2007	1	0	0	0	0	0	0	0	0	0	0	0	0		2	1	0	0	NO RED	0
1718	1	12	2007	1	1	0	0	0	0	0	0	0	0	0	1	1	1	2	1	0	0	NO RED	1
1719	1	12	2007	1	3	0	0	0	0	0	0	0	0	0	3	1	1	2	1	0	0	NO RED	1
1720	1	12	2007	1	0	0	0	0	0	1	0	0	0	0	1	1	1	1	1	0	0	NO RED	1
1721	1	12	2007	1	0	0	0	0	0	0	0	0	0	0	0	0		2	1	0	0	NO RED	0
1722	1	12	2007	1	0	0	0	0	0	0	0	0	0	0	0	0		2	1	0	0	NO RED	0
1723	1	12	2007	1	0	0	0	0	0	0	0	0	0	0	0	0		2	1	0	0	NO RED	0
1724	1	12	2007	1	0	0	0	0	0	0	0	0	0	0	0	0		2	1	0	0	NO RED	0
1725	1	12	2007	1	0	0	0	0	0	0	0	0	0	0	0	0		2	1	0	0	NO RED	0
1726	1	12	2007	1	0	0	0	0	0	0	0	0	0	0	0	0		2	1	0	0	NO RED	0
1727	1	12	2007	1	0	0	0	0	0	0	0	0	0	0	0	0		2	1	0	0	NO RED	0
1728	1	12	2007	1	0	0	0	0	0	0	0	0	0	0	0	0		2	1	0	0	NO RED	0
1729	1	12	2007	1	0	0	0	0	0	0	0	0	0	0	0	0		2	1	0	0	NO RED	0
1730	1	12	2007	1	0	0	0	0	0	0	0	0	0	0	0	0		2	1	0	0	NO RED	0
1731	1	12	2007	1	0	0	0	0	0	0	0	0	0	0	0	0		2	1	0	0	NO RED	0
1732	1	12	2007	1	0	0	0	0	0	0	0	0	0	0	0	0		2	1	0	0	NO RED	0
1733	1	12	2007	1	0	0	0	0	0	0	0	0	0	0	0	0		2	1	0	0	NO RED	0
1734	1	12	2007	1	0	0	0	0	0	0	0	0	0	0	0	0		2	1	0	0	NO RED	0
1735	1	12	2007	1	0	0	0	0	0	0	0	0	0	0	0	0		2	1	0	0	NO RED	0
1736	1	12	2007	1	0	0	0	0	0	0	0	0	0	0	0	0		2	1	0	0	NO RED	0
1737	1	12	2007	1	0	0	0	0	0	0	0	0	0	0	0	0		2	1	0	0	NO RED	0
1738	1	12	2007	1	0	0	0	0	0	0	0	0	0	0	0	0		2	1	0	0	NO RED	0
1739	1	12	2007	1	0	0	0	0	0	0	0	0	0	0	0	0		2	1	0	0	NO RED	0
1740	1	12	2007	1	0	0	0	0	0	0	0	0	0	0	0	0		2	1	0	0	NO RED	0
1741	1	12	2007	1	0	0	0	0	0	0	0	0	0	0	0	0		2	1	0	0	NO RED	0
1742	1	12	2007	1	0	0	0	0	0	0	0	0	0	0	0	0		2	1	0	0	NO RED	0
1743	1	12	2007	1	0	0	0	0	0	0	0	0	0	0	0	0		2	1	0	0	NO RED	0
1744	1	12	2007	1	0	0	0	0	0	0	0	0	0	0	0	0		2	1	0	0	NO RED	0
1745	1	12	2007	1	0	0	0	0	0	0	0	0	0	0	0	0		2	1	0	0	NO RED	0
1746	1	12	2007	1	0	0	0	0	0	0	0	0	0	0	0	0		2	1	0	0	NO RED	0
1747	1	12	2007	1	0	0	0	0	0	0	0	0	0	0	0	0		2	1	0	0	NO RED	0
1748	1	12	2007	1	0	0	0	0	0	0	0	0	0	0	0	0		2	1	0	0	NO RED	0
1749	1	12	2007	1	0	0	0	0	0	0	0	0	0	0	0	0		2	1	0	0	NO RED	0
1750	1	12	2007	1	0	0	0	0	0	0	0	0	0	0	0	0		2	1	0	0	NO RED	0
1751	1	12	2007	1	0	0	0	0	0	0	0	0	0	0	0	0		2	1	0	0	NO RED	0
1752	1	12	2007	1	0	0	0	0	0	0	0	0	0	0	0	0		2	1	0	0	NO RED	0
1753	1	12	2007	1	0	0	0	0	0	0	0	0	0	0	0	0		2	1	0	0	NO RED	0
1754	1	12	2007	1	0	0	0	0	0	0	0	0	0	0	0	0		2	1	0	0	NO RED	0
1755	1	12	2007	1	0	0	0	0	0	0	0	0	0	0	0	0		2	1	0	0	NO RED	0
1756	1	12	2007	1	0	0	0	0	0	0	0	0	0	0	0	0		2	1	0	0	NO RED	0
1757	1	12	2007	1	0	0	0	0	0	0	0	0	0	0	0	0		2	1	0	0	NO RED	0
1758	1	12	2007	1	0	0	0	0	0	0	0	0	0	0	0	0		2	1	0	0	NO RED	0
1759	1	12	2007	1	0	0	0	0	0	0	0	0	0	0	0	0		2	1	0	0	NO RED	0
1760	1	12	2007	1	0	0	0	0	0	0	0	0	0	0	0	0		2	1	0	0	NO RED	0
1761	1	12	2007	1	0	0	0	0	0	0	0	0	0	0	0	0		2	1	0	0	NO RED	0
1762	1	12	2007	1	0	0	0	0	0	0	0	0	0	0	0	0		2	1	0	0	NO RED	0
1763	1	12	2007	1	0	0	0	0	0	0	0	0	0	0	0	0		2	1	0	0	NO RED	0
1764	1	12	2007	1	0	0	0	0	0	0	0	0	0	0	0	0		2	1	0	0	NO RED	0
1765	1	12	2007	1	0	0	0	0	0	0	0	0	0	0	0	0		2	1	0	0	NO RED	0
1766	1	12	2007	1	0	0	0	0	0	0	0	0	0	0	0	0		2	1	0	0	NO RED	0
1767	1	12	2007	1	0	0	0	0	0	0	0	0	0	0	0	0		2	1	0	0	NO RED	0
1768	1	12	2007	1	0	0	0	0	0	0	0	0	0	0	0	0		2	1	0	0	NO RED	0
1769	1	12	2007	1	0	0	0	0	0	0	0	0	0	0	0	0		2	1	0	0	NO RED	0
1770	1	12	2007	1	0	0	0	0	0	0	0	0	0	0	0	0		2	1	0	0	NO RED	0
1771	1	12	2007	1	0	0	0	0	0	0	0	0	0	0	0	0		2	1	0	0	NO RED	0
1772	1	12	2007	1	0	0	0	0	0	0	0	0	0	0	0	0		2	1	0	0	NO RED	0
1773	1	12	2007	1	0	0	0	0	0	0	0	0	0	0	0	0		2	1	0	0	NO RED	0
1774	1	12	2007	1	0	0	0	0	0	0	0	0	0	0	0	0		2	1	0	0	NO RED	0
1775	1	12	2007	1	0	0	0	0	0	0	0	0	0	0	0	0		2	1	0	0	NO RED	0
1776	1	12	2007	1	0	0	0	0	0	0	0	0	0	0	0	0		2	1	0	0	NO RED	0
1777	1	12	2007	1	0	0	0	0	0	0	0	0	0	0	0	0		2	1	0	0	NO RED	0
1778	1	12	2007	1	0	0	0	0	0	0	0	0	0	0	0	0		2	1	0	0	NO RED	0
1779	1	12	2007	1	0	0	0	0	0	0	0	0	0	0	0	0		2	1	0	0	NO RED	0
1780	1	12	2007	1	0	0	0	0	0	0	0	0	0	0	0	0		2	1	0	0	NO RED	0
1781	1	12	2007	1	0	0	0	0	0	0	0	0	0	0	0	0		2	1	0	0	NO RED	0
1782	1	12	2007	1	0	0	0	0	0	0	0	0	0	0	0	0		2	1	0	0	NO RED	0
1783	1	12	2007	1	0	0	0	0	0	0	0	0	0	0	0	0		2	1	0	0	NO RED	0
1784	1	12	2007	1	0	0	0	0	0	0	0	0	0	0	0	0		1	1	0	0	NO RED	0
1785	1	12	2007	1	0	0	0	0	0	0	0	0	0	0	0	0		1	1	0	0	NO RED	0
1786	1	12	2007	1	0	0	0	0	0	0	0	0	0	0	0	0		1	1	0	0	NO RED	0
1787	1	12	2007	1	0	0	0	0	0	0	0	0	0	0	0	0		1	1	0	0	NO RED	0
1788	1	12	2007	1	0	0	0	0	0	0	0	0	0	0	0	0		1	1	0	0	NO RED	0
1789	1	12	2007	1	0	0	0	0	0	0	0	0	0	0	0	0		1	1	0	0	NO RED	0
1790	1	12	2007	1	0	0	0	0	0	0	0	0	0	0	0	0		1	1	0	0	NO RED	0
1791	1	12	2007	1	0	0	0	0	0	0	0	0	0	0	0	0		1	1	0	0	NO RED	0
1792	1	12	2007	1	0	0	0	0	0	0	0	0	0	0	0	0		1	1	0	0	NO RED	0
1793	1	12	2007	1	0	0	0	0	0	0	0	0	0	0	0	0		1	1	0	0	NO RED	0
1794	1	12	2007	1	0	0	0	0	0	0	0	0	0	0	0	0		1	1	0	0	NO RED	0
1795	1	12	2007	1	0	0	0	0	0	0	0	0	0	0	0	0		1	1	0	0	NO RED	0
1796	1	12	2007	1	0	0	0	0	0	0	0	0	0	0	0	0		1	1	0	0	NO RED	0
1797	1	12	2007	1	0	0	0	0	0	0	0	0	0	0	0	0		1	1	0	0	NO RED	0
1798	1	12	2007	1	0	0	0	0	0	0	0	0	0	0	0	0		1	1	0	0	NO RED	0
1799	1	12	2007	1	0	0	0	0	0	0	0	0	0	0	0	0		1	1	0	0	NO RED	0
1800	1	12	2007	1	0	0	0	0	0	0	0	0	0	0	0	0		1	1	0	0	NO RED	0
1801	1	12	2007	1	0	0	0	0	0	0	0	0	0	0	0	0		1	1	0	0	NO RED	0
1802	1	12	2007	1	0	0	0	0	0	0	0	0	0	0	0	0		1	1	0	0	NO RED	0
1803	1	12	2007	1	0	0	0	0	0	0	0	0	0	0	0	0		1	1	0	0	NO RED	0
1804	1	12	2007	1	0	0	0	0	0	0	0	0	0	0	0	0		1	1	0	0	NO RED	0
1805	1	12	2007	1	0	0	0	0	0	0	0	0	0	0	0	0		1	1	0	0	NO RED	0
1806	1	12	2007	1	0	0	0	0	0	0	0	0	0	0	0	0		1	1	0	0	NO RED	0
1807	1	12	2007	1	0	0	0	0	0	0	0	0	0	0	0	0		1	1	0	0	NO RED	0
1808	1	12	2007	1	0	0	0	0	0	0	0	0	0	0	0	0		1	1	0	0	NO RED	0
1809	1	12	2007	1	0	0	0	0	0	0	0	0	0	0	0	0		1	1	0	0	NO RED	0
1810	1	12	2007	1	0	0	0	0	0	0	0	0	0	0	0	0		1	1	0	0	NO RED	0
1811	1	12	2007	1	0	0	0	0	0	0	0	0	0	0	0	0		1	1	0	0	NO RED	0
1812	1	12	2007	1	0	0	0	0	0	0	0	0	0	0	0	0		1	1	0	0	NO RED	0
1813	1	12	2007	1	0	0	0	0	0	0	0	0	0	0	0	0		1	1	0	0	NO RED	0
1814	1	12	2007	1	0	0	0	0	0	0	0	0	0	0	0	0		1	1	0	0	NO RED	0
1815	1	12	2007	1	0	0	0	0	0	0	0	0	0	0	0	0		1	1	0	0	NO RED	0
1816	1	12	2007	1	0	0	0	0	0	0	0	0	0	0	0	0		1	1	0	0	NO RED	0
1817	1	12	2007	1	0	0	0	0	0	0	0	0	0	0	0	0		1	1	0	0	NO RED	0
1818	1	12	2007	1	0	0	0	0	0	0	0	0	0	0	0	0		1	1	0	0	NO RED	0
1819	1	12	2007	1	0	0	0	0	0	0	0	0	0	0	0	0		1	1	0	0	NO RED	0
1820	1	12	2007	1	0	0	0	0	0	0	0	0	0	0	0	0		1	1	0	0	NO RED	0
1821	1	12	2007	1	0	0	0	0	0	0	0	0	0	0	0	0		1	1	0	0	NO RED	0
1822	1	12	2007	1	0	0	0	0	0	0	0	0	0	0	0	0		1	1	0	0	NO RED	0
1823	1	12	2007	1	0	0	0	0	0	0	0	0	0	0	0	0		1	1	0	0	NO RED	0
1824	1	12	2007	1	0	0	0	0	0	0	0	0	0	0	0	0		1	1	0	0	NO RED	0
1825	1	12	2007	1	0	0	0	0	0	0	0	0	0	0	0	0		1	1	0	0	NO RED	0
1826	1	12	2007	1	0	0	0	0	0	0	0	0	0	0	0	0		1	1	0	0	NO RED	0
1827	1	12	2007	1	0	0	0	0	0	0	0	0	0	0	0	0		1	1	0	0	NO RED	0
1828	1	12	2007	1	0	0	0	0	0	0	0	0	0	0	0	0		1	1	0	0	NO RED	0
1829	1	12	2007	1	0	0	0	0	0	0	0	0	0	0	0	0		1	1	0	0	NO RED	0
1830	1	12	2007	1	0	0	0	0	0	0	0	0	0	0	0	0		1	1	0	0	NO RED	0
1831	1	12	2007	1	0	0	0	0	0	0	0	0	0	0	0	0		1	1	0	0	NO RED	0
1832	1	12	2007	1	0	0	0	0	0	0	0	0	0	0	0	0		1	1	0	0	NO RED	0
1833	1	12	2007	1	0	0	0	0	0	0	0	0	0	0	0	0		1	1	0	0	NO RED	0
1834	1	12	2007	1	0	0	0	0	0	0	0	0	0	0	0	0		1	1	0	0	NO RED	0
1835	1	12	2007	1	0	0	0	0	0	0	0	0	0	0	0	0		1	1	0	0	NO RED	0
1836	1	12	2007	1	0	0	0	0	0	0	0	0	0	0	0	0		1	1	0	0	NO RED	0
1837	1	12	2007	1	0	0	0	0	0	0	0	0	0	0	0	0		1	1	0	0	NO RED	0
1838	1	12	2007	1	0	0	0	0	0	0	0	0	0	0	0	0		1	1	0	0	NO RED	0
1839	1	12	2007	1	0	0	0	0	0	0	0	0	0	0	0	0		1	1	0	0	NO RED	0
1840	1	12	2007	1	0	0	0	0	0	0	0	0	0	0	0	0		1	1	0	0	NO RED	0
1841	1	12	2007	1	0	0	0	0	0	0	0	0	0	0	0	0		1	1	0	0	NO RED	0
1842	1	12	2007	1	0	0	0	0	0	0	0	0	0	0	0	0		1	1	0	0	NO RED	0
1843	1	12	2007	1	0	0	0	0	0	0	0	0	0	0	0	0		1	1	0	0	NO RED	0
1844	1	12	2007	1	0	0	0	0	0	0	0	0	0	0	0	0		1	1	0	0	NO RED	0
1845	1	12	2007	1	0	0	0	0	0	0	0	0	0	0	0	0		1	1	0	0	NO RED	0
1846	1	12	2007	1	0	0	0	0	0	0	0	0	0	0	0	0		1	1	0	0	NO RED	0
1847	1	12	2007	1	0	0	0	0	0	0	0	0	0	0	0	0		1	1	0	0	NO RED	0
1848	1	12	2007	1	0	0	0	0	0	0	0	0	0	0	0	0		1	1	0	0	NO RED	0
1849	1	12	2007	1	0	0	0	0	0	0	0	0	0	0	0	0		1	1	0	0	NO RED	0
1850	1	12	2007	1	0	0	0	0	0	0	0	0	0	0	0	0		1	1	0	0	NO RED	0
1851	1	12	2007	1	0	0	0	0	0	0	0	0	0	0	0	0		1	1	0	0	NO RED	0
1852	1	12	2007	1	0	0	0	0	0	0	0	0	0	0	0	0		1	1	0	0	NO RED	0
1853	1	12	2007	1	0	0	0	0	0	0	0	0	0	0	0	0		1	1	0	0	NO RED	0
1854	1	12	2007	1	0	0	0	0	0	0	0	0	0	0	0	0		1	1	0	0	NO RED	0
1855	1	12	2007	1	0	0	0	0	0	0	0	0	0	0	0	0		1	1	0	0	NO RED	0
1856	1	12	2007	1	0	0	0	0	0	0	0	0	0	0	0	0		1	1	0	0	NO RED	0
1857	1	12	2007	1	0	0	0	0	0	0	0	0	0	0	0	0		1	1	0	0	NO RED	0
1858	1	12	2007	1	0	0	0	0	0	0	0	0	0	0	0	0		1	1	0	0	NO RED	0
1859	1	12	2007	1	0	0	0	0	0	0	0	0	0	0	0	0		1	1	0	0	NO RED	0
1860	1	12	2007	1	0	0	0	0	0	0	0	0	0	0	0	0		1	1	0	0	NO RED	0
1861	1	12	2007	1	0	0	0	0	0	0	0	0	0	0	0	0		1	1	0	0	NO RED	0
1862	1	12	2007	1	0	0	0	0	0	0	0	0	0	0	0	0		1	1	0	0	NO RED	0
1863	1	12	2007	1	0	0	0	0	0	0	0	0	0	0	0	0		1	1	0	0	NO RED	0
1864	1	12	2007	1	0	0	0	0	0	0	0	0	0	0	0	0		1	1	0	0	NO RED	0
1865	1	12	2007	1	0	0	0	0	0	0	0	0	0	0	0	0		1	1	0	0	NO RED	0
1866	1	12	2007	1	0	0	0	0	0	0	0	0	0	0	0	0		1	1	0	0	NO RED	0
1867	1	12	2007	1	0	0	0	0	0	0	0	0	0	0	0	0		1	1	0	0	NO RED	0
1868	1	12	2007	1	0	0	0	0	0	0	0	0	0	0	0	0		1	1	0	0	NO RED	0
1869	1	12	2007	1	0	0	0	0	0	0	0	0	0	0	0	0		1	1	0	0	NO RED	0
1870	1	12	2007	1	0	0	0	0	0	0	0	0	0	0	0	0		1	1	0	0	NO RED	0
1871	1	12	2007	1	0	0	0	0	0	0	0	0	0	0	0	0		1	1	0	0	NO RED	0
1872	1	12	2007	1	0	0	0	0	0	0	0	0	0	0	0	0		1	1	0	0	NO RED	0
1873	1	12	2007	1	0	0	0	0	0	0	0	0	0	0	0	0		1	1	0	0	NO RED	0
1874	1	12	2007	1	0	0	0	0	0	0	0	0	0	0	0	0		1	1	0	0	NO RED	0
1875	1	12	2007	1	0	0	0	0	0	0	0	0	0	0	0	0		1	1	0	0	NO RED	0
1876	1	12	2007	1	0	0	0	0	0	0	0	0	0	0	0	0		1	1	0	0	NO RED	0
1877	1	12	2007	1	0	0	0	0	0	0	0	0	0	0	0	0		1	1	0	0	NO RED	0
1878	1	12	2007	1	0	0	0	0	0	0	0	0	0	0	0	0		1	1	0	0	NO RED	0
1879	1	12	2007	1	0	0	0	0	0	0	0	0	0	0	0	0		1	1	0	0	NO RED	0
1880	1	12	2007	1	0	0	0	0	0	0	0	0	0	0	0	0		1	1	0	0	NO RED	0
1881	1	12	2007	1	0	0	0	0	0	0	0	0	0	0	0	0		1	1	0	0	NO RED	0
1882	1	12	2007	1	0	0	0	0	0	0	0	0	0	0	0	0		1	1	0	0	NO RED	0
1883	1	12	2007	1	0	0	0	0	0	0	0	0	0	0	0	0		1	1	0	0	NO RED	0
1884	1	12	2007	1	0	0	0	0	0	0	0	0	0	0	0	0		1	1	0	0	NO RED	0
1885	1	12	2007	1	0	0	0	0	0	0	0	0	0	0	0	0		1	1	0	0	NO RED	0
1886	1	12	2007	1	0	0	0	0	0	0	0	0	0	0	0	0		1	1	0	0	NO RED	0
1887	1	12	2007	1	0	0	0	0	0	0	0	0	0	0	0	0		1	1	0	0	NO RED	0
1888	1	12	2007	1	0	0	0	0	0	0	0	0	0	0	0	0		1	1	0	0	NO RED	0
1889	1	12	2007	1	0	0	0	0	0	0	0	0	0	0	0	0		1	1	0	0	NO RED	0
1890	1	12	2007	1	0	0	0	0	0	0	0	0	0	0	0	0		1	1	0	0	NO RED	0
1891	1	12	2007	1	0	0	0	0	0	0	0	0	0	0	0	0		1	1	0	0	NO RED	0
1892	1	12	2007	1	0	0	0	0	0	0	0	0	0	0	0	0		1	1	0	0	NO RED	0
1893	1	12	2007	1	0	0	0	0	0	0	0	0	0	0	0	0		1	1	0	0	NO RED	0
1894	1	12	2007	1	0	0	0	0	0	0	0	0	0	0	0	0		1	1	0	0	NO RED	0
1895	1	12	2007	1	0	0	0	0	0	0	0	0	0	0	0	0		1	1	0	0	NO RED	0
1896	1	12	2007	1	0	0	0	0	0	0	0	0	0	0	0	0		1	1	0	0	NO RED	0
1897	1	12	2007	1	0	0	0	0	0	0	0	0	0	0	0	0		1	1	0	0	NO RED	0
1898	1	12	2007	1	0	0	0	0	0	0	0	0	0	0	0	0		1	1	0	0	NO RED	0
1899	1	12	2007	1	0	0	0	0	0	0	0	0	0	0	0	0		1	1	0	0	NO RED	0
1900	1	12	2007	1	0	0	0	0	0	0	0	0	0	0	0	0		1	1	0	0	NO RED	0
1901	1	12	2007	1	0	0	0	0	0	0	0	0	0	0	0	0		1	1	0	0	NO RED	0
1902	1	12	2007	1	0	0	0	0	0	0	0	0	0	0	0	0		1	1	0	0	NO RED	0
1903	1	12	2007	1	0	0	0	0	0	0	0	0	0	0	0	0		1	1	0	0	NO RED	0
1904	1	12	2007	1	0	0	0	0	0	0	0	0	0	0	0	0		1	1	0	0	NO RED	0
1905	1	12	2007	1	0	0	0	0	0	0	0	0	0	0	0	0		1	1	0	0	NO RED	0
1906	1	12	2007	1	0	0	0	0	0	0	0	0	0	0	0	0		1	1	0	0	NO RED	0
1907	1	12	2007	1	0	0	0	0	0	0	0	0	0	0	0	0		1	1	0	0	NO RED	0
1908	1	12	2007	1	0	0	0	0	0	0	0	0	0	0	0	0		1	1	0	0	NO RED	0
1909	1	12	2007	1	0	0	0	0	0	0	0	0	0	0	0	0		1	1	0	0	NO RED	0
1910	1	12	2007	1	0	0	0	0	0	0	0	0	0	0	0	0		1	1	0	0	NO RED	0
1911	1	12	2007	1	0	0	0	0	0	0	0	0	0	0	0	0		1	1	0	0	NO RED	0
1912	1	12	2007	1	0	0	0	0	0	0	0	0	0	0	0	0		1	1	0	0	NO RED	0
1913	1	12	2007	1	0	0	0	0	0	0	0	0	0	0	0	0		1	1	0	0	NO RED	0
1914	1	12	2007	1	0	0	0	0	0	0	0	0	0	0	0	0		1	1	0	0	NO RED	0
1915	1	1	2008	1	0	1	0	0	0	0	0	0	0	0	1	1	1	2	1	0	0	NO RED	1
1916	1	1	2008	1	0	0	0	0	0	1	0	0	0	0	1	1	1	2	1	0	0	NO RED	1
1917	1	1	2008	1	0	0	0	0	0	0	0	0	0	0	0	0		2	1	0	0	NO RED	0
1918	1	1	2008	1	0	0	0	0	0	0	0	0	0	0	0	0		2	1	0	0	NO RED	0
1919	1	1	2008	1	0	0	0	0	0	0	0	0	0	0	0	0		2	1	0	0	NO RED	0
1920	1	1	2008	1	0	0	0	0	0	0	0	0	0	0	0	0		2	1	0	0	NO RED	0
1921	1	1	2008	1	0	0	0	0	0	0	0	0	0	0	0	0		2	1	0	0	NO RED	0
1922	1	1	2008	1	0	0	0	0	0	0	0	0	0	0	0	0		2	1	0	0	NO RED	0
1923	1	1	2008	1	0	0	0	0	0	0	0	0	0	0	0	0		2	1	0	0	NO RED	0
1924	1	1	2008	1	0	0	0	0	0	0	0	0	0	0	0	0		2	1	0	0	NO RED	0
1925	1	1	2008	1	0	0	0	0	0	0	0	0	0	0	0	0		2	1	0	0	NO RED	0
1926	1	1	2008	1	0	0	0	0	0	0	0	0	0	0	0	0		2	1	0	0	NO RED	0
1927	1	1	2008	1	0	0	0	0	0	0	0	0	0	0	0	0		2	1	0	0	NO RED	0
1928	1	1	2008	1	0	0	0	0	0	0	0	0	0	0	0	0		2	1	0	0	NO RED	0
1929	1	1	2008	1	0	0	0	0	0	0	0	0	0	0	0	0		2	1	0	0	NO RED	0
1930	1	1	2008	1	0	0	0	0	0	0	0	0	0	0	0	0		2	1	0	0	NO RED	0
1931	1	1	2008	1	0	0	0	0	0	0	0	0	0	0	0	0		2	1	0	0	NO RED	0
1932	1	1	2008	1	0	0	0	0	0	0	0	0	0	0	0	0		2	1	0	0	NO RED	0
1933	1	1	2008	1	0	0	0	0	0	0	0	0	0	0	0	0		2	1	0	0	NO RED	0
1934	1	1	2008	1	0	0	0	0	0	0	0	0	0	0	0	0		2	1	0	0	NO RED	0
1935	1	1	2008	1	0	0	0	0	0	0	0	0	0	0	0	0		2	1	0	0	NO RED	0
1936	1	1	2008	1	0	0	0	0	0	0	0	0	0	0	0	0		2	1	0	0	NO RED	0
1937	1	1	2008	1	0	0	0	0	0	0	0	0	0	0	0	0		2	1	0	0	NO RED	0
1938	1	1	2008	1	0	0	0	0	0	0	0	0	0	0	0	0		2	1	0	0	NO RED	0
1939	1	1	2008	1	0	0	0	0	0	0	0	0	0	0	0	0		2	1	0	0	NO RED	0
1940	1	1	2008	1	0	0	0	0	0	0	0	0	0	0	0	0		2	1	0	0	NO RED	0
1941	1	1	2008	1	0	0	0	0	0	0	0	0	0	0	0	0		1	1	0	0	NO RED	0
1942	1	1	2008	1	0	0	0	0	0	0	0	0	0	0	0	0		1	1	0	0	NO RED	0
1943	1	1	2008	1	0	0	0	0	0	0	0	0	0	0	0	0		1	1	0	0	NO RED	0
1944	1	1	2008	1	0	0	0	0	0	0	0	0	0	0	0	0		1	1	0	0	NO RED	0
1945	1	1	2008	1	0	0	0	0	0	0	0	0	0	0	0	0		1	1	0	0	NO RED	0
1946	1	1	2008	1	0	0	0	0	0	0	0	0	0	0	0	0		1	1	0	0	NO RED	0
1947	1	1	2008	1	0	0	0	0	0	0	0	0	0	0	0	0		1	1	0	0	NO RED	0
1948	1	1	2008	1	0	0	0	0	0	0	0	0	0	0	0	0		1	1	0	0	NO RED	0
1949	1	1	2008	1	0	0	0	0	0	0	0	0	0	0	0	0		1	1	0	0	NO RED	0
1950	1	1	2008	1	0	0	0	0	0	0	0	0	0	0	0	0		1	1	0	0	NO RED	0
1951	1	1	2008	1	0	0	0	0	0	0	0	0	0	0	0	0		1	1	0	0	NO RED	0
1952	1	1	2008	1	0	0	0	0	0	0	0	0	0	0	0	0		1	1	0	0	NO RED	0
1953	1	1	2008	1	0	0	0	0	0	0	0	0	0	0	0	0		1	1	0	0	NO RED	0
1954	1	1	2008	1	0	0	0	0	0	0	0	0	0	0	0	0		1	1	0	0	NO RED	0
1955	1	1	2008	1	0	0	0	0	0	0	0	0	0	0	0	0		1	1	0	0	NO RED	0
1956	1	1	2008	1	0	0	0	0	0	0	0	0	0	0	0	0		1	1	0	0	NO RED	0
1957	1	1	2008	1	0	0	0	0	0	0	0	0	0	0	0	0		1	1	0	0	NO RED	0
1958	1	1	2008	1	0	0	0	0	0	0	0	0	0	0	0	0		1	1	0	0	NO RED	0
1959	1	1	2008	1	0	0	0	0	0	0	0	0	0	0	0	0		1	1	0	0	NO RED	0
1960	1	1	2008	1	0	0	0	0	0	0	0	0	0	0	0	0		1	1	0	0	NO RED	0
1961	1	1	2008	1	0	0	0	0	0	0	0	0	0	0	0	0		1	1	0	0	NO RED	0
1962	1	1	2008	1	0	0	0	0	0	0	0	0	0	0	0	0		1	1	0	0	NO RED	0
1963	1	1	2008	1	0	0	0	0	0	0	0	0	0	0	0	0		1	1	0	0	NO RED	0
1964	1	1	2008	1	0	0	0	0	0	0	0	0	0	0	0	0		1	1	0	0	NO RED	0
1965	1	1	2008	1	0	0	0	0	0	0	0	0	0	0	0	0		1	1	0	0	NO RED	0
1966	1	1	2008	1	0	0	0	0	0	0	0	0	0	0	0	0		1	1	0	0	NO RED	0
1967	1	1	2008	1	0	0	0	0	0	0	0	0	0	0	0	0		1	1	0	0	NO RED	0
1968	1	1	2008	1	0	0	0	0	0	0	0	0	0	0	0	0		1	1	0	0	NO RED	0
1969	1	1	2008	1	0	0	0	0	0	0	0	0	0	0	0	0		1	1	0	0	NO RED	0
1970	1	1	2008	1	0	0	0	0	0	0	0	0	0	0	0	0		1	1	0	0	NO RED	0
1971	1	1	2008	1	0	0	0	0	0	0	0	0	0	0	0	0		1	1	0	0	NO RED	0
1972	1	1	2008	1	0	0	0	0	0	0	0	0	0	0	0	0		1	1	0	0	NO RED	0
1973	1	1	2008	1	0	0	0	0	0	0	0	0	0	0	0	0		1	1	0	0	NO RED	0
1974	1	1	2008	1	0	0	0	0	0	0	0	0	0	0	0	0		1	1	0	0	NO RED	0
1975	1	1	2008	1	0	0	0	0	0	0	0	0	0	0	0	0		1	1	0	0	NO RED	0
1976	1	1	2008	1	0	0	0	0	0	0	0	0	0	0	0	0		1	1	0	0	NO RED	0
1977	1	1	2008	1	0	0	0	0	0	0	0	0	0	0	0	0		1	1	0	0	NO RED	0
1978	1	1	2008	1	0	0	0	0	0	0	0	0	0	0	0	0		1	1	0	0	NO RED	0
1979	1	1	2008	1	0	0	0	0	0	0	0	0	0	0	0	0		1	1	0	0	NO RED	0
1980	1	2	2008	1	0	0	0	0	0	0	0	0	0	0	0	0		2	1	0	0	NO RED	0
1981	1	2	2008	1	0	0	0	0	0	0	0	0	0	0	0	0		2	1	0	0	NO RED	0
1982	1	2	2008	1	0	0	0	0	0	0	0	0	0	0	0	0		2	1	0	0	NO RED	0
1983	1	2	2008	1	0	0	0	0	0	0	0	0	0	0	0	0		2	1	0	0	NO RED	0
1984	1	2	2008	1	0	0	0	0	0	0	0	0	0	0	0	0		2	1	0	0	NO RED	0
1985	1	2	2008	1	0	0	0	0	0	0	0	0	0	0	0	0		2	1	0	0	NO RED	0
1986	1	2	2008	1	0	0	0	0	0	0	0	0	0	0	0	0		2	1	0	0	NO RED	0
1987	1	2	2008	1	0	0	0	0	0	0	0	0	0	0	0	0		2	1	0	0	NO RED	0
1988	1	2	2008	1	0	0	0	0	0	0	0	0	0	0	0	0		2	1	0	0	NO RED	0
1989	1	2	2008	1	0	0	0	0	0	0	0	0	0	0	0	0		2	1	0	0	NO RED	0
1990	1	2	2008	1	0	0	0	0	0	0	0	0	0	0	0	0		2	1	0	0	NO RED	0
1991	1	2	2008	1	0	0	0	0	0	0	0	0	0	0	0	0		2	1	0	0	NO RED	0
1992	1	2	2008	1	0	0	0	0	0	0	0	0	0	0	0	0		2	1	0	0	NO RED	0
1993	1	2	2008	1	0	0	0	0	0	0	0	0	0	0	0	0		2	1	0	0	NO RED	0
1994	1	2	2008	1	0	0	0	0	0	0	0	0	0	0	0	0		2	1	0	0	NO RED	0
1995	1	2	2008	1	0	0	0	0	0	0	0	0	0	0	0	0		2	1	0	0	NO RED	0
1996	1	2	2008	1	0	0	0	0	0	0	0	0	0	0	0	0		2	1	0	0	NO RED	0
1997	1	2	2008	1	0	0	0	0	0	0	0	0	0	0	0	0		2	1	0	0	NO RED	0
1998	1	2	2008	1	0	0	0	0	0	0	0	0	0	0	0	0		2	1	0	0	NO RED	0
1999	1	2	2008	1	0	0	0	0	0	0	0	0	0	0	0	0		2	1	0	0	NO RED	0
[truncated: 7,294 more rows]

## Sheet: adults AS-SPSS
#	No	SITE	month	year	ARTEMIA	FL	FF	WS	BG	FT	EA	AT	AM	GS	GSP	all/M	SR	SR inf	sex	stage	colour2	colour3	PREV
1	1	2	10	2008	2	0	0	0	0	0	0	0	0	0	0	0	0		2	1	0	0	0
2	2	2	10	2008	2	0	0	0	0	0	0	0	0	0	0	0	0		2	1	0	0	0
3	3	2	10	2008	2	0	0	0	0	0	0	0	0	0	0	0	0		2	1	0	0	0
4	4	2	10	2008	2	0	0	0	0	0	0	0	0	0	0	0	0		2	1	0	0	0
5	5	2	10	2008	2	0	0	0	0	0	0	0	0	0	0	0	0		2	1	0	0	0
6	6	2	10	2008	2	0	0	0	0	0	0	0	0	0	0	0	0		2	1	0	0	0
7	7	2	10	2008	2	0	0	0	0	0	0	0	0	0	0	0	0		2	1	0	0	0
8	8	2	10	2008	2	0	0	0	0	0	0	0	0	0	0	0	0		2	1	0	0	0
9	9	2	10	2008	2	0	0	0	0	0	0	0	0	0	0	0	0		2	1	0	0	0
10	10	2	10	2008	2	0	0	0	0	0	0	0	0	0	0	0	0		2	1	0	0	0
11	1	2	1	2009	2	1	0	0	0	0	0	0	0	0	0	1	1	1	1	1	0	0	1
12	2	2	1	2009	2	2	0	0	0	0	0	0	0	0	0	2	1	1	1	1	0	0	1
13	3	2	1	2009	2	0	0	0	0	0	0	0	0	0	0	0	0		2	1	0	0	0
14	4	2	1	2009	2	0	0	0	0	0	0	0	0	0	0	0	0		2	1	0	0	0
1	1	3	1	2009	2	1	0	0	0	0	0	0	0	0	0	1	1	1	1	1	0	0	1
2	2	3	1	2009	2	0	0	0	0	0	0	0	0	0	0	0	0		1	1	0	0	0
3	3	3	1	2009	2	0	0	0	0	0	0	0	0	0	0	0	0		1	1	0	0	0
4	4	3	1	2009	2	0	0	0	0	0	0	0	0	0	0	0	0		1	1	0	0	0
5	5	3	1	2009	2	0	0	0	0	0	0	0	0	0	0	0	0		1	1	0	0	0
6	6	3	1	2009	2	0	0	0	0	0	0	0	0	0	0	0	0		1	1	0	0	0
7	7	3	1	2009	2	0	0	0	0	0	0	0	0	0	0	0	0		1	1	0	0	0
8	8	3	1	2009	2	0	0	0	0	0	0	0	0	0	0	0	0		1	1	0	0	0
9	9	3	1	2009	2	0	0	0	0	0	0	0	0	0	0	0	0		1	1	0	0	0
10	10	3	1	2009	2	0	0	0	0	0	0	0	0	0	0	0	0		1	1	0	0	0
11	11	3	1	2009	2	0	0	0	0	0	0	0	0	0	0	0	0		1	1	0	0	0
12	12	3	1	2009	2	0	0	0	0	0	0	0	0	0	0	0	0		1	1	0	0	0
13	13	3	1	2009	2	0	0	0	0	0	0	0	0	0	0	0	0		1	1	0	0	0
14	14	3	1	2009	2	0	0	0	0	0	0	0	0	0	0	0	0		1	1	0	0	0
15	15	3	1	2009	2	0	0	0	0	0	0	0	0	0	0	0	0		1	1	0	0	0
16	16	3	1	2009	2	0	0	0	0	0	0	0	0	0	0	0	0		1	1	0	0	0
17	17	3	1	2009	2	0	0	0	0	0	0	0	0	0	0	0	0		1	1	0	0	0
18	18	3	1	2009	2	0	0	0	0	0	0	0	0	0	0	0	0		1	1	0	0	0
19	19	3	1	2009	2	0	0	0	0	0	0	0	0	0	0	0	0		1	1	0	0	0
20	20	3	1	2009	2	0	0	0	0	0	0	0	0	0	0	0	0		1	1	0	0	0
21	21	3	1	2009	2	0	0	0	0	0	0	0	0	0	0	0	0		1	1	0	0	0
22	22	3	1	2009	2	0	0	0	0	0	0	0	0	0	0	0	0		1	1	0	0	0
23	23	3	1	2009	2	0	0	0	0	0	0	0	0	0	0	0	0		1	1	0	0	0
24	24	3	1	2009	2	0	0	0	0	0	0	0	0	0	0	0	0		1	1	0	0	0
25	25	3	1	2009	2	0	0	0	0	0	0	0	0	0	0	0	0		1	1	0	0	0
26	26	3	1	2009	2	0	0	0	0	0	0	0	0	0	0	0	0		1	1	0	0	0
27	27	3	1	2009	2	0	0	0	0	0	0	0	0	0	0	0	0		1	1	0	0	0
28	28	3	1	2009	2	0	0	0	0	0	0	0	0	0	0	0	0		1	1	0	0	0
29	29	3	1	2009	2	0	0	0	0	0	0	0	0	0	0	0	0		1	1	0	0	0
30	30	3	1	2009	2	0	0	0	0	0	0	0	0	0	0	0	0		1	1	0	0	0
31	31	3	1	2009	2	0	0	0	0	0	0	0	0	0	0	0	0		1	1	0	0	0
32	32	3	1	2009	2	0	0	0	0	0	0	0	0	0	0	0	0		1	1	0	0	0
33	33	3	1	2009	2	0	0	0	0	0	0	0	0	0	0	0	0		2	1	0	0	0
34	34	3	1	2009	2	0	0	0	0	0	0	0	0	0	0	0	0		2	1	0	0	0
35	35	3	1	2009	2	0	0	0	0	0	0	0	0	0	0	0	0		2	1	0	0	0
36	36	3	1	2009	2	0	0	0	0	0	0	0	0	0	0	0	0		2	1	0	0	0
37	37	3	1	2009	2	0	0	0	0	0	0	0	0	0	0	0	0		2	1	0	0	0
38	38	3	1	2009	2	0	0	0	0	0	0	0	0	0	0	0	0		2	1	0	0	0
39	39	3	1	2009	2	0	0	0	0	0	0	0	0	0	0	0	0		2	1	0	0	0
40	40	3	1	2009	2	0	0	0	0	0	0	0	0	0	0	0	0		2	1	0	0	0
41	41	3	1	2009	2	0	0	0	0	0	0	0	0	0	0	0	0		2	1	0	0	0
42	42	3	1	2009	2	0	0	0	0	0	0	0	0	0	0	0	0		2	1	0	0	0
1	43	3	2	2009	2	0	0	0	0	0	0	0	0	0	1	1	1	1	2	1	0	0	1
2	44	3	2	2009	2	1	0	0	0	0	0	0	0	0	0	1	1	1	1	1	0	0	1
3	45	3	2	2009	2	1	0	0	0	0	0	0	0	0	0	1	1	1	1	1	0	0	1
4	46	3	2	2009	2	0	0	0	0	0	0	0	0	0	1	1	1	1	2	1	0	0	1
5	47	3	2	2009	2	0	1	0	0	0	0	0	0	0	0	1	1	1	1	1	0	0	1
6	48	3	2	2009	2	1	1	0	0	0	0	0	0	0	0	2	2	2	1	1	0	0	1
7	49	3	2	2009	2	2	0	0	0	0	0	0	0	0	0	2	1	1	1	1	0	0	1
8	50	3	2	2009	2	0	0	0	0	0	0	0	0	0	0	0	0		2	1	0	0	0
9	51	3	2	2009	2	0	0	0	0	0	0	0	0	0	0	0	0		2	1	0	0	0
10	52	3	2	2009	2	0	0	0	0	0	0	0	0	0	0	0	0		2	1	0	0	0
11	53	3	2	2009	2	0	0	0	0	0	0	0	0	0	0	0	0		2	1	0	0	0
12	54	3	2	2009	2	0	0	0	0	0	0	0	0	0	0	0	0		2	1	0	0	0
13	55	3	2	2009	2	0	0	0	0	0	0	0	0	0	0	0	0		2	1	0	0	0
14	56	3	2	2009	2	0	0	0	0	0	0	0	0	0	0	0	0		2	1	0	0	0
15	57	3	2	2009	2	0	0	0	0	0	0	0	0	0	0	0	0		2	1	0	0	0
16	58	3	2	2009	2	0	0	0	0	0	0	0	0	0	0	0	0		2	1	0	0	0
17	59	3	2	2009	2	0	0	0	0	0	0	0	0	0	0	0	0		2	1	0	0	0
18	60	3	2	2009	2	0	0	0	0	0	0	0	0	0	0	0	0		1	1	0	0	0
19	61	3	2	2009	2	0	0	0	0	0	0	0	0	0	0	0	0		1	1	0	0	0
20	62	3	2	2009	2	0	0	0	0	0	0	0	0	0	0	0	0		1	1	0	0	0
21	63	3	2	2009	2	0	0	0	0	0	0	0	0	0	0	0	0		1	1	0	0	0
22	64	3	2	2009	2	0	0	0	0	0	0	0	0	0	0	0	0		1	1	0	0	0
23	65	3	2	2009	2	0	0	0	0	0	0	0	0	0	0	0	0		1	1	0	0	0
24	66	3	2	2009	2	0	0	0	0	0	0	0	0	0	0	0	0		1	1	0	0	0
25	67	3	2	2009	2	0	0	0	0	0	0	0	0	0	0	0	0		1	1	0	0	0
26	68	3	2	2009	2	0	0	0	0	0	0	0	0	0	0	0	0		1	1	0	0	0
27	69	3	2	2009	2	0	0	0	0	0	0	0	0	0	0	0	0		1	1	0	0	0
28	70	3	2	2009	2	0	0	0	0	0	0	0	0	0	0	0	0		1	1	0	0	0
29	71	3	2	2009	2	0	0	0	0	0	0	0	0	0	0	0	0		1	1	0	0	0
30	72	3	2	2009	2	0	0	0	0	0	0	0	0	0	0	0	0		1	1	0	0	0
31	73	3	2	2009	2	0	0	0	0	0	0	0	0	0	0	0	0		1	1	0	0	0
32	74	3	2	2009	2	0	0	0	0	0	0	0	0	0	0	0	0		1	1	0	0	0
33	75	3	2	2009	2	0	0	0	0	0	0	0	0	0	0	0	0		1	1	0	0	0
34	76	3	2	2009	2	0	0	0	0	0	0	0	0	0	0	0	0		1	1	0	0	0
35	77	3	2	2009	2	0	0	0	0	0	0	0	0	0	0	0	0		1	1	0	0	0
36	78	3	2	2009	2	0	0	0	0	0	0	0	0	0	0	0	0		1	1	0	0	0
37	79	3	2	2009	2	0	0	0	0	0	0	0	0	0	0	0	0		1	1	0	0	0
38	80	3	2	2009	2	0	0	0	0	0	0	0	0	0	0	0	0		1	1	0	0	0
39	81	3	2	2009	2	0	0	0	0	0	0	0	0	0	0	0	0		1	1	0	0	0
40	82	3	2	2009	2	0	0	0	0	0	0	0	0	0	0	0	0		1	1	0	0	0
41	83	3	2	2009	2	0	0	0	0	0	0	0	0	0	0	0	0		1	1	0	0	0
42	84	3	2	2009	2	0	0	0	0	0	0	0	0	0	0	0	0		1	1	0	0	0
43	85	3	2	2009	2	0	0	0	0	0	0	0	0	0	0	0	0		1	1	0	0	0
44	86	3	2	2009	2	0	0	0	0	0	0	0	0	0	0	0	0		1	1	0	0	0
45	87	3	2	2009	2	0	0	0	0	0	0	0	0	0	0	0	0		1	1	0	0	0
46	88	3	2	2009	2	0	0	0	0	0	0	0	0	0	0	0	0		1	1	0	0	0
47	89	3	2	2009	2	0	0	0	0	0	0	0	0	0	0	0	0		1	1	0	0	0
48	90	3	2	2009	2	0	0	0	0	0	0	0	0	0	0	0	0		1	1	0	0	0
49	91	3	2	2009	2	0	0	0	0	0	0	0	0	0	0	0	0		1	1	0	0	0
50	92	3	2	2009	2	0	0	0	0	0	0	0	0	0	0	0	0		1	1	0	0	0
51	93	3	2	2009	2	0	0	0	0	0	0	0	0	0	0	0	0		1	1	0	0	0
52	94	3	2	2009	2	0	0	0	0	0	0	0	0	0	0	0	0		1	1	0	0	0
53	95	3	2	2009	2	0	0	0	0	0	0	0	0	0	0	0	0		1	1	0	0	0
54	96	3	2	2009	2	0	0	0	0	0	0	0	0	0	0	0	0		1	1	0	0	0
55	97	3	2	2009	2	0	0	0	0	0	0	0	0	0	0	0	0		1	1	0	0	0
56	98	3	2	2009	2	0	0	0	0	0	0	0	0	0	0	0	0		1	1	0	0	0
57	99	3	2	2009	2	0	0	0	0	0	0	0	0	0	0	0	0		1	1	0	0	0
1	100	3	3	2009	2	1	0	0	0	0	0	0	0	0	0	1	1	1	2	1	0	0	1
2	101	3	3	2009	2	0	0	0	0	0	0	0	0	0	1	1	1	1	2	1	0	0	1
3	102	3	3	2009	2	1	0	0	0	0	0	0	0	0	0	1	1	1	1	1	0	0	1
4	103	3	3	2009	2	1	0	0	0	0	0	0	0	0	0	1	1	1	1	1	0	0	1
5	104	3	3	2009	2	1	0	0	0	0	0	0	0	0	0	1	1	1	1	1	0	0	1
6	105	3	3	2009	2	1	0	0	0	0	0	0	0	0	0	1	1	1	1	1	0	0	1
7	106	3	3	2009	2	1	0	0	0	0	0	0	0	0	0	1	1	1	2	1	0	0	1
8	107	3	3	2009	2	0	0	0	0	0	1	0	0	0	0	1	1	1	2	1	0	0	1
9	108	3	3	2009	2	0	0	0	0	0	1	0	0	0	0	1	1	1	2	1	0	0	1
10	109	3	3	2009	2	0	0	0	0	0	1	0	0	0	0	1	1	1	1	1	0	0	1
11	110	3	3	2009	2	0	0	0	0	0	1	0	0	0	0	1	1	1	1	1	0	0	1
12	111	3	3	2009	2	1	0	0	0	0	0	0	0	0	0	1	1	1	1	1	0	0	1
13	112	3	3	2009	2	1	0	0	0	0	0	0	0	0	0	1	1	1	1	1	0	0	1
14	113	3	3	2009	2	1	0	0	0	0	0	0	0	0	0	1	1	1	1	1	0	0	1
15	114	3	3	2009	2	2	0	0	0	0	0	0	0	0	0	2	1	1	1	1	0	0	1
16	115	3	3	2009	2	2	0	0	0	0	0	0	0	0	0	2	1	1	1	1	0	0	1
17	116	3	3	2009	2	1	0	0	0	0	0	0	0	0	0	1	1	1	1	1	0	0	1
18	117	3	3	2009	2	0	0	1	0	0	0	0	0	0	0	1	1	1	1	1	0	0	1
19	118	3	3	2009	2	0	0	0	0	0	1	0	0	0	0	1	1	1	1	1	0	0	1
20	119	3	3	2009	2	1	0	0	0	0	0	0	0	0	0	1	1	1	1	1	0	0	1
21	120	3	3	2009	2	1	0	0	0	0	0	0	0	0	0	1	1	1	1	1	0	0	1
22	121	3	3	2009	2	1	0	0	0	0	0	0	0	0	0	1	1	1	1	1	0	0	1
23	122	3	3	2009	2	2	0	0	0	0	0	0	0	0	0	2	1	1	1	1	0	0	1
24	123	3	3	2009	2	1	0	0	0	0	0	0	0	0	0	1	1	1	1	1	0	0	1
25	124	3	3	2009	2	1	0	0	0	0	0	0	0	0	0	1	1	1	1	1	0	0	1
26	125	3	3	2009	2	1	0	0	0	0	0	0	0	0	0	1	1	1	2	1	0	0	1
27	126	3	3	2009	2	1	0	0	0	0	0	0	0	0	0	1	1	1	2	1	0	0	1
28	127	3	3	2009	2	1	0	0	0	0	0	0	0	0	0	1	1	1	2	1	0	0	1
29	128	3	3	2009	2	1	0	0	0	0	0	0	0	0	0	1	1	1	2	1	0	0	1
30	129	3	3	2009	2	1	0	0	0	0	0	0	0	0	0	1	1	1	2	1	0	0	1
31	130	3	3	2009	2	0	0	0	0	0	0	0	0	0	0	0	0		2	1	0	0	0
32	131	3	3	2009	2	0	0	0	0	0	0	0	0	0	0	0	0		2	1	0	0	0
33	132	3	3	2009	2	0	0	0	0	0	0	0	0	0	0	0	0		2	1	0	0	0
34	133	3	3	2009	2	0	0	0	0	0	0	0	0	0	0	0	0		2	1	0	0	0
35	134	3	3	2009	2	0	0	0	0	0	0	0	0	0	0	0	0		2	1	0	0	0
36	135	3	3	2009	2	0	0	0	0	0	0	0	0	0	0	0	0		2	1	0	0	0
37	136	3	3	2009	2	0	0	0	0	0	0	0	0	0	0	0	0		2	1	0	0	0
38	137	3	3	2009	2	0	0	0	0	0	0	0	0	0	0	0	0		2	1	0	0	0
39	138	3	3	2009	2	0	0	0	0	0	0	0	0	0	0	0	0		2	1	0	0	0
40	139	3	3	2009	2	0	0	0	0	0	0	0	0	0	0	0	0		2	1	0	0	0
41	140	3	3	2009	2	0	0	0	0	0	0	0	0	0	0	0	0		2	1	0	0	0
42	141	3	3	2009	2	0	0	0	0	0	0	0	0	0	0	0	0		2	1	0	0	0
43	142	3	3	2009	2	0	0	0	0	0	0	0	0	0	0	0	0		2	1	0	0	0
44	143	3	3	2009	2	0	0	0	0	0	0	0	0	0	0	0	0		2	1	0	0	0
45	144	3	3	2009	2	0	0	0	0	0	0	0	0	0	0	0	0		2	1	0	0	0
46	145	3	3	2009	2	0	0	0	0	0	0	0	0	0	0	0	0		2	1	0	0	0
47	146	3	3	2009	2	0	0	0	0	0	0	0	0	0	0	0	0		2	1	0	0	0
48	147	3	3	2009	2	0	0	0	0	0	0	0	0	0	0	0	0		2	1	0	0	0
49	148	3	3	2009	2	0	0	0	0	0	0	0	0	0	0	0	0		2	1	0	0	0
50	149	3	3	2009	2	0	0	0	0	0	0	0	0	0	0	0	0		2	1	0	0	0
51	150	3	3	2009	2	0	0	0	0	0	0	0	0	0	0	0	0		2	1	0	0	0
52	151	3	3	2009	2	0	0	0	0	0	0	0	0	0	0	0	0		2	1	0	0	0
53	152	3	3	2009	2	0	0	0	0	0	0	0	0	0	0	0	0		2	1	0	0	0
54	153	3	3	2009	2	0	0	0	0	0	0	0	0	0	0	0	0		2	1	0	0	0
55	154	3	3	2009	2	0	0	0	0	0	0	0	0	0	0	0	0		2	1	0	0	0
56	155	3	3	2009	2	0	0	0	0	0	0	0	0	0	0	0	0		2	1	0	0	0
57	156	3	3	2009	2	0	0	0	0	0	0	0	0	0	0	0	0		2	1	0	0	0
58	157	3	3	2009	2	0	0	0	0	0	0	0	0	0	0	0	0		2	1	0	0	0
59	158	3	3	2009	2	0	0	0	0	0	0	0	0	0	0	0	0		2	1	0	0	0
60	159	3	3	2009	2	0	0	0	0	0	0	0	0	0	0	0	0		2	1	0	0	0
61	160	3	3	2009	2	0	0	0	0	0	0	0	0	0	0	0	0		2	1	0	0	0
62	161	3	3	2009	2	0	0	0	0	0	0	0	0	0	0	0	0		2	1	0	0	0
63	162	3	3	2009	2	0	0	0	0	0	0	0	0	0	0	0	0		2	1	0	0	0
64	163	3	3	2009	2	0	0	0	0	0	0	0	0	0	0	0	0		2	1	0	0	0
65	164	3	3	2009	2	0	0	0	0	0	0	0	0	0	0	0	0		2	1	0	0	0
66	165	3	3	2009	2	0	0	0	0	0	0	0	0	0	0	0	0		2	1	0	0	0
67	166	3	3	2009	2	0	0	0	0	0	0	0	0	0	0	0	0		2	1	0	0	0
68	167	3	3	2009	2	0	0	0	0	0	0	0	0	0	0	0	0		2	1	0	0	0
69	168	3	3	2009	2	0	0	0	0	0	0	0	0	0	0	0	0		2	1	0	0	0
70	169	3	3	2009	2	0	0	0	0	0	0	0	0	0	0	0	0		2	1	0	0	0
71	170	3	3	2009	2	0	0	0	0	0	0	0	0	0	0	0	0		2	1	0	0	0
72	171	3	3	2009	2	0	0	0	0	0	0	0	0	0	0	0	0		2	1	0	0	0
73	172	3	3	2009	2	0	0	0	0	0	0	0	0	0	0	0	0		2	1	0	0	0
74	173	3	3	2009	2	0	0	0	0	0	0	0	0	0	0	0	0		2	1	0	0	0
75	174	3	3	2009	2	0	0	0	0	0	0	0	0	0	0	0	0		2	1	0	0	0
76	175	3	3	2009	2	0	0	0	0	0	0	0	0	0	0	0	0		2	1	0	0	0
77	176	3	3	2009	2	0	0	0	0	0	0	0	0	0	0	0	0		2	1	0	0	0
78	177	3	3	2009	2	0	0	0	0	0	0	0	0	0	0	0	0		2	1	0	0	0
79	178	3	3	2009	2	0	0	0	0	0	0	0	0	0	0	0	0		2	1	0	0	0
80	179	3	3	2009	2	0	0	0	0	0	0	0	0	0	0	0	0		2	1	0	0	0
81	180	3	3	2009	2	0	0	0	0	0	0	0	0	0	0	0	0		2	1	0	0	0
82	181	3	3	2009	2	0	0	0	0	0	0	0	0	0	0	0	0		2	1	0	0	0
83	182	3	3	2009	2	0	0	0	0	0	0	0	0	0	0	0	0		2	1	0	0	0
84	183	3	3	2009	2	0	0	0	0	0	0	0	0	0	0	0	0		2	1	0	0	0
85	184	3	3	2009	2	0	0	0	0	0	0	0	0	0	0	0	0		2	1	0	0	0
86	185	3	3	2009	2	0	0	0	0	0	0	0	0	0	0	0	0		2	1	0	0	0
87	186	3	3	2009	2	0	0	0	0	0	0	0	0	0	0	0	0		1	1	0	0	0
88	187	3	3	2009	2	0	0	0	0	0	0	0	0	0	0	0	0		1	1	0	0	0
89	188	3	3	2009	2	0	0	0	0	0	0	0	0	0	0	0	0		1	1	0	0	0
90	189	3	3	2009	2	0	0	0	0	0	0	0	0	0	0	0	0		1	1	0	0	0
91	190	3	3	2009	2	0	0	0	0	0	0	0	0	0	0	0	0		1	1	0	0	0
92	191	3	3	2009	2	0	0	0	0	0	0	0	0	0	0	0	0		1	1	0	0	0
93	192	3	3	2009	2	0	0	0	0	0	0	0	0	0	0	0	0		1	1	0	0	0
94	193	3	3	2009	2	0	0	0	0	0	0	0	0	0	0	0	0		1	1	0	0	0
95	194	3	3	2009	2	0	0	0	0	0	0	0	0	0	0	0	0		1	1	0	0	0
96	195	3	3	2009	2	0	0	0	0	0	0	0	0	0	0	0	0		1	1	0	0	0
97	196	3	3	2009	2	0	0	0	0	0	0	0	0	0	0	0	0		1	1	0	0	0
98	197	3	3	2009	2	0	0	0	0	0	0	0	0	0	0	0	0		1	1	0	0	0
99	198	3	3	2009	2	0	0	0	0	0	0	0	0	0	0	0	0		1	1	0	0	0
100	199	3	3	2009	2	0	0	0	0	0	0	0	0	0	0	0	0		1	1	0	0	0
101	200	3	3	2009	2	0	0	0	0	0	0	0	0	0	0	0	0		1	1	0	0	0
102	201	3	3	2009	2	0	0	0	0	0	0	0	0	0	0	0	0		1	1	0	0	0
103	202	3	3	2009	2	0	0	0	0	0	0	0	0	0	0	0	0		1	1	0	0	0
104	203	3	3	2009	2	0	0	0	0	0	0	0	0	0	0	0	0		1	1	0	0	0
105	204	3	3	2009	2	0	0	0	0	0	0	0	0	0	0	0	0		1	1	0	0	0
106	205	3	3	2009	2	0	0	0	0	0	0	0	0	0	0	0	0		1	1	0	0	0
107	206	3	3	2009	2	0	0	0	0	0	0	0	0	0	0	0	0		1	1	0	0	0
108	207	3	3	2009	2	0	0	0	0	0	0	0	0	0	0	0	0		1	1	0	0	0
109	208	3	3	2009	2	0	0	0	0	0	0	0	0	0	0	0	0		1	1	0	0	0
110	209	3	3	2009	2	0	0	0	0	0	0	0	0	0	0	0	0		1	1	0	0	0
111	210	3	3	2009	2	0	0	0	0	0	0	0	0	0	0	0	0		1	1	0	0	0
112	211	3	3	2009	2	0	0	0	0	0	0	0	0	0	0	0	0		1	1	0	0	0
113	212	3	3	2009	2	0	0	0	0	0	0	0	0	0	0	0	0		1	1	0	0	0
114	213	3	3	2009	2	0	0	0	0	0	0	0	0	0	0	0	0		1	1	0	0	0
115	214	3	3	2009	2	0	0	0	0	0	0	0	0	0	0	0	0		1	1	0	0	0
116	215	3	3	2009	2	0	0	0	0	0	0	0	0	0	0	0	0		1	1	0	0	0
117	216	3	3	2009	2	0	0	0	0	0	0	0	0	0	0	0	0		1	1	0	0	0
118	217	3	3	2009	2	0	0	0	0	0	0	0	0	0	0	0	0		1	1	0	0	0
119	218	3	3	2009	2	0	0	0	0	0	0	0	0	0	0	0	0		1	1	0	0	0
120	219	3	3	2009	2	0	0	0	0	0	0	0	0	0	0	0	0		1	1	0	0	0
121	220	3	3	2009	2	0	0	0	0	0	0	0	0	0	0	0	0		1	1	0	0	0
122	221	3	3	2009	2	0	0	0	0	0	0	0	0	0	0	0	0		1	1	0	0	0
123	222	3	3	2009	2	0	0	0	0	0	0	0	0	0	0	0	0		1	1	0	0	0
124	223	3	3	2009	2	0	0	0	0	0	0	0	0	0	0	0	0		1	1	0	0	0
125	224	3	3	2009	2	0	0	0	0	0	0	0	0	0	0	0	0		1	1	0	0	0
126	225	3	3	2009	2	0	0	0	0	0	0	0	0	0	0	0	0		1	1	0	0	0
127	226	3	3	2009	2	0	0	0	0	0	0	0	0	0	0	0	0		1	1	0	0	0
128	227	3	3	2009	2	0	0	0	0	0	0	0	0	0	0	0	0		1	1	0	0	0
129	228	3	3	2009	2	0	0	0	0	0	0	0	0	0	0	0	0		1	1	0	0	0
130	229	3	3	2009	2	0	0	0	0	0	0	0	0	0	0	0	0		1	1	0	0	0
131	230	3	3	2009	2	0	0	0	0	0	0	0	0	0	0	0	0		1	1	0	0	0
132	231	3	3	2009	2	0	0	0	0	0	0	0	0	0	0	0	0		1	1	0	0	0
133	232	3	3	2009	2	0	0	0	0	0	0	0	0	0	0	0	0		1	1	0	0	0
134	233	3	3	2009	2	0	0	0	0	0	0	0	0	0	0	0	0		1	1	0	0	0
135	234	3	3	2009	2	0	0	0	0	0	0	0	0	0	0	0	0		1	1	0	0	0
136	235	3	3	2009	2	0	0	0	0	0	0	0	0	0	0	0	0		1	1	0	0	0
137	236	3	3	2009	2	0	0	0	0	0	0	0	0	0	0	0	0		1	1	0	0	0
138	237	3	3	2009	2	0	0	0	0	0	0	0	0	0	0	0	0		1	1	0	0	0
139	238	3	3	2009	2	0	0	0	0	0	0	0	0	0	0	0	0		1	1	0	0	0
140	239	3	3	2009	2	0	0	0	0	0	0	0	0	0	0	0	0		1	1	0	0	0
141	240	3	3	2009	2	0	0	0	0	0	0	0	0	0	0	0	0		1	1	0	0	0
142	241	3	3	2009	2	0	0	0	0	0	0	0	0	0	0	0	0		1	1	0	0	0
143	242	3	3	2009	2	0	0	0	0	0	0	0	0	0	0	0	0		1	1	0	0	0
144	243	3	3	2009	2	0	0	0	0	0	0	0	0	0	0	0	0		1	1	0	0	0
145	244	3	3	2009	2	0	0	0	0	0	0	0	0	0	0	0	0		1	1	0	0	0
146	245	3	3	2009	2	0	0	0	0	0	0	0	0	0	0	0	0		1	1	0	0	0
147	246	3	3	2009	2	0	0	0	0	0	0	0	0	0	0	0	0		1	1	0	0	0
148	247	3	3	2009	2	0	0	0	0	0	0	0	0	0	0	0	0		1	1	0	0	0
149	248	3	3	2009	2	0	0	0	0	0	0	0	0	0	0	0	0		1	1	0	0	0
150	249	3	3	2009	2	0	0	0	0	0	0	0	0	0	0	0	0		1	1	0	0	0
151	250	3	3	2009	2	0	0	0	0	0	0	0	0	0	0	0	0		1	1	0	0	0
152	251	3	3	2009	2	0	0	0	0	0	0	0	0	0	0	0	0		1	1	0	0	0
153	252	3	3	2009	2	0	0	0	0	0	0	0	0	0	0	0	0		1	1	0	0	0
154	253	3	3	2009	2	0	0	0	0	0	0	0	0	0	0	0	0		1	1	0	0	0
155	254	3	3	2009	2	0	0	0	0	0	0	0	0	0	0	0	0		1	1	0	0	0
156	255	3	3	2009	2	0	0	0	0	0	0	0	0	0	0	0	0		1	1	0	0	0
157	256	3	3	2009	2	0	0	0	0	0	0	0	0	0	0	0	0		1	1	0	0	0
158	257	3	3	2009	2	0	0	0	0	0	0	0	0	0	0	0	0		1	1	0	0	0
159	258	3	3	2009	2	0	0	0	0	0	0	0	0	0	0	0	0		1	1	0	0	0
160	259	3	3	2009	2	0	0	0	0	0	0	0	0	0	0	0	0		1	1	0	0	0
161	260	3	3	2009	2	0	0	0	0	0	0	0	0	0	0	0	0		1	1	0	0	0
162	261	3	3	2009	2	0	0	0	0	0	0	0	0	0	0	0	0		1	1	0	0	0
163	262	3	3	2009	2	0	0	0	0	0	0	0	0	0	0	0	0		1	1	0	0	0
164	263	3	3	2009	2	0	0	0	0	0	0	0	0	0	0	0	0		1	1	0	0	0
165	264	3	3	2009	2	0	0	0	0	0	0	0	0	0	0	0	0		1	1	0	0	0
166	265	3	3	2009	2	0	0	0	0	0	0	0	0	0	0	0	0		1	1	0	0	0
167	266	3	3	2009	2	0	0	0	0	0	0	0	0	0	0	0	0		1	1	0	0	0
168	267	3	3	2009	2	0	0	0	0	0	0	0	0	0	0	0	0		1	1	0	0	0
169	268	3	3	2009	2	0	0	0	0	0	0	0	0	0	0	0	0		1	1	0	0	0
170	269	3	3	2009	2	0	0	0	0	0	0	0	0	0	0	0	0		1	1	0	0	0
171	270	3	3	2009	2	0	0	0	0	0	0	0	0	0	0	0	0		1	1	0	0	0
172	271	3	3	2009	2	0	0	0	0	0	0	0	0	0	0	0	0		1	1	0	0	0
173	272	3	3	2009	2	0	0	0	0	0	0	0	0	0	0	0	0		1	1	0	0	0
174	273	3	3	2009	2	0	0	0	0	0	0	0	0	0	0	0	0		1	1	0	0	0
175	274	3	3	2009	2	0	0	0	0	0	0	0	0	0	0	0	0		1	1	0	0	0
176	275	3	3	2009	2	0	0	0	0	0	0	0	0	0	0	0	0		1	1	0	0	0
177	276	3	3	2009	2	0	0	0	0	0	0	0	0	0	0	0	0		1	1	0	0	0
178	277	3	3	2009	2	0	0	0	0	0	0	0	0	0	0	0	0		1	1	0	0	0
179	278	3	3	2009	2	0	0	0	0	0	0	0	0	0	0	0	0		1	1	0	0	0
180	279	3	3	2009	2	0	0	0	0	0	0	0	0	0	0	0	0		1	1	0	0	0
181	280	3	3	2009	2	0	0	0	0	0	0	0	0	0	0	0	0		1	1	0	0	0
182	281	3	3	2009	2	0	0	0	0	0	0	0	0	0	0	0	0		1	1	0	0	0
183	282	3	3	2009	2	0	0	0	0	0	0	0	0	0	0	0	0		1	1	0	0	0
184	283	3	3	2009	2	0	0	0	0	0	0	0	0	0	0	0	0		1	1	0	0	0
185	284	3	3	2009	2	0	0	0	0	0	0	0	0	0	0	0	0		1	1	0	0	0
186	285	3	3	2009	2	0	0	0	0	0	0	0	0	0	0	0	0		1	1	0	0	0
187	286	3	3	2009	2	0	0	0	0	0	0	0	0	0	0	0	0		1	1	0	0	0
188	287	3	3	2009	2	0	0	0	0	0	0	0	0	0	0	0	0		1	1	0	0	0
189	288	3	3	2009	2	0	0	0	0	0	0	0	0	0	0	0	0		1	1	0	0	0
190	289	3	3	2009	2	0	0	0	0	0	0	0	0	0	0	0	0		1	1	0	0	0
191	290	3	3	2009	2	0	0	0	0	0	0	0	0	0	0	0	0		1	1	0	0	0
192	291	3	3	2009	2	0	0	0	0	0	0	0	0	0	0	0	0		1	1	0	0	0
193	292	3	3	2009	2	0	0	0	0	0	0	0	0	0	0	0	0		1	1	0	0	0
194	293	3	3	2009	2	0	0	0	0	0	0	0	0	0	0	0	0		1	1	0	0	0
195	294	3	3	2009	2	0	0	0	0	0	0	0	0	0	0	0	0		1	1	0	0	0
196	295	3	3	2009	2	0	0	0	0	0	0	0	0	0	0	0	0		1	1	0	0	0
197	296	3	3	2009	2	0	0	0	0	0	0	0	0	0	0	0	0		1	1	0	0	0
198	297	3	3	2009	2	0	0	0	0	0	0	0	0	0	0	0	0		1	1	0	0	0
199	298	3	3	2009	2	0	0	0	0	0	0	0	0	0	0	0	0		1	1	0	0	0
200	299	3	3	2009	2	0	0	0	0	0	0	0	0	0	0	0	0		1	1	0	0	0
201	300	3	3	2009	2	0	0	0	0	0	0	0	0	0	0	0	0		1	1	0	0	0
202	301	3	3	2009	2	0	0	0	0	0	0	0	0	0	0	0	0		1	1	0	0	0
203	302	3	3	2009	2	0	0	0	0	0	0	0	0	0	0	0	0		1	1	0	0	0
204	303	3	3	2009	2	0	0	0	0	0	0	0	0	0	0	0	0		1	1	0	0	0
1	304	3	4	2009	2	2	0	0	0	0	0	0	0	0	0	2	1	1	1	1	0	0	1
2	305	3	4	2009	2	1	0	0	0	0	0	0	0	0	0	1	1	1	1	1	0	0	1
3	306	3	4	2009	2	1	0	0	0	0	0	0	0	0	0	1	1	1	2	1	0	0	1
4	307	3	4	2009	2	1	0	0	0	0	0	0	0	0	0	1	1	1	2	1	0	0	1
5	308	3	4	2009	2	1	0	0	0	0	0	0	0	0	0	1	1	1	2	1	0	0	1
6	309	3	4	2009	2	1	0	0	0	0	0	0	0	0	0	1	1	1	2	1	0	0	1
7	310	3	4	2009	2	0	2	0	0	0	0	0	0	0	0	2	1	1	2	1	0	0	1
8	311	3	4	2009	2	0	0	0	0	0	0	0	0	0	0	0	0		1	1	0	0	0
9	312	3	4	2009	2	0	0	0	0	0	0	0	0	0	0	0	0		1	1	0	0	0
10	313	3	4	2009	2	0	0	0	0	0	0	0	0	0	0	0	0		2	1	0	0	0
1	314	3	5	2009	2	1	0	0	0	0	0	0	0	0	0	1	1	1	1	1	0	0	1
2	315	3	5	2009	2	2	0	0	0	0	0	0	0	0	0	2	1	1	1	1	0	0	1
3	316	3	5	2009	2	1	0	0	0	0	1	0	0	0	0	2	2	2	2	1	1	1	1
4	317	3	5	2009	2	1	0	0	0	0	0	0	0	0	0	1	1	1	2	1	0	0	1
5	318	3	5	2009	2	2	0	0	0	0	0	2	0	0	0	4	2	2	2	1	1	2	1
6	319	3	5	2009	2	1	0	0	0	0	1	1	0	0	0	3	3	3	2	1	1	2	1
7	320	3	5	2009	2	0	0	0	0	0	0	1	0	0	0	1	1	1	2	1	0	0	1
8	321	3	5	2009	2	0	0	0	0	0	0	1	0	0	0	1	1	1	2	1	1	1	1
9	322	3	5	2009	2	0	0	0	0	0	1	0	0	0	0	1	1	1	2	1	0	0	1
10	323	3	5	2009	2	0	0	0	0	0	0	1	0	0	0	1	1	1	2	1	0	0	1
11	324	3	5	2009	2	1	0	0	0	0	0	1	0	0	0	2	2	2	2	1	1	1	1
12	325	3	5	2009	2	0	0	1	0	0	0	0	0	0	0	1	1	1	2	1	0	0	1
13	326	3	5	2009	2	1	0	0	0	0	0	1	0	0	0	2	2	2	2	1	1	1	1
14	327	3	5	2009	2	0	0	0	0	0	0	1	0	0	0	1	1	1	2	1	1	1	1
15	328	3	5	2009	2	2	0	0	0	0	1	0	0	0	0	3	2	2	2	1	0	0	1
16	329	3	5	2009	2	1	0	0	0	0	1	1	0	0	0	3	3	3	2	1	1	2	1
17	330	3	5	2009	2	1	0	0	0	0	0	1	0	0	0	2	2	2	2	1	1	2	1
18	331	3	5	2009	2	1	0	0	0	0	0	1	0	0	0	2	2	2	2	1	1	2	1
19	332	3	5	2009	2	0	0	0	0	0	1	0	0	0	0	1	1	1	2	1	1	2	1
20	333	3	5	2009	2	0	0	0	0	0	0	1	0	0	0	1	1	1	2	1	1	1	1
21	334	3	5	2009	2	1	0	0	0	0	0	1	0	0	0	2	2	2	2	1	1	2	1
22	335	3	5	2009	2	1	0	0	0	0	0	2	0	0	0	3	2	2	2	1	1	2	1
23	336	3	5	2009	2	2	0	0	0	0	0	0	0	0	0	2	1	1	2	1	0	0	1
24	337	3	5	2009	2	0	0	0	0	0	1	0	0	0	0	1	1	1	2	1	0	0	1
25	338	3	5	2009	2	3	0	0	0	0	0	0	0	0	0	3	1	1	2	1	0	0	1
26	339	3	5	2009	2	0	0	0	0	0	0	1	0	0	0	1	1	1	1	1	1	1	1
27	340	3	5	2009	2	1	0	0	0	0	0	1	0	0	0	2	2	2	1	1	1	1	1
28	341	3	5	2009	2	0	0	0	0	0	0	1	0	0	0	1	1	1	1	1	1	1	1
29	342	3	5	2009	2	1	0	0	0	0	0	1	0	0	0	2	2	2	1	1	1	1	1
30	343	3	5	2009	2	0	0	0	0	0	0	1	0	0	0	1	1	1	1	1	1	1	1
31	344	3	5	2009	2	1	0	0	0	0	0	1	0	0	0	2	2	2	1	1	1	1	1
32	345	3	5	2009	2	0	0	0	0	0	0	1	0	0	0	1	1	1	1	1	1	1	1
33	346	3	5	2009	2	1	0	0	0	0	0	0	0	0	0	1	1	1	1	1	0	0	1
34	347	3	5	2009	2	0	0	0	0	0	0	1	0	0	0	1	1	1	1	1	0	0	1
35	348	3	5	2009	2	1	0	0	0	0	1	0	0	0	0	2	2	2	1	1	0	0	1
36	349	3	5	2009	2	0	0	1	0	0	0	0	0	0	0	1	1	1	1	1	0	0	1
37	350	3	5	2009	2	1	0	0	0	0	0	0	0	0	0	1	1	1	1	1	0	0	1
38	351	3	5	2009	2	1	0	0	0	0	0	0	0	0	0	1	1	1	1	1	0	0	1
39	352	3	5	2009	2	1	0	0	0	0	1	0	0	0	0	2	2	2	1	1	0	0	1
40	353	3	5	2009	2	1	1	0	0	0	0	1	0	0	0	3	3	3	1	1	0	0	1
41	354	3	5	2009	2	3	0	0	0	0	0	0	0	0	0	3	1	1	1	1	0	0	1
42	355	3	5	2009	2	1	0	1	0	0	0	1	0	0	0	3	3	3	1	1	1	1	1
43	356	3	5	2009	2	0	0	0	0	0	0	3	0	0	0	3	1	1	1	1	1	1	1
44	357	3	5	2009	2	1	0	0	0	0	1	0	0	0	0	2	2	2	1	1	0	0	1
45	358	3	5	2009	2	1	0	0	0	0	0	0	0	0	0	1	1	1	1	1	0	0	1
46	359	3	5	2009	2	4	0	0	0	0	0	1	0	0	0	5	2	2	1	1	1	1	1
47	360	3	5	2009	2	1	0	0	0	0	0	1	0	0	0	2	2	2	1	1	1	1	1
48	361	3	5	2009	2	0	1	0	0	0	0	1	0	0	0	2	2	2	1	1	1	1	1
49	362	3	5	2009	2	2	0	0	0	0	0	0	0	0	0	2	1	1	1	1	0	0	1
50	363	3	5	2009	2	1	0	0	0	0	0	0	0	0	0	1	1	1	1	1	0	0	1
51	364	3	5	2009	2	0	0	0	0	0	0	0	0	0	0	0	0		1	1	0	0	0
52	365	3	5	2009	2	0	0	0	0	0	0	0	0	0	0	0	0		1	1	0	0	0
53	366	3	5	2009	2	0	0	0	0	0	0	0	0	0	0	0	0		1	1	0	0	0
54	367	3	5	2009	2	0	0	0	0	0	0	0	0	0	0	0	0		1	1	0	0	0
55	368	3	5	2009	2	0	0	0	0	0	0	0	0	0	0	0	0		1	1	0	0	0
56	369	3	5	2009	2	0	0	0	0	0	0	0	0	0	0	0	0		1	1	0	0	0
57	370	3	5	2009	2	0	0	0	0	0	0	0	0	0	0	0	0		1	1	0	0	0
58	371	3	5	2009	2	0	0	0	0	0	0	0	0	0	0	0	0		1	1	0	0	0
59	372	3	5	2009	2	0	0	0	0	0	0	0	0	0	0	0	0		1	1	0	0	0
60	373	3	5	2009	2	0	0	0	0	0	0	0	0	0	0	0	0		1	1	0	0	0
61	374	3	5	2009	2	0	0	0	0	0	0	0	0	0	0	0	0		1	1	0	0	0
62	375	3	5	2009	2	0	0	0	0	0	0	0	0	0	0	0	0		1	1	0	0	0
63	376	3	5	2009	2	0	0	0	0	0	0	0	0	0	0	0	0		1	1	0	0	0
64	377	3	5	2009	2	0	0	0	0	0	0	0	0	0	0	0	0		1	1	0	0	0
65	378	3	5	2009	2	0	0	0	0	0	0	0	0	0	0	0	0		2	1	0	0	0
66	379	3	5	2009	2	0	0	0	0	0	0	0	0	0	0	0	0		2	1	0	0	0
67	380	3	5	2009	2	0	0	0	0	0	0	0	0	0	0	0	0		2	1	0	0	0
68	381	3	5	2009	2	0	0	0	0	0	0	0	0	0	0	0	0		2	1	0	0	0
1	382	3	9	2009	2	0	0	0	0	0	0	0	0	0	0	0	0		1	1	0	0	0
2	383	3	9	2009	2	0	0	0	0	0	0	0	0	0	0	0	0		2	1	0	0	0
1	384	3	11	2009	2	0	0	0	0	0	0	0	0	0	0	0	0		1	1	0	0	0
1	385	3	12	2009	2	0	0	0	0	0	0	0	0	0	0	0	0		1	1	0	0	0
2	386	3	12	2009	2	0	0	0	0	0	0	0	0	0	0	0	0		1	1	0	0	0
3	387	3	12	2009	2	0	0	0	0	0	0	0	0	0	0	0	0		1	1	0	0	0
4	388	3	12	2009	2	0	0	0	0	0	0	0	0	0	0	0	0		1	1	0	0	0
5	389	3	12	2009	2	0	0	0	0	0	0	0	0	0	0	0	0		1	1	0	0	0
6	390	3	12	2009	2	0	0	0	0	0	0	0	0	0	0	0	0		2	1	0	0	0
7	391	3	12	2009	2	0	0	0	0	0	0	0	0	0	0	0	0		2	1	0	0	0
8	392	3	12	2009	2	0	0	0	0	0	0	0	0	0	0	0	0		2	1	0	0	0
9	393	3	12	2009	2	0	0	0	0	0	0	0	0	0	0	0	0		2	1	0	0	0
10	394	3	12	2009	2	0	0	0	0	0	0	0	0	0	0	0	0		2	1	0	0	0
1	395	3	1	2010	2	0	0	0	0	0	0	0	0	0	0	0	0		2	1	0	0	0
2	396	3	1	2010	2	0	0	0	0	0	0	0	0	0	0	0	0		2	1	0	0	0
3	397	3	1	2010	2	0	0	0	0	0	0	0	0	0	0	0	0		1	1	0	0	0
4	398	3	1	2010	2	0	0	0	0	0	0	0	0	0	0	0	0		1	1	0	0	0
1	515	4	10	2008	2	0	0	0	0	0	0	0	0	0	0	0	0		2	1	0	0	0
2	516	4	10	2008	2	0	0	0	0	0	0	0	0	0	0	0	0		2	1	0	0	0
3	517	4	10	2008	2	0	0	0	0	0	0	0	0	0	0	0	0		2	1	0	0	0
4	518	4	10	2008	2	0	0	0	0	0	0	0	0	0	0	0	0		2	1	0	0	0
5	519	4	10	2008	2	0	0	0	0	0	0	0	0	0	0	0	0		2	1	0	0	0
6	520	4	10	2008	2	0	0	0	0	0	0	0	0	0	0	0	0		2	1	0	0	0
7	521	4	10	2008	2	0	0	0	0	0	0	0	0	0	0	0	0		2	1	0	0	0
8	522	4	10	2008	2	0	0	0	0	0	0	0	0	0	0	0	0		2	1	0	0	0
9	523	4	10	2008	2	0	0	0	0	0	0	0	0	0	0	0	0		2	1	0	0	0
10	524	4	10	2008	2	0	0	0	0	0	0	0	0	0	0	0	0		2	1	0	0	0

## Sheet: AF-JUV-SPSS
#	No	SITE	month	year	specie	FL	FF	WS	BG	FT	EA	AT	AM	GS	GSP	all/M	SR	SR inf	sex	stage	colour2	colour3	PRESENCE
1		1	6	2007	1	0	1	0	0	0	0	0	0	0	0	1	1	1	1	2	0	0	1
2		1	6	2007	1	0	1	0	0	0	2	0	0	0	0	3	2	2	1	2	0	0	1
3		1	6	2007	1	0	1	0	0	0	0	0	0	0	0	1	1	1	1	2	0	0	1
4		1	6	2007	1	0	1	0	0	0	0	0	0	0	0	1	1	1	1	2	0	0	1
5		1	6	2007	1	1	0	0	0	0	0	0	0	0	0	1	1	1	2	2	0	0	1
6		1	6	2007	1	0	1	0	0	0	0	0	0	0	0	1	1	1	2	2	0	0	1
7		1	6	2007	1	0	1	0	0	0	0	0	0	0	0	1	1	1	2	2	0	0	1
8		1	6	2007	1	0	1	0	0	0	0	0	0	0	0	1	1	1	2	2	0	0	1
9		1	6	2007	1	0	0	0	0	0	0	0	0	0	0	0	0		1	2	0	0	0
10		1	6	2007	1	0	0	0	0	0	0	0	0	0	0	0	0		1	2	0	0	0
11		1	6	2007	1	0	0	0	0	0	0	0	0	0	0	0	0		1	2	0	0	0
12		1	6	2007	1	0	0	0	0	0	0	0	0	0	0	0	0		1	2	0	0	0
13		1	6	2007	1	0	0	0	0	0	0	0	0	0	0	0	0		1	2	0	0	0
14		1	6	2007	1	0	0	0	0	0	0	0	0	0	0	0	0		1	2	0	0	0
15		1	6	2007	1	0	0	0	0	0	0	0	0	0	0	0	0		1	2	0	0	0
16		1	6	2007	1	0	0	0	0	0	0	0	0	0	0	0	0		1	2	0	0	0
17		1	6	2007	1	0	0	0	0	0	0	0	0	0	0	0	0		1	2	0	0	0
18		1	6	2007	1	0	0	0	0	0	0	0	0	0	0	0	0		1	2	0	0	0
19		1	6	2007	1	0	0	0	0	0	0	0	0	0	0	0	0		1	2	0	0	0
20		1	6	2007	1	0	0	0	0	0	0	0	0	0	0	0	0		1	2	0	0	0
21		1	6	2007	1	0	0	0	0	0	0	0	0	0	0	0	0		1	2	0	0	0
22		1	6	2007	1	0	0	0	0	0	0	0	0	0	0	0	0		1	2	0	0	0
23		1	6	2007	1	0	0	0	0	0	0	0	0	0	0	0	0		1	2	0	0	0
24		1	6	2007	1	0	0	0	0	0	0	0	0	0	0	0	0		1	2	0	0	0
25		1	6	2007	1	0	0	0	0	0	0	0	0	0	0	0	0		1	2	0	0	0
26		1	6	2007	1	0	0	0	0	0	0	0	0	0	0	0	0		1	2	0	0	0
27		1	6	2007	1	0	0	0	0	0	0	0	0	0	0	0	0		1	2	0	0	0
28		1	6	2007	1	0	0	0	0	0	0	0	0	0	0	0	0		1	2	0	0	0
29		1	6	2007	1	0	0	0	0	0	0	0	0	0	0	0	0		1	2	0	0	0
30		1	6	2007	1	0	0	0	0	0	0	0	0	0	0	0	0		1	2	0	0	0
31		1	6	2007	1	0	0	0	0	0	0	0	0	0	0	0	0		1	2	0	0	0
32		1	6	2007	1	0	0	0	0	0	0	0	0	0	0	0	0		1	2	0	0	0
33		1	6	2007	1	0	0	0	0	0	0	0	0	0	0	0	0		1	2	0	0	0
34		1	6	2007	1	0	0	0	0	0	0	0	0	0	0	0	0		1	2	0	0	0
35		1	6	2007	1	0	0	0	0	0	0	0	0	0	0	0	0		1	2	0	0	0
36		1	6	2007	1	0	0	0	0	0	0	0	0	0	0	0	0		1	2	0	0	0
37		1	6	2007	1	0	0	0	0	0	0	0	0	0	0	0	0		1	2	0	0	0
38		1	6	2007	1	0	0	0	0	0	0	0	0	0	0	0	0		1	2	0	0	0
39		1	6	2007	1	0	0	0	0	0	0	0	0	0	0	0	0		1	2	0	0	0
40		1	6	2007	1	0	0	0	0	0	0	0	0	0	0	0	0		1	2	0	0	0
41		1	6	2007	1	0	0	0	0	0	0	0	0	0	0	0	0		1	2	0	0	0
42		1	6	2007	1	0	0	0	0	0	0	0	0	0	0	0	0		1	2	0	0	0
43		1	6	2007	1	0	0	0	0	0	0	0	0	0	0	0	0		1	2	0	0	0
44		1	6	2007	1	0	0	0	0	0	0	0	0	0	0	0	0		1	2	0	0	0
45		1	6	2007	1	0	0	0	0	0	0	0	0	0	0	0	0		1	2	0	0	0
46		1	6	2007	1	0	0	0	0	0	0	0	0	0	0	0	0		1	2	0	0	0
47		1	6	2007	1	0	0	0	0	0	0	0	0	0	0	0	0		1	2	0	0	0
48		1	6	2007	1	0	0	0	0	0	0	0	0	0	0	0	0		1	2	0	0	0
49		1	6	2007	1	0	0	0	0	0	0	0	0	0	0	0	0		1	2	0	0	0
50		1	6	2007	1	0	0	0	0	0	0	0	0	0	0	0	0		1	2	0	0	0
51		1	6	2007	1	0	0	0	0	0	0	0	0	0	0	0	0		1	2	0	0	0
52		1	6	2007	1	0	0	0	0	0	0	0	0	0	0	0	0		1	2	0	0	0
53		1	6	2007	1	0	0	0	0	0	0	0	0	0	0	0	0		1	2	0	0	0
54		1	6	2007	1	0	0	0	0	0	0	0	0	0	0	0	0		1	2	0	0	0
55		1	6	2007	1	0	0	0	0	0	0	0	0	0	0	0	0		1	2	0	0	0
56		1	6	2007	1	0	0	0	0	0	0	0	0	0	0	0	0		1	2	0	0	0
57		1	6	2007	1	0	0	0	0	0	0	0	0	0	0	0	0		1	2	0	0	0
58		1	6	2007	1	0	0	0	0	0	0	0	0	0	0	0	0		1	2	0	0	0
59		1	6	2007	1	0	0	0	0	0	0	0	0	0	0	0	0		1	2	0	0	0
60		1	6	2007	1	0	0	0	0	0	0	0	0	0	0	0	0		1	2	0	0	0
61		1	6	2007	1	0	0	0	0	0	0	0	0	0	0	0	0		1	2	0	0	0
62		1	6	2007	1	0	0	0	0	0	0	0	0	0	0	0	0		1	2	0	0	0
63		1	6	2007	1	0	0	0	0	0	0	0	0	0	0	0	0		1	2	0	0	0
64		1	6	2007	1	0	0	0	0	0	0	0	0	0	0	0	0		1	2	0	0	0
65		1	6	2007	1	0	0	0	0	0	0	0	0	0	0	0	0		1	2	0	0	0
66		1	6	2007	1	0	0	0	0	0	0	0	0	0	0	0	0		1	2	0	0	0
67		1	6	2007	1	0	0	0	0	0	0	0	0	0	0	0	0		1	2	0	0	0
68		1	6	2007	1	0	0	0	0	0	0	0	0	0	0	0	0		1	2	0	0	0
69		1	6	2007	1	0	0	0	0	0	0	0	0	0	0	0	0		1	2	0	0	0
70		1	6	2007	1	0	0	0	0	0	0	0	0	0	0	0	0		1	2	0	0	0
71		1	6	2007	1	0	0	0	0	0	0	0	0	0	0	0	0		1	2	0	0	0
72		1	6	2007	1	0	0	0	0	0	0	0	0	0	0	0	0		1	2	0	0	0
73		1	6	2007	1	0	0	0	0	0	0	0	0	0	0	0	0		1	2	0	0	0
74		1	6	2007	1	0	0	0	0	0	0	0	0	0	0	0	0		1	2	0	0	0
75		1	6	2007	1	0	0	0	0	0	0	0	0	0	0	0	0		1	2	0	0	0
76		1	6	2007	1	0	0	0	0	0	0	0	0	0	0	0	0		1	2	0	0	0
77		1	6	2007	1	0	0	0	0	0	0	0	0	0	0	0	0		1	2	0	0	0
78		1	6	2007	1	0	0	0	0	0	0	0	0	0	0	0	0		1	2	0	0	0
79		1	6	2007	1	0	0	0	0	0	0	0	0	0	0	0	0		1	2	0	0	0
80		1	6	2007	1	0	0	0	0	0	0	0	0	0	0	0	0		1	2	0	0	0
81		1	6	2007	1	0	0	0	0	0	0	0	0	0	0	0	0		1	2	0	0	0
82		1	6	2007	1	0	0	0	0	0	0	0	0	0	0	0	0		1	2	0	0	0
83		1	6	2007	1	0	0	0	0	0	0	0	0	0	0	0	0		1	2	0	0	0
84		1	6	2007	1	0	0	0	0	0	0	0	0	0	0	0	0		1	2	0	0	0
85		1	6	2007	1	0	0	0	0	0	0	0	0	0	0	0	0		1	2	0	0	0
86		1	6	2007	1	0	0	0	0	0	0	0	0	0	0	0	0		1	2	0	0	0
87		1	6	2007	1	0	0	0	0	0	0	0	0	0	0	0	0		1	2	0	0	0
88		1	6	2007	1	0	0	0	0	0	0	0	0	0	0	0	0		1	2	0	0	0
89		1	6	2007	1	0	0	0	0	0	0	0	0	0	0	0	0		1	2	0	0	0
90		1	6	2007	1	0	0	0	0	0	0	0	0	0	0	0	0		1	2	0	0	0
91		1	6	2007	1	0	0	0	0	0	0	0	0	0	0	0	0		1	2	0	0	0
92		1	6	2007	1	0	0	0	0	0	0	0	0	0	0	0	0		1	2	0	0	0
93		1	6	2007	1	0	0	0	0	0	0	0	0	0	0	0	0		1	2	0	0	0
94		1	6	2007	1	0	0	0	0	0	0	0	0	0	0	0	0		1	2	0	0	0
95		1	6	2007	1	0	0	0	0	0	0	0	0	0	0	0	0		1	2	0	0	0
96		1	6	2007	1	0	0	0	0	0	0	0	0	0	0	0	0		1	2	0	0	0
97		1	6	2007	1	0	0	0	0	0	0	0	0	0	0	0	0		1	2	0	0	0
98		1	6	2007	1	0	0	0	0	0	0	0	0	0	0	0	0		1	2	0	0	0
99		1	6	2007	1	0	0	0	0	0	0	0	0	0	0	0	0		1	2	0	0	0
100		1	6	2007	1	0	0	0	0	0	0	0	0	0	0	0	0		1	2	0	0	0
101		1	6	2007	1	0	0	0	0	0	0	0	0	0	0	0	0		1	2	0	0	0
102		1	6	2007	1	0	0	0	0	0	0	0	0	0	0	0	0		1	2	0	0	0
103		1	6	2007	1	0	0	0	0	0	0	0	0	0	0	0	0		1	2	0	0	0
104		1	6	2007	1	0	0	0	0	0	0	0	0	0	0	0	0		1	2	0	0	0
105		1	6	2007	1	0	0	0	0	0	0	0	0	0	0	0	0		1	2	0	0	0
106		1	6	2007	1	0	0	0	0	0	0	0	0	0	0	0	0		1	2	0	0	0
107		1	6	2007	1	0	0	0	0	0	0	0	0	0	0	0	0		2	2	0	0	0
108		1	6	2007	1	0	0	0	0	0	0	0	0	0	0	0	0		2	2	0	0	0
109		1	6	2007	1	0	0	0	0	0	0	0	0	0	0	0	0		2	2	0	0	0
110		1	6	2007	1	0	0	0	0	0	0	0	0	0	0	0	0		2	2	0	0	0
111		1	6	2007	1	0	0	0	0	0	0	0	0	0	0	0	0		2	2	0	0	0
112		1	6	2007	1	0	0	0	0	0	0	0	0	0	0	0	0		2	2	0	0	0
113		1	6	2007	1	0	0	0	0	0	0	0	0	0	0	0	0		2	2	0	0	0
114		1	6	2007	1	0	0	0	0	0	0	0	0	0	0	0	0		2	2	0	0	0
115		1	6	2007	1	0	0	0	0	0	0	0	0	0	0	0	0		2	2	0	0	0
116		1	6	2007	1	0	0	0	0	0	0	0	0	0	0	0	0		2	2	0	0	0
117		1	6	2007	1	0	0	0	0	0	0	0	0	0	0	0	0		2	2	0	0	0
118		1	6	2007	1	0	0	0	0	0	0	0	0	0	0	0	0		2	2	0	0	0
119		1	6	2007	1	0	0	0	0	0	0	0	0	0	0	0	0		2	2	0	0	0
120		1	6	2007	1	0	0	0	0	0	0	0	0	0	0	0	0		2	2	0	0	0
121		1	6	2007	1	0	0	0	0	0	0	0	0	0	0	0	0		2	2	0	0	0
122		1	6	2007	1	0	0	0	0	0	0	0	0	0	0	0	0		2	2	0	0	0
123		1	6	2007	1	0	0	0	0	0	0	0	0	0	0	0	0		2	2	0	0	0
124		1	6	2007	1	0	0	0	0	0	0	0	0	0	0	0	0		2	2	0	0	0
125		1	6	2007	1	0	0	0	0	0	0	0	0	0	0	0	0		2	2	0	0	0
126		1	6	2007	1	0	0	0	0	0	0	0	0	0	0	0	0		2	2	0	0	0
127		1	6	2007	1	0	0	0	0	0	0	0	0	0	0	0	0		2	2	0	0	0
128		1	6	2007	1	0	0	0	0	0	0	0	0	0	0	0	0		2	2	0	0	0
129		1	6	2007	1	0	0	0	0	0	0	0	0	0	0	0	0		2	2	0	0	0
130		1	6	2007	1	0	0	0	0	0	0	0	0	0	0	0	0		2	2	0	0	0
131		1	6	2007	1	0	0	0	0	0	0	0	0	0	0	0	0		2	2	0	0	0
132		1	6	2007	1	0	0	0	0	0	0	0	0	0	0	0	0		2	2	0	0	0
133		1	6	2007	1	0	0	0	0	0	0	0	0	0	0	0	0		2	2	0	0	0
134		1	6	2007	1	0	0	0	0	0	0	0	0	0	0	0	0		2	2	0	0	0
135		1	6	2007	1	0	0	0	0	0	0	0	0	0	0	0	0		2	2	0	0	0
136		1	6	2007	1	0	0	0	0	0	0	0	0	0	0	0	0		2	2	0	0	0
137		1	6	2007	1	0	0	0	0	0	0	0	0	0	0	0	0		2	2	0	0	0
138		1	6	2007	1	0	0	0	0	0	0	0	0	0	0	0	0		2	2	0	0	0
139		1	6	2007	1	0	0	0	0	0	0	0	0	0	0	0	0		2	2	0	0	0
140		1	6	2007	1	0	0	0	0	0	0	0	0	0	0	0	0		2	2	0	0	0
141		1	6	2007	1	0	0	0	0	0	0	0	0	0	0	0	0		2	2	0	0	0
142		1	6	2007	1	0	0	0	0	0	0	0	0	0	0	0	0		2	2	0	0	0
143		1	6	2007	1	0	0	0	0	0	0	0	0	0	0	0	0		2	2	0	0	0
144		1	6	2007	1	0	0	0	0	0	0	0	0	0	0	0	0		2	2	0	0	0
145		1	6	2007	1	0	0	0	0	0	0	0	0	0	0	0	0		2	2	0	0	0
146		1	6	2007	1	0	0	0	0	0	0	0	0	0	0	0	0		2	2	0	0	0
147		1	6	2007	1	0	0	0	0	0	0	0	0	0	0	0	0		2	2	0	0	0
148		1	6	2007	1	0	0	0	0	0	0	0	0	0	0	0	0		2	2	0	0	0
149		1	6	2007	1	0	0	0	0	0	0	0	0	0	0	0	0		2	2	0	0	0
150		1	6	2007	1	0	0	0	0	0	0	0	0	0	0	0	0		2	2	0	0	0
151		1	6	2007	1	0	0	0	0	0	0	0	0	0	0	0	0		2	2	0	0	0
152		1	6	2007	1	0	0	0	0	0	0	0	0	0	0	0	0		2	2	0	0	0
153		1	6	2007	1	0	0	0	0	0	0	0	0	0	0	0	0		2	2	0	0	0
154		1	6	2007	1	0	0	0	0	0	0	0	0	0	0	0	0		2	2	0	0	0
155		1	6	2007	1	0	0	0	0	0	0	0	0	0	0	0	0		2	2	0	0	0
156		1	6	2007	1	0	0	0	0	0	0	0	0	0	0	0	0		2	2	0	0	0
157		1	6	2007	1	0	0	0	0	0	0	0	0	0	0	0	0		2	2	0	0	0
158		1	6	2007	1	0	0	0	0	0	0	0	0	0	0	0	0		2	2	0	0	0
159		1	6	2007	1	0	0	0	0	0	0	0	0	0	0	0	0		2	2	0	0	0
160		1	6	2007	1	0	0	0	0	0	0	0	0	0	0	0	0		2	2	0	0	0
161		1	6	2007	1	0	0	0	0	0	0	0	0	0	0	0	0		2	2	0	0	0
162		1	6	2007	1	0	0	0	0	0	0	0	0	0	0	0	0		2	2	0	0	0
163		1	6	2007	1	0	0	0	0	0	0	0	0	0	0	0	0		2	2	0	0	0
164		1	6	2007	1	0	0	0	0	0	0	0	0	0	0	0	0		2	2	0	0	0
165		1	6	2007	1	0	0	0	0	0	0	0	0	0	0	0	0		2	2	0	0	0
166		1	6	2007	1	0	0	0	0	0	0	0	0	0	0	0	0		2	2	0	0	0
167		1	6	2007	1	0	0	0	0	0	0	0	0	0	0	0	0		2	2	0	0	0
168		1	6	2007	1	0	0	0	0	0	0	0	0	0	0	0	0		2	2	0	0	0
169		1	6	2007	1	0	0	0	0	0	0	0	0	0	0	0	0		2	2	0	0	0
170		1	6	2007	1	0	0	0	0	0	0	0	0	0	0	0	0		2	2	0	0	0
171		1	6	2007	1	0	0	0	0	0	0	0	0	0	0	0	0		2	2	0	0	0
172		1	6	2007	1	0	0	0	0	0	0	0	0	0	0	0	0		2	2	0	0	0
173		1	6	2007	1	0	0	0	0	0	0	0	0	0	0	0	0		2	2	0	0	0
174		1	6	2007	1	0	0	0	0	0	0	0	0	0	0	0	0		2	2	0	0	0
175		1	6	2007	1	0	0	0	0	0	0	0	0	0	0	0	0		2	2	0	0	0
176		1	6	2007	1	0	0	0	0	0	0	0	0	0	0	0	0		2	2	0	0	0
177		1	6	2007	1	0	0	0	0	0	0	0	0	0	0	0	0		2	2	0	0	0
178		1	6	2007	1	0	0	0	0	0	0	0	0	0	0	0	0		2	2	0	0	0
179		1	6	2007	1	0	0	0	0	0	0	0	0	0	0	0	0		2	2	0	0	0
180		1	6	2007	1	0	0	0	0	0	0	0	0	0	0	0	0		2	2	0	0	0
181		1	6	2007	1	0	0	0	0	0	0	0	0	0	0	0	0		2	2	0	0	0
182		1	6	2007	1	0	0	0	0	0	0	0	0	0	0	0	0		2	2	0	0	0
183		1	6	2007	1	0	0	0	0	0	0	0	0	0	0	0	0		2	2	0	0	0
184		1	6	2007	1	0	0	0	0	0	0	0	0	0	0	0	0		2	2	0	0	0
185		1	6	2007	1	0	0	0	0	0	0	0	0	0	0	0	0		2	2	0	0	0
186		1	6	2007	1	0	0	0	0	0	0	0	0	0	0	0	0		2	2	0	0	0
187		1	6	2007	1	0	0	0	0	0	0	0	0	0	0	0	0		2	2	0	0	0
188		1	6	2007	1	0	0	0	0	0	0	0	0	0	0	0	0		2	2	0	0	0
189		1	6	2007	1	0	0	0	0	0	0	0	0	0	0	0	0		2	2	0	0	0
190		1	6	2007	1	0	0	0	0	0	0	0	0	0	0	0	0		2	2	0	0	0
191		1	7	2007	1	0	0	0	0	0	0	0	0	1	0	1	1	1	1	2	0	0	1
192		1	7	2007	1	0	0	0	0	0	1	0	0	1	0	2	2	2	2	2	0	0	1
193		1	7	2007	1	0	1	0	0	0	0	0	0	0	0	1	1	1	2	2	0	0	1
194		1	7	2007	1	0	1	0	0	0	0	0	0	0	0	1	1	1	2	2	0	0	1
195		1	7	2007	1	0	0	0	0	0	3	0	0	1	0	4	2	2	2	2	1	2	1
196		1	7	2007	1	0	1	0	0	0	0	0	0	0	0	1	1	1	2	2	0	0	1
197		1	7	2007	1	0	0	0	0	0	0	0	0	0	0	0	0		1	2	0	0	0
198		1	7	2007	1	0	0	0	0	0	0	0	0	0	0	0	0		1	2	0	0	0
199		1	7	2007	1	0	0	0	0	0	0	0	0	0	0	0	0		1	2	0	0	0
200		1	7	2007	1	0	0	0	0	0	0	0	0	0	0	0	0		2	2	0	0	0
201		1	7	2007	1	0	0	0	0	0	0	0	0	0	0	0	0		1	2	0	0	0
202		1	7	2007	1	0	0	0	0	0	0	0	0	0	0	0	0		2	2	0	0	0
203		1	7	2007	1	0	0	0	0	0	0	0	0	0	0	0	0		2	2	0	0	0
204		1	7	2007	1	0	0	0	0	0	0	0	0	0	0	0	0		2	2	0	0	0
205		1	7	2007	1	0	0	0	0	0	0	0	0	0	0	0	0		1	2	0	0	0
206		1	7	2007	1	0	0	0	0	0	0	0	0	0	0	0	0		1	2	0	0	0
207		1	7	2007	1	0	0	0	0	0	0	0	0	0	0	0	0		1	2	0	0	0
208		1	7	2007	1	0	0	0	0	0	0	0	0	0	0	0	0		1	2	0	0	0
209		1	9	2007	1	0	1	0	0	0	0	0	0	0	0	1	1	1	1	2	0	0	1
210		1	9	2007	1	0	1	0	0	0	0	0	0	0	0	1	1	1	1	2	0	0	1
211		1	9	2007	1	0	1	0	0	0	0	0	0	0	0	1	1	1	2	2	0	0	1
212		1	9	2007	1	0	0	0	0	0	0	0	0	0	0	0	0		1	2	0	0	0
213		1	9	2007	1	0	0	0	0	0	0	0	0	0	0	0	0		1	2	0	0	0
214		1	9	2007	1	0	0	0	0	0	0	0	0	0	0	0	0		1	2	0	0	0
215		1	9	2007	1	0	0	0	0	0	0	0	0	0	0	0	0		1	2	0	0	0
216		1	9	2007	1	0	0	0	0	0	0	0	0	0	0	0	0		1	2	0	0	0
217		1	9	2007	1	0	0	0	0	0	0	0	0	0	0	0	0		1	2	0	0	0
218		1	9	2007	1	0	0	0	0	0	0	0	0	0	0	0	0		1	2	0	0	0
219		1	9	2007	1	0	0	0	0	0	0	0	0	0	0	0	0		1	2	0	0	0
220		1	9	2007	1	0	0	0	0	0	0	0	0	0	0	0	0		1	2	0	0	0
221		1	9	2007	1	0	0	0	0	0	0	0	0	0	0	0	0		1	2	0	0	0
222		1	9	2007	1	0	0	0	0	0	0	0	0	0	0	0	0		1	2	0	0	0
223		1	9	2007	1	0	0	0	0	0	0	0	0	0	0	0	0		1	2	0	0	0
224		1	9	2007	1	0	0	0	0	0	0	0	0	0	0	0	0		1	2	0	0	0
225		1	9	2007	1	0	0	0	0	0	0	0	0	0	0	0	0		1	2	0	0	0
226		1	9	2007	1	0	0	0	0	0	0	0	0	0	0	0	0		1	2	0	0	0
227		1	9	2007	1	0	0	0	0	0	0	0	0	0	0	0	0		1	2	0	0	0
228		1	9	2007	1	0	0	0	0	0	0	0	0	0	0	0	0		2	2	0	0	0
229		1	9	2007	1	0	0	0	0	0	0	0	0	0	0	0	0		2	2	0	0	0
230		1	9	2007	1	0	0	0	0	0	0	0	0	0	0	0	0		2	2	0	0	0
231		1	9	2007	1	0	0	0	0	0	0	0	0	0	0	0	0		2	2	0	0	0
232		1	9	2007	1	0	0	0	0	0	0	0	0	0	0	0	0		2	2	0	0	0
233		1	9	2007	1	0	0	0	0	0	0	0	0	0	0	0	0		2	2	0	0	0
234		1	9	2007	1	0	0	0	0	0	0	0	0	0	0	0	0		2	2	0	0	0
235		1	9	2007	1	0	0	0	0	0	0	0	0	0	0	0	0		2	2	0	0	0
236		1	9	2007	1	0	0	0	0	0	0	0	0	0	0	0	0		2	2	0	0	0
237		1	9	2007	1	0	0	0	0	0	0	0	0	0	0	0	0		2	2	0	0	0
238		1	9	2007	1	0	0	0	0	0	0	0	0	0	0	0	0		2	2	0	0	0
239		1	9	2007	1	0	0	0	0	0	0	0	0	0	0	0	0		2	2	0	0	0
240		1	9	2007	1	0	0	0	0	0	0	0	0	0	0	0	0		2	2	0	0	0
241		1	9	2007	1	0	0	0	0	0	0	0	0	0	0	0	0		2	2	0	0	0
242		1	11	2007	1	0	2	0	0	0	0	0	0	0	0	2	1	1	2	2	0	0	1
243		1	11	2007	1	0	0	0	0	0	0	0	0	0	0	0	0		1	2	0	0	0
244		1	11	2007	1	0	0	0	0	0	0	0	0	0	0	0	0		1	2	0	0	0
245		1	11	2007	1	0	0	0	0	0	0	0	0	0	0	0	0		1	2	0	0	0
246		1	11	2007	1	0	0	0	0	0	0	0	0	0	0	0	0		1	2	0	0	0
247		1	11	2007	1	0	0	0	0	0	0	0	0	0	0	0	0		1	2	0	0	0
248		1	11	2007	1	0	0	0	0	0	0	0	0	0	0	0	0		1	2	0	0	0
249		1	11	2007	1	0	0	0	0	0	0	0	0	0	0	0	0		1	2	0	0	0
250		1	11	2007	1	0	0	0	0	0	0	0	0	0	0	0	0		1	2	0	0	0
251		1	11	2007	1	0	0	0	0	0	0	0	0	0	0	0	0		1	2	0	0	0
252		1	11	2007	1	0	0	0	0	0	0	0	0	0	0	0	0		1	2	0	0	0
253		1	11	2007	1	0	0	0	0	0	0	0	0	0	0	0	0		1	2	0	0	0
254		1	11	2007	1	0	0	0	0	0	0	0	0	0	0	0	0		1	2	0	0	0
255		1	11	2007	1	0	0	0	0	0	0	0	0	0	0	0	0		1	2	0	0	0
256		1	11	2007	1	0	0	0	0	0	0	0	0	0	0	0	0		1	2	0	0	0
257		1	11	2007	1	0	0	0	0	0	0	0	0	0	0	0	0		1	2	0	0	0
258		1	11	2007	1	0	0	0	0	0	0	0	0	0	0	0	0		1	2	0	0	0
259		1	11	2007	1	0	0	0	0	0	0	0	0	0	0	0	0		1	2	0	0	0
260		1	11	2007	1	0	0	0	0	0	0	0	0	0	0	0	0		1	2	0	0	0
261		1	11	2007	1	0	0	0	0	0	0	0	0	0	0	0	0		1	2	0	0	0
262		1	11	2007	1	0	0	0	0	0	0	0	0	0	0	0	0		1	2	0	0	0
263		1	11	2007	1	0	0	0	0	0	0	0	0	0	0	0	0		1	2	0	0	0
264		1	11	2007	1	0	0	0	0	0	0	0	0	0	0	0	0		1	2	0	0	0
265		1	11	2007	1	0	0	0	0	0	0	0	0	0	0	0	0		1	2	0	0	0
266		1	11	2007	1	0	0	0	0	0	0	0	0	0	0	0	0		1	2	0	0	0
267		1	11	2007	1	0	0	0	0	0	0	0	0	0	0	0	0		1	2	0	0	0
268		1	11	2007	1	0	0	0	0	0	0	0	0	0	0	0	0		1	2	0	0	0
269		1	11	2007	1	0	0	0	0	0	0	0	0	0	0	0	0		1	2	0	0	0
270		1	11	2007	1	0	0	0	0	0	0	0	0	0	0	0	0		1	2	0	0	0
271		1	11	2007	1	0	0	0	0	0	0	0	0	0	0	0	0		1	2	0	0	0
272		1	11	2007	1	0	0	0	0	0	0	0	0	0	0	0	0		1	2	0	0	0
273		1	11	2007	1	0	0	0	0	0	0	0	0	0	0	0	0		1	2	0	0	0
274		1	11	2007	1	0	0	0	0	0	0	0	0	0	0	0	0		1	2	0	0	0
275		1	11	2007	1	0	0	0	0	0	0	0	0	0	0	0	0		1	2	0	0	0
276		1	11	2007	1	0	0	0	0	0	0	0	0	0	0	0	0		1	2	0	0	0
277		1	11	2007	1	0	0	0	0	0	0	0	0	0	0	0	0		1	2	0	0	0
278		1	11	2007	1	0	0	0	0	0	0	0	0	0	0	0	0		1	2	0	0	0
279		1	11	2007	1	0	0	0	0	0	0	0	0	0	0	0	0		1	2	0	0	0
280		1	11	2007	1	0	0	0	0	0	0	0	0	0	0	0	0		1	2	0	0	0
281		1	11	2007	1	0	0	0	0	0	0	0	0	0	0	0	0		1	2	0	0	0
282		1	11	2007	1	0	0	0	0	0	0	0	0	0	0	0	0		1	2	0	0	0
283		1	11	2007	1	0	0	0	0	0	0	0	0	0	0	0	0		1	2	0	0	0
284		1	11	2007	1	0	0	0	0	0	0	0	0	0	0	0	0		1	2	0	0	0
285		1	11	2007	1	0	0	0	0	0	0	0	0	0	0	0	0		1	2	0	0	0
286		1	11	2007	1	0	0	0	0	0	0	0	0	0	0	0	0		1	2	0	0	0
287		1	11	2007	1	0	0	0	0	0	0	0	0	0	0	0	0		1	2	0	0	0
288		1	11	2007	1	0	0	0	0	0	0	0	0	0	0	0	0		1	2	0	0	0
289		1	11	2007	1	0	0	0	0	0	0	0	0	0	0	0	0		1	2	0	0	0
290		1	11	2007	1	0	0	0	0	0	0	0	0	0	0	0	0		1	2	0	0	0
291		1	11	2007	1	0	0	0	0	0	0	0	0	0	0	0	0		1	2	0	0	0
292		1	11	2007	1	0	0	0	0	0	0	0	0	0	0	0	0		1	2	0	0	0
293		1	11	2007	1	0	0	0	0	0	0	0	0	0	0	0	0		1	2	0	0	0
294		1	11	2007	1	0	0	0	0	0	0	0	0	0	0	0	0		1	2	0	0	0
295		1	11	2007	1	0	0	0	0	0	0	0	0	0	0	0	0		1	2	0	0	0
296		1	11	2007	1	0	0	0	0	0	0	0	0	0	0	0	0		1	2	0	0	0
297		1	11	2007	1	0	0	0	0	0	0	0	0	0	0	0	0		1	2	0	0	0
298		1	11	2007	1	0	0	0	0	0	0	0	0	0	0	0	0		1	2	0	0	0
299		1	11	2007	1	0	0	0	0	0	0	0	0	0	0	0	0		1	2	0	0	0
300		1	11	2007	1	0	0	0	0	0	0	0	0	0	0	0	0		1	2	0	0	0
301		1	11	2007	1	0	0	0	0	0	0	0	0	0	0	0	0		1	2	0	0	0
302		1	11	2007	1	0	0	0	0	0	0	0	0	0	0	0	0		1	2	0	0	0
303		1	11	2007	1	0	0	0	0	0	0	0	0	0	0	0	0		1	2	0	0	0
304		1	11	2007	1	0	0	0	0	0	0	0	0	0	0	0	0		1	2	0	0	0
305		1	11	2007	1	0	0	0	0	0	0	0	0	0	0	0	0		1	2	0	0	0
306		1	11	2007	1	0	0	0	0	0	0	0	0	0	0	0	0		1	2	0	0	0
307		1	11	2007	1	0	0	0	0	0	0	0	0	0	0	0	0		1	2	0	0	0
308		1	11	2007	1	0	0	0	0	0	0	0	0	0	0	0	0		1	2	0	0	0
309		1	11	2007	1	0	0	0	0	0	0	0	0	0	0	0	0		1	2	0	0	0
310		1	11	2007	1	0	0	0	0	0	0	0	0	0	0	0	0		1	2	0	0	0
311		1	11	2007	1	0	0	0	0	0	0	0	0	0	0	0	0		1	2	0	0	0
312		1	11	2007	1	0	0	0	0	0	0	0	0	0	0	0	0		1	2	0	0	0
313		1	11	2007	1	0	0	0	0	0	0	0	0	0	0	0	0		1	2	0	0	0
314		1	11	2007	1	0	0	0	0	0	0	0	0	0	0	0	0		1	2	0	0	0
315		1	11	2007	1	0	0	0	0	0	0	0	0	0	0	0	0		1	2	0	0	0
316		1	11	2007	1	0	0	0	0	0	0	0	0	0	0	0	0		1	2	0	0	0
317		1	11	2007	1	0	0	0	0	0	0	0	0	0	0	0	0		1	2	0	0	0
318		1	11	2007	1	0	0	0	0	0	0	0	0	0	0	0	0		1	2	0	0	0
319		1	11	2007	1	0	0	0	0	0	0	0	0	0	0	0	0		1	2	0	0	0
320		1	11	2007	1	0	0	0	0	0	0	0	0	0	0	0	0		1	2	0	0	0
321		1	11	2007	1	0	0	0	0	0	0	0	0	0	0	0	0		1	2	0	0	0
322		1	11	2007	1	0	0	0	0	0	0	0	0	0	0	0	0		1	2	0	0	0
323		1	11	2007	1	0	0	0	0	0	0	0	0	0	0	0	0		1	2	0	0	0
324		1	11	2007	1	0	0	0	0	0	0	0	0	0	0	0	0		1	2	0	0	0
325		1	11	2007	1	0	0	0	0	0	0	0	0	0	0	0	0		1	2	0	0	0
326		1	11	2007	1	0	0	0	0	0	0	0	0	0	0	0	0		1	2	0	0	0
327		1	11	2007	1	0	0	0	0	0	0	0	0	0	0	0	0		1	2	0	0	0
328		1	11	2007	1	0	0	0	0	0	0	0	0	0	0	0	0		1	2	0	0	0
329		1	11	2007	1	0	0	0	0	0	0	0	0	0	0	0	0		1	2	0	0	0
330		1	11	2007	1	0	0	0	0	0	0	0	0	0	0	0	0		1	2	0	0	0
331		1	11	2007	1	0	0	0	0	0	0	0	0	0	0	0	0		1	2	0	0	0
332		1	11	2007	1	0	0	0	0	0	0	0	0	0	0	0	0		1	2	0	0	0
333		1	11	2007	1	0	0	0	0	0	0	0	0	0	0	0	0		1	2	0	0	0
334		1	11	2007	1	0	0	0	0	0	0	0	0	0	0	0	0		1	2	0	0	0
335		1	11	2007	1	0	0	0	0	0	0	0	0	0	0	0	0		1	2	0	0	0
336		1	11	2007	1	0	0	0	0	0	0	0	0	0	0	0	0		1	2	0	0	0
337		1	11	2007	1	0	0	0	0	0	0	0	0	0	0	0	0		1	2	0	0	0
338		1	11	2007	1	0	0	0	0	0	0	0	0	0	0	0	0		1	2	0	0	0
339		1	11	2007	1	0	0	0	0	0	0	0	0	0	0	0	0		1	2	0	0	0
340		1	11	2007	1	0	0	0	0	0	0	0	0	0	0	0	0		1	2	0	0	0
341		1	11	2007	1	0	0	0	0	0	0	0	0	0	0	0	0		1	2	0	0	0
342		1	11	2007	1	0	0	0	0	0	0	0	0	0	0	0	0		1	2	0	0	0
343		1	11	2007	1	0	0	0	0	0	0	0	0	0	0	0	0		1	2	0	0	0
344		1	11	2007	1	0	0	0	0	0	0	0	0	0	0	0	0		1	2	0	0	0
345		1	11	2007	1	0	0	0	0	0	0	0	0	0	0	0	0		1	2	0	0	0
346		1	11	2007	1	0	0	0	0	0	0	0	0	0	0	0	0		1	2	0	0	0
347		1	11	2007	1	0	0	0	0	0	0	0	0	0	0	0	0		1	2	0	0	0
348		1	11	2007	1	0	0	0	0	0	0	0	0	0	0	0	0		1	2	0	0	0
349		1	11	2007	1	0	0	0	0	0	0	0	0	0	0	0	0		1	2	0	0	0
350		1	11	2007	1	0	0	0	0	0	0	0	0	0	0	0	0		1	2	0	0	0
351		1	11	2007	1	0	0	0	0	0	0	0	0	0	0	0	0		1	2	0	0	0
352		1	11	2007	1	0	0	0	0	0	0	0	0	0	0	0	0		1	2	0	0	0
353		1	11	2007	1	0	0	0	0	0	0	0	0	0	0	0	0		1	2	0	0	0
354		1	11	2007	1	0	0	0	0	0	0	0	0	0	0	0	0		1	2	0	0	0
355		1	11	2007	1	0	0	0	0	0	0	0	0	0	0	0	0		1	2	0	0	0
356		1	11	2007	1	0	0	0	0	0	0	0	0	0	0	0	0		1	2	0	0	0
357		1	11	2007	1	0	0	0	0	0	0	0	0	0	0	0	0		1	2	0	0	0
358		1	11	2007	1	0	0	0	0	0	0	0	0	0	0	0	0		1	2	0	0	0
359		1	11	2007	1	0	0	0	0	0	0	0	0	0	0	0	0		1	2	0	0	0
360		1	11	2007	1	0	0	0	0	0	0	0	0	0	0	0	0		1	2	0	0	0
361		1	11	2007	1	0	0	0	0	0	0	0	0	0	0	0	0		1	2	0	0	0
362		1	11	2007	1	0	0	0	0	0	0	0	0	0	0	0	0		1	2	0	0	0
363		1	11	2007	1	0	0	0	0	0	0	0	0	0	0	0	0		1	2	0	0	0
364		1	11	2007	1	0	0	0	0	0	0	0	0	0	0	0	0		1	2	0	0	0
365		1	11	2007	1	0	0	0	0	0	0	0	0	0	0	0	0		1	2	0	0	0
366		1	11	2007	1	0	0	0	0	0	0	0	0	0	0	0	0		1	2	0	0	0
367		1	11	2007	1	0	0	0	0	0	0	0	0	0	0	0	0		1	2	0	0	0
368		1	11	2007	1	0	0	0	0	0	0	0	0	0	0	0	0		1	2	0	0	0
369		1	11	2007	1	0	0	0	0	0	0	0	0	0	0	0	0		1	2	0	0	0
370		1	11	2007	1	0	0	0	0	0	0	0	0	0	0	0	0		1	2	0	0	0
371		1	11	2007	1	0	0	0	0	0	0	0	0	0	0	0	0		1	2	0	0	0
372		1	11	2007	1	0	0	0	0	0	0	0	0	0	0	0	0		1	2	0	0	0
373		1	11	2007	1	0	0	0	0	0	0	0	0	0	0	0	0		1	2	0	0	0
374		1	11	2007	1	0	0	0	0	0	0	0	0	0	0	0	0		1	2	0	0	0
375		1	11	2007	1	0	0	0	0	0	0	0	0	0	0	0	0		1	2	0	0	0
376		1	11	2007	1	0	0	0	0	0	0	0	0	0	0	0	0		1	2	0	0	0
377		1	11	2007	1	0	0	0	0	0	0	0	0	0	0	0	0		1	2	0	0	0
378		1	11	2007	1	0	0	0	0	0	0	0	0	0	0	0	0		1	2	0	0	0
379		1	11	2007	1	0	0	0	0	0	0	0	0	0	0	0	0		1	2	0	0	0
380		1	11	2007	1	0	0	0	0	0	0	0	0	0	0	0	0		1	2	0	0	0
381		1	11	2007	1	0	0	0	0	0	0	0	0	0	0	0	0		1	2	0	0	0
382		1	11	2007	1	0	0	0	0	0	0	0	0	0	0	0	0		1	2	0	0	0
383		1	11	2007	1	0	0	0	0	0	0	0	0	0	0	0	0		1	2	0	0	0
384		1	11	2007	1	0	0	0	0	0	0	0	0	0	0	0	0		1	2	0	0	0
385		1	11	2007	1	0	0	0	0	0	0	0	0	0	0	0	0		1	2	0	0	0
386		1	11	2007	1	0	0	0	0	0	0	0	0	0	0	0	0		1	2	0	0	0
387		1	11	2007	1	0	0	0	0	0	0	0	0	0	0	0	0		1	2	0	0	0
388		1	11	2007	1	0	0	0	0	0	0	0	0	0	0	0	0		1	2	0	0	0
389		1	11	2007	1	0	0	0	0	0	0	0	0	0	0	0	0		1	2	0	0	0
390		1	11	2007	1	0	0	0	0	0	0	0	0	0	0	0	0		1	2	0	0	0
391		1	11	2007	1	0	0	0	0	0	0	0	0	0	0	0	0		1	2	0	0	0
392		1	11	2007	1	0	0	0	0	0	0	0	0	0	0	0	0		1	2	0	0	0
393		1	11	2007	1	0	0	0	0	0	0	0	0	0	0	0	0		1	2	0	0	0
394		1	11	2007	1	0	0	0	0	0	0	0	0	0	0	0	0		1	2	0	0	0
395		1	11	2007	1	0	0	0	0	0	0	0	0	0	0	0	0		1	2	0	0	0
396		1	11	2007	1	0	0	0	0	0	0	0	0	0	0	0	0		1	2	0	0	0
397		1	11	2007	1	0	0	0	0	0	0	0	0	0	0	0	0		1	2	0	0	0
398		1	11	2007	1	0	0	0	0	0	0	0	0	0	0	0	0		1	2	0	0	0
399		1	11	2007	1	0	0	0	0	0	0	0	0	0	0	0	0		1	2	0	0	0
400		1	11	2007	1	0	0	0	0	0	0	0	0	0	0	0	0		1	2	0	0	0
401		1	11	2007	1	0	0	0	0	0	0	0	0	0	0	0	0		1	2	0	0	0
402		1	11	2007	1	0	0	0	0	0	0	0	0	0	0	0	0		1	2	0	0	0
403		1	11	2007	1	0	0	0	0	0	0	0	0	0	0	0	0		1	2	0	0	0
404		1	11	2007	1	0	0	0	0	0	0	0	0	0	0	0	0		1	2	0	0	0
405		1	11	2007	1	0	0	0	0	0	0	0	0	0	0	0	0		1	2	0	0	0
406		1	11	2007	1	0	0	0	0	0	0	0	0	0	0	0	0		1	2	0	0	0
407		1	11	2007	1	0	0	0	0	0	0	0	0	0	0	0	0		1	2	0	0	0
408		1	11	2007	1	0	0	0	0	0	0	0	0	0	0	0	0		1	2	0	0	0
409		1	11	2007	1	0	0	0	0	0	0	0	0	0	0	0	0		1	2	0	0	0
410		1	11	2007	1	0	0	0	0	0	0	0	0	0	0	0	0		1	2	0	0	0
411		1	11	2007	1	0	0	0	0	0	0	0	0	0	0	0	0		1	2	0	0	0
412		1	11	2007	1	0	0	0	0	0	0	0	0	0	0	0	0		1	2	0	0	0
413		1	11	2007	1	0	0	0	0	0	0	0	0	0	0	0	0		1	2	0	0	0
414		1	11	2007	1	0	0	0	0	0	0	0	0	0	0	0	0		1	2	0	0	0
415		1	11	2007	1	0	0	0	0	0	0	0	0	0	0	0	0		1	2	0	0	0
416		1	11	2007	1	0	0	0	0	0	0	0	0	0	0	0	0		1	2	0	0	0
417		1	11	2007	1	0	0	0	0	0	0	0	0	0	0	0	0		1	2	0	0	0
418		1	11	2007	1	0	0	0	0	0	0	0	0	0	0	0	0		1	2	0	0	0
419		1	11	2007	1	0	0	0	0	0	0	0	0	0	0	0	0		1	2	0	0	0
420		1	11	2007	1	0	0	0	0	0	0	0	0	0	0	0	0		1	2	0	0	0
421		1	11	2007	1	0	0	0	0	0	0	0	0	0	0	0	0		1	2	0	0	0
422		1	11	2007	1	0	0	0	0	0	0	0	0	0	0	0	0		1	2	0	0	0
423		1	11	2007	1	0	0	0	0	0	0	0	0	0	0	0	0		1	2	0	0	0
424		1	11	2007	1	0	0	0	0	0	0	0	0	0	0	0	0		2	2	0	0	0
425		1	11	2007	1	0	0	0	0	0	0	0	0	0	0	0	0		2	2	0	0	0
426		1	11	2007	1	0	0	0	0	0	0	0	0	0	0	0	0		2	2	0	0	0
427		1	11	2007	1	0	0	0	0	0	0	0	0	0	0	0	0		2	2	0	0	0
428		1	11	2007	1	0	0	0	0	0	0	0	0	0	0	0	0		2	2	0	0	0
429		1	11	2007	1	0	0	0	0	0	0	0	0	0	0	0	0		2	2	0	0	0
430		1	11	2007	1	0	0	0	0	0	0	0	0	0	0	0	0		2	2	0	0	0
431		1	11	2007	1	0	0	0	0	0	0	0	0	0	0	0	0		2	2	0	0	0
432		1	11	2007	1	0	0	0	0	0	0	0	0	0	0	0	0		2	2	0	0	0
433		1	11	2007	1	0	0	0	0	0	0	0	0	0	0	0	0		2	2	0	0	0
434		1	11	2007	1	0	0	0	0	0	0	0	0	0	0	0	0		2	2	0	0	0
435		1	11	2007	1	0	0	0	0	0	0	0	0	0	0	0	0		2	2	0	0	0
436		1	11	2007	1	0	0	0	0	0	0	0	0	0	0	0	0		2	2	0	0	0
437		1	11	2007	1	0	0	0	0	0	0	0	0	0	0	0	0		2	2	0	0	0
438		1	11	2007	1	0	0	0	0	0	0	0	0	0	0	0	0		2	2	0	0	0
439		1	11	2007	1	0	0	0	0	0	0	0	0	0	0	0	0		2	2	0	0	0
440		1	11	2007	1	0	0	0	0	0	0	0	0	0	0	0	0		2	2	0	0	0
441		1	11	2007	1	0	0	0	0	0	0	0	0	0	0	0	0		2	2	0	0	0
442		1	11	2007	1	0	0	0	0	0	0	0	0	0	0	0	0		2	2	0	0	0
443		1	11	2007	1	0	0	0	0	0	0	0	0	0	0	0	0		2	2	0	0	0
444		1	11	2007	1	0	0	0	0	0	0	0	0	0	0	0	0		2	2	0	0	0
445		1	11	2007	1	0	0	0	0	0	0	0	0	0	0	0	0		2	2	0	0	0
446		1	11	2007	1	0	0	0	0	0	0	0	0	0	0	0	0		2	2	0	0	0
447		1	11	2007	1	0	0	0	0	0	0	0	0	0	0	0	0		2	2	0	0	0
448		1	11	2007	1	0	0	0	0	0	0	0	0	0	0	0	0		2	2	0	0	0
449		1	11	2007	1	0	0	0	0	0	0	0	0	0	0	0	0		2	2	0	0	0
450		1	11	2007	1	0	0	0	0	0	0	0	0	0	0	0	0		2	2	0	0	0
451		1	11	2007	1	0	0	0	0	0	0	0	0	0	0	0	0		2	2	0	0	0
452		1	11	2007	1	0	0	0	0	0	0	0	0	0	0	0	0		2	2	0	0	0
453		1	11	2007	1	0	0	0	0	0	0	0	0	0	0	0	0		2	2	0	0	0
454		1	11	2007	1	0	0	0	0	0	0	0	0	0	0	0	0		2	2	0	0	0
455		1	11	2007	1	0	0	0	0	0	0	0	0	0	0	0	0		2	2	0	0	0
456		1	11	2007	1	0	0	0	0	0	0	0	0	0	0	0	0		2	2	0	0	0
457		1	11	2007	1	0	0	0	0	0	0	0	0	0	0	0	0		2	2	0	0	0
458		1	11	2007	1	0	0	0	0	0	0	0	0	0	0	0	0		2	2	0	0	0
459		1	11	2007	1	0	0	0	0	0	0	0	0	0	0	0	0		2	2	0	0	0
460		1	11	2007	1	0	0	0	0	0	0	0	0	0	0	0	0		2	2	0	0	0
461		1	11	2007	1	0	0	0	0	0	0	0	0	0	0	0	0		2	2	0	0	0
462		1	11	2007	1	0	0	0	0	0	0	0	0	0	0	0	0		2	2	0	0	0
463		1	11	2007	1	0	0	0	0	0	0	0	0	0	0	0	0		2	2	0	0	0
464		1	11	2007	1	0	0	0	0	0	0	0	0	0	0	0	0		2	2	0	0	0
465		1	11	2007	1	0	0	0	0	0	0	0	0	0	0	0	0		2	2	0	0	0
466		1	11	2007	1	0	0	0	0	0	0	0	0	0	0	0	0		2	2	0	0	0
467		1	11	2007	1	0	0	0	0	0	0	0	0	0	0	0	0		2	2	0	0	0
468		1	11	2007	1	0	0	0	0	0	0	0	0	0	0	0	0		2	2	0	0	0
469		1	11	2007	1	0	0	0	0	0	0	0	0	0	0	0	0		2	2	0	0	0
470		1	11	2007	1	0	0	0	0	0	0	0	0	0	0	0	0		2	2	0	0	0
471		1	11	2007	1	0	0	0	0	0	0	0	0	0	0	0	0		2	2	0	0	0
472		1	11	2007	1	0	0	0	0	0	0	0	0	0	0	0	0		2	2	0	0	0
473		1	11	2007	1	0	0	0	0	0	0	0	0	0	0	0	0		2	2	0	0	0
474		1	11	2007	1	0	0	0	0	0	0	0	0	0	0	0	0		2	2	0	0	0
475		1	11	2007	1	0	0	0	0	0	0	0	0	0	0	0	0		2	2	0	0	0
476		1	11	2007	1	0	0	0	0	0	0	0	0	0	0	0	0		2	2	0	0	0
477		1	11	2007	1	0	0	0	0	0	0	0	0	0	0	0	0		2	2	0	0	0
478		1	11	2007	1	0	0	0	0	0	0	0	0	0	0	0	0		2	2	0	0	0
479		1	11	2007	1	0	0	0	0	0	0	0	0	0	0	0	0		2	2	0	0	0
480		1	11	2007	1	0	0	0	0	0	0	0	0	0	0	0	0		2	2	0	0	0
481		1	11	2007	1	0	0	0	0	0	0	0	0	0	0	0	0		2	2	0	0	0
482		1	11	2007	1	0	0	0	0	0	0	0	0	0	0	0	0		2	2	0	0	0
483		1	11	2007	1	0	0	0	0	0	0	0	0	0	0	0	0		2	2	0	0	0
484		1	11	2007	1	0	0	0	0	0	0	0	0	0	0	0	0		2	2	0	0	0
485		1	11	2007	1	0	0	0	0	0	0	0	0	0	0	0	0		2	2	0	0	0
486		1	11	2007	1	0	0	0	0	0	0	0	0	0	0	0	0		2	2	0	0	0
487		1	11	2007	1	0	0	0	0	0	0	0	0	0	0	0	0		2	2	0	0	0
488		1	11	2007	1	0	0	0	0	0	0	0	0	0	0	0	0		2	2	0	0	0
489		1	11	2007	1	0	0	0	0	0	0	0	0	0	0	0	0		2	2	0	0	0
490		1	11	2007	1	0	0	0	0	0	0	0	0	0	0	0	0		2	2	0	0	0
491		1	11	2007	1	0	0	0	0	0	0	0	0	0	0	0	0		2	2	0	0	0
492		1	11	2007	1	0	0	0	0	0	0	0	0	0	0	0	0		2	2	0	0	0
493		1	11	2007	1	0	0	0	0	0	0	0	0	0	0	0	0		2	2	0	0	0
494		1	11	2007	1	0	0	0	0	0	0	0	0	0	0	0	0		2	2	0	0	0
495		1	11	2007	1	0	0	0	0	0	0	0	0	0	0	0	0		2	2	0	0	0
496		1	11	2007	1	0	0	0	0	0	0	0	0	0	0	0	0		2	2	0	0	0
497		1	11	2007	1	0	0	0	0	0	0	0	0	0	0	0	0		2	2	0	0	0
498		1	11	2007	1	0	0	0	0	0	0	0	0	0	0	0	0		2	2	0	0	0
499		1	11	2007	1	0	0	0	0	0	0	0	0	0	0	0	0		2	2	0	0	0
500		1	11	2007	1	0	0	0	0	0	0	0	0	0	0	0	0		2	2	0	0	0
501		1	11	2007	1	0	0	0	0	0	0	0	0	0	0	0	0		2	2	0	0	0
502		1	11	2007	1	0	0	0	0	0	0	0	0	0	0	0	0		2	2	0	0	0
503		1	11	2007	1	0	0	0	0	0	0	0	0	0	0	0	0		2	2	0	0	0
504		1	11	2007	1	0	0	0	0	0	0	0	0	0	0	0	0		2	2	0	0	0
505		1	11	2007	1	0	0	0	0	0	0	0	0	0	0	0	0		2	2	0	0	0
506		1	11	2007	1	0	0	0	0	0	0	0	0	0	0	0	0		2	2	0	0	0
507		1	11	2007	1	0	0	0	0	0	0	0	0	0	0	0	0		2	2	0	0	0
508		1	11	2007	1	0	0	0	0	0	0	0	0	0	0	0	0		2	2	0	0	0
509		1	11	2007	1	0	0	0	0	0	0	0	0	0	0	0	0		2	2	0	0	0
510		1	11	2007	1	0	0	0	0	0	0	0	0	0	0	0	0		2	2	0	0	0
511		1	11	2007	1	0	0	0	0	0	0	0	0	0	0	0	0		2	2	0	0	0
512		1	11	2007	1	0	0	0	0	0	0	0	0	0	0	0	0		2	2	0	0	0
513		1	11	2007	1	0	0	0	0	0	0	0	0	0	0	0	0		2	2	0	0	0
514		1	11	2007	1	0	0	0	0	0	0	0	0	0	0	0	0		2	2	0	0	0
515		1	11	2007	1	0	0	0	0	0	0	0	0	0	0	0	0		2	2	0	0	0
516		1	11	2007	1	0	0	0	0	0	0	0	0	0	0	0	0		2	2	0	0	0
517		1	11	2007	1	0	0	0	0	0	0	0	0	0	0	0	0		2	2	0	0	0
518		1	11	2007	1	0	0	0	0	0	0	0	0	0	0	0	0		2	2	0	0	0
519		1	11	2007	1	0	0	0	0	0	0	0	0	0	0	0	0		2	2	0	0	0
520		1	11	2007	1	0	0	0	0	0	0	0	0	0	0	0	0		2	2	0	0	0
521		1	11	2007	1	0	0	0	0	0	0	0	0	0	0	0	0		2	2	0	0	0
522		1	11	2007	1	0	0	0	0	0	0	0	0	0	0	0	0		2	2	0	0	0
523		1	11	2007	1	0	0	0	0	0	0	0	0	0	0	0	0		2	2	0	0	0
524		1	11	2007	1	0	0	0	0	0	0	0	0	0	0	0	0		2	2	0	0	0
525		1	11	2007	1	0	0	0	0	0	0	0	0	0	0	0	0		2	2	0	0	0
526		1	11	2007	1	0	0	0	0	0	0	0	0	0	0	0	0		2	2	0	0	0
527		1	11	2007	1	0	0	0	0	0	0	0	0	0	0	0	0		2	2	0	0	0
528		1	11	2007	1	0	0	0	0	0	0	0	0	0	0	0	0		2	2	0	0	0
529		1	11	2007	1	0	0	0	0	0	0	0	0	0	0	0	0		2	2	0	0	0
530		1	11	2007	1	0	0	0	0	0	0	0	0	0	0	0	0		2	2	0	0	0
531		1	11	2007	1	0	0	0	0	0	0	0	0	0	0	0	0		2	2	0	0	0
532		1	11	2007	1	0	0	0	0	0	0	0	0	0	0	0	0		2	2	0	0	0
533		1	11	2007	1	0	0	0	0	0	0	0	0	0	0	0	0		2	2	0	0	0
534		1	11	2007	1	0	0	0	0	0	0	0	0	0	0	0	0		2	2	0	0	0
535		1	11	2007	1	0	0	0	0	0	0	0	0	0	0	0	0		2	2	0	0	0
536		1	11	2007	1	0	0	0	0	0	0	0	0	0	0	0	0		2	2	0	0	0
537		1	11	2007	1	0	0	0	0	0	0	0	0	0	0	0	0		2	2	0	0	0
538		1	11	2007	1	0	0	0	0	0	0	0	0	0	0	0	0		2	2	0	0	0
539		1	11	2007	1	0	0	0	0	0	0	0	0	0	0	0	0		2	2	0	0	0
540		1	11	2007	1	0	0	0	0	0	0	0	0	0	0	0	0		2	2	0	0	0
541		1	11	2007	1	0	0	0	0	0	0	0	0	0	0	0	0		2	2	0	0	0
542		1	11	2007	1	0	0	0	0	0	0	0	0	0	0	0	0		2	2	0	0	0
543		1	11	2007	1	0	0	0	0	0	0	0	0	0	0	0	0		2	2	0	0	0
544		1	11	2007	1	0	0	0	0	0	0	0	0	0	0	0	0		2	2	0	0	0
545		1	11	2007	1	0	0	0	0	0	0	0	0	0	0	0	0		2	2	0	0	0
546		1	11	2007	1	0	0	0	0	0	0	0	0	0	0	0	0		2	2	0	0	0
547		1	11	2007	1	0	0	0	0	0	0	0	0	0	0	0	0		2	2	0	0	0
548		1	11	2007	1	0	0	0	0	0	0	0	0	0	0	0	0		2	2	0	0	0
549		1	11	2007	1	0	0	0	0	0	0	0	0	0	0	0	0		2	2	0	0	0
550		1	11	2007	1	0	0	0	0	0	0	0	0	0	0	0	0		2	2	0	0	0
551		1	11	2007	1	0	0	0	0	0	0	0	0	0	0	0	0		2	2	0	0	0
552		1	11	2007	1	0	0	0	0	0	0	0	0	0	0	0	0		2	2	0	0	0
553		1	11	2007	1	0	0	0	0	0	0	0	0	0	0	0	0		2	2	0	0	0
554		1	11	2007	1	0	0	0	0	0	0	0	0	0	0	0	0		2	2	0	0	0
555		1	11	2007	1	0	0	0	0	0	0	0	0	0	0	0	0		2	2	0	0	0
556		1	11	2007	1	0	0	0	0	0	0	0	0	0	0	0	0		2	2	0	0	0
557		1	11	2007	1	0	0	0	0	0	0	0	0	0	0	0	0		2	2	0	0	0
558		1	11	2007	1	0	0	0	0	0	0	0	0	0	0	0	0		2	2	0	0	0
559		1	11	2007	1	0	0	0	0	0	0	0	0	0	0	0	0		2	2	0	0	0
560		1	11	2007	1	0	0	0	0	0	0	0	0	0	0	0	0		2	2	0	0	0
561		1	11	2007	1	0	0	0	0	0	0	0	0	0	0	0	0		2	2	0	0	0
562		1	11	2007	1	0	0	0	0	0	0	0	0	0	0	0	0		2	2	0	0	0
563		1	11	2007	1	0	0	0	0	0	0	0	0	0	0	0	0		2	2	0	0	0
564		1	11	2007	1	0	0	0	0	0	0	0	0	0	0	0	0		2	2	0	0	0
565		1	11	2007	1	0	0	0	0	0	0	0	0	0	0	0	0		2	2	0	0	0
566		1	11	2007	1	0	0	0	0	0	0	0	0	0	0	0	0		2	2	0	0	0
567		1	11	2007	1	0	0	0	0	0	0	0	0	0	0	0	0		2	2	0	0	0
568		1	11	2007	1	0	0	0	0	0	0	0	0	0	0	0	0		2	2	0	0	0
569		1	11	2007	1	0	0	0	0	0	0	0	0	0	0	0	0		2	2	0	0	0
570		1	11	2007	1	0	0	0	0	0	0	0	0	0	0	0	0		2	2	0	0	0
571		1	11	2007	1	0	0	0	0	0	0	0	0	0	0	0	0		2	2	0	0	0
572		1	11	2007	1	0	0	0	0	0	0	0	0	0	0	0	0		2	2	0	0	0
573		1	11	2007	1	0	0	0	0	0	0	0	0	0	0	0	0		2	2	0	0	0
574		1	11	2007	1	0	0	0	0	0	0	0	0	0	0	0	0		2	2	0	0	0
575		1	11	2007	1	0	0	0	0	0	0	0	0	0	0	0	0		2	2	0	0	0
576		1	11	2007	1	0	0	0	0	0	0	0	0	0	0	0	0		2	2	0	0	0
577		1	11	2007	1	0	0	0	0	0	0	0	0	0	0	0	0		2	2	0	0	0
578		1	11	2007	1	0	0	0	0	0	0	0	0	0	0	0	0		2	2	0	0	0
579		1	11	2007	1	0	0	0	0	0	0	0	0	0	0	0	0		2	2	0	0	0
580		1	11	2007	1	0	0	0	0	0	0	0	0	0	0	0	0		2	2	0	0	0
581		1	11	2007	1	0	0	0	0	0	0	0	0	0	0	0	0		2	2	0	0	0
582		1	11	2007	1	0	0	0	0	0	0	0	0	0	0	0	0		2	2	0	0	0
583		1	11	2007	1	0	0	0	0	0	0	0	0	0	0	0	0		2	2	0	0	0
584		1	11	2007	1	0	0	0	0	0	0	0	0	0	0	0	0		2	2	0	0	0
585		1	11	2007	1	0	0	0	0	0	0	0	0	0	0	0	0		2	2	0	0	0
586		1	11	2007	1	0	0	0	0	0	0	0	0	0	0	0	0		2	2	0	0	0
587		1	11	2007	1	0	0	0	0	0	0	0	0	0	0	0	0		2	2	0	0	0
588		1	11	2007	1	0	0	0	0	0	0	0	0	0	0	0	0		2	2	0	0	0
589		1	11	2007	1	0	0	0	0	0	0	0	0	0	0	0	0		2	2	0	0	0
590		1	11	2007	1	0	0	0	0	0	0	0	0	0	0	0	0		2	2	0	0	0
591		1	11	2007	1	0	0	0	0	0	0	0	0	0	0	0	0		2	2	0	0	0
592		1	11	2007	1	0	0	0	0	0	0	0	0	0	0	0	0		2	2	0	0	0
593		1	11	2007	1	0	0	0	0	0	0	0	0	0	0	0	0		2	2	0	0	0
594		1	11	2007	1	0	0	0	0	0	0	0	0	0	0	0	0		2	2	0	0	0
595		1	11	2007	1	0	0	0	0	0	0	0	0	0	0	0	0		2	2	0	0	0
596		1	11	2007	1	0	0	0	0	0	0	0	0	0	0	0	0		2	2	0	0	0
597		1	11	2007	1	0	0	0	0	0	0	0	0	0	0	0	0		2	2	0	0	0
598		1	11	2007	1	0	0	0	0	0	0	0	0	0	0	0	0		2	2	0	0	0
599		1	11	2007	1	0	0	0	0	0	0	0	0	0	0	0	0		2	2	0	0	0
600		1	11	2007	1	0	0	0	0	0	0	0	0	0	0	0	0		2	2	0	0	0
601		1	11	2007	1	0	0	0	0	0	0	0	0	0	0	0	0		2	2	0	0	0
602		1	11	2007	1	0	0	0	0	0	0	0	0	0	0	0	0		2	2	0	0	0
603		1	11	2007	1	0	0	0	0	0	0	0	0	0	0	0	0		2	2	0	0	0
604		1	11	2007	1	0	0	0	0	0	0	0	0	0	0	0	0		2	2	0	0	0
605		1	11	2007	1	0	0	0	0	0	0	0	0	0	0	0	0		2	2	0	0	0
606		1	11	2007	1	0	0	0	0	0	0	0	0	0	0	0	0		2	2	0	0	0
607		1	11	2007	1	0	0	0	0	0	0	0	0	0	0	0	0		2	2	0	0	0
608		1	11	2007	1	0	0	0	0	0	0	0	0	0	0	0	0		2	2	0	0	0
609		1	11	2007	1	0	0	0	0	0	0	0	0	0	0	0	0		2	2	0	0	0
610		1	11	2007	1	0	0	0	0	0	0	0	0	0	0	0	0		2	2	0	0	0
611		1	11	2007	1	0	0	0	0	0	0	0	0	0	0	0	0		2	2	0	0	0
612		1	11	2007	1	0	0	0	0	0	0	0	0	0	0	0	0		2	2	0	0	0
613		1	11	2007	1	0	0	0	0	0	0	0	0	0	0	0	0		2	2	0	0	0
614		1	11	2007	1	0	0	0	0	0	0	0	0	0	0	0	0		2	2	0	0	0
615		1	11	2007	1	0	0	0	0	0	0	0	0	0	0	0	0		2	2	0	0	0
616		1	11	2007	1	0	0	0	0	0	0	0	0	0	0	0	0		2	2	0	0	0
617		1	11	2007	1	0	0	0	0	0	0	0	0	0	0	0	0		2	2	0	0	0
618		1	11	2007	1	0	0	0	0	0	0	0	0	0	0	0	0		2	2	0	0	0
619		1	11	2007	1	0	0	0	0	0	0	0	0	0	0	0	0		2	2	0	0	0
620		1	11	2007	1	0	0	0	0	0	0	0	0	0	0	0	0		2	2	0	0	0
621		1	12	2007	1	0	0	0	0	0	0	0	0	0	0	0	0		2	2	0	0	0
622		1	12	2007	1	0	0	0	0	0	0	0	0	0	0	0	0		2	2	0	0	0
623		1	12	2007	1	0	0	0	0	0	0	0	0	0	0	0	0		2	2	0	0	0
624		1	12	2007	1	0	0	0	0	0	0	0	0	0	0	0	0		2	2	0	0	0
625		1	12	2007	1	0	0	0	0	0	0	0	0	0	0	0	0		2	2	0	0	0
626		1	12	2007	1	0	0	0	0	0	0	0	0	0	0	0	0		2	2	0	0	0
627		1	12	2007	1	0	0	0	0	0	0	0	0	0	0	0	0		2	2	0	0	0
628		1	12	2007	1	0	0	0	0	0	0	0	0	0	0	0	0		2	2	0	0	0
629		1	12	2007	1	0	0	0	0	0	0	0	0	0	0	0	0		2	2	0	0	0
630		1	12	2007	1	0	0	0	0	0	0	0	0	0	0	0	0		2	2	0	0	0
631		1	12	2007	1	0	0	0	0	0	0	0	0	0	0	0	0		2	2	0	0	0
632		1	12	2007	1	0	0	0	0	0	0	0	0	0	0	0	0		2	2	0	0	0
633		1	12	2007	1	0	0	0	0	0	0	0	0	0	0	0	0		2	2	0	0	0
634		1	12	2007	1	0	0	0	0	0	0	0	0	0	0	0	0		2	2	0	0	0
635		1	12	2007	1	0	0	0	0	0	0	0	0	0	0	0	0		2	2	0	0	0
636		1	12	2007	1	0	0	0	0	0	0	0	0	0	0	0	0		2	2	0	0	0
637		1	12	2007	1	0	0	0	0	0	0	0	0	0	0	0	0		2	2	0	0	0
638		1	12	2007	1	0	0	0	0	0	0	0	0	0	0	0	0		2	2	0	0	0
639		1	12	2007	1	0	0	0	0	0	0	0	0	0	0	0	0		2	2	0	0	0
640		1	12	2007	1	0	0	0	0	0	0	0	0	0	0	0	0		2	2	0	0	0
641		1	12	2007	1	0	0	0	0	0	0	0	0	0	0	0	0		2	2	0	0	0
642		1	12	2007	1	0	0	0	0	0	0	0	0	0	0	0	0		2	2	0	0	0
643		1	12	2007	1	0	0	0	0	0	0	0	0	0	0	0	0		2	2	0	0	0
644		1	12	2007	1	0	0	0	0	0	0	0	0	0	0	0	0		2	2	0	0	0
645		1	12	2007	1	0	0	0	0	0	0	0	0	0	0	0	0		2	2	0	0	0
646		1	12	2007	1	0	0	0	0	0	0	0	0	0	0	0	0		2	2	0	0	0
647		1	12	2007	1	0	0	0	0	0	0	0	0	0	0	0	0		2	2	0	0	0
648		1	12	2007	1	0	0	0	0	0	0	0	0	0	0	0	0		2	2	0	0	0
649		1	12	2007	1	0	0	0	0	0	0	0	0	0	0	0	0		2	2	0	0	0
650		1	12	2007	1	0	0	0	0	0	0	0	0	0	0	0	0		2	2	0	0	0
651		1	12	2007	1	0	0	0	0	0	0	0	0	0	0	0	0		2	2	0	0	0
652		1	12	2007	1	0	0	0	0	0	0	0	0	0	0	0	0		2	2	0	0	0
653		1	12	2007	1	0	0	0	0	0	0	0	0	0	0	0	0		2	2	0	0	0
654		1	12	2007	1	0	0	0	0	0	0	0	0	0	0	0	0		2	2	0	0	0
655		1	12	2007	1	0	0	0	0	0	0	0	0	0	0	0	0		2	2	0	0	0
656		1	12	2007	1	0	0	0	0	0	0	0	0	0	0	0	0		2	2	0	0	0
657		1	12	2007	1	0	0	0	0	0	0	0	0	0	0	0	0		2	2	0	0	0
658		1	12	2007	1	0	0	0	0	0	0	0	0	0	0	0	0		2	2	0	0	0
659		1	12	2007	1	0	0	0	0	0	0	0	0	0	0	0	0		2	2	0	0	0
660		1	12	2007	1	0	0	0	0	0	0	0	0	0	0	0	0		2	2	0	0	0
661		1	12	2007	1	0	0	0	0	0	0	0	0	0	0	0	0		2	2	0	0	0
662		1	12	2007	1	0	0	0	0	0	0	0	0	0	0	0	0		2	2	0	0	0
663		1	12	2007	1	0	0	0	0	0	0	0	0	0	0	0	0		2	2	0	0	0
664		1	12	2007	1	0	0	0	0	0	0	0	0	0	0	0	0		2	2	0	0	0
665		1	12	2007	1	0	0	0	0	0	0	0	0	0	0	0	0		2	2	0	0	0
666		1	12	2007	1	0	0	0	0	0	0	0	0	0	0	0	0		2	2	0	0	0
667		1	12	2007	1	0	0	0	0	0	0	0	0	0	0	0	0		2	2	0	0	0
668		1	12	2007	1	0	0	0	0	0	0	0	0	0	0	0	0		2	2	0	0	0
669		1	12	2007	1	0	0	0	0	0	0	0	0	0	0	0	0		2	2	0	0	0
670		1	12	2007	1	0	0	0	0	0	0	0	0	0	0	0	0		2	2	0	0	0
671		1	12	2007	1	0	0	0	0	0	0	0	0	0	0	0	0		2	2	0	0	0
672		1	12	2007	1	0	0	0	0	0	0	0	0	0	0	0	0		2	2	0	0	0
673		1	12	2007	1	0	0	0	0	0	0	0	0	0	0	0	0		2	2	0	0	0
674		1	12	2007	1	0	0	0	0	0	0	0	0	0	0	0	0		2	2	0	0	0
675		1	12	2007	1	0	0	0	0	0	0	0	0	0	0	0	0		2	2	0	0	0
676		1	12	2007	1	0	0	0	0	0	0	0	0	0	0	0	0		2	2	0	0	0
677		1	12	2007	1	0	0	0	0	0	0	0	0	0	0	0	0		2	2	0	0	0
678		1	12	2007	1	0	0	0	0	0	0	0	0	0	0	0	0		2	2	0	0	0
679		1	12	2007	1	0	0	0	0	0	0	0	0	0	0	0	0		2	2	0	0	0
680		1	12	2007	1	0	0	0	0	0	0	0	0	0	0	0	0		2	2	0	0	0
681		1	12	2007	1	0	0	0	0	0	0	0	0	0	0	0	0		2	2	0	0	0
682		1	12	2007	1	0	0	0	0	0	0	0	0	0	0	0	0		2	2	0	0	0
683		1	12	2007	1	0	0	0	0	0	0	0	0	0	0	0	0		2	2	0	0	0
684		1	12	2007	1	0	0	0	0	0	0	0	0	0	0	0	0		2	2	0	0	0
685		1	12	2007	1	0	0	0	0	0	0	0	0	0	0	0	0		2	2	0	0	0
686		1	12	2007	1	0	0	0	0	0	0	0	0	0	0	0	0		2	2	0	0	0
687		1	12	2007	1	0	0	0	0	0	0	0	0	0	0	0	0		2	2	0	0	0
688		1	12	2007	1	0	0	0	0	0	0	0	0	0	0	0	0		2	2	0	0	0
689		1	12	2007	1	0	0	0	0	0	0	0	0	0	0	0	0		2	2	0	0	0
690		1	12	2007	1	0	0	0	0	0	0	0	0	0	0	0	0		2	2	0	0	0
691		1	12	2007	1	0	0	0	0	0	0	0	0	0	0	0	0		2	2	0	0	0
692		1	12	2007	1	0	0	0	0	0	0	0	0	0	0	0	0		2	2	0	0	0
693		1	12	2007	1	0	0	0	0	0	0	0	0	0	0	0	0		2	2	0	0	0
694		1	12	2007	1	0	0	0	0	0	0	0	0	0	0	0	0		2	2	0	0	0
695		1	12	2007	1	0	0	0	0	0	0	0	0	0	0	0	0		2	2	0	0	0
696		1	12	2007	1	0	0	0	0	0	0	0	0	0	0	0	0		2	2	0	0	0
697		1	12	2007	1	0	0	0	0	0	0	0	0	0	0	0	0		2	2	0	0	0
698		1	12	2007	1	0	0	0	0	0	0	0	0	0	0	0	0		2	2	0	0	0
699		1	12	2007	1	0	0	0	0	0	0	0	0	0	0	0	0		2	2	0	0	0
700		1	12	2007	1	0	0	0	0	0	0	0	0	0	0	0	0		2	2	0	0	0
701		1	12	2007	1	0	0	0	0	0	0	0	0	0	0	0	0		2	2	0	0	0
702		1	12	2007	1	0	0	0	0	0	0	0	0	0	0	0	0		2	2	0	0	0
703		1	12	2007	1	0	0	0	0	0	0	0	0	0	0	0	0		2	2	0	0	0
704		1	12	2007	1	0	0	0	0	0	0	0	0	0	0	0	0		2	2	0	0	0
705		1	12	2007	1	0	0	0	0	0	0	0	0	0	0	0	0		2	2	0	0	0
706		1	12	2007	1	0	0	0	0	0	0	0	0	0	0	0	0		2	2	0	0	0
707		1	12	2007	1	0	0	0	0	0	0	0	0	0	0	0	0		2	2	0	0	0
708		1	12	2007	1	0	0	0	0	0	0	0	0	0	0	0	0		2	2	0	0	0
709		1	12	2007	1	0	0	0	0	0	0	0	0	0	0	0	0		2	2	0	0	0
710		1	12	2007	1	0	0	0	0	0	0	0	0	0	0	0	0		2	2	0	0	0
711		1	12	2007	1	0	0	0	0	0	0	0	0	0	0	0	0		2	2	0	0	0
712		1	12	2007	1	0	0	0	0	0	0	0	0	0	0	0	0		2	2	0	0	0
713		1	12	2007	1	0	0	0	0	0	0	0	0	0	0	0	0		2	2	0	0	0
714		1	12	2007	1	0	0	0	0	0	0	0	0	0	0	0	0		2	2	0	0	0
715		1	12	2007	1	0	0	0	0	0	0	0	0	0	0	0	0		2	2	0	0	0
716		1	12	2007	1	0	0	0	0	0	0	0	0	0	0	0	0		2	2	0	0	0
717		1	12	2007	1	0	0	0	0	0	0	0	0	0	0	0	0		2	2	0	0	0
718		1	12	2007	1	0	0	0	0	0	0	0	0	0	0	0	0		2	2	0	0	0
719		1	12	2007	1	0	0	0	0	0	0	0	0	0	0	0	0		2	2	0	0	0
720		1	12	2007	1	0	0	0	0	0	0	0	0	0	0	0	0		2	2	0	0	0
721		1	12	2007	1	0	0	0	0	0	0	0	0	0	0	0	0		2	2	0	0	0
722		1	12	2007	1	0	0	0	0	0	0	0	0	0	0	0	0		2	2	0	0	0
723		1	12	2007	1	0	0	0	0	0	0	0	0	0	0	0	0		2	2	0	0	0
724		1	12	2007	1	0	0	0	0	0	0	0	0	0	0	0	0		2	2	0	0	0
725		1	12	2007	1	0	0	0	0	0	0	0	0	0	0	0	0		2	2	0	0	0
726		1	12	2007	1	0	0	0	0	0	0	0	0	0	0	0	0		2	2	0	0	0
727		1	12	2007	1	0	0	0	0	0	0	0	0	0	0	0	0		2	2	0	0	0
728		1	12	2007	1	0	0	0	0	0	0	0	0	0	0	0	0		2	2	0	0	0
729		1	12	2007	1	0	0	0	0	0	0	0	0	0	0	0	0		2	2	0	0	0
730		1	12	2007	1	0	0	0	0	0	0	0	0	0	0	0	0		2	2	0	0	0
731		1	12	2007	1	0	0	0	0	0	0	0	0	0	0	0	0		2	2	0	0	0
732		1	12	2007	1	0	0	0	0	0	0	0	0	0	0	0	0		2	2	0	0	0
733		1	12	2007	1	0	0	0	0	0	0	0	0	0	0	0	0		2	2	0	0	0
734		1	12	2007	1	0	0	0	0	0	0	0	0	0	0	0	0		2	2	0	0	0
735		1	12	2007	1	0	0	0	0	0	0	0	0	0	0	0	0		2	2	0	0	0
736		1	12	2007	1	0	0	0	0	0	0	0	0	0	0	0	0		2	2	0	0	0
737		1	12	2007	1	0	0	0	0	0	0	0	0	0	0	0	0		2	2	0	0	0
738		1	12	2007	1	0	0	0	0	0	0	0	0	0	0	0	0		2	2	0	0	0
739		1	12	2007	1	0	0	0	0	0	0	0	0	0	0	0	0		2	2	0	0	0
740		1	12	2007	1	0	0	0	0	0	0	0	0	0	0	0	0		2	2	0	0	0
741		1	12	2007	1	0	0	0	0	0	0	0	0	0	0	0	0		2	2	0	0	0
742		1	12	2007	1	0	0	0	0	0	0	0	0	0	0	0	0		2	2	0	0	0
743		1	12	2007	1	0	0	0	0	0	0	0	0	0	0	0	0		2	2	0	0	0
744		1	12	2007	1	0	0	0	0	0	0	0	0	0	0	0	0		2	2	0	0	0
745		1	12	2007	1	0	0	0	0	0	0	0	0	0	0	0	0		2	2	0	0	0
746		1	12	2007	1	0	0	0	0	0	0	0	0	0	0	0	0		2	2	0	0	0
747		1	12	2007	1	0	0	0	0	0	0	0	0	0	0	0	0		2	2	0	0	0
748		1	12	2007	1	0	0	0	0	0	0	0	0	0	0	0	0		2	2	0	0	0
749		1	12	2007	1	0	0	0	0	0	0	0	0	0	0	0	0		2	2	0	0	0
750		1	12	2007	1	0	0	0	0	0	0	0	0	0	0	0	0		2	2	0	0	0
751		1	12	2007	1	0	0	0	0	0	0	0	0	0	0	0	0		2	2	0	0	0
752		1	12	2007	1	0	0	0	0	0	0	0	0	0	0	0	0		2	2	0	0	0
753		1	12	2007	1	0	0	0	0	0	0	0	0	0	0	0	0		2	2	0	0	0
754		1	12	2007	1	0	0	0	0	0	0	0	0	0	0	0	0		2	2	0	0	0
755		1	12	2007	1	0	0	0	0	0	0	0	0	0	0	0	0		2	2	0	0	0
756		1	12	2007	1	0	0	0	0	0	0	0	0	0	0	0	0		2	2	0	0	0
757		1	12	2007	1	0	0	0	0	0	0	0	0	0	0	0	0		1	2	0	0	0
758		1	12	2007	1	0	0	0	0	0	0	0	0	0	0	0	0		1	2	0	0	0
759		1	12	2007	1	0	0	0	0	0	0	0	0	0	0	0	0		1	2	0	0	0
760		1	12	2007	1	0	0	0	0	0	0	0	0	0	0	0	0		1	2	0	0	0
761		1	12	2007	1	0	0	0	0	0	0	0	0	0	0	0	0		1	2	0	0	0
762		1	12	2007	1	0	0	0	0	0	0	0	0	0	0	0	0		1	2	0	0	0
763		1	12	2007	1	0	0	0	0	0	0	0	0	0	0	0	0		1	2	0	0	0
764		1	12	2007	1	0	0	0	0	0	0	0	0	0	0	0	0		1	2	0	0	0
765		1	12	2007	1	0	0	0	0	0	0	0	0	0	0	0	0		1	2	0	0	0
766		1	12	2007	1	0	0	0	0	0	0	0	0	0	0	0	0		1	2	0	0	0
767		1	12	2007	1	0	0	0	0	0	0	0	0	0	0	0	0		1	2	0	0	0
768		1	12	2007	1	0	0	0	0	0	0	0	0	0	0	0	0		1	2	0	0	0
769		1	12	2007	1	0	0	0	0	0	0	0	0	0	0	0	0		1	2	0	0	0
770		1	12	2007	1	0	0	0	0	0	0	0	0	0	0	0	0		1	2	0	0	0
771		1	12	2007	1	0	0	0	0	0	0	0	0	0	0	0	0		1	2	0	0	0
772		1	12	2007	1	0	0	0	0	0	0	0	0	0	0	0	0		1	2	0	0	0
773		1	12	2007	1	0	0	0	0	0	0	0	0	0	0	0	0		1	2	0	0	0
774		1	12	2007	1	0	0	0	0	0	0	0	0	0	0	0	0		1	2	0	0	0
775		1	12	2007	1	0	0	0	0	0	0	0	0	0	0	0	0		1	2	0	0	0
776		1	12	2007	1	0	0	0	0	0	0	0	0	0	0	0	0		1	2	0	0	0
777		1	12	2007	1	0	0	0	0	0	0	0	0	0	0	0	0		1	2	0	0	0
778		1	12	2007	1	0	0	0	0	0	0	0	0	0	0	0	0		1	2	0	0	0
779		1	12	2007	1	0	0	0	0	0	0	0	0	0	0	0	0		1	2	0	0	0
780		1	12	2007	1	0	0	0	0	0	0	0	0	0	0	0	0		1	2	0	0	0
781		1	12	2007	1	0	0	0	0	0	0	0	0	0	0	0	0		1	2	0	0	0
782		1	12	2007	1	0	0	0	0	0	0	0	0	0	0	0	0		1	2	0	0	0
783		1	12	2007	1	0	0	0	0	0	0	0	0	0	0	0	0		1	2	0	0	0
784		1	12	2007	1	0	0	0	0	0	0	0	0	0	0	0	0		1	2	0	0	0
785		1	12	2007	1	0	0	0	0	0	0	0	0	0	0	0	0		1	2	0	0	0
786		1	12	2007	1	0	0	0	0	0	0	0	0	0	0	0	0		1	2	0	0	0
787		1	12	2007	1	0	0	0	0	0	0	0	0	0	0	0	0		1	2	0	0	0
788		1	12	2007	1	0	0	0	0	0	0	0	0	0	0	0	0		1	2	0	0	0
789		1	12	2007	1	0	0	0	0	0	0	0	0	0	0	0	0		1	2	0	0	0
790		1	12	2007	1	0	0	0	0	0	0	0	0	0	0	0	0		1	2	0	0	0
791		1	12	2007	1	0	0	0	0	0	0	0	0	0	0	0	0		1	2	0	0	0
792		1	12	2007	1	0	0	0	0	0	0	0	0	0	0	0	0		1	2	0	0	0
793		1	12	2007	1	0	0	0	0	0	0	0	0	0	0	0	0		1	2	0	0	0
794		1	12	2007	1	0	0	0	0	0	0	0	0	0	0	0	0		1	2	0	0	0
795		1	12	2007	1	0	0	0	0	0	0	0	0	0	0	0	0		1	2	0	0	0
796		1	12	2007	1	0	0	0	0	0	0	0	0	0	0	0	0		1	2	0	0	0
797		1	12	2007	1	0	0	0	0	0	0	0	0	0	0	0	0		1	2	0	0	0
798		1	12	2007	1	0	0	0	0	0	0	0	0	0	0	0	0		1	2	0	0	0
799		1	12	2007	1	0	0	0	0	0	0	0	0	0	0	0	0		1	2	0	0	0
800		1	12	2007	1	0	0	0	0	0	0	0	0	0	0	0	0		1	2	0	0	0
801		1	12	2007	1	0	0	0	0	0	0	0	0	0	0	0	0		1	2	0	0	0
802		1	12	2007	1	0	0	0	0	0	0	0	0	0	0	0	0		1	2	0	0	0
803		1	12	2007	1	0	0	0	0	0	0	0	0	0	0	0	0		1	2	0	0	0
804		1	12	2007	1	0	0	0	0	0	0	0	0	0	0	0	0		1	2	0	0	0
805		1	12	2007	1	0	0	0	0	0	0	0	0	0	0	0	0		1	2	0	0	0
806		1	12	2007	1	0	0	0	0	0	0	0	0	0	0	0	0		1	2	0	0	0
807		1	12	2007	1	0	0	0	0	0	0	0	0	0	0	0	0		1	2	0	0	0
808		1	12	2007	1	0	0	0	0	0	0	0	0	0	0	0	0		1	2	0	0	0
809		1	12	2007	1	0	0	0	0	0	0	0	0	0	0	0	0		1	2	0	0	0
810		1	12	2007	1	0	0	0	0	0	0	0	0	0	0	0	0		1	2	0	0	0
811		1	12	2007	1	0	0	0	0	0	0	0	0	0	0	0	0		1	2	0	0	0
812		1	12	2007	1	0	0	0	0	0	0	0	0	0	0	0	0		1	2	0	0	0
813		1	12	2007	1	0	0	0	0	0	0	0	0	0	0	0	0		1	2	0	0	0
814		1	12	2007	1	0	0	0	0	0	0	0	0	0	0	0	0		1	2	0	0	0
815		1	12	2007	1	0	0	0	0	0	0	0	0	0	0	0	0		1	2	0	0	0
816		1	12	2007	1	0	0	0	0	0	0	0	0	0	0	0	0		1	2	0	0	0
817		1	12	2007	1	0	0	0	0	0	0	0	0	0	0	0	0		1	2	0	0	0
818		1	12	2007	1	0	0	0	0	0	0	0	0	0	0	0	0		1	2	0	0	0
819		1	12	2007	1	0	0	0	0	0	0	0	0	0	0	0	0		1	2	0	0	0
820		1	12	2007	1	0	0	0	0	0	0	0	0	0	0	0	0		1	2	0	0	0
821		1	12	2007	1	0	0	0	0	0	0	0	0	0	0	0	0		1	2	0	0	0
822		1	12	2007	1	0	0	0	0	0	0	0	0	0	0	0	0		1	2	0	0	0
823		1	12	2007	1	0	0	0	0	0	0	0	0	0	0	0	0		1	2	0	0	0
824		1	12	2007	1	0	0	0	0	0	0	0	0	0	0	0	0		1	2	0	0	0
825		1	12	2007	1	0	0	0	0	0	0	0	0	0	0	0	0		1	2	0	0	0
826		1	12	2007	1	0	0	0	0	0	0	0	0	0	0	0	0		1	2	0	0	0
827		1	12	2007	1	0	0	0	0	0	0	0	0	0	0	0	0		1	2	0	0	0
828		1	12	2007	1	0	0	0	0	0	0	0	0	0	0	0	0		1	2	0	0	0
829		1	12	2007	1	0	0	0	0	0	0	0	0	0	0	0	0		1	2	0	0	0
830		1	12	2007	1	0	0	0	0	0	0	0	0	0	0	0	0		1	2	0	0	0
831		1	12	2007	1	0	0	0	0	0	0	0	0	0	0	0	0		1	2	0	0	0
832		1	12	2007	1	0	0	0	0	0	0	0	0	0	0	0	0		1	2	0	0	0
833		1	12	2007	1	0	0	0	0	0	0	0	0	0	0	0	0		1	2	0	0	0
834		1	12	2007	1	0	0	0	0	0	0	0	0	0	0	0	0		1	2	0	0	0
835		1	12	2007	1	0	0	0	0	0	0	0	0	0	0	0	0		1	2	0	0	0
836		1	12	2007	1	0	0	0	0	0	0	0	0	0	0	0	0		1	2	0	0	0
837		1	12	2007	1	0	0	0	0	0	0	0	0	0	0	0	0		1	2	0	0	0
838		1	12	2007	1	0	0	0	0	0	0	0	0	0	0	0	0		1	2	0	0	0
839		1	12	2007	1	0	0	0	0	0	0	0	0	0	0	0	0		1	2	0	0	0
840		1	12	2007	1	0	0	0	0	0	0	0	0	0	0	0	0		1	2	0	0	0
841		1	12	2007	1	0	0	0	0	0	0	0	0	0	0	0	0		1	2	0	0	0
842		1	12	2007	1	0	0	0	0	0	0	0	0	0	0	0	0		1	2	0	0	0
843		1	12	2007	1	0	0	0	0	0	0	0	0	0	0	0	0		1	2	0	0	0
844		1	12	2007	1	0	0	0	0	0	0	0	0	0	0	0	0		1	2	0	0	0
845		1	12	2007	1	0	0	0	0	0	0	0	0	0	0	0	0		1	2	0	0	0
846		1	12	2007	1	0	0	0	0	0	0	0	0	0	0	0	0		1	2	0	0	0
847		1	12	2007	1	0	0	0	0	0	0	0	0	0	0	0	0		1	2	0	0	0
848		1	12	2007	1	0	0	0	0	0	0	0	0	0	0	0	0		1	2	0	0	0
849		1	12	2007	1	0	0	0	0	0	0	0	0	0	0	0	0		1	2	0	0	0
850		1	12	2007	1	0	0	0	0	0	0	0	0	0	0	0	0		1	2	0	0	0
851		1	12	2007	1	0	0	0	0	0	0	0	0	0	0	0	0		1	2	0	0	0
852		1	12	2007	1	0	0	0	0	0	0	0	0	0	0	0	0		1	2	0	0	0
853		1	12	2007	1	0	0	0	0	0	0	0	0	0	0	0	0		1	2	0	0	0
854		1	12	2007	1	0	0	0	0	0	0	0	0	0	0	0	0		1	2	0	0	0
855		1	12	2007	1	0	0	0	0	0	0	0	0	0	0	0	0		1	2	0	0	0
856		1	12	2007	1	0	0	0	0	0	0	0	0	0	0	0	0		1	2	0	0	0
857		1	12	2007	1	0	0	0	0	0	0	0	0	0	0	0	0		1	2	0	0	0
858		1	12	2007	1	0	0	0	0	0	0	0	0	0	0	0	0		1	2	0	0	0
859		1	12	2007	1	0	0	0	0	0	0	0	0	0	0	0	0		1	2	0	0	0
860		1	12	2007	1	0	0	0	0	0	0	0	0	0	0	0	0		1	2	0	0	0
861		1	12	2007	1	0	0	0	0	0	0	0	0	0	0	0	0		1	2	0	0	0
862		1	12	2007	1	0	0	0	0	0	0	0	0	0	0	0	0		1	2	0	0	0
863		1	12	2007	1	0	0	0	0	0	0	0	0	0	0	0	0		1	2	0	0	0
864		1	12	2007	1	0	0	0	0	0	0	0	0	0	0	0	0		1	2	0	0	0
865		1	12	2007	1	0	0	0	0	0	0	0	0	0	0	0	0		1	2	0	0	0
866		1	12	2007	1	0	0	0	0	0	0	0	0	0	0	0	0		1	2	0	0	0
867		1	12	2007	1	0	0	0	0	0	0	0	0	0	0	0	0		1	2	0	0	0
868		1	12	2007	1	0	0	0	0	0	0	0	0	0	0	0	0		1	2	0	0	0
869		1	12	2007	1	0	0	0	0	0	0	0	0	0	0	0	0		1	2	0	0	0
870		1	12	2007	1	0	0	0	0	0	0	0	0	0	0	0	0		1	2	0	0	0
871		1	12	2007	1	0	0	0	0	0	0	0	0	0	0	0	0		1	2	0	0	0
872		1	12	2007	1	0	0	0	0	0	0	0	0	0	0	0	0		1	2	0	0	0
873		1	12	2007	1	0	0	0	0	0	0	0	0	0	0	0	0		1	2	0	0	0
874		1	12	2007	1	0	0	0	0	0	0	0	0	0	0	0	0		1	2	0	0	0
875		1	12	2007	1	0	0	0	0	0	0	0	0	0	0	0	0		1	2	0	0	0
876		1	12	2007	1	0	0	0	0	0	0	0	0	0	0	0	0		1	2	0	0	0
877		1	12	2007	1	0	0	0	0	0	0	0	0	0	0	0	0		1	2	0	0	0
878		1	12	2007	1	0	0	0	0	0	0	0	0	0	0	0	0		1	2	0	0	0
879		1	12	2007	1	0	0	0	0	0	0	0	0	0	0	0	0		1	2	0	0	0
880		1	12	2007	1	0	0	0	0	0	0	0	0	0	0	0	0		1	2	0	0	0
881		1	12	2007	1	0	0	0	0	0	0	0	0	0	0	0	0		1	2	0	0	0
882		1	12	2007	1	0	0	0	0	0	0	0	0	0	0	0	0		1	2	0	0	0
883		1	12	2007	1	0	0	0	0	0	0	0	0	0	0	0	0		1	2	0	0	0
884		1	12	2007	1	0	0	0	0	0	0	0	0	0	0	0	0		1	2	0	0	0
885		1	12	2007	1	0	0	0	0	0	0	0	0	0	0	0	0		1	2	0	0	0
886		1	12	2007	1	0	0	0	0	0	0	0	0	0	0	0	0		1	2	0	0	0
887		1	12	2007	1	0	0	0	0	0	0	0	0	0	0	0	0		1	2	0	0	0
888		1	12	2007	1	0	0	0	0	0	0	0	0	0	0	0	0		1	2	0	0	0
889		1	12	2007	1	0	0	0	0	0	0	0	0	0	0	0	0		1	2	0	0	0
890		1	12	2007	1	0	0	0	0	0	0	0	0	0	0	0	0		1	2	0	0	0
891		1	12	2007	1	0	0	0	0	0	0	0	0	0	0	0	0		1	2	0	0	0
892		1	12	2007	1	0	0	0	0	0	0	0	0	0	0	0	0		1	2	0	0	0
893		1	12	2007	1	0	0	0	0	0	0	0	0	0	0	0	0		1	2	0	0	0
894		1	12	2007	1	0	0	0	0	0	0	0	0	0	0	0	0		1	2	0	0	0
895		1	12	2007	1	0	0	0	0	0	0	0	0	0	0	0	0		1	2	0	0	0
896		1	12	2007	1	0	0	0	0	0	0	0	0	0	0	0	0		1	2	0	0	0
897		1	12	2007	1	0	0	0	0	0	0	0	0	0	0	0	0		1	2	0	0	0
898		1	12	2007	1	0	0	0	0	0	0	0	0	0	0	0	0		1	2	0	0	0
899		1	12	2007	1	0	0	0	0	0	0	0	0	0	0	0	0		1	2	0	0	0
900		1	12	2007	1	0	0	0	0	0	0	0	0	0	0	0	0		1	2	0	0	0
901		1	12	2007	1	0	0	0	0	0	0	0	0	0	0	0	0		1	2	0	0	0
902		1	12	2007	1	0	0	0	0	0	0	0	0	0	0	0	0		1	2	0	0	0
903		1	12	2007	1	0	0	0	0	0	0	0	0	0	0	0	0		1	2	0	0	0
904		1	12	2007	1	0	0	0	0	0	0	0	0	0	0	0	0		1	2	0	0	0
905		1	12	2007	1	0	0	0	0	0	0	0	0	0	0	0	0		1	2	0	0	0
906		1	12	2007	1	0	0	0	0	0	0	0	0	0	0	0	0		1	2	0	0	0
907		1	12	2007	1	0	0	0	0	0	0	0	0	0	0	0	0		1	2	0	0	0
908		1	12	2007	1	0	0	0	0	0	0	0	0	0	0	0	0		1	2	0	0	0
909		1	12	2007	1	0	0	0	0	0	0	0	0	0	0	0	0		1	2	0	0	0
910		1	12	2007	1	0	0	0	0	0	0	0	0	0	0	0	0		1	2	0	0	0
911		1	12	2007	1	0	0	0	0	0	0	0	0	0	0	0	0		1	2	0	0	0
912		1	12	2007	1	0	0	0	0	0	0	0	0	0	0	0	0		1	2	0	0	0
913		1	12	2007	1	0	0	0	0	0	0	0	0	0	0	0	0		1	2	0	0	0
914		1	12	2007	1	0	0	0	0	0	0	0	0	0	0	0	0		1	2	0	0	0
915		1	12	2007	1	0	0	0	0	0	0	0	0	0	0	0	0		1	2	0	0	0
916		1	12	2007	1	0	0	0	0	0	0	0	0	0	0	0	0		1	2	0	0	0
917		1	12	2007	1	0	0	0	0	0	0	0	0	0	0	0	0		1	2	0	0	0
918		1	12	2007	1	0	0	0	0	0	0	0	0	0	0	0	0		1	2	0	0	0
919		1	12	2007	1	0	0	0	0	0	0	0	0	0	0	0	0		1	2	0	0	0
920		1	12	2007	1	0	0	0	0	0	0	0	0	0	0	0	0		1	2	0	0	0
921		1	12	2007	1	0	0	0	0	0	0	0	0	0	0	0	0		1	2	0	0	0
922		1	12	2007	1	0	0	0	0	0	0	0	0	0	0	0	0		1	2	0	0	0
923		1	12	2007	1	0	0	0	0	0	0	0	0	0	0	0	0		1	2	0	0	0
924		1	12	2007	1	0	0	0	0	0	0	0	0	0	0	0	0		1	2	0	0	0
925		1	12	2007	1	0	0	0	0	0	0	0	0	0	0	0	0		1	2	0	0	0
926		1	12	2007	1	0	0	0	0	0	0	0	0	0	0	0	0		1	2	0	0	0
927		1	12	2007	1	0	0	0	0	0	0	0	0	0	0	0	0		1	2	0	0	0
928		1	12	2007	1	0	0	0	0	0	0	0	0	0	0	0	0		1	2	0	0	0
929		1	12	2007	1	0	0	0	0	0	0	0	0	0	0	0	0		1	2	0	0	0
930		1	12	2007	1	0	0	0	0	0	0	0	0	0	0	0	0		1	2	0	0	0
931		1	12	2007	1	0	0	0	0	0	0	0	0	0	0	0	0		1	2	0	0	0
932		1	12	2007	1	0	0	0	0	0	0	0	0	0	0	0	0		1	2	0	0	0
933		1	12	2007	1	0	0	0	0	0	0	0	0	0	0	0	0		1	2	0	0	0
934		1	12	2007	1	0	0	0	0	0	0	0	0	0	0	0	0		1	2	0	0	0
935		1	12	2007	1	0	0	0	0	0	0	0	0	0	0	0	0		1	2	0	0	0
936		1	12	2007	1	0	0	0	0	0	0	0	0	0	0	0	0		1	2	0	0	0
937		1	12	2007	1	0	0	0	0	0	0	0	0	0	0	0	0		1	2	0	0	0
938		1	12	2007	1	0	0	0	0	0	0	0	0	0	0	0	0		1	2	0	0	0
939		1	12	2007	1	0	0	0	0	0	0	0	0	0	0	0	0		1	2	0	0	0
940		1	12	2007	1	0	0	0	0	0	0	0	0	0	0	0	0		1	2	0	0	0
941		1	12	2007	1	0	0	0	0	0	0	0	0	0	0	0	0		1	2	0	0	0
942		1	12	2007	1	0	0	0	0	0	0	0	0	0	0	0	0		1	2	0	0	0
943		1	12	2007	1	0	0	0	0	0	0	0	0	0	0	0	0		1	2	0	0	0
944		1	12	2007	1	0	0	0	0	0	0	0	0	0	0	0	0		1	2	0	0	0
945		1	12	2007	1	0	0	0	0	0	0	0	0	0	0	0	0		1	2	0	0	0
946		1	12	2007	1	0	0	0	0	0	0	0	0	0	0	0	0		1	2	0	0	0
947		1	12	2007	1	0	0	0	0	0	0	0	0	0	0	0	0		1	2	0	0	0
948		1	12	2007	1	0	0	0	0	0	0	0	0	0	0	0	0		1	2	0	0	0
949		1	12	2007	1	0	0	0	0	0	0	0	0	0	0	0	0		1	2	0	0	0
950		1	12	2007	1	0	0	0	0	0	0	0	0	0	0	0	0		1	2	0	0	0
951		1	12	2007	1	0	0	0	0	0	0	0	0	0	0	0	0		1	2	0	0	0
952		1	12	2007	1	0	0	0	0	0	0	0	0	0	0	0	0		1	2	0	0	0
953		1	12	2007	1	0	0	0	0	0	0	0	0	0	0	0	0		1	2	0	0	0
954		1	12	2007	1	0	0	0	0	0	0	0	0	0	0	0	0		1	2	0	0	0
955		1	12	2007	1	0	0	0	0	0	0	0	0	0	0	0	0		1	2	0	0	0
956		1	12	2007	1	0	0	0	0	0	0	0	0	0	0	0	0		1	2	0	0	0
957		1	12	2007	1	0	0	0	0	0	0	0	0	0	0	0	0		1	2	0	0	0
958		1	12	2007	1	0	0	0	0	0	0	0	0	0	0	0	0		1	2	0	0	0
959		1	12	2007	1	0	0	0	0	0	0	0	0	0	0	0	0		1	2	0	0	0
960		1	12	2007	1	0	0	0	0	0	0	0	0	0	0	0	0		1	2	0	0	0
961		1	12	2007	1	0	0	0	0	0	0	0	0	0	0	0	0		1	2	0	0	0
962		1	12	2007	1	0	0	0	0	0	0	0	0	0	0	0	0		1	2	0	0	0
963		1	12	2007	1	0	0	0	0	0	0	0	0	0	0	0	0		1	2	0	0	0
964		1	1	2008	1	0	0	0	0	0	0	0	0	0	0	0	0		2	2	0	0	0
965		1	1	2008	1	0	0	0	0	0	0	0	0	0	0	0	0		2	2	0	0	0
966		1	1	2008	1	0	0	0	0	0	0	0	0	0	0	0	0		2	2	0	0	0
967		1	1	2008	1	0	0	0	0	0	0	0	0	0	0	0	0		2	2	0	0	0
968		1	1	2008	1	0	0	0	0	0	0	0	0	0	0	0	0		2	2	0	0	0
969		1	1	2008	1	0	0	0	0	0	0	0	0	0	0	0	0		2	2	0	0	0
970		1	1	2008	1	0	0	0	0	0	0	0	0	0	0	0	0		2	2	0	0	0
971		1	1	2008	1	0	0	0	0	0	0	0	0	0	0	0	0		2	2	0	0	0
972		1	1	2008	1	0	0	0	0	0	0	0	0	0	0	0	0		2	2	0	0	0
973		1	1	2008	1	0	0	0	0	0	0	0	0	0	0	0	0		2	2	0	0	0
974		1	1	2008	1	0	0	0	0	0	0	0	0	0	0	0	0		2	2	0	0	0
975		1	1	2008	1	0	0	0	0	0	0	0	0	0	0	0	0		2	2	0	0	0
976		1	1	2008	1	0	0	0	0	0	0	0	0	0	0	0	0		2	2	0	0	0
977		1	1	2008	1	0	0	0	0	0	0	0	0	0	0	0	0		2	2	0	0	0
978		1	1	2008	1	0	0	0	0	0	0	0	0	0	0	0	0		2	2	0	0	0
979		1	1	2008	1	0	0	0	0	0	0	0	0	0	0	0	0		2	2	0	0	0
980		1	1	2008	1	0	0	0	0	0	0	0	0	0	0	0	0		2	2	0	0	0
981		1	1	2008	1	0	0	0	0	0	0	0	0	0	0	0	0		2	2	0	0	0
982		1	1	2008	1	0	0	0	0	0	0	0	0	0	0	0	0		2	2	0	0	0
983		1	1	2008	1	0	0	0	0	0	0	0	0	0	0	0	0		2	2	0	0	0
984		1	1	2008	1	0	0	0	0	0	0	0	0	0	0	0	0		2	2	0	0	0
985		1	1	2008	1	0	0	0	0	0	0	0	0	0	0	0	0		2	2	0	0	0
986		1	1	2008	1	0	0	0	0	0	0	0	0	0	0	0	0		2	2	0	0	0
987		1	1	2008	1	0	0	0	0	0	0	0	0	0	0	0	0		2	2	0	0	0
988		1	1	2008	1	0	0	0	0	0	0	0	0	0	0	0	0		2	2	0	0	0
989		1	1	2008	1	0	0	0	0	0	0	0	0	0	0	0	0		2	2	0	0	0
990		1	1	2008	1	0	0	0	0	0	0	0	0	0	0	0	0		2	2	0	0	0
991		1	1	2008	1	0	0	0	0	0	0	0	0	0	0	0	0		2	2	0	0	0
992		1	1	2008	1	0	0	0	0	0	0	0	0	0	0	0	0		2	2	0	0	0
993		1	1	2008	1	0	0	0	0	0	0	0	0	0	0	0	0		2	2	0	0	0
994		1	1	2008	1	0	0	0	0	0	0	0	0	0	0	0	0		2	2	0	0	0
995		1	1	2008	1	0	0	0	0	0	0	0	0	0	0	0	0		2	2	0	0	0
996		1	1	2008	1	0	0	0	0	0	0	0	0	0	0	0	0		2	2	0	0	0
997		1	1	2008	1	0	0	0	0	0	0	0	0	0	0	0	0		2	2	0	0	0
998		1	1	2008	1	0	0	0	0	0	0	0	0	0	0	0	0		2	2	0	0	0
999		1	1	2008	1	0	0	0	0	0	0	0	0	0	0	0	0		2	2	0	0	0
1000		1	1	2008	1	0	0	0	0	0	0	0	0	0	0	0	0		2	2	0	0	0
1001		1	1	2008	1	0	0	0	0	0	0	0	0	0	0	0	0		2	2	0	0	0
1002		1	1	2008	1	0	0	0	0	0	0	0	0	0	0	0	0		2	2	0	0	0
1003		1	1	2008	1	0	0	0	0	0	0	0	0	0	0	0	0		2	2	0	0	0
1004		1	1	2008	1	0	0	0	0	0	0	0	0	0	0	0	0		2	2	0	0	0
1005		1	1	2008	1	0	0	0	0	0	0	0	0	0	0	0	0		2	2	0	0	0
1006		1	1	2008	1	0	0	0	0	0	0	0	0	0	0	0	0		2	2	0	0	0
1007		1	1	2008	1	0	0	0	0	0	0	0	0	0	0	0	0		2	2	0	0	0
1008		1	1	2008	1	0	0	0	0	0	0	0	0	0	0	0	0		2	2	0	0	0
1009		1	1	2008	1	0	0	0	0	0	0	0	0	0	0	0	0		2	2	0	0	0
1010		1	1	2008	1	0	0	0	0	0	0	0	0	0	0	0	0		2	2	0	0	0
1011		1	1	2008	1	0	0	0	0	0	0	0	0	0	0	0	0		2	2	0	0	0
1012		1	1	2008	1	0	0	0	0	0	0	0	0	0	0	0	0		2	2	0	0	0
1013		1	1	2008	1	0	0	0	0	0	0	0	0	0	0	0	0		2	2	0	0	0
1014		1	1	2008	1	0	0	0	0	0	0	0	0	0	0	0	0		2	2	0	0	0
1015		1	1	2008	1	0	0	0	0	0	0	0	0	0	0	0	0		2	2	0	0	0
1016		1	1	2008	1	0	0	0	0	0	0	0	0	0	0	0	0		2	2	0	0	0
1017		1	1	2008	1	0	0	0	0	0	0	0	0	0	0	0	0		2	2	0	0	0
1018		1	1	2008	1	0	0	0	0	0	0	0	0	0	0	0	0		2	2	0	0	0
1019		1	1	2008	1	0	0	0	0	0	0	0	0	0	0	0	0		2	2	0	0	0
1020		1	1	2008	1	0	0	0	0	0	0	0	0	0	0	0	0		2	2	0	0	0
1021		1	1	2008	1	0	0	0	0	0	0	0	0	0	0	0	0		2	2	0	0	0
1022		1	1	2008	1	0	0	0	0	0	0	0	0	0	0	0	0		2	2	0	0	0
1023		1	1	2008	1	0	0	0	0	0	0	0	0	0	0	0	0		2	2	0	0	0
1024		1	1	2008	1	0	0	0	0	0	0	0	0	0	0	0	0		2	2	0	0	0
1025		1	1	2008	1	0	0	0	0	0	0	0	0	0	0	0	0		2	2	0	0	0
1026		1	1	2008	1	0	0	0	0	0	0	0	0	0	0	0	0		2	2	0	0	0
1027		1	1	2008	1	0	0	0	0	0	0	0	0	0	0	0	0		2	2	0	0	0
1028		1	1	2008	1	0	0	0	0	0	0	0	0	0	0	0	0		2	2	0	0	0
1029		1	1	2008	1	0	0	0	0	0	0	0	0	0	0	0	0		2	2	0	0	0
1030		1	1	2008	1	0	0	0	0	0	0	0	0	0	0	0	0		2	2	0	0	0
1031		1	1	2008	1	0	0	0	0	0	0	0	0	0	0	0	0		2	2	0	0	0
1032		1	1	2008	1	0	0	0	0	0	0	0	0	0	0	0	0		2	2	0	0	0
1033		1	1	2008	1	0	0	0	0	0	0	0	0	0	0	0	0		2	2	0	0	0
1034		1	1	2008	1	0	0	0	0	0	0	0	0	0	0	0	0		2	2	0	0	0
1035		1	1	2008	1	0	0	0	0	0	0	0	0	0	0	0	0		2	2	0	0	0
1036		1	1	2008	1	0	0	0	0	0	0	0	0	0	0	0	0		2	2	0	0	0
1037		1	1	2008	1	0	0	0	0	0	0	0	0	0	0	0	0		2	2	0	0	0
1038		1	1	2008	1	0	0	0	0	0	0	0	0	0	0	0	0		2	2	0	0	0
1039		1	1	2008	1	0	0	0	0	0	0	0	0	0	0	0	0		2	2	0	0	0
1040		1	1	2008	1	0	0	0	0	0	0	0	0	0	0	0	0		2	2	0	0	0
1041		1	1	2008	1	0	0	0	0	0	0	0	0	0	0	0	0		2	2	0	0	0
1042		1	1	2008	1	0	0	0	0	0	0	0	0	0	0	0	0		2	2	0	0	0
1043		1	1	2008	1	0	0	0	0	0	0	0	0	0	0	0	0		2	2	0	0	0
1044		1	1	2008	1	0	0	0	0	0	0	0	0	0	0	0	0		2	2	0	0	0
1045		1	1	2008	1	0	0	0	0	0	0	0	0	0	0	0	0		2	2	0	0	0
1046		1	1	2008	1	0	0	0	0	0	0	0	0	0	0	0	0		2	2	0	0	0
1047		1	1	2008	1	0	0	0	0	0	0	0	0	0	0	0	0		2	2	0	0	0
1048		1	1	2008	1	0	0	0	0	0	0	0	0	0	0	0	0		2	2	0	0	0
1049		1	1	2008	1	0	0	0	0	0	0	0	0	0	0	0	0		2	2	0	0	0
1050		1	1	2008	1	0	0	0	0	0	0	0	0	0	0	0	0		2	2	0	0	0
1051		1	1	2008	1	0	0	0	0	0	0	0	0	0	0	0	0		2	2	0	0	0
1052		1	1	2008	1	0	0	0	0	0	0	0	0	0	0	0	0		2	2	0	0	0
1053		1	1	2008	1	0	0	0	0	0	0	0	0	0	0	0	0		2	2	0	0	0
1054		1	1	2008	1	0	0	0	0	0	0	0	0	0	0	0	0		2	2	0	0	0
1055		1	1	2008	1	0	0	0	0	0	0	0	0	0	0	0	0		2	2	0	0	0
1056		1	1	2008	1	0	0	0	0	0	0	0	0	0	0	0	0		2	2	0	0	0
1057		1	1	2008	1	0	0	0	0	0	0	0	0	0	0	0	0		2	2	0	0	0
1058		1	1	2008	1	0	0	0	0	0	0	0	0	0	0	0	0		2	2	0	0	0
1059		1	1	2008	1	0	0	0	0	0	0	0	0	0	0	0	0		2	2	0	0	0
1060		1	1	2008	1	0	0	0	0	0	0	0	0	0	0	0	0		2	2	0	0	0
1061		1	1	2008	1	0	0	0	0	0	0	0	0	0	0	0	0		2	2	0	0	0
1062		1	1	2008	1	0	0	0	0	0	0	0	0	0	0	0	0		2	2	0	0	0
1063		1	1	2008	1	0	0	0	0	0	0	0	0	0	0	0	0		2	2	0	0	0
1064		1	1	2008	1	0	0	0	0	0	0	0	0	0	0	0	0		2	2	0	0	0
1065		1	1	2008	1	0	0	0	0	0	0	0	0	0	0	0	0		2	2	0	0	0
1066		1	1	2008	1	0	0	0	0	0	0	0	0	0	0	0	0		2	2	0	0	0
1067		1	1	2008	1	0	0	0	0	0	0	0	0	0	0	0	0		2	2	0	0	0
1068		1	1	2008	1	0	0	0	0	0	0	0	0	0	0	0	0		2	2	0	0	0
1069		1	1	2008	1	0	0	0	0	0	0	0	0	0	0	0	0		2	2	0	0	0
1070		1	1	2008	1	0	0	0	0	0	0	0	0	0	0	0	0		2	2	0	0	0
1071		1	1	2008	1	0	0	0	0	0	0	0	0	0	0	0	0		2	2	0	0	0
1072		1	1	2008	1	0	0	0	0	0	0	0	0	0	0	0	0		2	2	0	0	0
1073		1	1	2008	1	0	0	0	0	0	0	0	0	0	0	0	0		2	2	0	0	0
1074		1	1	2008	1	0	0	0	0	0	0	0	0	0	0	0	0		2	2	0	0	0
1075		1	1	2008	1	0	0	0	0	0	0	0	0	0	0	0	0		2	2	0	0	0
1076		1	1	2008	1	0	0	0	0	0	0	0	0	0	0	0	0		2	2	0	0	0
1077		1	1	2008	1	0	0	0	0	0	0	0	0	0	0	0	0		2	2	0	0	0
1078		1	1	2008	1	0	0	0	0	0	0	0	0	0	0	0	0		2	2	0	0	0
1079		1	1	2008	1	0	0	0	0	0	0	0	0	0	0	0	0		2	2	0	0	0
1080		1	1	2008	1	0	0	0	0	0	0	0	0	0	0	0	0		2	2	0	0	0
1081		1	1	2008	1	0	0	0	0	0	0	0	0	0	0	0	0		2	2	0	0	0
1082		1	1	2008	1	0	0	0	0	0	0	0	0	0	0	0	0		2	2	0	0	0
1083		1	1	2008	1	0	0	0	0	0	0	0	0	0	0	0	0		2	2	0	0	0
1084		1	1	2008	1	0	0	0	0	0	0	0	0	0	0	0	0		2	2	0	0	0
1085		1	1	2008	1	0	0	0	0	0	0	0	0	0	0	0	0		2	2	0	0	0
1086		1	1	2008	1	0	0	0	0	0	0	0	0	0	0	0	0		2	2	0	0	0
1087		1	1	2008	1	0	0	0	0	0	0	0	0	0	0	0	0		2	2	0	0	0
1088		1	1	2008	1	0	0	0	0	0	0	0	0	0	0	0	0		2	2	0	0	0
1089		1	1	2008	1	0	0	0	0	0	0	0	0	0	0	0	0		2	2	0	0	0
1090		1	1	2008	1	0	0	0	0	0	0	0	0	0	0	0	0		2	2	0	0	0
1091		1	1	2008	1	0	0	0	0	0	0	0	0	0	0	0	0		2	2	0	0	0
1092		1	1	2008	1	0	0	0	0	0	0	0	0	0	0	0	0		2	2	0	0	0
1093		1	1	2008	1	0	0	0	0	0	0	0	0	0	0	0	0		2	2	0	0	0
1094		1	1	2008	1	0	0	0	0	0	0	0	0	0	0	0	0		2	2	0	0	0
1095		1	1	2008	1	0	0	0	0	0	0	0	0	0	0	0	0		2	2	0	0	0
1096		1	1	2008	1	0	0	0	0	0	0	0	0	0	0	0	0		2	2	0	0	0
1097		1	1	2008	1	0	0	0	0	0	0	0	0	0	0	0	0		2	2	0	0	0
1098		1	1	2008	1	0	0	0	0	0	0	0	0	0	0	0	0		2	2	0	0	0
1099		1	1	2008	1	0	0	0	0	0	0	0	0	0	0	0	0		2	2	0	0	0
1100		1	1	2008	1	0	0	0	0	0	0	0	0	0	0	0	0		2	2	0	0	0
1101		1	1	2008	1	0	0	0	0	0	0	0	0	0	0	0	0		2	2	0	0	0
1102		1	1	2008	1	0	0	0	0	0	0	0	0	0	0	0	0		2	2	0	0	0
1103		1	1	2008	1	0	0	0	0	0	0	0	0	0	0	0	0		2	2	0	0	0
1104		1	1	2008	1	0	0	0	0	0	0	0	0	0	0	0	0		2	2	0	0	0
1105		1	1	2008	1	0	0	0	0	0	0	0	0	0	0	0	0		2	2	0	0	0
1106		1	1	2008	1	0	0	0	0	0	0	0	0	0	0	0	0		2	2	0	0	0
1107		1	1	2008	1	0	0	0	0	0	0	0	0	0	0	0	0		2	2	0	0	0
1108		1	1	2008	1	0	0	0	0	0	0	0	0	0	0	0	0		2	2	0	0	0
1109		1	1	2008	1	0	0	0	0	0	0	0	0	0	0	0	0		2	2	0	0	0
1110		1	1	2008	1	0	0	0	0	0	0	0	0	0	0	0	0		2	2	0	0	0
1111		1	1	2008	1	0	0	0	0	0	0	0	0	0	0	0	0		2	2	0	0	0
1112		1	1	2008	1	0	0	0	0	0	0	0	0	0	0	0	0		2	2	0	0	0
1113		1	1	2008	1	0	0	0	0	0	0	0	0	0	0	0	0		2	2	0	0	0
1114		1	1	2008	1	0	0	0	0	0	0	0	0	0	0	0	0		2	2	0	0	0
1115		1	1	2008	1	0	0	0	0	0	0	0	0	0	0	0	0		2	2	0	0	0
1116		1	1	2008	1	0	0	0	0	0	0	0	0	0	0	0	0		2	2	0	0	0
1117		1	1	2008	1	0	0	0	0	0	0	0	0	0	0	0	0		2	2	0	0	0
1118		1	1	2008	1	0	0	0	0	0	0	0	0	0	0	0	0		2	2	0	0	0
1119		1	1	2008	1	0	0	0	0	0	0	0	0	0	0	0	0		2	2	0	0	0
1120		1	1	2008	1	0	0	0	0	0	0	0	0	0	0	0	0		2	2	0	0	0
1121		1	1	2008	1	0	0	0	0	0	0	0	0	0	0	0	0		2	2	0	0	0
1122		1	1	2008	1	0	0	0	0	0	0	0	0	0	0	0	0		2	2	0	0	0
1123		1	1	2008	1	0	0	0	0	0	0	0	0	0	0	0	0		2	2	0	0	0
1124		1	1	2008	1	0	0	0	0	0	0	0	0	0	0	0	0		2	2	0	0	0
1125		1	1	2008	1	0	0	0	0	0	0	0	0	0	0	0	0		2	2	0	0	0
1126		1	1	2008	1	0	0	0	0	0	0	0	0	0	0	0	0		2	2	0	0	0
1127		1	1	2008	1	0	0	0	0	0	0	0	0	0	0	0	0		2	2	0	0	0
1128		1	1	2008	1	0	0	0	0	0	0	0	0	0	0	0	0		2	2	0	0	0
1129		1	1	2008	1	0	0	0	0	0	0	0	0	0	0	0	0		2	2	0	0	0
1130		1	1	2008	1	0	0	0	0	0	0	0	0	0	0	0	0		2	2	0	0	0
1131		1	1	2008	1	0	0	0	0	0	0	0	0	0	0	0	0		2	2	0	0	0
1132		1	1	2008	1	0	0	0	0	0	0	0	0	0	0	0	0		2	2	0	0	0
1133		1	1	2008	1	0	0	0	0	0	0	0	0	0	0	0	0		2	2	0	0	0
1134		1	1	2008	1	0	0	0	0	0	0	0	0	0	0	0	0		2	2	0	0	0
1135		1	1	2008	1	0	0	0	0	0	0	0	0	0	0	0	0		2	2	0	0	0
1136		1	1	2008	1	0	0	0	0	0	0	0	0	0	0	0	0		2	2	0	0	0
1137		1	1	2008	1	0	0	0	0	0	0	0	0	0	0	0	0		2	2	0	0	0
1138		1	1	2008	1	0	0	0	0	0	0	0	0	0	0	0	0		2	2	0	0	0
1139		1	1	2008	1	0	0	0	0	0	0	0	0	0	0	0	0		2	2	0	0	0
1140		1	1	2008	1	0	0	0	0	0	0	0	0	0	0	0	0		2	2	0	0	0
1141		1	1	2008	1	0	0	0	0	0	0	0	0	0	0	0	0		2	2	0	0	0
1142		1	1	2008	1	0	0	0	0	0	0	0	0	0	0	0	0		2	2	0	0	0
1143		1	1	2008	1	0	0	0	0	0	0	0	0	0	0	0	0		2	2	0	0	0
1144		1	1	2008	1	0	0	0	0	0	0	0	0	0	0	0	0		2	2	0	0	0
1145		1	1	2008	1	0	0	0	0	0	0	0	0	0	0	0	0		2	2	0	0	0
1146		1	1	2008	1	0	0	0	0	0	0	0	0	0	0	0	0		2	2	0	0	0
1147		1	1	2008	1	0	0	0	0	0	0	0	0	0	0	0	0		2	2	0	0	0
1148		1	1	2008	1	0	0	0	0	0	0	0	0	0	0	0	0		2	2	0	0	0
1149		1	1	2008	1	0	0	0	0	0	0	0	0	0	0	0	0		2	2	0	0	0
1150		1	1	2008	1	0	0	0	0	0	0	0	0	0	0	0	0		2	2	0	0	0
1151		1	1	2008	1	0	0	0	0	0	0	0	0	0	0	0	0		2	2	0	0	0
1152		1	1	2008	1	0	0	0	0	0	0	0	0	0	0	0	0		2	2	0	0	0
1153		1	1	2008	1	0	0	0	0	0	0	0	0	0	0	0	0		2	2	0	0	0
1154		1	1	2008	1	0	0	0	0	0	0	0	0	0	0	0	0		2	2	0	0	0
1155		1	1	2008	1	0	0	0	0	0	0	0	0	0	0	0	0		2	2	0	0	0
1156		1	1	2008	1	0	0	0	0	0	0	0	0	0	0	0	0		2	2	0	0	0
1157		1	1	2008	1	0	0	0	0	0	0	0	0	0	0	0	0		2	2	0	0	0
1158		1	1	2008	1	0	0	0	0	0	0	0	0	0	0	0	0		2	2	0	0	0
1159		1	1	2008	1	0	0	0	0	0	0	0	0	0	0	0	0		2	2	0	0	0
1160		1	1	2008	1	0	0	0	0	0	0	0	0	0	0	0	0		2	2	0	0	0
1161		1	1	2008	1	0	0	0	0	0	0	0	0	0	0	0	0		2	2	0	0	0
1162		1	1	2008	1	0	0	0	0	0	0	0	0	0	0	0	0		2	2	0	0	0
1163		1	1	2008	1	0	0	0	0	0	0	0	0	0	0	0	0		1	2	0	0	0
1164		1	1	2008	1	0	0	0	0	0	0	0	0	0	0	0	0		1	2	0	0	0
1165		1	1	2008	1	0	0	0	0	0	0	0	0	0	0	0	0		1	2	0	0	0
1166		1	1	2008	1	0	0	0	0	0	0	0	0	0	0	0	0		1	2	0	0	0
1167		1	1	2008	1	0	0	0	0	0	0	0	0	0	0	0	0		1	2	0	0	0
1168		1	1	2008	1	0	0	0	0	0	0	0	0	0	0	0	0		1	2	0	0	0
1169		1	1	2008	1	0	0	0	0	0	0	0	0	0	0	0	0		1	2	0	0	0
1170		1	1	2008	1	0	0	0	0	0	0	0	0	0	0	0	0		1	2	0	0	0
1171		1	1	2008	1	0	0	0	0	0	0	0	0	0	0	0	0		1	2	0	0	0
1172		1	1	2008	1	0	0	0	0	0	0	0	0	0	0	0	0		1	2	0	0	0
1173		1	1	2008	1	0	0	0	0	0	0	0	0	0	0	0	0		1	2	0	0	0
1174		1	1	2008	1	0	0	0	0	0	0	0	0	0	0	0	0		1	2	0	0	0
1175		1	1	2008	1	0	0	0	0	0	0	0	0	0	0	0	0		1	2	0	0	0
1176		1	1	2008	1	0	0	0	0	0	0	0	0	0	0	0	0		1	2	0	0	0
1177		1	1	2008	1	0	0	0	0	0	0	0	0	0	0	0	0		1	2	0	0	0
1178		1	1	2008	1	0	0	0	0	0	0	0	0	0	0	0	0		1	2	0	0	0
1179		1	1	2008	1	0	0	0	0	0	0	0	0	0	0	0	0		1	2	0	0	0
1180		1	1	2008	1	0	0	0	0	0	0	0	0	0	0	0	0		1	2	0	0	0
1181		1	1	2008	1	0	0	0	0	0	0	0	0	0	0	0	0		1	2	0	0	0
1182		1	1	2008	1	0	0	0	0	0	0	0	0	0	0	0	0		1	2	0	0	0
1183		1	1	2008	1	0	0	0	0	0	0	0	0	0	0	0	0		1	2	0	0	0
1184		1	1	2008	1	0	0	0	0	0	0	0	0	0	0	0	0		1	2	0	0	0
1185		1	1	2008	1	0	0	0	0	0	0	0	0	0	0	0	0		1	2	0	0	0
1186		1	1	2008	1	0	0	0	0	0	0	0	0	0	0	0	0		1	2	0	0	0
1187		1	1	2008	1	0	0	0	0	0	0	0	0	0	0	0	0		1	2	0	0	0
1188		1	1	2008	1	0	0	0	0	0	0	0	0	0	0	0	0		1	2	0	0	0
1189		1	1	2008	1	0	0	0	0	0	0	0	0	0	0	0	0		1	2	0	0	0
1190		1	1	2008	1	0	0	0	0	0	0	0	0	0	0	0	0		1	2	0	0	0
1191		1	1	2008	1	0	0	0	0	0	0	0	0	0	0	0	0		1	2	0	0	0
1192		1	1	2008	1	0	0	0	0	0	0	0	0	0	0	0	0		1	2	0	0	0
1193		1	1	2008	1	0	0	0	0	0	0	0	0	0	0	0	0		1	2	0	0	0
1194		1	1	2008	1	0	0	0	0	0	0	0	0	0	0	0	0		1	2	0	0	0
1195		1	1	2008	1	0	0	0	0	0	0	0	0	0	0	0	0		1	2	0	0	0
1196		1	1	2008	1	0	0	0	0	0	0	0	0	0	0	0	0		1	2	0	0	0
1197		1	1	2008	1	0	0	0	0	0	0	0	0	0	0	0	0		1	2	0	0	0
1198		1	1	2008	1	0	0	0	0	0	0	0	0	0	0	0	0		1	2	0	0	0
1199		1	1	2008	1	0	0	0	0	0	0	0	0	0	0	0	0		1	2	0	0	0
1200		1	1	2008	1	0	0	0	0	0	0	0	0	0	0	0	0		1	2	0	0	0
1201		1	1	2008	1	0	0	0	0	0	0	0	0	0	0	0	0		1	2	0	0	0
1202		1	1	2008	1	0	0	0	0	0	0	0	0	0	0	0	0		1	2	0	0	0
1203		1	1	2008	1	0	0	0	0	0	0	0	0	0	0	0	0		1	2	0	0	0
1204		1	1	2008	1	0	0	0	0	0	0	0	0	0	0	0	0		1	2	0	0	0
1205		1	1	2008	1	0	0	0	0	0	0	0	0	0	0	0	0		1	2	0	0	0
1206		1	1	2008	1	0	0	0	0	0	0	0	0	0	0	0	0		1	2	0	0	0
1207		1	1	2008	1	0	0	0	0	0	0	0	0	0	0	0	0		1	2	0	0	0
1208		1	1	2008	1	0	0	0	0	0	0	0	0	0	0	0	0		1	2	0	0	0
1209		1	1	2008	1	0	0	0	0	0	0	0	0	0	0	0	0		1	2	0	0	0
1210		1	1	2008	1	0	0	0	0	0	0	0	0	0	0	0	0		1	2	0	0	0
1211		1	1	2008	1	0	0	0	0	0	0	0	0	0	0	0	0		1	2	0	0	0
1212		1	1	2008	1	0	0	0	0	0	0	0	0	0	0	0	0		1	2	0	0	0
1213		1	1	2008	1	0	0	0	0	0	0	0	0	0	0	0	0		1	2	0	0	0
1214		1	1	2008	1	0	0	0	0	0	0	0	0	0	0	0	0		1	2	0	0	0
1215		1	1	2008	1	0	0	0	0	0	0	0	0	0	0	0	0		1	2	0	0	0
1216		1	1	2008	1	0	0	0	0	0	0	0	0	0	0	0	0		1	2	0	0	0
1217		1	1	2008	1	0	0	0	0	0	0	0	0	0	0	0	0		1	2	0	0	0
1218		1	1	2008	1	0	0	0	0	0	0	0	0	0	0	0	0		1	2	0	0	0
1219		1	1	2008	1	0	0	0	0	0	0	0	0	0	0	0	0		1	2	0	0	0
1220		1	1	2008	1	0	0	0	0	0	0	0	0	0	0	0	0		1	2	0	0	0
1221		1	1	2008	1	0	0	0	0	0	0	0	0	0	0	0	0		1	2	0	0	0
1222		1	1	2008	1	0	0	0	0	0	0	0	0	0	0	0	0		1	2	0	0	0
1223		1	1	2008	1	0	0	0	0	0	0	0	0	0	0	0	0		1	2	0	0	0
1224		1	1	2008	1	0	0	0	0	0	0	0	0	0	0	0	0		1	2	0	0	0
1225		1	1	2008	1	0	0	0	0	0	0	0	0	0	0	0	0		1	2	0	0	0
1226		1	1	2008	1	0	0	0	0	0	0	0	0	0	0	0	0		1	2	0	0	0
1227		1	1	2008	1	0	0	0	0	0	0	0	0	0	0	0	0		1	2	0	0	0
1228		1	1	2008	1	0	0	0	0	0	0	0	0	0	0	0	0		1	2	0	0	0
1229		1	1	2008	1	0	0	0	0	0	0	0	0	0	0	0	0		1	2	0	0	0
1230		1	1	2008	1	0	0	0	0	0	0	0	0	0	0	0	0		1	2	0	0	0
1231		1	1	2008	1	0	0	0	0	0	0	0	0	0	0	0	0		1	2	0	0	0
1232		1	1	2008	1	0	0	0	0	0	0	0	0	0	0	0	0		1	2	0	0	0
1233		1	1	2008	1	0	0	0	0	0	0	0	0	0	0	0	0		1	2	0	0	0
1234		1	1	2008	1	0	0	0	0	0	0	0	0	0	0	0	0		1	2	0	0	0
1235		1	1	2008	1	0	0	0	0	0	0	0	0	0	0	0	0		1	2	0	0	0
1236		1	1	2008	1	0	0	0	0	0	0	0	0	0	0	0	0		1	2	0	0	0
1237		1	1	2008	1	0	0	0	0	0	0	0	0	0	0	0	0		1	2	0	0	0
1238		1	1	2008	1	0	0	0	0	0	0	0	0	0	0	0	0		1	2	0	0	0
1239		1	1	2008	1	0	0	0	0	0	0	0	0	0	0	0	0		1	2	0	0	0
1240		1	1	2008	1	0	0	0	0	0	0	0	0	0	0	0	0		1	2	0	0	0
1241		1	1	2008	1	0	0	0	0	0	0	0	0	0	0	0	0		1	2	0	0	0
1242		1	1	2008	1	0	0	0	0	0	0	0	0	0	0	0	0		1	2	0	0	0
1243		1	1	2008	1	0	0	0	0	0	0	0	0	0	0	0	0		1	2	0	0	0
1244		1	1	2008	1	0	0	0	0	0	0	0	0	0	0	0	0		1	2	0	0	0
1245		1	1	2008	1	0	0	0	0	0	0	0	0	0	0	0	0		1	2	0	0	0
1246		1	1	2008	1	0	0	0	0	0	0	0	0	0	0	0	0		1	2	0	0	0
1247		1	1	2008	1	0	0	0	0	0	0	0	0	0	0	0	0		1	2	0	0	0
1248		1	1	2008	1	0	0	0	0	0	0	0	0	0	0	0	0		1	2	0	0	0
1249		1	1	2008	1	0	0	0	0	0	0	0	0	0	0	0	0		1	2	0	0	0
1250		1	1	2008	1	0	0	0	0	0	0	0	0	0	0	0	0		1	2	0	0	0
1251		1	1	2008	1	0	0	0	0	0	0	0	0	0	0	0	0		1	2	0	0	0
1252		1	1	2008	1	0	0	0	0	0	0	0	0	0	0	0	0		1	2	0	0	0
1253		1	1	2008	1	0	0	0	0	0	0	0	0	0	0	0	0		1	2	0	0	0
1254		1	1	2008	1	0	0	0	0	0	0	0	0	0	0	0	0		1	2	0	0	0
1255		1	1	2008	1	0	0	0	0	0	0	0	0	0	0	0	0		1	2	0	0	0
1256		1	1	2008	1	0	0	0	0	0	0	0	0	0	0	0	0		1	2	0	0	0
1257		1	1	2008	1	0	0	0	0	0	0	0	0	0	0	0	0		1	2	0	0	0
1258		1	1	2008	1	0	0	0	0	0	0	0	0	0	0	0	0		1	2	0	0	0
1259		1	1	2008	1	0	0	0	0	0	0	0	0	0	0	0	0		1	2	0	0	0
1260		1	1	2008	1	0	0	0	0	0	0	0	0	0	0	0	0		1	2	0	0	0
1261		1	1	2008	1	0	0	0	0	0	0	0	0	0	0	0	0		1	2	0	0	0
1262		1	1	2008	1	0	0	0	0	0	0	0	0	0	0	0	0		1	2	0	0	0
1263		1	1	2008	1	0	0	0	0	0	0	0	0	0	0	0	0		1	2	0	0	0
1264		1	1	2008	1	0	0	0	0	0	0	0	0	0	0	0	0		1	2	0	0	0
1265		1	1	2008	1	0	0	0	0	0	0	0	0	0	0	0	0		1	2	0	0	0
1266		1	1	2008	1	0	0	0	0	0	0	0	0	0	0	0	0		1	2	0	0	0
1267		1	1	2008	1	0	0	0	0	0	0	0	0	0	0	0	0		1	2	0	0	0
1268		1	1	2008	1	0	0	0	0	0	0	0	0	0	0	0	0		1	2	0	0	0
1269		1	1	2008	1	0	0	0	0	0	0	0	0	0	0	0	0		1	2	0	0	0
1270		1	1	2008	1	0	0	0	0	0	0	0	0	0	0	0	0		1	2	0	0	0
1271		1	1	2008	1	0	0	0	0	0	0	0	0	0	0	0	0		1	2	0	0	0
1272		1	1	2008	1	0	0	0	0	0	0	0	0	0	0	0	0		1	2	0	0	0
1273		1	1	2008	1	0	0	0	0	0	0	0	0	0	0	0	0		1	2	0	0	0
1274		1	1	2008	1	0	0	0	0	0	0	0	0	0	0	0	0		1	2	0	0	0
1275		1	1	2008	1	0	0	0	0	0	0	0	0	0	0	0	0		1	2	0	0	0
1276		1	1	2008	1	0	0	0	0	0	0	0	0	0	0	0	0		1	2	0	0	0
1277		1	1	2008	1	0	0	0	0	0	0	0	0	0	0	0	0		1	2	0	0	0
1278		1	1	2008	1	0	0	0	0	0	0	0	0	0	0	0	0		1	2	0	0	0
1279		1	1	2008	1	0	0	0	0	0	0	0	0	0	0	0	0		1	2	0	0	0
1280		1	1	2008	1	0	0	0	0	0	0	0	0	0	0	0	0		1	2	0	0	0
1281		1	1	2008	1	0	0	0	0	0	0	0	0	0	0	0	0		1	2	0	0	0
1282		1	1	2008	1	0	0	0	0	0	0	0	0	0	0	0	0		1	2	0	0	0
1283		1	1	2008	1	0	0	0	0	0	0	0	0	0	0	0	0		1	2	0	0	0
1284		1	1	2008	1	0	0	0	0	0	0	0	0	0	0	0	0		1	2	0	0	0
1285		1	1	2008	1	0	0	0	0	0	0	0	0	0	0	0	0		1	2	0	0	0
1286		1	1	2008	1	0	0	0	0	0	0	0	0	0	0	0	0		1	2	0	0	0
1287		1	1	2008	1	0	0	0	0	0	0	0	0	0	0	0	0		1	2	0	0	0
1288		1	1	2008	1	0	0	0	0	0	0	0	0	0	0	0	0		1	2	0	0	0
1289		1	1	2008	1	0	0	0	0	0	0	0	0	0	0	0	0		1	2	0	0	0
1290		1	1	2008	1	0	0	0	0	0	0	0	0	0	0	0	0		1	2	0	0	0
1291		1	1	2008	1	0	0	0	0	0	0	0	0	0	0	0	0		1	2	0	0	0
1292		1	1	2008	1	0	0	0	0	0	0	0	0	0	0	0	0		1	2	0	0	0
1293		1	1	2008	1	0	0	0	0	0	0	0	0	0	0	0	0		1	2	0	0	0
1294		1	1	2008	1	0	0	0	0	0	0	0	0	0	0	0	0		1	2	0	0	0
1295		1	1	2008	1	0	0	0	0	0	0	0	0	0	0	0	0		1	2	0	0	0
1296		1	1	2008	1	0	0	0	0	0	0	0	0	0	0	0	0		1	2	0	0	0
1297		1	1	2008	1	0	0	0	0	0	0	0	0	0	0	0	0		1	2	0	0	0
1298		1	1	2008	1	0	0	0	0	0	0	0	0	0	0	0	0		1	2	0	0	0
1299		1	1	2008	1	0	0	0	0	0	0	0	0	0	0	0	0		1	2	0	0	0
1300		1	1	2008	1	0	0	0	0	0	0	0	0	0	0	0	0		1	2	0	0	0
1301		1	1	2008	1	0	0	0	0	0	0	0	0	0	0	0	0		1	2	0	0	0
1302		1	1	2008	1	0	0	0	0	0	0	0	0	0	0	0	0		1	2	0	0	0
1303		1	1	2008	1	0	0	0	0	0	0	0	0	0	0	0	0		1	2	0	0	0
1304		1	1	2008	1	0	0	0	0	0	0	0	0	0	0	0	0		1	2	0	0	0
1305		1	1	2008	1	0	0	0	0	0	0	0	0	0	0	0	0		1	2	0	0	0
1306		1	1	2008	1	0	0	0	0	0	0	0	0	0	0	0	0		1	2	0	0	0
1307		1	1	2008	1	0	0	0	0	0	0	0	0	0	0	0	0		1	2	0	0	0
1308		1	1	2008	1	0	0	0	0	0	0	0	0	0	0	0	0		1	2	0	0	0
1309		1	1	2008	1	0	0	0	0	0	0	0	0	0	0	0	0		1	2	0	0	0
1310		1	1	2008	1	0	0	0	0	0	0	0	0	0	0	0	0		1	2	0	0	0
1311		1	1	2008	1	0	0	0	0	0	0	0	0	0	0	0	0		1	2	0	0	0
1312		1	1	2008	1	0	0	0	0	0	0	0	0	0	0	0	0		1	2	0	0	0
1313		1	1	2008	1	0	0	0	0	0	0	0	0	0	0	0	0		1	2	0	0	0
1314		1	1	2008	1	0	0	0	0	0	0	0	0	0	0	0	0		1	2	0	0	0
1315		1	1	2008	1	0	0	0	0	0	0	0	0	0	0	0	0		1	2	0	0	0
1316		1	1	2008	1	0	0	0	0	0	0	0	0	0	0	0	0		1	2	0	0	0
1317		1	1	2008	1	0	0	0	0	0	0	0	0	0	0	0	0		1	2	0	0	0
1318		1	1	2008	1	0	0	0	0	0	0	0	0	0	0	0	0		1	2	0	0	0
1319		1	1	2008	1	0	0	0	0	0	0	0	0	0	0	0	0		1	2	0	0	0
1320		1	1	2008	1	0	0	0	0	0	0	0	0	0	0	0	0		1	2	0	0	0
1321		1	1	2008	1	0	0	0	0	0	0	0	0	0	0	0	0		1	2	0	0	0
1322		1	1	2008	1	0	0	0	0	0	0	0	0	0	0	0	0		1	2	0	0	0
1323		1	1	2008	1	0	0	0	0	0	0	0	0	0	0	0	0		1	2	0	0	0
1324		1	1	2008	1	0	0	0	0	0	0	0	0	0	0	0	0		1	2	0	0	0
1325		1	1	2008	1	0	0	0	0	0	0	0	0	0	0	0	0		1	2	0	0	0
1326		1	1	2008	1	0	0	0	0	0	0	0	0	0	0	0	0		1	2	0	0	0
1327		1	1	2008	1	0	0	0	0	0	0	0	0	0	0	0	0		1	2	0	0	0
1328		1	1	2008	1	0	0	0	0	0	0	0	0	0	0	0	0		1	2	0	0	0
1329		1	1	2008	1	0	0	0	0	0	0	0	0	0	0	0	0		1	2	0	0	0
1330		1	1	2008	1	0	0	0	0	0	0	0	0	0	0	0	0		1	2	0	0	0
1331		1	1	2008	1	0	0	0	0	0	0	0	0	0	0	0	0		1	2	0	0	0
1332		1	1	2008	1	0	0	0	0	0	0	0	0	0	0	0	0		1	2	0	0	0
1333		1	1	2008	1	0	0	0	0	0	0	0	0	0	0	0	0		1	2	0	0	0
1334		1	1	2008	1	0	0	0	0	0	0	0	0	0	0	0	0		1	2	0	0	0
1335		1	1	2008	1	0	0	0	0	0	0	0	0	0	0	0	0		1	2	0	0	0
1336		1	1	2008	1	0	0	0	0	0	0	0	0	0	0	0	0		1	2	0	0	0
1337		1	1	2008	1	0	0	0	0	0	0	0	0	0	0	0	0		1	2	0	0	0
1338		1	1	2008	1	0	0	0	0	0	0	0	0	0	0	0	0		1	2	0	0	0
1339		1	1	2008	1	0	0	0	0	0	0	0	0	0	0	0	0		1	2	0	0	0
1340		1	1	2008	1	0	0	0	0	0	0	0	0	0	0	0	0		1	2	0	0	0
1341		1	1	2008	1	0	0	0	0	0	0	0	0	0	0	0	0		1	2	0	0	0
1342		1	1	2008	1	0	0	0	0	0	0	0	0	0	0	0	0		1	2	0	0	0
1343		1	1	2008	1	0	0	0	0	0	0	0	0	0	0	0	0		1	2	0	0	0
1344		1	1	2008	1	0	0	0	0	0	0	0	0	0	0	0	0		1	2	0	0	0
1345		1	1	2008	1	0	0	0	0	0	0	0	0	0	0	0	0		1	2	0	0	0
1346		1	1	2008	1	0	0	0	0	0	0	0	0	0	0	0	0		1	2	0	0	0
1347		1	1	2008	1	0	0	0	0	0	0	0	0	0	0	0	0		1	2	0	0	0
1348		1	1	2008	1	0	0	0	0	0	0	0	0	0	0	0	0		1	2	0	0	0
1349		1	1	2008	1	0	0	0	0	0	0	0	0	0	0	0	0		1	2	0	0	0
1350		1	1	2008	1	0	0	0	0	0	0	0	0	0	0	0	0		1	2	0	0	0
1351		1	1	2008	1	0	0	0	0	0	0	0	0	0	0	0	0		1	2	0	0	0
1352		1	1	2008	1	0	0	0	0	0	0	0	0	0	0	0	0		1	2	0	0	0
1353		1	1	2008	1	0	0	0	0	0	0	0	0	0	0	0	0		1	2	0	0	0
1354		1	1	2008	1	0	0	0	0	0	0	0	0	0	0	0	0		1	2	0	0	0
1355		1	1	2008	1	0	0	0	0	0	0	0	0	0	0	0	0		1	2	0	0	0
1356		1	1	2008	1	0	0	0	0	0	0	0	0	0	0	0	0		1	2	0	0	0
1357		1	1	2008	1	0	0	0	0	0	0	0	0	0	0	0	0		1	2	0	0	0
1358		1	1	2008	1	0	0	0	0	0	0	0	0	0	0	0	0		1	2	0	0	0
1359		1	1	2008	1	0	0	0	0	0	0	0	0	0	0	0	0		1	2	0	0	0
1360		1	1	2008	1	0	0	0	0	0	0	0	0	0	0	0	0		1	2	0	0	0
1361		1	1	2008	1	0	0	0	0	0	0	0	0	0	0	0	0		1	2	0	0	0
1362		1	1	2008	1	0	0	0	0	0	0	0	0	0	0	0	0		1	2	0	0	0
1363		1	1	2008	1	0	0	0	0	0	0	0	0	0	0	0	0		1	2	0	0	0
1364		1	1	2008	1	0	0	0	0	0	0	0	0	0	0	0	0		1	2	0	0	0
1365		1	1	2008	1	0	0	0	0	0	0	0	0	0	0	0	0		1	2	0	0	0
1366		1	1	2008	1	0	0	0	0	0	0	0	0	0	0	0	0		1	2	0	0	0
1367		1	1	2008	1	0	0	0	0	0	0	0	0	0	0	0	0		1	2	0	0	0
1368		1	1	2008	1	0	0	0	0	0	0	0	0	0	0	0	0		1	2	0	0	0
1369		1	1	2008	1	0	0	0	0	0	0	0	0	0	0	0	0		1	2	0	0	0
1370		1	1	2008	1	0	0	0	0	0	0	0	0	0	0	0	0		1	2	0	0	0
1371		1	1	2008	1	0	0	0	0	0	0	0	0	0	0	0	0		1	2	0	0	0
1372		1	1	2008	1	0	0	0	0	0	0	0	0	0	0	0	0		1	2	0	0	0
1373		1	1	2008	1	0	0	0	0	0	0	0	0	0	0	0	0		1	2	0	0	0
1374		1	1	2008	1	0	0	0	0	0	0	0	0	0	0	0	0		1	2	0	0	0
1375		1	1	2008	1	0	0	0	0	0	0	0	0	0	0	0	0		1	2	0	0	0
1376		1	1	2008	1	0	0	0	0	0	0	0	0	0	0	0	0		1	2	0	0	0
1377		1	1	2008	1	0	0	0	0	0	0	0	0	0	0	0	0		1	2	0	0	0
1378		1	1	2008	1	0	0	0	0	0	0	0	0	0	0	0	0		1	2	0	0	0
1379		1	1	2008	1	0	0	0	0	0	0	0	0	0	0	0	0		1	2	0	0	0
1380		1	1	2008	1	0	0	0	0	0	0	0	0	0	0	0	0		1	2	0	0	0
1381		1	1	2008	1	0	0	0	0	0	0	0	0	0	0	0	0		1	2	0	0	0
1382		1	1	2008	1	0	0	0	0	0	0	0	0	0	0	0	0		1	2	0	0	0
1383		1	1	2008	1	0	0	0	0	0	0	0	0	0	0	0	0		1	2	0	0	0
1384		1	1	2008	1	0	0	0	0	0	0	0	0	0	0	0	0		1	2	0	0	0
1385		1	1	2008	1	0	0	0	0	0	0	0	0	0	0	0	0		1	2	0	0	0
1386		1	1	2008	1	0	0	0	0	0	0	0	0	0	0	0	0		1	2	0	0	0
1387		1	1	2008	1	0	0	0	0	0	0	0	0	0	0	0	0		1	2	0	0	0
1388		1	1	2008	1	0	0	0	0	0	0	0	0	0	0	0	0		1	2	0	0	0
1389		1	1	2008	1	0	0	0	0	0	0	0	0	0	0	0	0		1	2	0	0	0
1390		1	1	2008	1	0	0	0	0	0	0	0	0	0	0	0	0		1	2	0	0	0
1391		1	1	2008	1	0	0	0	0	0	0	0	0	0	0	0	0		1	2	0	0	0
1392		1	1	2008	1	0	0	0	0	0	0	0	0	0	0	0	0		1	2	0	0	0
1393		1	1	2008	1	0	0	0	0	0	0	0	0	0	0	0	0		1	2	0	0	0
1394		1	1	2008	1	0	0	0	0	0	0	0	0	0	0	0	0		1	2	0	0	0
1395		1	1	2008	1	0	0	0	0	0	0	0	0	0	0	0	0		1	2	0	0	0
1396		1	1	2008	1	0	0	0	0	0	0	0	0	0	0	0	0		1	2	0	0	0
1397		1	1	2008	1	0	0	0	0	0	0	0	0	0	0	0	0		1	2	0	0	0
1398		1	1	2008	1	0	0	0	0	0	0	0	0	0	0	0	0		1	2	0	0	0
1399		1	1	2008	1	0	0	0	0	0	0	0	0	0	0	0	0		1	2	0	0	0
1400		1	1	2008	1	0	0	0	0	0	0	0	0	0	0	0	0		1	2	0	0	0
1401		1	1	2008	1	0	0	0	0	0	0	0	0	0	0	0	0		1	2	0	0	0
1402		1	1	2008	1	0	0	0	0	0	0	0	0	0	0	0	0		1	2	0	0	0
1403		1	1	2008	1	0	0	0	0	0	0	0	0	0	0	0	0		1	2	0	0	0
1404		1	1	2008	1	0	0	0	0	0	0	0	0	0	0	0	0		1	2	0	0	0
1405		1	1	2008	1	0	0	0	0	0	0	0	0	0	0	0	0		1	2	0	0	0
1406		1	1	2008	1	0	0	0	0	0	0	0	0	0	0	0	0		1	2	0	0	0
1407		1	1	2008	1	0	0	0	0	0	0	0	0	0	0	0	0		1	2	0	0	0
1408		1	1	2008	1	0	0	0	0	0	0	0	0	0	0	0	0		1	2	0	0	0
1409		1	1	2008	1	0	0	0	0	0	0	0	0	0	0	0	0		1	2	0	0	0
1410		1	1	2008	1	0	0	0	0	0	0	0	0	0	0	0	0		1	2	0	0	0
1411		1	1	2008	1	0	0	0	0	0	0	0	0	0	0	0	0		1	2	0	0	0
1412		1	1	2008	1	0	0	0	0	0	0	0	0	0	0	0	0		1	2	0	0	0
1413		1	1	2008	1	0	0	0	0	0	0	0	0	0	0	0	0		1	2	0	0	0
1414		1	1	2008	1	0	0	0	0	0	0	0	0	0	0	0	0		1	2	0	0	0
1415		1	1	2008	1	0	0	0	0	0	0	0	0	0	0	0	0		1	2	0	0	0
1416		1	1	2008	1	0	0	0	0	0	0	0	0	0	0	0	0		1	2	0	0	0
1417		1	1	2008	1	0	0	0	0	0	0	0	0	0	0	0	0		1	2	0	0	0
1418		1	1	2008	1	0	0	0	0	0	0	0	0	0	0	0	0		1	2	0	0	0
1419		1	1	2008	1	0	0	0	0	0	0	0	0	0	0	0	0		1	2	0	0	0
1420		1	1	2008	1	0	0	0	0	0	0	0	0	0	0	0	0		1	2	0	0	0
1421		1	1	2008	1	0	0	0	0	0	0	0	0	0	0	0	0		1	2	0	0	0
1422		1	1	2008	1	0	0	0	0	0	0	0	0	0	0	0	0		1	2	0	0	0
1423		1	1	2008	1	0	0	0	0	0	0	0	0	0	0	0	0		1	2	0	0	0
1424		1	1	2008	1	0	0	0	0	0	0	0	0	0	0	0	0		1	2	0	0	0
1425		1	1	2008	1	0	0	0	0	0	0	0	0	0	0	0	0		1	2	0	0	0
1426		1	1	2008	1	0	0	0	0	0	0	0	0	0	0	0	0		1	2	0	0	0
1427		1	1	2008	1	0	0	0	0	0	0	0	0	0	0	0	0		1	2	0	0	0
1428		1	1	2008	1	0	0	0	0	0	0	0	0	0	0	0	0		1	2	0	0	0
1429		1	1	2008	1	0	0	0	0	0	0	0	0	0	0	0	0		1	2	0	0	0
1430		1	1	2008	1	0	0	0	0	0	0	0	0	0	0	0	0		1	2	0	0	0
1431		1	1	2008	1	0	0	0	0	0	0	0	0	0	0	0	0		1	2	0	0	0
1432		1	1	2008	1	0	0	0	0	0	0	0	0	0	0	0	0		1	2	0	0	0
1433		1	1	2008	1	0	0	0	0	0	0	0	0	0	0	0	0		1	2	0	0	0
1434		1	1	2008	1	0	0	0	0	0	0	0	0	0	0	0	0		1	2	0	0	0
1435		1	1	2008	1	0	0	0	0	0	0	0	0	0	0	0	0		1	2	0	0	0
1436		1	1	2008	1	0	0	0	0	0	0	0	0	0	0	0	0		1	2	0	0	0
1437		1	1	2008	1	0	0	0	0	0	0	0	0	0	0	0	0		1	2	0	0	0
1438		1	1	2008	1	0	0	0	0	0	0	0	0	0	0	0	0		1	2	0	0	0
1439		1	1	2008	1	0	0	0	0	0	0	0	0	0	0	0	0		1	2	0	0	0
1440		1	1	2008	1	0	0	0	0	0	0	0	0	0	0	0	0		1	2	0	0	0
1441		1	1	2008	1	0	0	0	0	0	0	0	0	0	0	0	0		1	2	0	0	0
1442		1	1	2008	1	0	0	0	0	0	0	0	0	0	0	0	0		1	2	0	0	0
1443		1	1	2008	1	0	0	0	0	0	0	0	0	0	0	0	0		1	2	0	0	0
1444		1	1	2008	1	0	0	0	0	0	0	0	0	0	0	0	0		1	2	0	0	0
1445		1	1	2008	1	0	0	0	0	0	0	0	0	0	0	0	0		1	2	0	0	0
1446		1	1	2008	1	0	0	0	0	0	0	0	0	0	0	0	0		1	2	0	0	0
1447		1	1	2008	1	0	0	0	0	0	0	0	0	0	0	0	0		1	2	0	0	0
1448		1	1	2008	1	0	0	0	0	0	0	0	0	0	0	0	0		1	2	0	0	0
1449		1	1	2008	1	0	0	0	0	0	0	0	0	0	0	0	0		1	2	0	0	0
1450		1	1	2008	1	0	0	0	0	0	0	0	0	0	0	0	0		1	2	0	0	0
1451		1	1	2008	1	0	0	0	0	0	0	0	0	0	0	0	0		1	2	0	0	0
1452		1	1	2008	1	0	0	0	0	0	0	0	0	0	0	0	0		1	2	0	0	0
1453		1	1	2008	1	0	0	0	0	0	0	0	0	0	0	0	0		1	2	0	0	0
1454		1	1	2008	1	0	0	0	0	0	0	0	0	0	0	0	0		1	2	0	0	0
1455		1	1	2008	1	0	0	0	0	0	0	0	0	0	0	0	0		1	2	0	0	0
1456		1	1	2008	1	0	0	0	0	0	0	0	0	0	0	0	0		1	2	0	0	0
1457		1	1	2008	1	0	0	0	0	0	0	0	0	0	0	0	0		1	2	0	0	0
1458		1	1	2008	1	0	0	0	0	0	0	0	0	0	0	0	0		1	2	0	0	0
1459		1	1	2008	1	0	0	0	0	0	0	0	0	0	0	0	0		1	2	0	0	0
1460		1	1	2008	1	0	0	0	0	0	0	0	0	0	0	0	0		1	2	0	0	0
1461		1	2	2008	1	0	0	0	0	0	0	0	0	0	0	0	0		2	2	0	0	0
1462		1	2	2008	1	0	0	0	0	0	0	0	0	0	0	0	0		2	2	0	0	0
1463		1	2	2008	1	0	0	0	0	0	0	0	0	0	0	0	0		2	2	0	0	0
1464		1	2	2008	1	0	0	0	0	0	0	0	0	0	0	0	0		2	2	0	0	0
1465		1	2	2008	1	0	0	0	0	0	0	0	0	0	0	0	0		2	2	0	0	0
1466		1	2	2008	1	0	0	0	0	0	0	0	0	0	0	0	0		2	2	0	0	0
1467		1	2	2008	1	0	0	0	0	0	0	0	0	0	0	0	0		2	2	0	0	0
1468		1	2	2008	1	0	0	0	0	0	0	0	0	0	0	0	0		2	2	0	0	0
1469		1	2	2008	1	0	0	0	0	0	0	0	0	0	0	0	0		2	2	0	0	0
1470		1	2	2008	1	0	0	0	0	0	0	0	0	0	0	0	0		2	2	0	0	0
1471		1	2	2008	1	0	0	0	0	0	0	0	0	0	0	0	0		2	2	0	0	0
1472		1	2	2008	1	0	0	0	0	0	0	0	0	0	0	0	0		2	2	0	0	0
1473		1	2	2008	1	0	0	0	0	0	0	0	0	0	0	0	0		2	2	0	0	0
1474		1	2	2008	1	0	0	0	0	0	0	0	0	0	0	0	0		2	2	0	0	0
1475		1	2	2008	1	0	0	0	0	0	0	0	0	0	0	0	0		2	2	0	0	0
1476		1	2	2008	1	0	0	0	0	0	0	0	0	0	0	0	0		2	2	0	0	0
1477		1	2	2008	1	0	0	0	0	0	0	0	0	0	0	0	0		2	2	0	0	0
1478		1	2	2008	1	0	0	0	0	0	0	0	0	0	0	0	0		2	2	0	0	0
1479		1	2	2008	1	0	0	0	0	0	0	0	0	0	0	0	0		2	2	0	0	0
1480		1	2	2008	1	0	0	0	0	0	0	0	0	0	0	0	0		2	2	0	0	0
1481		1	2	2008	1	0	0	0	0	0	0	0	0	0	0	0	0		2	2	0	0	0
1482		1	2	2008	1	0	0	0	0	0	0	0	0	0	0	0	0		2	2	0	0	0
1483		1	2	2008	1	0	0	0	0	0	0	0	0	0	0	0	0		2	2	0	0	0
1484		1	2	2008	1	0	0	0	0	0	0	0	0	0	0	0	0		2	2	0	0	0
1485		1	2	2008	1	0	0	0	0	0	0	0	0	0	0	0	0		2	2	0	0	0
1486		1	2	2008	1	0	0	0	0	0	0	0	0	0	0	0	0		2	2	0	0	0
1487		1	2	2008	1	0	0	0	0	0	0	0	0	0	0	0	0		2	2	0	0	0
1488		1	2	2008	1	0	0	0	0	0	0	0	0	0	0	0	0		2	2	0	0	0
1489		1	2	2008	1	0	0	0	0	0	0	0	0	0	0	0	0		2	2	0	0	0
1490		1	2	2008	1	0	0	0	0	0	0	0	0	0	0	0	0		2	2	0	0	0
1491		1	2	2008	1	0	0	0	0	0	0	0	0	0	0	0	0		2	2	0	0	0
1492		1	2	2008	1	0	0	0	0	0	0	0	0	0	0	0	0		2	2	0	0	0
1493		1	2	2008	1	0	0	0	0	0	0	0	0	0	0	0	0		2	2	0	0	0
1494		1	2	2008	1	0	0	0	0	0	0	0	0	0	0	0	0		2	2	0	0	0
1495		1	2	2008	1	0	0	0	0	0	0	0	0	0	0	0	0		2	2	0	0	0
1496		1	2	2008	1	0	0	0	0	0	0	0	0	0	0	0	0		2	2	0	0	0
1497		1	2	2008	1	0	0	0	0	0	0	0	0	0	0	0	0		2	2	0	0	0
1498		1	2	2008	1	0	0	0	0	0	0	0	0	0	0	0	0		2	2	0	0	0
1499		1	2	2008	1	0	0	0	0	0	0	0	0	0	0	0	0		2	2	0	0	0
1500		1	2	2008	1	0	0	0	0	0	0	0	0	0	0	0	0		2	2	0	0	0
1501		1	2	2008	1	0	0	0	0	0	0	0	0	0	0	0	0		2	2	0	0	0
1502		1	2	2008	1	0	0	0	0	0	0	0	0	0	0	0	0		1	2	0	0	0
1503		1	2	2008	1	0	0	0	0	0	0	0	0	0	0	0	0		1	2	0	0	0
1504		1	2	2008	1	0	0	0	0	0	0	0	0	0	0	0	0		1	2	0	0	0
1505		1	2	2008	1	0	0	0	0	0	0	0	0	0	0	0	0		1	2	0	0	0
1506		1	2	2008	1	0	0	0	0	0	0	0	0	0	0	0	0		1	2	0	0	0
1507		1	2	2008	1	0	0	0	0	0	0	0	0	0	0	0	0		1	2	0	0	0
1508		1	2	2008	1	0	0	0	0	0	0	0	0	0	0	0	0		1	2	0	0	0
1509		1	2	2008	1	0	0	0	0	0	0	0	0	0	0	0	0		1	2	0	0	0
1510		1	2	2008	1	0	0	0	0	0	0	0	0	0	0	0	0		1	2	0	0	0
1511		1	2	2008	1	0	0	0	0	0	0	0	0	0	0	0	0		1	2	0	0	0
1512		1	2	2008	1	0	0	0	0	0	0	0	0	0	0	0	0		1	2	0	0	0
1513		1	2	2008	1	0	0	0	0	0	0	0	0	0	0	0	0		1	2	0	0	0
1514		1	2	2008	1	0	0	0	0	0	0	0	0	0	0	0	0		1	2	0	0	0
1515		1	2	2008	1	0	0	0	0	0	0	0	0	0	0	0	0		1	2	0	0	0
1516		1	2	2008	1	0	0	0	0	0	0	0	0	0	0	0	0		1	2	0	0	0
1517		1	2	2008	1	0	0	0	0	0	0	0	0	0	0	0	0		1	2	0	0	0
1518		1	2	2008	1	0	0	0	0	0	0	0	0	0	0	0	0		1	2	0	0	0
1519		1	2	2008	1	0	0	0	0	0	0	0	0	0	0	0	0		1	2	0	0	0
1520		1	2	2008	1	0	0	0	0	0	0	0	0	0	0	0	0		1	2	0	0	0
1521		1	2	2008	1	0	0	0	0	0	0	0	0	0	0	0	0		1	2	0	0	0
1522		1	2	2008	1	0	0	0	0	0	0	0	0	0	0	0	0		1	2	0	0	0
1523		1	2	2008	1	0	0	0	0	0	0	0	0	0	0	0	0		1	2	0	0	0
1524		1	2	2008	1	0	0	0	0	0	0	0	0	0	0	0	0		1	2	0	0	0
1525		1	2	2008	1	0	0	0	0	0	0	0	0	0	0	0	0		1	2	0	0	0
1526		1	2	2008	1	0	0	0	0	0	0	0	0	0	0	0	0		1	2	0	0	0
1527		1	2	2008	1	0	0	0	0	0	0	0	0	0	0	0	0		1	2	0	0	0
1528		1	2	2008	1	0	0	0	0	0	0	0	0	0	0	0	0		1	2	0	0	0
1529		1	2	2008	1	0	0	0	0	0	0	0	0	0	0	0	0		1	2	0	0	0
1530		1	2	2008	1	0	0	0	0	0	0	0	0	0	0	0	0		1	2	0	0	0
1531		1	2	2008	1	0	0	0	0	0	0	0	0	0	0	0	0		1	2	0	0	0
1532		1	2	2008	1	0	0	0	0	0	0	0	0	0	0	0	0		1	2	0	0	0
1533		1	2	2008	1	0	0	0	0	0	0	0	0	0	0	0	0		1	2	0	0	0
1534		1	2	2008	1	0	0	0	0	0	0	0	0	0	0	0	0		1	2	0	0	0
1535		1	2	2008	1	0	0	0	0	0	0	0	0	0	0	0	0		1	2	0	0	0
1536		1	2	2008	1	0	0	0	0	0	0	0	0	0	0	0	0		1	2	0	0	0
1537		1	2	2008	1	0	0	0	0	0	0	0	0	0	0	0	0		1	2	0	0	0
1538		1	2	2008	1	0	0	0	0	0	0	0	0	0	0	0	0		1	2	0	0	0
1539		1	2	2008	1	0	0	0	0	0	0	0	0	0	0	0	0		1	2	0	0	0
1540		1	2	2008	1	0	0	0	0	0	0	0	0	0	0	0	0		1	2	0	0	0
1541		1	2	2008	1	0	0	0	0	0	0	0	0	0	0	0	0		1	2	0	0	0
1542		1	2	2008	1	0	0	0	0	0	0	0	0	0	0	0	0		1	2	0	0	0
1543		1	2	2008	1	0	0	0	0	0	0	0	0	0	0	0	0		1	2	0	0	0
1544		1	2	2008	1	0	0	0	0	0	0	0	0	0	0	0	0		1	2	0	0	0
1545		1	2	2008	1	0	0	0	0	0	0	0	0	0	0	0	0		1	2	0	0	0
1546		1	2	2008	1	0	0	0	0	0	0	0	0	0	0	0	0		1	2	0	0	0
1547		1	2	2008	1	0	0	0	0	0	0	0	0	0	0	0	0		1	2	0	0	0
1548		1	2	2008	1	0	0	0	0	0	0	0	0	0	0	0	0		1	2	0	0	0
1549		1	2	2008	1	0	0	0	0	0	0	0	0	0	0	0	0		1	2	0	0	0
1550		1	2	2008	1	0	0	0	0	0	0	0	0	0	0	0	0		1	2	0	0	0
1551		1	3	2008	1	0	1	0	0	0	0	0	0	0	0	1	1	1	2	2	0	0	1
1552		1	3	2008	1	0	1	0	0	0	0	0	0	0	0	1	1	1	2	2	0	0	1
1553		1	3	2008	1	0	0	0	0	0	0	0	0	0	0	0	0		1	2	0	0	0
1554		1	3	2008	1	0	0	0	0	0	0	0	0	0	0	0	0		1	2	0	0	0
1555		1	3	2008	1	0	0	0	0	0	0	0	0	0	0	0	0		1	2	0	0	0
1556		1	3	2008	1	0	0	0	0	0	0	0	0	0	0	0	0		1	2	0	0	0
1557		1	3	2008	1	0	0	0	0	0	0	0	0	0	0	0	0		1	2	0	0	0
1558		1	3	2008	1	0	0	0	0	0	0	0	0	0	0	0	0		1	2	0	0	0
1559		1	3	2008	1	0	0	0	0	0	0	0	0	0	0	0	0		1	2	0	0	0
1560		1	3	2008	1	0	0	0	0	0	0	0	0	0	0	0	0		1	2	0	0	0
1561		1	3	2008	1	0	0	0	0	0	0	0	0	0	0	0	0		1	2	0	0	0
1562		1	3	2008	1	0	0	0	0	0	0	0	0	0	0	0	0		1	2	0	0	0
1563		1	3	2008	1	0	0	0	0	0	0	0	0	0	0	0	0		1	2	0	0	0
1564		1	3	2008	1	0	0	0	0	0	0	0	0	0	0	0	0		1	2	0	0	0
1565		1	3	2008	1	0	0	0	0	0	0	0	0	0	0	0	0		1	2	0	0	0
1566		1	3	2008	1	0	0	0	0	0	0	0	0	0	0	0	0		1	2	0	0	0
1567		1	3	2008	1	0	0	0	0	0	0	0	0	0	0	0	0		1	2	0	0	0
1568		1	3	2008	1	0	0	0	0	0	0	0	0	0	0	0	0		2	2	0	0	0
1569		1	3	2008	1	0	0	0	0	0	0	0	0	0	0	0	0		2	2	0	0	0
1570		1	3	2008	1	0	0	0	0	0	0	0	0	0	0	0	0		2	2	0	0	0
1571		1	3	2008	1	0	0	0	0	0	0	0	0	0	0	0	0		2	2	0	0	0
1572		1	3	2008	1	0	0	0	0	0	0	0	0	0	0	0	0		2	2	0	0	0
1573		1	3	2008	1	0	0	0	0	0	0	0	0	0	0	0	0		2	2	0	0	0
1574		1	3	2008	1	0	0	0	0	0	0	0	0	0	0	0	0		2	2	0	0	0
1575		1	3	2008	1	0	0	0	0	0	0	0	0	0	0	0	0		2	2	0	0	0
1576		1	3	2008	1	0	0	0	0	0	0	0	0	0	0	0	0		2	2	0	0	0
1577		1	3	2008	1	0	0	0	0	0	0	0	0	0	0	0	0		2	2	0	0	0
1578		1	3	2008	1	0	0	0	0	0	0	0	0	0	0	0	0		2	2	0	0	0
1579		1	3	2008	1	0	0	0	0	0	0	0	0	0	0	0	0		2	2	0	0	0
1580		1	3	2008	1	0	0	0	0	0	0	0	0	0	0	0	0		2	2	0	0	0
1581		1	3	2008	1	0	0	0	0	0	0	0	0	0	0	0	0		2	2	0	0	0
1582		1	3	2008	1	0	0	0	0	0	0	0	0	0	0	0	0		2	2	0	0	0
1583		1	3	2008	1	0	0	0	0	0	0	0	0	0	0	0	0		2	2	0	0	0
1584		1	3	2008	1	0	0	0	0	0	0	0	0	0	0	0	0		2	2	0	0	0
1585		1	3	2008	1	0	0	0	0	0	0	0	0	0	0	0	0		2	2	0	0	0
1586		1	3	2008	1	0	0	0	0	0	0	0	0	0	0	0	0		2	2	0	0	0
1587		1	3	2008	1	0	0	0	0	0	0	0	0	0	0	0	0		2	2	0	0	0
1588		1	3	2008	1	0	0	0	0	0	0	0	0	0	0	0	0		2	2	0	0	0
1589		1	3	2008	1	0	0	0	0	0	0	0	0	0	0	0	0		2	2	0	0	0
1590		1	3	2008	1	0	0	0	0	0	0	0	0	0	0	0	0		2	2	0	0	0
1591		1	3	2008	1	0	0	0	0	0	0	0	0	0	0	0	0		2	2	0	0	0
1592		1	3	2008	1	0	0	0	0	0	0	0	0	0	0	0	0		2	2	0	0	0
1593		1	3	2008	1	0	0	0	0	0	0	0	0	0	0	0	0		2	2	0	0	0
1594		1	3	2008	1	0	0	0	0	0	0	0	0	0	0	0	0		2	2	0	0	0
1595		1	3	2008	1	0	0	0	0	0	0	0	0	0	0	0	0		2	2	0	0	0
1596		1	3	2008	1	0	0	0	0	0	0	0	0	0	0	0	0		2	2	0	0	0
1597		1	3	2008	1	0	0	0	0	0	0	0	0	0	0	0	0		2	2	0	0	0
1598		1	3	2008	1	0	0	0	0	0	0	0	0	0	0	0	0		2	2	0	0	0
1599		1	3	2008	1	0	0	0	0	0	0	0	0	0	0	0	0		2	2	0	0	0
1600		1	3	2008	1	0	0	0	0	0	0	0	0	0	0	0	0		2	2	0	0	0
1601		1	3	2008	1	0	0	0	0	0	0	0	0	0	0	0	0		2	2	0	0	0
1602		1	3	2008	1	0	0	0	0	0	0	0	0	0	0	0	0		2	2	0	0	0
1603		1	3	2008	1	0	0	0	0	0	0	0	0	0	0	0	0		2	2	0	0	0
1604		1	3	2008	1	0	0	0	0	0	0	0	0	0	0	0	0		2	2	0	0	0
1605		1	3	2008	1	0	0	0	0	0	0	0	0	0	0	0	0		2	2	0	0	0
1606		1	3	2008	1	0	0	0	0	0	0	0	0	0	0	0	0		2	2	0	0	0
1607		1	3	2008	1	0	0	0	0	0	0	0	0	0	0	0	0		2	2	0	0	0
1608		1	3	2008	1	0	0	0	0	0	0	0	0	0	0	0	0		2	2	0	0	0
1609		1	3	2008	1	0	0	0	0	0	0	0	0	0	0	0	0		2	2	0	0	0
1610		1	3	2008	1	0	0	0	0	0	0	0	0	0	0	0	0		2	2	0	0	0
1611		1	3	2008	1	0	0	0	0	0	0	0	0	0	0	0	0		2	2	0	0	0
1612		1	4	2008	1	0	1	0	0	0	0	0	0	0	0	1	1	1	1	2	0	0	1
1613		1	4	2008	1	0	0	0	0	0	0	0	0	0	0	0	0		1	2	0	0	0
1614		1	4	2008	1	0	0	0	0	0	0	0	0	0	0	0	0		1	2	0	0	0
1615		1	4	2008	1	0	0	0	0	0	0	0	0	0	0	0	0		1	2	0	0	0
1616		1	4	2008	1	0	0	0	0	0	0	0	0	0	0	0	0		1	2	0	0	0
1617		1	4	2008	1	0	0	0	0	0	0	0	0	0	0	0	0		1	2	0	0	0
1618		1	4	2008	1	0	0	0	0	0	0	0	0	0	0	0	0		1	2	0	0	0
1619		1	4	2008	1	0	0	0	0	0	0	0	0	0	0	0	0		1	2	0	0	0
1620		1	4	2008	1	0	0	0	0	0	0	0	0	0	0	0	0		1	2	0	0	0
1621		1	4	2008	1	0	0	0	0	0	0	0	0	0	0	0	0		1	2	0	0	0
1622		1	4	2008	1	0	0	0	0	0	0	0	0	0	0	0	0		1	2	0	0	0
1623		1	4	2008	1	0	0	0	0	0	0	0	0	0	0	0	0		1	2	0	0	0
1624		1	4	2008	1	0	0	0	0	0	0	0	0	0	0	0	0		1	2	0	0	0
1625		1	4	2008	1	0	0	0	0	0	0	0	0	0	0	0	0		1	2	0	0	0
1626		1	4	2008	1	0	0	0	0	0	0	0	0	0	0	0	0		1	2	0	0	0
1627		1	4	2008	1	0	0	0	0	0	0	0	0	0	0	0	0		1	2	0	0	0
1628		1	4	2008	1	0	0	0	0	0	0	0	0	0	0	0	0		1	2	0	0	0
1629		1	4	2008	1	0	0	0	0	0	0	0	0	0	0	0	0		1	2	0	0	0
1630		1	4	2008	1	0	0	0	0	0	0	0	0	0	0	0	0		1	2	0	0	0
1631		1	4	2008	1	0	0	0	0	0	0	0	0	0	0	0	0		1	2	0	0	0
1632		1	4	2008	1	0	0	0	0	0	0	0	0	0	0	0	0		1	2	0	0	0
1633		1	4	2008	1	0	0	0	0	0	0	0	0	0	0	0	0		1	2	0	0	0
1634		1	4	2008	1	0	0	0	0	0	0	0	0	0	0	0	0		1	2	0	0	0
1635		1	4	2008	1	0	0	0	0	0	0	0	0	0	0	0	0		1	2	0	0	0
1636		1	4	2008	1	0	0	0	0	0	0	0	0	0	0	0	0		1	2	0	0	0
1637		1	4	2008	1	0	0	0	0	0	0	0	0	0	0	0	0		1	2	0	0	0
1638		1	4	2008	1	0	0	0	0	0	0	0	0	0	0	0	0		1	2	0	0	0
1639		1	4	2008	1	0	0	0	0	0	0	0	0	0	0	0	0		1	2	0	0	0
1640		1	4	2008	1	0	0	0	0	0	0	0	0	0	0	0	0		1	2	0	0	0
1641		1	4	2008	1	0	0	0	0	0	0	0	0	0	0	0	0		1	2	0	0	0
1642		1	4	2008	1	0	0	0	0	0	0	0	0	0	0	0	0		1	2	0	0	0
1643		1	4	2008	1	0	0	0	0	0	0	0	0	0	0	0	0		1	2	0	0	0
1644		1	4	2008	1	0	0	0	0	0	0	0	0	0	0	0	0		1	2	0	0	0
1645		1	4	2008	1	0	0	0	0	0	0	0	0	0	0	0	0		1	2	0	0	0
1646		1	4	2008	1	0	0	0	0	0	0	0	0	0	0	0	0		1	2	0	0	0
1647		1	4	2008	1	0	0	0	0	0	0	0	0	0	0	0	0		1	2	0	0	0
1648		1	4	2008	1	0	0	0	0	0	0	0	0	0	0	0	0		1	2	0	0	0
1649		1	4	2008	1	0	0	0	0	0	0	0	0	0	0	0	0		1	2	0	0	0
1650		1	4	2008	1	0	0	0	0	0	0	0	0	0	0	0	0		1	2	0	0	0
1651		1	4	2008	1	0	0	0	0	0	0	0	0	0	0	0	0		1	2	0	0	0
1652		1	4	2008	1	0	0	0	0	0	0	0	0	0	0	0	0		1	2	0	0	0
1653		1	4	2008	1	0	0	0	0	0	0	0	0	0	0	0	0		1	2	0	0	0
1654		1	4	2008	1	0	0	0	0	0	0	0	0	0	0	0	0		1	2	0	0	0
1655		1	4	2008	1	0	0	0	0	0	0	0	0	0	0	0	0		1	2	0	0	0
1656		1	4	2008	1	0	0	0	0	0	0	0	0	0	0	0	0		1	2	0	0	0
1657		1	4	2008	1	0	0	0	0	0	0	0	0	0	0	0	0		1	2	0	0	0
1658		1	4	2008	1	0	0	0	0	0	0	0	0	0	0	0	0		1	2	0	0	0
1659		1	4	2008	1	0	0	0	0	0	0	0	0	0	0	0	0		1	2	0	0	0
1660		1	4	2008	1	0	0	0	0	0	0	0	0	0	0	0	0		1	2	0	0	0
1661		1	4	2008	1	0	0	0	0	0	0	0	0	0	0	0	0		1	2	0	0	0
1662		1	4	2008	1	0	0	0	0	0	0	0	0	0	0	0	0		1	2	0	0	0
1663		1	4	2008	1	0	0	0	0	0	0	0	0	0	0	0	0		1	2	0	0	0
1664		1	4	2008	1	0	0	0	0	0	0	0	0	0	0	0	0		1	2	0	0	0
1665		1	4	2008	1	0	0	0	0	0	0	0	0	0	0	0	0		1	2	0	0	0
1666		1	4	2008	1	0	0	0	0	0	0	0	0	0	0	0	0		1	2	0	0	0
1667		1	4	2008	1	0	0	0	0	0	0	0	0	0	0	0	0		1	2	0	0	0
1668		1	4	2008	1	0	0	0	0	0	0	0	0	0	0	0	0		1	2	0	0	0
1669		1	4	2008	1	0	0	0	0	0	0	0	0	0	0	0	0		1	2	0	0	0
1670		1	4	2008	1	0	0	0	0	0	0	0	0	0	0	0	0		1	2	0	0	0
1671		1	4	2008	1	0	0	0	0	0	0	0	0	0	0	0	0		1	2	0	0	0
1672		1	4	2008	1	0	0	0	0	0	0	0	0	0	0	0	0		1	2	0	0	0
1673		1	4	2008	1	0	0	0	0	0	0	0	0	0	0	0	0		1	2	0	0	0
1674		1	4	2008	1	0	0	0	0	0	0	0	0	0	0	0	0		1	2	0	0	0
1675		1	4	2008	1	0	0	0	0	0	0	0	0	0	0	0	0		1	2	0	0	0
1676		1	4	2008	1	0	0	0	0	0	0	0	0	0	0	0	0		1	2	0	0	0
1677		1	4	2008	1	0	0	0	0	0	0	0	0	0	0	0	0		1	2	0	0	0
1678		1	4	2008	1	0	0	0	0	0	0	0	0	0	0	0	0		1	2	0	0	0
1679		1	4	2008	1	0	0	0	0	0	0	0	0	0	0	0	0		1	2	0	0	0
1680		1	4	2008	1	0	0	0	0	0	0	0	0	0	0	0	0		1	2	0	0	0
1681		1	4	2008	1	0	0	0	0	0	0	0	0	0	0	0	0		1	2	0	0	0
1682		1	4	2008	1	0	0	0	0	0	0	0	0	0	0	0	0		1	2	0	0	0
1683		1	4	2008	1	0	0	0	0	0	0	0	0	0	0	0	0		1	2	0	0	0
1684		1	4	2008	1	0	0	0	0	0	0	0	0	0	0	0	0		1	2	0	0	0
1685		1	4	2008	1	0	0	0	0	0	0	0	0	0	0	0	0		1	2	0	0	0
1686		1	4	2008	1	0	0	0	0	0	0	0	0	0	0	0	0		1	2	0	0	0
1687		1	4	2008	1	0	0	0	0	0	0	0	0	0	0	0	0		1	2	0	0	0
1688		1	4	2008	1	0	0	0	0	0	0	0	0	0	0	0	0		2	2	0	0	0
1689		1	4	2008	1	0	0	0	0	0	0	0	0	0	0	0	0		2	2	0	0	0
1690		1	4	2008	1	0	0	0	0	0	0	0	0	0	0	0	0		2	2	0	0	0
1691		1	4	2008	1	0	0	0	0	0	0	0	0	0	0	0	0		2	2	0	0	0
1692		1	4	2008	1	0	0	0	0	0	0	0	0	0	0	0	0		2	2	0	0	0
1693		1	4	2008	1	0	0	0	0	0	0	0	0	0	0	0	0		2	2	0	0	0
1694		1	4	2008	1	0	0	0	0	0	0	0	0	0	0	0	0		2	2	0	0	0
1695		1	4	2008	1	0	0	0	0	0	0	0	0	0	0	0	0		2	2	0	0	0
1696		1	4	2008	1	0	0	0	0	0	0	0	0	0	0	0	0		2	2	0	0	0
1697		1	4	2008	1	0	0	0	0	0	0	0	0	0	0	0	0		2	2	0	0	0
1698		1	4	2008	1	0	0	0	0	0	0	0	0	0	0	0	0		2	2	0	0	0
1699		1	4	2008	1	0	0	0	0	0	0	0	0	0	0	0	0		2	2	0	0	0
1700		1	4	2008	1	0	0	0	0	0	0	0	0	0	0	0	0		2	2	0	0	0
1701		1	4	2008	1	0	0	0	0	0	0	0	0	0	0	0	0		2	2	0	0	0
1702		1	4	2008	1	0	0	0	0	0	0	0	0	0	0	0	0		2	2	0	0	0
1703		1	4	2008	1	0	0	0	0	0	0	0	0	0	0	0	0		2	2	0	0	0
1704		1	4	2008	1	0	0	0	0	0	0	0	0	0	0	0	0		2	2	0	0	0
1705		1	4	2008	1	0	0	0	0	0	0	0	0	0	0	0	0		2	2	0	0	0
1706		1	4	2008	1	0	0	0	0	0	0	0	0	0	0	0	0		2	2	0	0	0
1707		1	4	2008	1	0	0	0	0	0	0	0	0	0	0	0	0		2	2	0	0	0
1708		1	4	2008	1	0	0	0	0	0	0	0	0	0	0	0	0		2	2	0	0	0
1709		1	4	2008	1	0	0	0	0	0	0	0	0	0	0	0	0		2	2	0	0	0
1710		1	4	2008	1	0	0	0	0	0	0	0	0	0	0	0	0		2	2	0	0	0
1711		1	4	2008	1	0	0	0	0	0	0	0	0	0	0	0	0		2	2	0	0	0
1712		1	4	2008	1	0	0	0	0	0	0	0	0	0	0	0	0		2	2	0	0	0
1713		1	4	2008	1	0	0	0	0	0	0	0	0	0	0	0	0		2	2	0	0	0
1714		1	4	2008	1	0	0	0	0	0	0	0	0	0	0	0	0		2	2	0	0	0
1715		1	4	2008	1	0	0	0	0	0	0	0	0	0	0	0	0		2	2	0	0	0
1716		1	4	2008	1	0	0	0	0	0	0	0	0	0	0	0	0		2	2	0	0	0
1717		1	4	2008	1	0	0	0	0	0	0	0	0	0	0	0	0		2	2	0	0	0
1718		1	4	2008	1	0	0	0	0	0	0	0	0	0	0	0	0		2	2	0	0	0
1719		1	4	2008	1	0	0	0	0	0	0	0	0	0	0	0	0		2	2	0	0	0
1720		1	4	2008	1	0	0	0	0	0	0	0	0	0	0	0	0		2	2	0	0	0
1721		1	4	2008	1	0	0	0	0	0	0	0	0	0	0	0	0		2	2	0	0	0
1722		1	4	2008	1	0	0	0	0	0	0	0	0	0	0	0	0		2	2	0	0	0
1723		1	4	2008	1	0	0	0	0	0	0	0	0	0	0	0	0		2	2	0	0	0
1724		1	4	2008	1	0	0	0	0	0	0	0	0	0	0	0	0		2	2	0	0	0
1725		1	4	2008	1	0	0	0	0	0	0	0	0	0	0	0	0		2	2	0	0	0
1726		1	4	2008	1	0	0	0	0	0	0	0	0	0	0	0	0		2	2	0	0	0
1727		1	4	2008	1	0	0	0	0	0	0	0	0	0	0	0	0		2	2	0	0	0
1728		1	4	2008	1	0	0	0	0	0	0	0	0	0	0	0	0		2	2	0	0	0
1729		1	5	2008	1	0	1	0	0	0	0	0	0	0	0	1	1	1	1	2	0	0	1
1730		1	5	2008	1	0	1	0	0	0	0	0	0	0	0	1	1	1	1	2	0	0	1
1731		1	5	2008	1	0	1	0	0	0	0	0	0	0	0	1	1	1	1	2	0	0	1
1732		1	5	2008	1	0	1	0	0	0	0	0	0	0	0	1	1	1	1	2	0	0	1
1733		1	5	2008	1	0	2	0	0	0	0	0	0	0	0	2	1	1	1	2	0	0	1
1734		1	5	2008	1	0	0	0	0	0	0	0	0	0	0	0	0		2	2	0	0	0
1735		1	5	2008	1	0	0	0	0	0	0	0	0	0	0	0	0		2	2	0	0	0
1736		1	5	2008	1	0	0	0	0	0	0	0	0	0	0	0	0		2	2	0	0	0
1737		1	5	2008	1	0	0	0	0	0	0	0	0	0	0	0	0		2	2	0	0	0
1738		1	5	2008	1	0	0	0	0	0	0	0	0	0	0	0	0		2	2	0	0	0
1739		1	5	2008	1	0	0	0	0	0	0	0	0	0	0	0	0		2	2	0	0	0
1740		1	5	2008	1	0	0	0	0	0	0	0	0	0	0	0	0		2	2	0	0	0
1741		1	5	2008	1	0	0	0	0	0	0	0	0	0	0	0	0		2	2	0	0	0
1742		1	5	2008	1	0	0	0	0	0	0	0	0	0	0	0	0		2	2	0	0	0
1743		1	5	2008	1	0	0	0	0	0	0	0	0	0	0	0	0		2	2	0	0	0
1744		1	5	2008	1	0	0	0	0	0	0	0	0	0	0	0	0		2	2	0	0	0
1745		1	5	2008	1	0	0	0	0	0	0	0	0	0	0	0	0		2	2	0	0	0
1746		1	5	2008	1	0	0	0	0	0	0	0	0	0	0	0	0		2	2	0	0	0
1747		1	5	2008	1	0	0	0	0	0	0	0	0	0	0	0	0		2	2	0	0	0
1748		1	5	2008	1	0	0	0	0	0	0	0	0	0	0	0	0		2	2	0	0	0
1749		1	5	2008	1	0	0	0	0	0	0	0	0	0	0	0	0		2	2	0	0	0
1750		1	5	2008	1	0	0	0	0	0	0	0	0	0	0	0	0		2	2	0	0	0
1751		1	5	2008	1	0	0	0	0	0	0	0	0	0	0	0	0		2	2	0	0	0
1752		1	5	2008	1	0	0	0	0	0	0	0	0	0	0	0	0		2	2	0	0	0
1753		1	5	2008	1	0	0	0	0	0	0	0	0	0	0	0	0		2	2	0	0	0
1754		1	5	2008	1	0	0	0	0	0	0	0	0	0	0	0	0		2	2	0	0	0
1755		1	5	2008	1	0	0	0	0	0	0	0	0	0	0	0	0		2	2	0	0	0
1756		1	5	2008	1	0	0	0	0	0	0	0	0	0	0	0	0		2	2	0	0	0
1757		1	5	2008	1	0	0	0	0	0	0	0	0	0	0	0	0		2	2	0	0	0
1758		1	5	2008	1	0	0	0	0	0	0	0	0	0	0	0	0		2	2	0	0	0
1759		1	5	2008	1	0	0	0	0	0	0	0	0	0	0	0	0		2	2	0	0	0
1760		1	5	2008	1	0	0	0	0	0	0	0	0	0	0	0	0		2	2	0	0	0
1761		1	5	2008	1	0	0	0	0	0	0	0	0	0	0	0	0		2	2	0	0	0
1762		1	5	2008	1	0	0	0	0	0	0	0	0	0	0	0	0		2	2	0	0	0
1763		1	5	2008	1	0	0	0	0	0	0	0	0	0	0	0	0		2	2	0	0	0
1764		1	5	2008	1	0	0	0	0	0	0	0	0	0	0	0	0		2	2	0	0	0
1765		1	5	2008	1	0	0	0	0	0	0	0	0	0	0	0	0		2	2	0	0	0
1766		1	5	2008	1	0	0	0	0	0	0	0	0	0	0	0	0		2	2	0	0	0
1767		1	5	2008	1	0	0	0	0	0	0	0	0	0	0	0	0		2	2	0	0	0
1768		1	5	2008	1	0	0	0	0	0	0	0	0	0	0	0	0		2	2	0	0	0
1769		1	5	2008	1	0	0	0	0	0	0	0	0	0	0	0	0		2	2	0	0	0
1770		1	5	2008	1	0	0	0	0	0	0	0	0	0	0	0	0		2	2	0	0	0
1771		1	5	2008	1	0	0	0	0	0	0	0	0	0	0	0	0		2	2	0	0	0
1772		1	5	2008	1	0	0	0	0	0	0	0	0	0	0	0	0		2	2	0	0	0
1773		1	5	2008	1	0	0	0	0	0	0	0	0	0	0	0	0		2	2	0	0	0
1774		1	5	2008	1	0	0	0	0	0	0	0	0	0	0	0	0		2	2	0	0	0
1775		1	5	2008	1	0	0	0	0	0	0	0	0	0	0	0	0		2	2	0	0	0
1776		1	5	2008	1	0	0	0	0	0	0	0	0	0	0	0	0		2	2	0	0	0
1777		1	5	2008	1	0	0	0	0	0	0	0	0	0	0	0	0		2	2	0	0	0
1778		1	5	2008	1	0	0	0	0	0	0	0	0	0	0	0	0		2	2	0	0	0
1779		1	5	2008	1	0	0	0	0	0	0	0	0	0	0	0	0		2	2	0	0	0
1780		1	5	2008	1	0	0	0	0	0	0	0	0	0	0	0	0		2	2	0	0	0
1781		1	5	2008	1	0	0	0	0	0	0	0	0	0	0	0	0		2	2	0	0	0
1782		1	5	2008	1	0	0	0	0	0	0	0	0	0	0	0	0		2	2	0	0	0
1783		1	5	2008	1	0	0	0	0	0	0	0	0	0	0	0	0		2	2	0	0	0
1784		1	5	2008	1	0	0	0	0	0	0	0	0	0	0	0	0		2	2	0	0	0
1785		1	5	2008	1	0	0	0	0	0	0	0	0	0	0	0	0		2	2	0	0	0
1786		1	5	2008	1	0	0	0	0	0	0	0	0	0	0	0	0		2	2	0	0	0
1787		1	5	2008	1	0	0	0	0	0	0	0	0	0	0	0	0		2	2	0	0	0
1788		1	5	2008	1	0	0	0	0	0	0	0	0	0	0	0	0		2	2	0	0	0
1789		1	5	2008	1	0	0	0	0	0	0	0	0	0	0	0	0		2	2	0	0	0
1790		1	5	2008	1	0	0	0	0	0	0	0	0	0	0	0	0		2	2	0	0	0
1791		1	5	2008	1	0	0	0	0	0	0	0	0	0	0	0	0		2	2	0	0	0
1792		1	5	2008	1	0	0	0	0	0	0	0	0	0	0	0	0		2	2	0	0	0
1793		1	5	2008	1	0	0	0	0	0	0	0	0	0	0	0	0		2	2	0	0	0
1794		1	5	2008	1	0	0	0	0	0	0	0	0	0	0	0	0		2	2	0	0	0
1795		1	5	2008	1	0	0	0	0	0	0	0	0	0	0	0	0		2	2	0	0	0
1796		1	5	2008	1	0	0	0	0	0	0	0	0	0	0	0	0		2	2	0	0	0
1797		1	5	2008	1	0	0	0	0	0	0	0	0	0	0	0	0		2	2	0	0	0
1798		1	5	2008	1	0	0	0	0	0	0	0	0	0	0	0	0		2	2	0	0	0
1799		1	5	2008	1	0	0	0	0	0	0	0	0	0	0	0	0		2	2	0	0	0
1800		1	5	2008	1	0	0	0	0	0	0	0	0	0	0	0	0		2	2	0	0	0
1801		1	5	2008	1	0	0	0	0	0	0	0	0	0	0	0	0		2	2	0	0	0
1802		1	5	2008	1	0	0	0	0	0	0	0	0	0	0	0	0		2	2	0	0	0
1803		1	5	2008	1	0	0	0	0	0	0	0	0	0	0	0	0		2	2	0	0	0
1804		1	5	2008	1	0	0	0	0	0	0	0	0	0	0	0	0		2	2	0	0	0
1805		1	5	2008	1	0	0	0	0	0	0	0	0	0	0	0	0		2	2	0	0	0
1806		1	5	2008	1	0	0	0	0	0	0	0	0	0	0	0	0		2	2	0	0	0
1807		1	5	2008	1	0	0	0	0	0	0	0	0	0	0	0	0		2	2	0	0	0
1808		1	5	2008	1	0	0	0	0	0	0	0	0	0	0	0	0		2	2	0	0	0
1809		1	5	2008	1	0	0	0	0	0	0	0	0	0	0	0	0		2	2	0	0	0
1810		1	5	2008	1	0	0	0	0	0	0	0	0	0	0	0	0		2	2	0	0	0
1811		1	5	2008	1	0	0	0	0	0	0	0	0	0	0	0	0		2	2	0	0	0
1812		1	5	2008	1	0	0	0	0	0	0	0	0	0	0	0	0		2	2	0	0	0
1813		1	5	2008	1	0	0	0	0	0	0	0	0	0	0	0	0		2	2	0	0	0
1814		1	5	2008	1	0	0	0	0	0	0	0	0	0	0	0	0		2	2	0	0	0
1815		1	5	2008	1	0	0	0	0	0	0	0	0	0	0	0	0		2	2	0	0	0
1816		1	5	2008	1	0	0	0	0	0	0	0	0	0	0	0	0		2	2	0	0	0
1817		1	5	2008	1	0	0	0	0	0	0	0	0	0	0	0	0		2	2	0	0	0
1818		1	5	2008	1	0	0	0	0	0	0	0	0	0	0	0	0		2	2	0	0	0
1819		1	5	2008	1	0	0	0	0	0	0	0	0	0	0	0	0		2	2	0	0	0
1820		1	5	2008	1	0	0	0	0	0	0	0	0	0	0	0	0		2	2	0	0	0
1821		1	5	2008	1	0	0	0	0	0	0	0	0	0	0	0	0		2	2	0	0	0
1822		1	5	2008	1	0	0	0	0	0	0	0	0	0	0	0	0		2	2	0	0	0
1823		1	5	2008	1	0	0	0	0	0	0	0	0	0	0	0	0		2	2	0	0	0
1824		1	5	2008	1	0	0	0	0	0	0	0	0	0	0	0	0		2	2	0	0	0
1825		1	5	2008	1	0	0	0	0	0	0	0	0	0	0	0	0		2	2	0	0	0
1826		1	5	2008	1	0	0	0	0	0	0	0	0	0	0	0	0		2	2	0	0	0
1827		1	5	2008	1	0	0	0	0	0	0	0	0	0	0	0	0		2	2	0	0	0
1828		1	5	2008	1	0	0	0	0	0	0	0	0	0	0	0	0		2	2	0	0	0
1829		1	5	2008	1	0	0	0	0	0	0	0	0	0	0	0	0		2	2	0	0	0
1830		1	5	2008	1	0	0	0	0	0	0	0	0	0	0	0	0		2	2	0	0	0
1831		1	5	2008	1	0	0	0	0	0	0	0	0	0	0	0	0		2	2	0	0	0
1832		1	5	2008	1	0	0	0	0	0	0	0	0	0	0	0	0		2	2	0	0	0
1833		1	5	2008	1	0	0	0	0	0	0	0	0	0	0	0	0		2	2	0	0	0
1834		1	5	2008	1	0	0	0	0	0	0	0	0	0	0	0	0		2	2	0	0	0
1835		1	5	2008	1	0	0	0	0	0	0	0	0	0	0	0	0		2	2	0	0	0
1836		1	5	2008	1	0	0	0	0	0	0	0	0	0	0	0	0		2	2	0	0	0
1837		1	5	2008	1	0	0	0	0	0	0	0	0	0	0	0	0		2	2	0	0	0
1838		1	5	2008	1	0	0	0	0	0	0	0	0	0	0	0	0		2	2	0	0	0
1839		1	5	2008	1	0	0	0	0	0	0	0	0	0	0	0	0		2	2	0	0	0
1840		1	5	2008	1	0	0	0	0	0	0	0	0	0	0	0	0		2	2	0	0	0
1841		1	5	2008	1	0	0	0	0	0	0	0	0	0	0	0	0		2	2	0	0	0
1842		1	5	2008	1	0	0	0	0	0	0	0	0	0	0	0	0		2	2	0	0	0
1843		1	5	2008	1	0	0	0	0	0	0	0	0	0	0	0	0		2	2	0	0	0
1844		1	5	2008	1	0	0	0	0	0	0	0	0	0	0	0	0		2	2	0	0	0
1845		1	5	2008	1	0	0	0	0	0	0	0	0	0	0	0	0		2	2	0	0	0
1846		1	5	2008	1	0	0	0	0	0	0	0	0	0	0	0	0		2	2	0	0	0
1847		1	5	2008	1	0	0	0	0	0	0	0	0	0	0	0	0		2	2	0	0	0
1848		1	5	2008	1	0	0	0	0	0	0	0	0	0	0	0	0		2	2	0	0	0
1849		1	5	2008	1	0	0	0	0	0	0	0	0	0	0	0	0		2	2	0	0	0
1850		1	5	2008	1	0	0	0	0	0	0	0	0	0	0	0	0		2	2	0	0	0
1851		1	5	2008	1	0	0	0	0	0	0	0	0	0	0	0	0		2	2	0	0	0
1852		1	5	2008	1	0	0	0	0	0	0	0	0	0	0	0	0		2	2	0	0	0
1853		1	5	2008	1	0	0	0	0	0	0	0	0	0	0	0	0		2	2	0	0	0
1854		1	5	2008	1	0	0	0	0	0	0	0	0	0	0	0	0		2	2	0	0	0
1855		1	5	2008	1	0	0	0	0	0	0	0	0	0	0	0	0		2	2	0	0	0
1856		1	5	2008	1	0	0	0	0	0	0	0	0	0	0	0	0		2	2	0	0	0
1857		1	5	2008	1	0	0	0	0	0	0	0	0	0	0	0	0		2	2	0	0	0
1858		1	5	2008	1	0	0	0	0	0	0	0	0	0	0	0	0		2	2	0	0	0
1859		1	5	2008	1	0	0	0	0	0	0	0	0	0	0	0	0		2	2	0	0	0
1860		1	5	2008	1	0	0	0	0	0	0	0	0	0	0	0	0		2	2	0	0	0
1861		1	5	2008	1	0	0	0	0	0	0	0	0	0	0	0	0		2	2	0	0	0
1862		1	5	2008	1	0	0	0	0	0	0	0	0	0	0	0	0		2	2	0	0	0
1863		1	5	2008	1	0	0	0	0	0	0	0	0	0	0	0	0		2	2	0	0	0
1864		1	5	2008	1	0	0	0	0	0	0	0	0	0	0	0	0		2	2	0	0	0
1865		1	5	2008	1	0	0	0	0	0	0	0	0	0	0	0	0		1	2	0	0	0
1866		1	5	2008	1	0	0	0	0	0	0	0	0	0	0	0	0		1	2	0	0	0
1867		1	5	2008	1	0	0	0	0	0	0	0	0	0	0	0	0		1	2	0	0	0
1868		1	5	2008	1	0	0	0	0	0	0	0	0	0	0	0	0		1	2	0	0	0
1869		1	5	2008	1	0	0	0	0	0	0	0	0	0	0	0	0		1	2	0	0	0
1870		1	5	2008	1	0	0	0	0	0	0	0	0	0	0	0	0		1	2	0	0	0
1871		1	5	2008	1	0	0	0	0	0	0	0	0	0	0	0	0		1	2	0	0	0
1872		1	5	2008	1	0	0	0	0	0	0	0	0	0	0	0	0		1	2	0	0	0
1873		1	5	2008	1	0	0	0	0	0	0	0	0	0	0	0	0		1	2	0	0	0
1874		1	5	2008	1	0	0	0	0	0	0	0	0	0	0	0	0		1	2	0	0	0
1875		1	5	2008	1	0	0	0	0	0	0	0	0	0	0	0	0		1	2	0	0	0
1876		1	5	2008	1	0	0	0	0	0	0	0	0	0	0	0	0		1	2	0	0	0
1877		1	5	2008	1	0	0	0	0	0	0	0	0	0	0	0	0		1	2	0	0	0
1878		1	5	2008	1	0	0	0	0	0	0	0	0	0	0	0	0		1	2	0	0	0
1879		1	5	2008	1	0	0	0	0	0	0	0	0	0	0	0	0		1	2	0	0	0
1880		1	5	2008	1	0	0	0	0	0	0	0	0	0	0	0	0		1	2	0	0	0
1881		1	5	2008	1	0	0	0	0	0	0	0	0	0	0	0	0		1	2	0	0	0
1882		1	5	2008	1	0	0	0	0	0	0	0	0	0	0	0	0		1	2	0	0	0
1883		1	5	2008	1	0	0	0	0	0	0	0	0	0	0	0	0		1	2	0	0	0
1884		1	5	2008	1	0	0	0	0	0	0	0	0	0	0	0	0		1	2	0	0	0
1885		1	5	2008	1	0	0	0	0	0	0	0	0	0	0	0	0		1	2	0	0	0
1886		1	5	2008	1	0	0	0	0	0	0	0	0	0	0	0	0		1	2	0	0	0
1887		1	5	2008	1	0	0	0	0	0	0	0	0	0	0	0	0		1	2	0	0	0
1888		1	5	2008	1	0	0	0	0	0	0	0	0	0	0	0	0		1	2	0	0	0
1889		1	5	2008	1	0	0	0	0	0	0	0	0	0	0	0	0		1	2	0	0	0
1890		1	5	2008	1	0	0	0	0	0	0	0	0	0	0	0	0		1	2	0	0	0
1891		1	5	2008	1	0	0	0	0	0	0	0	0	0	0	0	0		1	2	0	0	0
1892		1	5	2008	1	0	0	0	0	0	0	0	0	0	0	0	0		1	2	0	0	0
1893		1	5	2008	1	0	0	0	0	0	0	0	0	0	0	0	0		1	2	0	0	0
1894		1	5	2008	1	0	0	0	0	0	0	0	0	0	0	0	0		1	2	0	0	0
1895		1	5	2008	1	0	0	0	0	0	0	0	0	0	0	0	0		1	2	0	0	0
1896		1	5	2008	1	0	0	0	0	0	0	0	0	0	0	0	0		1	2	0	0	0
1897		1	5	2008	1	0	0	0	0	0	0	0	0	0	0	0	0		1	2	0	0	0
1898		1	5	2008	1	0	0	0	0	0	0	0	0	0	0	0	0		1	2	0	0	0
1899		1	5	2008	1	0	0	0	0	0	0	0	0	0	0	0	0		1	2	0	0	0
1900		1	5	2008	1	0	0	0	0	0	0	0	0	0	0	0	0		1	2	0	0	0
1901		1	5	2008	1	0	0	0	0	0	0	0	0	0	0	0	0		1	2	0	0	0
1902		1	5	2008	1	0	0	0	0	0	0	0	0	0	0	0	0		1	2	0	0	0
1903		1	5	2008	1	0	0	0	0	0	0	0	0	0	0	0	0		1	2	0	0	0
1904		1	5	2008	1	0	0	0	0	0	0	0	0	0	0	0	0		1	2	0	0	0
1905		1	5	2008	1	0	0	0	0	0	0	0	0	0	0	0	0		1	2	0	0	0
1906		1	5	2008	1	0	0	0	0	0	0	0	0	0	0	0	0		1	2	0	0	0
1907		1	5	2008	1	0	0	0	0	0	0	0	0	0	0	0	0		1	2	0	0	0
1908		1	5	2008	1	0	0	0	0	0	0	0	0	0	0	0	0		1	2	0	0	0
1909		1	5	2008	1	0	0	0	0	0	0	0	0	0	0	0	0		1	2	0	0	0
1910		1	5	2008	1	0	0	0	0	0	0	0	0	0	0	0	0		1	2	0	0	0
1911		1	5	2008	1	0	0	0	0	0	0	0	0	0	0	0	0		1	2	0	0	0
1912		1	5	2008	1	0	0	0	0	0	0	0	0	0	0	0	0		1	2	0	0	0
1913		1	5	2008	1	0	0	0	0	0	0	0	0	0	0	0	0		1	2	0	0	0
1914		1	5	2008	1	0	0	0	0	0	0	0	0	0	0	0	0		1	2	0	0	0
1915		1	5	2008	1	0	0	0	0	0	0	0	0	0	0	0	0		1	2	0	0	0
1916		1	5	2008	1	0	0	0	0	0	0	0	0	0	0	0	0		1	2	0	0	0
1917		1	5	2008	1	0	0	0	0	0	0	0	0	0	0	0	0		1	2	0	0	0
1918		1	5	2008	1	0	0	0	0	0	0	0	0	0	0	0	0		1	2	0	0	0
1919		1	5	2008	1	0	0	0	0	0	0	0	0	0	0	0	0		1	2	0	0	0
1920		1	5	2008	1	0	0	0	0	0	0	0	0	0	0	0	0		1	2	0	0	0
1921		1	5	2008	1	0	0	0	0	0	0	0	0	0	0	0	0		1	2	0	0	0
1922		1	5	2008	1	0	0	0	0	0	0	0	0	0	0	0	0		1	2	0	0	0
1923		1	5	2008	1	0	0	0	0	0	0	0	0	0	0	0	0		1	2	0	0	0
1924		1	5	2008	1	0	0	0	0	0	0	0	0	0	0	0	0		1	2	0	0	0
1925		1	5	2008	1	0	0	0	0	0	0	0	0	0	0	0	0		1	2	0	0	0
1926		1	5	2008	1	0	0	0	0	0	0	0	0	0	0	0	0		1	2	0	0	0
1927		1	5	2008	1	0	0	0	0	0	0	0	0	0	0	0	0		1	2	0	0	0
1928		1	5	2008	1	0	0	0	0	0	0	0	0	0	0	0	0		1	2	0	0	0
1929		1	5	2008	1	0	0	0	0	0	0	0	0	0	0	0	0		1	2	0	0	0
1930		1	5	2008	1	0	0	0	0	0	0	0	0	0	0	0	0		1	2	0	0	0
1931		1	5	2008	1	0	0	0	0	0	0	0	0	0	0	0	0		1	2	0	0	0
1932		1	5	2008	1	0	0	0	0	0	0	0	0	0	0	0	0		1	2	0	0	0
1933		1	5	2008	1	0	0	0	0	0	0	0	0	0	0	0	0		1	2	0	0	0
1934		1	5	2008	1	0	0	0	0	0	0	0	0	0	0	0	0		1	2	0	0	0
1935		1	5	2008	1	0	0	0	0	0	0	0	0	0	0	0	0		1	2	0	0	0
1936		1	5	2008	1	0	0	0	0	0	0	0	0	0	0	0	0		1	2	0	0	0
1937		1	5	2008	1	0	0	0	0	0	0	0	0	0	0	0	0		1	2	0	0	0
1938		1	5	2008	1	0	0	0	0	0	0	0	0	0	0	0	0		1	2	0	0	0
1939		1	5	2008	1	0	0	0	0	0	0	0	0	0	0	0	0		1	2	0	0	0
1940		1	5	2008	1	0	0	0	0	0	0	0	0	0	0	0	0		1	2	0	0	0
1941		1	5	2008	1	0	0	0	0	0	0	0	0	0	0	0	0		1	2	0	0	0
1942		1	5	2008	1	0	0	0	0	0	0	0	0	0	0	0	0		1	2	0	0	0
1943		1	6	2008	1	0	1	0	0	0	0	0	0	0	0	1	1	1	2	2	0	0	1
1944		1	6	2008	1	0	0	0	0	0	0	0	0	1	0	1	1	1	2	2	0	0	1
1945		1	6	2008	1	0	0	0	0	0	1	0	0	0	0	1	1	1	2	2	0	0	1
1946		1	6	2008	1	1	0	0	0	0	0	0	0	0	0	1	1	1	2	2	0	0	1
1947		1	6	2008	1	0	1	0	0	0	0	0	0	0	0	1	1	1	2	2	0	0	1
1948		1	6	2008	1	0	0	0	0	0	1	0	0	0	0	1	1	1	2	2	0	0	1
1949		1	6	2008	1	0	0	0	0	0	1	0	0	0	0	1	1	1	2	2	0	0	1
1950		1	6	2008	1	0	1	0	0	0	0	0	0	0	0	1	1	1	2	2	0	0	1
1951		1	6	2008	1	0	0	0	0	0	0	0	1	0	0	1	1	1	2	2	1	2	1
1952		1	6	2008	1	0	0	0	0	0	0	0	1	0	0	1	1	1	2	2	1	2	1
1953		1	6	2008	1	0	1	0	0	0	0	0	1	0	0	2	2	2	2	2	0	0	1
1954		1	6	2008	1	0	0	0	0	0	1	0	0	0	0	1	1	1	2	2	0	0	1
1955		1	6	2008	1	0	1	0	0	0	0	0	0	0	0	1	1	1	2	2	0	0	1
1956		1	6	2008	1	0	1	0	0	0	0	0	0	0	0	1	1	1	1	2	0	0	1
1957		1	6	2008	1	0	1	0	0	0	0	0	0	0	0	1	1	1	1	2	0	0	1
1958		1	6	2008	1	0	1	0	0	0	0	0	0	0	0	1	1	1	1	2	0	0	1
1959		1	6	2008	1	0	0	0	0	0	1	0	0	0	0	1	1	1	1	2	0	0	1
1960		1	6	2008	1	0	0	0	0	0	1	0	0	0	0	1	1	1	1	2	0	0	1
1961		1	6	2008	1	0	0	0	0	0	1	0	0	0	0	1	1	1	1	2	0	0	1
1962		1	6	2008	1	0	0	0	0	0	0	0	0	0	0	0	0		1	2	0	0	0
1963		1	6	2008	1	0	0	0	0	0	0	0	0	0	0	0	0		1	2	0	0	0
1964		1	6	2008	1	0	0	0	0	0	0	0	0	0	0	0	0		1	2	0	0	0
1965		1	6	2008	1	0	0	0	0	0	0	0	0	0	0	0	0		1	2	0	0	0
1966		1	6	2008	1	0	0	0	0	0	0	0	0	0	0	0	0		1	2	0	0	0
1967		1	6	2008	1	0	0	0	0	0	0	0	0	0	0	0	0		1	2	0	0	0
1968		1	6	2008	1	0	0	0	0	0	0	0	0	0	0	0	0		1	2	0	0	0
1969		1	6	2008	1	0	0	0	0	0	0	0	0	0	0	0	0		1	2	0	0	0
1970		1	6	2008	1	0	0	0	0	0	0	0	0	0	0	0	0		1	2	0	0	0
1971		1	6	2008	1	0	0	0	0	0	0	0	0	0	0	0	0		1	2	0	0	0
1972		1	6	2008	1	0	0	0	0	0	0	0	0	0	0	0	0		1	2	0	0	0
1973		1	6	2008	1	0	0	0	0	0	0	0	0	0	0	0	0		1	2	0	0	0
1974		1	6	2008	1	0	0	0	0	0	0	0	0	0	0	0	0		1	2	0	0	0
1975		1	6	2008	1	0	0	0	0	0	0	0	0	0	0	0	0		1	2	0	0	0
1976		1	6	2008	1	0	0	0	0	0	0	0	0	0	0	0	0		1	2	0	0	0
1977		1	6	2008	1	0	0	0	0	0	0	0	0	0	0	0	0		1	2	0	0	0
1978		1	6	2008	1	0	0	0	0	0	0	0	0	0	0	0	0		1	2	0	0	0
1979		1	6	2008	1	0	0	0	0	0	0	0	0	0	0	0	0		1	2	0	0	0
1980		1	6	2008	1	0	0	0	0	0	0	0	0	0	0	0	0		1	2	0	0	0
1981		1	6	2008	1	0	0	0	0	0	0	0	0	0	0	0	0		1	2	0	0	0
1982		1	6	2008	1	0	0	0	0	0	0	0	0	0	0	0	0		1	2	0	0	0
1983		1	6	2008	1	0	0	0	0	0	0	0	0	0	0	0	0		1	2	0	0	0
1984		1	6	2008	1	0	0	0	0	0	0	0	0	0	0	0	0		1	2	0	0	0
1985		1	6	2008	1	0	0	0	0	0	0	0	0	0	0	0	0		1	2	0	0	0
1986		1	6	2008	1	0	0	0	0	0	0	0	0	0	0	0	0		1	2	0	0	0
1987		1	6	2008	1	0	0	0	0	0	0	0	0	0	0	0	0		1	2	0	0	0
1988		1	6	2008	1	0	0	0	0	0	0	0	0	0	0	0	0		1	2	0	0	0
1989		1	6	2008	1	0	0	0	0	0	0	0	0	0	0	0	0		1	2	0	0	0
1990		1	6	2008	1	0	0	0	0	0	0	0	0	0	0	0	0		1	2	0	0	0
1991		1	6	2008	1	0	0	0	0	0	0	0	0	0	0	0	0		1	2	0	0	0
1992		1	6	2008	1	0	0	0	0	0	0	0	0	0	0	0	0		1	2	0	0	0
1993		1	6	2008	1	0	0	0	0	0	0	0	0	0	0	0	0		1	2	0	0	0
1994		1	6	2008	1	0	0	0	0	0	0	0	0	0	0	0	0		1	2	0	0	0
1995		1	6	2008	1	0	0	0	0	0	0	0	0	0	0	0	0		1	2	0	0	0
1996		1	6	2008	1	0	0	0	0	0	0	0	0	0	0	0	0		1	2	0	0	0
1997		1	6	2008	1	0	0	0	0	0	0	0	0	0	0	0	0		1	2	0	0	0
1998		1	6	2008	1	0	0	0	0	0	0	0	0	0	0	0	0		1	2	0	0	0
1999		1	6	2008	1	0	0	0	0	0	0	0	0	0	0	0	0		1	2	0	0	0
[truncated: 6,903 more rows]

## Sheet: juv AS-SPSS
#	No	SITE	month	year	ARTEMIA	FL	FF	WS	BG	FT	EA	AT	AM	GS	GSP	all/M	SR	SR inf	sex	stage	colour2	colour3	PREV
1	1	2	1	2009	2	0	0	0	0	0	0	0	0	0	0	0	0	0	2	2	0	0	0
2	2	2	1	2009	2	0	0	0	0	0	0	0	0	0	0	0	0	0	2	2	0	0	0
3	3	2	1	2009	2	0	0	0	0	0	0	0	0	0	0	0	0	0	2	2	0	0	0
4	1	2	3	2009	2	0	0	0	0	0	0	0	0	0	0	0	0	0	1	2	0	0	0
5	2	2	3	2009	2	0	0	0	0	0	0	0	0	0	0	0	0	0	1	2	0	0	0
6	3	2	3	2009	2	0	0	0	0	0	0	0	0	0	0	0	0	0	1	2	0	0	0
7	4	2	3	2009	2	0	0	0	0	0	0	0	0	0	0	0	0	0	1	2	0	0	0
8	5	2	3	2009	2	0	0	0	0	0	0	0	0	0	0	0	0	0	1	2	0	0	0
9	6	2	3	2009	2	0	0	0	0	0	0	0	0	0	0	0	0	0	1	2	0	0	0
10	7	2	3	2009	2	0	0	0	0	0	0	0	0	0	0	0	0	0	2	2	0	0	0
11	8	2	3	2009	2	0	0	0	0	0	0	0	0	0	0	0	0	0	2	2	0	0	0
12	1	3	1	2009	2	0	0	0	0	0	0	0	0	0	0	0	0	0	1	2	0	0	0
13	2	3	1	2009	2	0	0	0	0	0	0	0	0	0	0	0	0	0	1	2	0	0	0
14	3	3	1	2009	2	0	0	0	0	0	0	0	0	0	0	0	0	0	1	2	0	0	0
15	4	3	1	2009	2	0	0	0	0	0	0	0	0	0	0	0	0	0	1	2	0	0	0
16	5	3	1	2009	2	0	0	0	0	0	0	0	0	0	0	0	0	0	1	2	0	0	0
17	6	3	1	2009	2	0	0	0	0	0	0	0	0	0	0	0	0	0	1	2	0	0	0
18	7	3	1	2009	2	0	0	0	0	0	0	0	0	0	0	0	0	0	1	2	0	0	0
19	8	3	1	2009	2	0	0	0	0	0	0	0	0	0	0	0	0	0	1	2	0	0	0
20	9	3	1	2009	2	0	0	0	0	0	0	0	0	0	0	0	0	0	1	2	0	0	0
21	10	3	1	2009	2	0	0	0	0	0	0	0	0	0	0	0	0	0	1	2	0	0	0
22	11	3	1	2009	2	0	0	0	0	0	0	0	0	0	0	0	0	0	1	2	0	0	0
23	12	3	1	2009	2	0	0	0	0	0	0	0	0	0	0	0	0	0	1	2	0	0	0
24	13	3	1	2009	2	0	0	0	0	0	0	0	0	0	0	0	0	0	1	2	0	0	0
25	14	3	1	2009	2	0	0	0	0	0	0	0	0	0	0	0	0	0	1	2	0	0	0
26	15	3	1	2009	2	0	0	0	0	0	0	0	0	0	0	0	0	0	1	2	0	0	0
27	16	3	1	2009	2	0	0	0	0	0	0	0	0	0	0	0	0	0	2	2	0	0	0
28	17	3	1	2009	2	0	0	0	0	0	0	0	0	0	0	0	0	0	2	2	0	0	0
29	18	3	1	2009	2	0	0	0	0	0	0	0	0	0	0	0	0	0	2	2	0	0	0
30	19	3	1	2009	2	0	0	0	0	0	0	0	0	0	0	0	0	0	2	2	0	0	0
31	20	3	1	2009	2	0	0	0	0	0	0	0	0	0	0	0	0	0	2	2	0	0	0
32	21	3	1	2009	2	0	0	0	0	0	0	0	0	0	0	0	0	0	2	2	0	0	0
33	22	3	1	2009	2	0	0	0	0	0	0	0	0	0	0	0	0	0	2	2	0	0	0
34	23	3	1	2009	2	0	0	0	0	0	0	0	0	0	0	0	0	0	2	2	0	0	0
35	24	3	1	2009	2	0	0	0	0	0	0	0	0	0	0	0	0	0	2	2	0	0	0
36	25	3	1	2009	2	0	0	0	0	0	0	0	0	0	0	0	0	0	2	2	0	0	0
37	26	3	1	2009	2	0	0	0	0	0	0	0	0	0	0	0	0	0	2	2	0	0	0
38	27	3	1	2009	2	0	0	0	0	0	0	0	0	0	0	0	0	0	2	2	0	0	0
39	28	3	1	2009	2	0	0	0	0	0	0	0	0	0	0	0	0	0	2	2	0	0	0
40	29	3	1	2009	2	0	0	0	0	0	0	0	0	0	0	0	0	0	2	2	0	0	0
41	30	3	1	2009	2	0	0	0	0	0	0	0	0	0	0	0	0	0	2	2	0	0	0
42	31	3	1	2009	2	0	0	0	0	0	0	0	0	0	0	0	0	0	2	2	0	0	0
43	32	3	1	2009	2	0	0	0	0	0	0	0	0	0	0	0	0	0	2	2	0	0	0
44	33	3	1	2009	2	0	0	0	0	0	0	0	0	0	0	0	0	0	2	2	0	0	0
45	34	3	1	2009	2	0	0	0	0	0	0	0	0	0	0	0	0	0	2	2	0	0	0
46	35	3	1	2009	2	0	0	0	0	0	0	0	0	0	0	0	0	0	2	2	0	0	0
47	36	3	1	2009	2	0	0	0	0	0	0	0	0	0	0	0	0	0	2	2	0	0	0
48	37	3	1	2009	2	0	0	0	0	0	0	0	0	0	0	0	0	0	2	2	0	0	0
49	38	3	1	2009	2	0	0	0	0	0	0	0	0	0	0	0	0	0	2	2	0	0	0
50	39	3	1	2009	2	0	0	0	0	0	0	0	0	0	0	0	0	0	2	2	0	0	0
51	40	3	1	2009	2	0	0	0	0	0	0	0	0	0	0	0	0	0	2	2	0	0	0
52	41	3	1	2009	2	0	0	0	0	0	0	0	0	0	0	0	0	0	2	2	0	0	0
53	42	3	1	2009	2	0	0	0	0	0	0	0	0	0	0	0	0	0	2	2	0	0	0
54	43	3	1	2009	2	0	0	0	0	0	0	0	0	0	0	0	0	0	2	2	0	0	0
55	44	3	1	2009	2	0	0	0	0	0	0	0	0	0	0	0	0	0	2	2	0	0	0
56	45	3	1	2009	2	0	0	0	0	0	0	0	0	0	0	0	0	0	2	2	0	0	0
57	46	3	1	2009	2	0	0	0	0	0	0	0	0	0	0	0	0	0	2	2	0	0	0
58	47	3	1	2009	2	0	0	0	0	0	0	0	0	0	0	0	0	0	2	2	0	0	0
59	48	3	1	2009	2	0	0	0	0	0	0	0	0	0	0	0	0	0	2	2	0	0	0
60	49	3	1	2009	2	0	0	0	0	0	0	0	0	0	0	0	0	0	2	2	0	0	0
61	50	3	1	2009	2	0	0	0	0	0	0	0	0	0	0	0	0	0	2	2	0	0	0
62	51	3	1	2009	2	0	0	0	0	0	0	0	0	0	0	0	0	0	2	2	0	0	0
63	52	3	1	2009	2	0	0	0	0	0	0	0	0	0	0	0	0	0	2	2	0	0	0
64	53	3	1	2009	2	0	0	0	0	0	0	0	0	0	0	0	0	0	2	2	0	0	0
65	54	3	1	2009	2	0	0	0	0	0	0	0	0	0	0	0	0	0	2	2	0	0	0
66	55	3	1	2009	2	0	0	0	0	0	0	0	0	0	0	0	0	0	2	2	0	0	0
67	56	3	1	2009	2	0	0	0	0	0	0	0	0	0	0	0	0	0	2	2	0	0	0
68	57	3	1	2009	2	0	0	0	0	0	0	0	0	0	0	0	0	0	2	2	0	0	0
69	58	3	1	2009	2	0	0	0	0	0	0	0	0	0	0	0	0	0	2	2	0	0	0
70	59	3	1	2009	2	0	0	0	0	0	0	0	0	0	0	0	0	0	2	2	0	0	0
71	60	3	1	2009	2	0	0	0	0	0	0	0	0	0	0	0	0	0	2	2	0	0	0
72	61	3	1	2009	2	0	0	0	0	0	0	0	0	0	0	0	0	0	2	2	0	0	0
73	62	3	1	2009	2	0	0	0	0	0	0	0	0	0	0	0	0	0	2	2	0	0	0
74	63	3	1	2009	2	0	0	0	0	0	0	0	0	0	0	0	0	0	2	2	0	0	0
75	64	3	1	2009	2	0	0	0	0	0	0	0	0	0	0	0	0	0	2	2	0	0	0
76	65	3	1	2009	2	0	0	0	0	0	0	0	0	0	0	0	0	0	2	2	0	0	0
77	66	3	1	2009	2	0	0	0	0	0	0	0	0	0	0	0	0	0	2	2	0	0	0
78	67	3	1	2009	2	0	0	0	0	0	0	0	0	0	0	0	0	0	2	2	0	0	0
79	68	3	1	2009	2	0	0	0	0	0	0	0	0	0	0	0	0	0	2	2	0	0	0
80	69	3	1	2009	2	0	0	0	0	0	0	0	0	0	0	0	0	0	2	2	0	0	0
81	70	3	1	2009	2	0	0	0	0	0	0	0	0	0	0	0	0	0	2	2	0	0	0
82	71	3	2	2009	2	2	0	0	0	0	0	0	0	0	0	2	1	1	2	2	0	0	1
83	72	3	2	2009	2	1	0	0	0	0	0	0	0	0	0	1	1	1	2	2	0	0	1
84	73	3	2	2009	2	1	0	0	0	0	0	0	0	0	0	1	1	1	2	2	0	0	1
85	74	3	2	2009	2	1	0	0	0	0	0	0	0	0	0	1	1	1	2	2	0	0	1
86	75	3	2	2009	2	0	1	0	0	0	0	0	0	0	0	1	1	1	2	2	0	0	1
87	76	3	2	2009	2	1	0	0	0	0	0	0	0	0	0	1	1	1	2	2	0	0	1
88	77	3	2	2009	2	1	0	0	0	0	0	0	0	0	0	1	1	1	2	2	0	0	1
89	78	3	2	2009	2	1	0	0	0	0	0	0	0	0	0	1	1	1	2	2	0	0	1
90	79	3	2	2009	2	1	0	0	0	0	0	0	0	0	0	1	1	1	2	2	0	0	1
91	80	3	2	2009	2	1	0	0	0	0	0	0	0	0	0	1	1	1	1	2	0	0	1
92	81	3	2	2009	2	1	0	0	0	0	0	0	0	0	0	1	1	1	1	2	0	0	1
93	82	3	2	2009	2	1	0	0	0	0	0	0	0	0	0	1	1	1	1	2	0	0	1
94	83	3	2	2009	2	1	0	0	0	0	0	0	0	0	0	1	1	1	1	2	0	0	1
95	84	3	2	2009	2	1	0	0	0	0	0	0	0	0	0	1	1	1	1	2	0	0	1
96	85	3	2	2009	2	1	0	0	0	1	0	0	0	0	0	2	2	2	1	2	0	0	1
97	86	3	2	2009	2	1	2	0	0	0	0	0	0	0	0	3	2	2	1	2	0	0	1
98	87	3	2	2009	2	0	1	0	0	0	0	0	0	0	0	1	1	1	1	2	0	0	1
99	88	3	2	2009	2	1	0	0	0	0	0	0	0	0	0	1	1	1	1	2	0	0	1
100	89	3	2	2009	2	0	0	0	0	0	0	0	0	0	0	0	0	0	2	2	0	0	0
101	90	3	2	2009	2	0	0	0	0	0	0	0	0	0	0	0	0	0	2	2	0	0	0
102	91	3	2	2009	2	0	0	0	0	0	0	0	0	0	0	0	0	0	2	2	0	0	0
103	92	3	2	2009	2	0	0	0	0	0	0	0	0	0	0	0	0	0	2	2	0	0	0
104	93	3	2	2009	2	0	0	0	0	0	0	0	0	0	0	0	0	0	2	2	0	0	0
105	94	3	2	2009	2	0	0	0	0	0	0	0	0	0	0	0	0	0	2	2	0	0	0
106	95	3	2	2009	2	0	0	0	0	0	0	0	0	0	0	0	0	0	2	2	0	0	0
107	96	3	2	2009	2	0	0	0	0	0	0	0	0	0	0	0	0	0	2	2	0	0	0
108	97	3	2	2009	2	0	0	0	0	0	0	0	0	0	0	0	0	0	2	2	0	0	0
109	98	3	2	2009	2	0	0	0	0	0	0	0	0	0	0	0	0	0	2	2	0	0	0
110	99	3	2	2009	2	0	0	0	0	0	0	0	0	0	0	0	0	0	2	2	0	0	0
111	100	3	2	2009	2	0	0	0	0	0	0	0	0	0	0	0	0	0	2	2	0	0	0
112	101	3	2	2009	2	0	0	0	0	0	0	0	0	0	0	0	0	0	2	2	0	0	0
113	102	3	2	2009	2	0	0	0	0	0	0	0	0	0	0	0	0	0	2	2	0	0	0
114	103	3	2	2009	2	0	0	0	0	0	0	0	0	0	0	0	0	0	2	2	0	0	0
115	104	3	2	2009	2	0	0	0	0	0	0	0	0	0	0	0	0	0	2	2	0	0	0
116	105	3	2	2009	2	0	0	0	0	0	0	0	0	0	0	0	0	0	2	2	0	0	0
117	106	3	2	2009	2	0	0	0	0	0	0	0	0	0	0	0	0	0	2	2	0	0	0
118	107	3	2	2009	2	0	0	0	0	0	0	0	0	0	0	0	0	0	2	2	0	0	0
119	108	3	2	2009	2	0	0	0	0	0	0	0	0	0	0	0	0	0	2	2	0	0	0
120	109	3	2	2009	2	0	0	0	0	0	0	0	0	0	0	0	0	0	2	2	0	0	0
121	110	3	2	2009	2	0	0	0	0	0	0	0	0	0	0	0	0	0	2	2	0	0	0
122	111	3	2	2009	2	0	0	0	0	0	0	0	0	0	0	0	0	0	2	2	0	0	0
123	112	3	2	2009	2	0	0	0	0	0	0	0	0	0	0	0	0	0	2	2	0	0	0
124	113	3	2	2009	2	0	0	0	0	0	0	0	0	0	0	0	0	0	2	2	0	0	0
125	114	3	2	2009	2	0	0	0	0	0	0	0	0	0	0	0	0	0	2	2	0	0	0
126	115	3	2	2009	2	0	0	0	0	0	0	0	0	0	0	0	0	0	2	2	0	0	0
127	116	3	2	2009	2	0	0	0	0	0	0	0	0	0	0	0	0	0	2	2	0	0	0
128	117	3	2	2009	2	0	0	0	0	0	0	0	0	0	0	0	0	0	2	2	0	0	0
129	118	3	2	2009	2	0	0	0	0	0	0	0	0	0	0	0	0	0	2	2	0	0	0
130	119	3	2	2009	2	0	0	0	0	0	0	0	0	0	0	0	0	0	2	2	0	0	0
131	120	3	2	2009	2	0	0	0	0	0	0	0	0	0	0	0	0	0	2	2	0	0	0
132	121	3	2	2009	2	0	0	0	0	0	0	0	0	0	0	0	0	0	2	2	0	0	0
133	122	3	2	2009	2	0	0	0	0	0	0	0	0	0	0	0	0	0	2	2	0	0	0
134	123	3	2	2009	2	0	0	0	0	0	0	0	0	0	0	0	0	0	2	2	0	0	0
135	124	3	2	2009	2	0	0	0	0	0	0	0	0	0	0	0	0	0	2	2	0	0	0
136	125	3	2	2009	2	0	0	0	0	0	0	0	0	0	0	0	0	0	2	2	0	0	0
137	126	3	2	2009	2	0	0	0	0	0	0	0	0	0	0	0	0	0	2	2	0	0	0
138	127	3	2	2009	2	0	0	0	0	0	0	0	0	0	0	0	0	0	2	2	0	0	0
139	128	3	2	2009	2	0	0	0	0	0	0	0	0	0	0	0	0	0	2	2	0	0	0
140	129	3	2	2009	2	0	0	0	0	0	0	0	0	0	0	0	0	0	2	2	0	0	0
141	130	3	2	2009	2	0	0	0	0	0	0	0	0	0	0	0	0	0	2	2	0	0	0
142	131	3	2	2009	2	0	0	0	0	0	0	0	0	0	0	0	0	0	2	2	0	0	0
143	132	3	2	2009	2	0	0	0	0	0	0	0	0	0	0	0	0	0	2	2	0	0	0
144	133	3	2	2009	2	0	0	0	0	0	0	0	0	0	0	0	0	0	2	2	0	0	0
145	134	3	2	2009	2	0	0	0	0	0	0	0	0	0	0	0	0	0	2	2	0	0	0
146	135	3	2	2009	2	0	0	0	0	0	0	0	0	0	0	0	0	0	2	2	0	0	0
147	136	3	2	2009	2	0	0	0	0	0	0	0	0	0	0	0	0	0	2	2	0	0	0
148	137	3	2	2009	2	0	0	0	0	0	0	0	0	0	0	0	0	0	2	2	0	0	0
149	138	3	2	2009	2	0	0	0	0	0	0	0	0	0	0	0	0	0	2	2	0	0	0
150	139	3	2	2009	2	0	0	0	0	0	0	0	0	0	0	0	0	0	2	2	0	0	0
151	140	3	2	2009	2	0	0	0	0	0	0	0	0	0	0	0	0	0	2	2	0	0	0
152	141	3	2	2009	2	0	0	0	0	0	0	0	0	0	0	0	0	0	2	2	0	0	0
153	142	3	2	2009	2	0	0	0	0	0	0	0	0	0	0	0	0	0	2	2	0	0	0
154	143	3	2	2009	2	0	0	0	0	0	0	0	0	0	0	0	0	0	2	2	0	0	0
155	144	3	2	2009	2	0	0	0	0	0	0	0	0	0	0	0	0	0	2	2	0	0	0
156	145	3	2	2009	2	0	0	0	0	0	0	0	0	0	0	0	0	0	2	2	0	0	0
157	146	3	2	2009	2	0	0	0	0	0	0	0	0	0	0	0	0	0	2	2	0	0	0
158	147	3	2	2009	2	0	0	0	0	0	0	0	0	0	0	0	0	0	2	2	0	0	0
159	148	3	2	2009	2	0	0	0	0	0	0	0	0	0	0	0	0	0	2	2	0	0	0
160	149	3	2	2009	2	0	0	0	0	0	0	0	0	0	0	0	0	0	2	2	0	0	0
161	150	3	2	2009	2	0	0	0	0	0	0	0	0	0	0	0	0	0	2	2	0	0	0
162	151	3	2	2009	2	0	0	0	0	0	0	0	0	0	0	0	0	0	2	2	0	0	0
163	152	3	2	2009	2	0	0	0	0	0	0	0	0	0	0	0	0	0	2	2	0	0	0
164	153	3	2	2009	2	0	0	0	0	0	0	0	0	0	0	0	0	0	2	2	0	0	0
165	154	3	2	2009	2	0	0	0	0	0	0	0	0	0	0	0	0	0	2	2	0	0	0
166	155	3	2	2009	2	0	0	0	0	0	0	0	0	0	0	0	0	0	2	2	0	0	0
167	156	3	2	2009	2	0	0	0	0	0	0	0	0	0	0	0	0	0	2	2	0	0	0
168	157	3	2	2009	2	0	0	0	0	0	0	0	0	0	0	0	0	0	2	2	0	0	0
169	158	3	2	2009	2	0	0	0	0	0	0	0	0	0	0	0	0	0	2	2	0	0	0
170	159	3	2	2009	2	0	0	0	0	0	0	0	0	0	0	0	0	0	2	2	0	0	0
171	160	3	2	2009	2	0	0	0	0	0	0	0	0	0	0	0	0	0	2	2	0	0	0
172	161	3	2	2009	2	0	0	0	0	0	0	0	0	0	0	0	0	0	2	2	0	0	0
173	162	3	2	2009	2	0	0	0	0	0	0	0	0	0	0	0	0	0	2	2	0	0	0
174	163	3	2	2009	2	0	0	0	0	0	0	0	0	0	0	0	0	0	2	2	0	0	0
175	164	3	2	2009	2	0	0	0	0	0	0	0	0	0	0	0	0	0	2	2	0	0	0
176	165	3	2	2009	2	0	0	0	0	0	0	0	0	0	0	0	0	0	2	2	0	0	0
177	166	3	2	2009	2	0	0	0	0	0	0	0	0	0	0	0	0	0	2	2	0	0	0
178	167	3	2	2009	2	0	0	0	0	0	0	0	0	0	0	0	0	0	2	2	0	0	0
179	168	3	2	2009	2	0	0	0	0	0	0	0	0	0	0	0	0	0	2	2	0	0	0
180	169	3	2	2009	2	0	0	0	0	0	0	0	0	0	0	0	0	0	2	2	0	0	0
181	170	3	2	2009	2	0	0	0	0	0	0	0	0	0	0	0	0	0	2	2	0	0	0
182	171	3	2	2009	2	0	0	0	0	0	0	0	0	0	0	0	0	0	2	2	0	0	0
183	172	3	2	2009	2	0	0	0	0	0	0	0	0	0	0	0	0	0	2	2	0	0	0
184	173	3	2	2009	2	0	0	0	0	0	0	0	0	0	0	0	0	0	2	2	0	0	0
185	174	3	2	2009	2	0	0	0	0	0	0	0	0	0	0	0	0	0	2	2	0	0	0
186	175	3	2	2009	2	0	0	0	0	0	0	0	0	0	0	0	0	0	2	2	0	0	0
187	176	3	2	2009	2	0	0	0	0	0	0	0	0	0	0	0	0	0	2	2	0	0	0
188	177	3	2	2009	2	0	0	0	0	0	0	0	0	0	0	0	0	0	2	2	0	0	0
189	178	3	2	2009	2	0	0	0	0	0	0	0	0	0	0	0	0	0	2	2	0	0	0
190	179	3	2	2009	2	0	0	0	0	0	0	0	0	0	0	0	0	0	2	2	0	0	0
191	180	3	2	2009	2	0	0	0	0	0	0	0	0	0	0	0	0	0	2	2	0	0	0
192	181	3	2	2009	2	0	0	0	0	0	0	0	0	0	0	0	0	0	2	2	0	0	0
193	182	3	2	2009	2	0	0	0	0	0	0	0	0	0	0	0	0	0	2	2	0	0	0
194	183	3	2	2009	2	0	0	0	0	0	0	0	0	0	0	0	0	0	2	2	0	0	0
195	184	3	2	2009	2	0	0	0	0	0	0	0	0	0	0	0	0	0	2	2	0	0	0
196	185	3	2	2009	2	0	0	0	0	0	0	0	0	0	0	0	0	0	2	2	0	0	0
197	186	3	2	2009	2	0	0	0	0	0	0	0	0	0	0	0	0	0	2	2	0	0	0
198	187	3	2	2009	2	0	0	0	0	0	0	0	0	0	0	0	0	0	2	2	0	0	0
199	188	3	2	2009	2	0	0	0	0	0	0	0	0	0	0	0	0	0	2	2	0	0	0
200	189	3	2	2009	2	0	0	0	0	0	0	0	0	0	0	0	0	0	1	2	0	0	0
201	190	3	2	2009	2	0	0	0	0	0	0	0	0	0	0	0	0	0	1	2	0	0	0
202	191	3	2	2009	2	0	0	0	0	0	0	0	0	0	0	0	0	0	1	2	0	0	0
203	192	3	2	2009	2	0	0	0	0	0	0	0	0	0	0	0	0	0	1	2	0	0	0
204	193	3	2	2009	2	0	0	0	0	0	0	0	0	0	0	0	0	0	1	2	0	0	0
205	194	3	2	2009	2	0	0	0	0	0	0	0	0	0	0	0	0	0	1	2	0	0	0
206	195	3	2	2009	2	0	0	0	0	0	0	0	0	0	0	0	0	0	1	2	0	0	0
207	196	3	2	2009	2	0	0	0	0	0	0	0	0	0	0	0	0	0	1	2	0	0	0
208	197	3	2	2009	2	0	0	0	0	0	0	0	0	0	0	0	0	0	1	2	0	0	0
209	198	3	2	2009	2	0	0	0	0	0	0	0	0	0	0	0	0	0	1	2	0	0	0
210	199	3	2	2009	2	0	0	0	0	0	0	0	0	0	0	0	0	0	1	2	0	0	0
211	200	3	2	2009	2	0	0	0	0	0	0	0	0	0	0	0	0	0	1	2	0	0	0
212	201	3	2	2009	2	0	0	0	0	0	0	0	0	0	0	0	0	0	1	2	0	0	0
213	202	3	2	2009	2	0	0	0	0	0	0	0	0	0	0	0	0	0	1	2	0	0	0
214	203	3	2	2009	2	0	0	0	0	0	0	0	0	0	0	0	0	0	1	2	0	0	0
215	204	3	2	2009	2	0	0	0	0	0	0	0	0	0	0	0	0	0	1	2	0	0	0
216	205	3	2	2009	2	0	0	0	0	0	0	0	0	0	0	0	0	0	1	2	0	0	0
217	206	3	2	2009	2	0	0	0	0	0	0	0	0	0	0	0	0	0	1	2	0	0	0
218	207	3	2	2009	2	0	0	0	0	0	0	0	0	0	0	0	0	0	1	2	0	0	0
219	208	3	2	2009	2	0	0	0	0	0	0	0	0	0	0	0	0	0	1	2	0	0	0
220	209	3	2	2009	2	0	0	0	0	0	0	0	0	0	0	0	0	0	1	2	0	0	0
221	210	3	2	2009	2	0	0	0	0	0	0	0	0	0	0	0	0	0	1	2	0	0	0
222	211	3	2	2009	2	0	0	0	0	0	0	0	0	0	0	0	0	0	1	2	0	0	0
223	212	3	2	2009	2	0	0	0	0	0	0	0	0	0	0	0	0	0	1	2	0	0	0
224	213	3	2	2009	2	0	0	0	0	0	0	0	0	0	0	0	0	0	1	2	0	0	0
225	214	3	2	2009	2	0	0	0	0	0	0	0	0	0	0	0	0	0	1	2	0	0	0
226	215	3	2	2009	2	0	0	0	0	0	0	0	0	0	0	0	0	0	1	2	0	0	0
227	216	3	2	2009	2	0	0	0	0	0	0	0	0	0	0	0	0	0	1	2	0	0	0
228	217	3	2	2009	2	0	0	0	0	0	0	0	0	0	0	0	0	0	1	2	0	0	0
229	218	3	2	2009	2	0	0	0	0	0	0	0	0	0	0	0	0	0	1	2	0	0	0
230	219	3	2	2009	2	0	0	0	0	0	0	0	0	0	0	0	0	0	1	2	0	0	0
231	220	3	2	2009	2	0	0	0	0	0	0	0	0	0	0	0	0	0	1	2	0	0	0
232	221	3	2	2009	2	0	0	0	0	0	0	0	0	0	0	0	0	0	1	2	0	0	0
233	222	3	2	2009	2	0	0	0	0	0	0	0	0	0	0	0	0	0	1	2	0	0	0
234	223	3	2	2009	2	0	0	0	0	0	0	0	0	0	0	0	0	0	1	2	0	0	0
235	224	3	2	2009	2	0	0	0	0	0	0	0	0	0	0	0	0	0	1	2	0	0	0
236	225	3	2	2009	2	0	0	0	0	0	0	0	0	0	0	0	0	0	1	2	0	0	0
237	226	3	2	2009	2	0	0	0	0	0	0	0	0	0	0	0	0	0	1	2	0	0	0
238	227	3	2	2009	2	0	0	0	0	0	0	0	0	0	0	0	0	0	1	2	0	0	0
239	228	3	2	2009	2	0	0	0	0	0	0	0	0	0	0	0	0	0	1	2	0	0	0
240	229	3	2	2009	2	0	0	0	0	0	0	0	0	0	0	0	0	0	1	2	0	0	0
241	230	3	2	2009	2	0	0	0	0	0	0	0	0	0	0	0	0	0	1	2	0	0	0
242	231	3	2	2009	2	0	0	0	0	0	0	0	0	0	0	0	0	0	1	2	0	0	0
243	232	3	2	2009	2	0	0	0	0	0	0	0	0	0	0	0	0	0	1	2	0	0	0
244	233	3	2	2009	2	0	0	0	0	0	0	0	0	0	0	0	0	0	1	2	0	0	0
245	234	3	2	2009	2	0	0	0	0	0	0	0	0	0	0	0	0	0	1	2	0	0	0
246	235	3	2	2009	2	0	0	0	0	0	0	0	0	0	0	0	0	0	1	2	0	0	0
247	236	3	2	2009	2	0	0	0	0	0	0	0	0	0	0	0	0	0	1	2	0	0	0
248	237	3	2	2009	2	0	0	0	0	0	0	0	0	0	0	0	0	0	1	2	0	0	0
249	238	3	2	2009	2	0	0	0	0	0	0	0	0	0	0	0	0	0	1	2	0	0	0
250	239	3	2	2009	2	0	0	0	0	0	0	0	0	0	0	0	0	0	1	2	0	0	0
251	240	3	2	2009	2	0	0	0	0	0	0	0	0	0	0	0	0	0	1	2	0	0	0
252	241	3	2	2009	2	0	0	0	0	0	0	0	0	0	0	0	0	0	1	2	0	0	0
253	242	3	2	2009	2	0	0	0	0	0	0	0	0	0	0	0	0	0	1	2	0	0	0
254	243	3	2	2009	2	0	0	0	0	0	0	0	0	0	0	0	0	0	1	2	0	0	0
255	244	3	2	2009	2	0	0	0	0	0	0	0	0	0	0	0	0	0	1	2	0	0	0
256	245	3	2	2009	2	0	0	0	0	0	0	0	0	0	0	0	0	0	1	2	0	0	0
257	246	3	2	2009	2	0	0	0	0	0	0	0	0	0	0	0	0	0	1	2	0	0	0
258	247	3	3	2009	2	1	0	0	0	0	0	0	0	0	0	1	1	1	2	2	0	0	1
259	248	3	3	2009	2	1	0	0	0	0	0	0	0	0	0	1	1	1	2	2	0	0	1
260	249	3	3	2009	2	1	0	0	0	0	0	0	0	0	0	1	1	1	2	2	0	0	1
261	250	3	3	2009	2	0	1	0	0	0	0	0	0	0	0	1	1	1	2	2	0	0	1
262	251	3	3	2009	2	1	0	0	0	0	0	0	0	0	0	1	1	1	2	2	0	0	1
263	252	3	3	2009	2	0	1	0	0	0	0	0	0	0	0	1	1	1	1	2	0	0	1
264	253	3	3	2009	2	1	0	0	0	0	0	0	0	0	0	1	1	1	1	2	0	0	1
265	254	3	3	2009	2	1	0	0	0	0	0	0	0	0	0	1	1	1	2	2	0	0	1
266	255	3	3	2009	2	1	0	0	0	0	0	0	0	0	0	1	1	1	2	2	0	0	1
267	256	3	3	2009	2	1	0	0	0	0	0	0	0	0	0	1	1	1	2	2	0	0	1
268	257	3	3	2009	2	1	0	0	0	0	0	0	0	0	0	1	1	1	1	2	0	0	1
269	258	3	3	2009	2	1	0	0	0	0	0	0	0	0	0	1	1	1	2	2	0	0	1
270	259	3	3	2009	2	1	0	0	0	1	0	0	0	0	0	2	2	2	2	2	0	0	1
271	260	3	3	2009	2	0	0	0	0	0	0	0	0	0	0	0	0	0	2	2	0	0	0
272	261	3	3	2009	2	0	0	0	0	0	0	0	0	0	0	0	0	0	2	2	0	0	0
273	262	3	3	2009	2	0	0	0	0	0	0	0	0	0	0	0	0	0	2	2	0	0	0
274	263	3	3	2009	2	0	0	0	0	0	0	0	0	0	0	0	0	0	2	2	0	0	0
275	264	3	3	2009	2	0	0	0	0	0	0	0	0	0	0	0	0	0	2	2	0	0	0
276	265	3	3	2009	2	0	0	0	0	0	0	0	0	0	0	0	0	0	2	2	0	0	0
277	266	3	3	2009	2	0	0	0	0	0	0	0	0	0	0	0	0	0	2	2	0	0	0
278	267	3	3	2009	2	0	0	0	0	0	0	0	0	0	0	0	0	0	2	2	0	0	0
279	268	3	3	2009	2	0	0	0	0	0	0	0	0	0	0	0	0	0	2	2	0	0	0
280	269	3	3	2009	2	0	0	0	0	0	0	0	0	0	0	0	0	0	2	2	0	0	0
281	270	3	3	2009	2	0	0	0	0	0	0	0	0	0	0	0	0	0	2	2	0	0	0
282	271	3	3	2009	2	0	0	0	0	0	0	0	0	0	0	0	0	0	2	2	0	0	0
283	272	3	3	2009	2	0	0	0	0	0	0	0	0	0	0	0	0	0	2	2	0	0	0
284	273	3	3	2009	2	0	0	0	0	0	0	0	0	0	0	0	0	0	2	2	0	0	0
285	274	3	3	2009	2	0	0	0	0	0	0	0	0	0	0	0	0	0	2	2	0	0	0
286	275	3	3	2009	2	0	0	0	0	0	0	0	0	0	0	0	0	0	2	2	0	0	0
287	276	3	3	2009	2	0	0	0	0	0	0	0	0	0	0	0	0	0	2	2	0	0	0
288	277	3	3	2009	2	0	0	0	0	0	0	0	0	0	0	0	0	0	2	2	0	0	0
289	278	3	3	2009	2	0	0	0	0	0	0	0	0	0	0	0	0	0	2	2	0	0	0
290	279	3	3	2009	2	0	0	0	0	0	0	0	0	0	0	0	0	0	2	2	0	0	0
291	280	3	3	2009	2	0	0	0	0	0	0	0	0	0	0	0	0	0	2	2	0	0	0
292	281	3	3	2009	2	0	0	0	0	0	0	0	0	0	0	0	0	0	2	2	0	0	0
293	282	3	3	2009	2	0	0	0	0	0	0	0	0	0	0	0	0	0	2	2	0	0	0
294	283	3	3	2009	2	0	0	0	0	0	0	0	0	0	0	0	0	0	2	2	0	0	0
295	284	3	3	2009	2	0	0	0	0	0	0	0	0	0	0	0	0	0	2	2	0	0	0
296	285	3	3	2009	2	0	0	0	0	0	0	0	0	0	0	0	0	0	2	2	0	0	0
297	286	3	3	2009	2	0	0	0	0	0	0	0	0	0	0	0	0	0	2	2	0	0	0
298	287	3	3	2009	2	0	0	0	0	0	0	0	0	0	0	0	0	0	2	2	0	0	0
299	288	3	3	2009	2	0	0	0	0	0	0	0	0	0	0	0	0	0	2	2	0	0	0
300	289	3	3	2009	2	0	0	0	0	0	0	0	0	0	0	0	0	0	2	2	0	0	0
301	290	3	3	2009	2	0	0	0	0	0	0	0	0	0	0	0	0	0	2	2	0	0	0
302	291	3	3	2009	2	0	0	0	0	0	0	0	0	0	0	0	0	0	2	2	0	0	0
303	292	3	3	2009	2	0	0	0	0	0	0	0	0	0	0	0	0	0	2	2	0	0	0
304	293	3	3	2009	2	0	0	0	0	0	0	0	0	0	0	0	0	0	2	2	0	0	0
305	294	3	3	2009	2	0	0	0	0	0	0	0	0	0	0	0	0	0	2	2	0	0	0
306	295	3	3	2009	2	0	0	0	0	0	0	0	0	0	0	0	0	0	2	2	0	0	0
307	296	3	3	2009	2	0	0	0	0	0	0	0	0	0	0	0	0	0	2	2	0	0	0
308	297	3	3	2009	2	0	0	0	0	0	0	0	0	0	0	0	0	0	2	2	0	0	0
309	298	3	3	2009	2	0	0	0	0	0	0	0	0	0	0	0	0	0	2	2	0	0	0
310	299	3	3	2009	2	0	0	0	0	0	0	0	0	0	0	0	0	0	2	2	0	0	0
311	300	3	3	2009	2	0	0	0	0	0	0	0	0	0	0	0	0	0	2	2	0	0	0
312	301	3	3	2009	2	0	0	0	0	0	0	0	0	0	0	0	0	0	2	2	0	0	0
313	302	3	3	2009	2	0	0	0	0	0	0	0	0	0	0	0	0	0	2	2	0	0	0
314	303	3	3	2009	2	0	0	0	0	0	0	0	0	0	0	0	0	0	2	2	0	0	0
315	304	3	3	2009	2	0	0	0	0	0	0	0	0	0	0	0	0	0	2	2	0	0	0
316	305	3	3	2009	2	0	0	0	0	0	0	0	0	0	0	0	0	0	2	2	0	0	0
317	306	3	3	2009	2	0	0	0	0	0	0	0	0	0	0	0	0	0	2	2	0	0	0
318	307	3	3	2009	2	0	0	0	0	0	0	0	0	0	0	0	0	0	1	2	0	0	0
319	308	3	3	2009	2	0	0	0	0	0	0	0	0	0	0	0	0	0	1	2	0	0	0
320	309	3	3	2009	2	0	0	0	0	0	0	0	0	0	0	0	0	0	1	2	0	0	0
321	310	3	3	2009	2	0	0	0	0	0	0	0	0	0	0	0	0	0	1	2	0	0	0
322	311	3	3	2009	2	0	0	0	0	0	0	0	0	0	0	0	0	0	1	2	0	0	0
323	312	3	3	2009	2	0	0	0	0	0	0	0	0	0	0	0	0	0	1	2	0	0	0
324	313	3	3	2009	2	0	0	0	0	0	0	0	0	0	0	0	0	0	1	2	0	0	0
325	314	3	3	2009	2	0	0	0	0	0	0	0	0	0	0	0	0	0	1	2	0	0	0
326	315	3	3	2009	2	0	0	0	0	0	0	0	0	0	0	0	0	0	1	2	0	0	0
327	316	3	3	2009	2	0	0	0	0	0	0	0	0	0	0	0	0	0	1	2	0	0	0
328	317	3	3	2009	2	0	0	0	0	0	0	0	0	0	0	0	0	0	1	2	0	0	0
329	318	3	3	2009	2	0	0	0	0	0	0	0	0	0	0	0	0	0	1	2	0	0	0
330	319	3	3	2009	2	0	0	0	0	0	0	0	0	0	0	0	0	0	1	2	0	0	0
331	320	3	3	2009	2	0	0	0	0	0	0	0	0	0	0	0	0	0	1	2	0	0	0
332	321	3	3	2009	2	0	0	0	0	0	0	0	0	0	0	0	0	0	1	2	0	0	0
333	322	3	3	2009	2	0	0	0	0	0	0	0	0	0	0	0	0	0	1	2	0	0	0
334	323	3	4	2009	2	1	0	0	0	0	0	0	0	0	0	1	1	1	1	2	0	0	1
335	324	3	4	2009	2	1	0	0	0	0	0	0	0	0	0	1	1	1	1	2	0	0	1
336	325	3	4	2009	2	1	0	0	0	0	0	0	0	0	0	1	1	1	1	2	0	0	1
337	326	3	4	2009	2	1	0	0	0	0	0	0	0	0	0	1	1	1	1	2	0	0	1
338	327	3	4	2009	2	1	0	0	0	0	0	0	0	0	0	1	1	1	1	2	0	0	1
339	328	3	4	2009	2	1	0	0	0	0	0	0	0	0	0	1	1	1	2	2	0	0	1
340	329	3	4	2009	2	1	0	0	0	0	0	0	0	0	0	1	1	1	2	2	0	0	1
341	330	3	4	2009	2	1	0	0	0	0	0	0	0	0	0	1	1	1	2	2	0	0	1
342	331	3	4	2009	2	1	0	0	0	0	0	0	0	0	0	1	1	1	2	2	0	0	1
343	332	3	4	2009	2	1	0	0	0	0	0	0	0	0	0	1	1	1	2	2	0	0	1
344	333	3	4	2009	2	0	0	0	0	0	0	0	0	0	0	0	0	0	2	2	0	0	0
345	334	3	4	2009	2	0	0	0	0	0	0	0	0	0	0	0	0	0	2	2	0	0	0
346	335	3	4	2009	2	0	0	0	0	0	0	0	0	0	0	0	0	0	2	2	0	0	0
347	336	3	4	2009	2	0	0	0	0	0	0	0	0	0	0	0	0	0	2	2	0	0	0
348	337	3	4	2009	2	0	0	0	0	0	0	0	0	0	0	0	0	0	2	2	0	0	0
349	338	3	4	2009	2	0	0	0	0	0	0	0	0	0	0	0	0	0	2	2	0	0	0
350	339	3	4	2009	2	0	0	0	0	0	0	0	0	0	0	0	0	0	2	2	0	0	0
351	340	3	4	2009	2	0	0	0	0	0	0	0	0	0	0	0	0	0	2	2	0	0	0
352	341	3	4	2009	2	0	0	0	0	0	0	0	0	0	0	0	0	0	2	2	0	0	0
353	342	3	4	2009	2	0	0	0	0	0	0	0	0	0	0	0	0	0	2	2	0	0	0
354	343	3	4	2009	2	0	0	0	0	0	0	0	0	0	0	0	0	0	2	2	0	0	0
355	344	3	4	2009	2	0	0	0	0	0	0	0	0	0	0	0	0	0	2	2	0	0	0
356	345	3	4	2009	2	0	0	0	0	0	0	0	0	0	0	0	0	0	2	2	0	0	0
357	346	3	4	2009	2	0	0	0	0	0	0	0	0	0	0	0	0	0	2	2	0	0	0
358	347	3	4	2009	2	0	0	0	0	0	0	0	0	0	0	0	0	0	2	2	0	0	0
359	348	3	4	2009	2	0	0	0	0	0	0	0	0	0	0	0	0	0	2	2	0	0	0
360	349	3	4	2009	2	0	0	0	0	0	0	0	0	0	0	0	0	0	2	2	0	0	0
361	350	3	4	2009	2	0	0	0	0	0	0	0	0	0	0	0	0	0	2	2	0	0	0
362	351	3	4	2009	2	0	0	0	0	0	0	0	0	0	0	0	0	0	2	2	0	0	0
363	352	3	4	2009	2	0	0	0	0	0	0	0	0	0	0	0	0	0	2	2	0	0	0
364	353	3	4	2009	2	0	0	0	0	0	0	0	0	0	0	0	0	0	2	2	0	0	0
365	354	3	4	2009	2	0	0	0	0	0	0	0	0	0	0	0	0	0	2	2	0	0	0
366	355	3	4	2009	2	0	0	0	0	0	0	0	0	0	0	0	0	0	2	2	0	0	0
367	356	3	4	2009	2	0	0	0	0	0	0	0	0	0	0	0	0	0	2	2	0	0	0
368	357	3	4	2009	2	0	0	0	0	0	0	0	0	0	0	0	0	0	2	2	0	0	0
369	358	3	4	2009	2	0	0	0	0	0	0	0	0	0	0	0	0	0	2	2	0	0	0
370	359	3	4	2009	2	0	0	0	0	0	0	0	0	0	0	0	0	0	2	2	0	0	0
371	360	3	4	2009	2	0	0	0	0	0	0	0	0	0	0	0	0	0	2	2	0	0	0
372	361	3	4	2009	2	0	0	0	0	0	0	0	0	0	0	0	0	0	2	2	0	0	0
373	362	3	4	2009	2	0	0	0	0	0	0	0	0	0	0	0	0	0	2	2	0	0	0
374	363	3	4	2009	2	0	0	0	0	0	0	0	0	0	0	0	0	0	2	2	0	0	0
375	364	3	4	2009	2	0	0	0	0	0	0	0	0	0	0	0	0	0	2	2	0	0	0
376	365	3	4	2009	2	0	0	0	0	0	0	0	0	0	0	0	0	0	2	2	0	0	0
377	366	3	4	2009	2	0	0	0	0	0	0	0	0	0	0	0	0	0	2	2	0	0	0
378	367	3	4	2009	2	0	0	0	0	0	0	0	0	0	0	0	0	0	2	2	0	0	0
379	368	3	4	2009	2	0	0	0	0	0	0	0	0	0	0	0	0	0	2	2	0	0	0
380	369	3	4	2009	2	0	0	0	0	0	0	0	0	0	0	0	0	0	2	2	0	0	0
381	370	3	4	2009	2	0	0	0	0	0	0	0	0	0	0	0	0	0	2	2	0	0	0
382	371	3	4	2009	2	0	0	0	0	0	0	0	0	0	0	0	0	0	2	2	0	0	0
383	372	3	4	2009	2	0	0	0	0	0	0	0	0	0	0	0	0	0	2	2	0	0	0
384	373	3	4	2009	2	0	0	0	0	0	0	0	0	0	0	0	0	0	2	2	0	0	0
385	374	3	4	2009	2	0	0	0	0	0	0	0	0	0	0	0	0	0	2	2	0	0	0
386	375	3	4	2009	2	0	0	0	0	0	0	0	0	0	0	0	0	0	2	2	0	0	0
387	376	3	4	2009	2	0	0	0	0	0	0	0	0	0	0	0	0	0	2	2	0	0	0
388	377	3	4	2009	2	0	0	0	0	0	0	0	0	0	0	0	0	0	2	2	0	0	0
389	378	3	4	2009	2	0	0	0	0	0	0	0	0	0	0	0	0	0	2	2	0	0	0
390	379	3	4	2009	2	0	0	0	0	0	0	0	0	0	0	0	0	0	2	2	0	0	0
391	380	3	4	2009	2	0	0	0	0	0	0	0	0	0	0	0	0	0	2	2	0	0	0
392	381	3	4	2009	2	0	0	0	0	0	0	0	0	0	0	0	0	0	2	2	0	0	0
393	382	3	4	2009	2	0	0	0	0	0	0	0	0	0	0	0	0	0	2	2	0	0	0
394	383	3	4	2009	2	0	0	0	0	0	0	0	0	0	0	0	0	0	2	2	0	0	0
395	384	3	4	2009	2	0	0	0	0	0	0	0	0	0	0	0	0	0	2	2	0	0	0
396	385	3	4	2009	2	0	0	0	0	0	0	0	0	0	0	0	0	0	2	2	0	0	0
397	386	3	4	2009	2	0	0	0	0	0	0	0	0	0	0	0	0	0	2	2	0	0	0
398	387	3	4	2009	2	0	0	0	0	0	0	0	0	0	0	0	0	0	2	2	0	0	0
399	388	3	4	2009	2	0	0	0	0	0	0	0	0	0	0	0	0	0	2	2	0	0	0
400	389	3	4	2009	2	0	0	0	0	0	0	0	0	0	0	0	0	0	2	2	0	0	0
401	390	3	4	2009	2	0	0	0	0	0	0	0	0	0	0	0	0	0	2	2	0	0	0
402	391	3	4	2009	2	0	0	0	0	0	0	0	0	0	0	0	0	0	2	2	0	0	0
403	392	3	4	2009	2	0	0	0	0	0	0	0	0	0	0	0	0	0	2	2	0	0	0
404	393	3	4	2009	2	0	0	0	0	0	0	0	0	0	0	0	0	0	2	2	0	0	0
405	394	3	4	2009	2	0	0	0	0	0	0	0	0	0	0	0	0	0	2	2	0	0	0
406	395	3	4	2009	2	0	0	0	0	0	0	0	0	0	0	0	0	0	2	2	0	0	0
407	396	3	4	2009	2	0	0	0	0	0	0	0	0	0	0	0	0	0	2	2	0	0	0
408	397	3	4	2009	2	0	0	0	0	0	0	0	0	0	0	0	0	0	2	2	0	0	0
409	398	3	4	2009	2	0	0	0	0	0	0	0	0	0	0	0	0	0	2	2	0	0	0
410	399	3	4	2009	2	0	0	0	0	0	0	0	0	0	0	0	0	0	2	2	0	0	0
411	400	3	4	2009	2	0	0	0	0	0	0	0	0	0	0	0	0	0	2	2	0	0	0
412	401	3	4	2009	2	0	0	0	0	0	0	0	0	0	0	0	0	0	2	2	0	0	0
413	402	3	4	2009	2	0	0	0	0	0	0	0	0	0	0	0	0	0	2	2	0	0	0
414	403	3	4	2009	2	0	0	0	0	0	0	0	0	0	0	0	0	0	2	2	0	0	0
415	404	3	4	2009	2	0	0	0	0	0	0	0	0	0	0	0	0	0	2	2	0	0	0
416	405	3	4	2009	2	0	0	0	0	0	0	0	0	0	0	0	0	0	2	2	0	0	0
417	406	3	4	2009	2	0	0	0	0	0	0	0	0	0	0	0	0	0	2	2	0	0	0
418	407	3	4	2009	2	0	0	0	0	0	0	0	0	0	0	0	0	0	2	2	0	0	0
419	408	3	4	2009	2	0	0	0	0	0	0	0	0	0	0	0	0	0	2	2	0	0	0
420	409	3	4	2009	2	0	0	0	0	0	0	0	0	0	0	0	0	0	2	2	0	0	0
421	410	3	4	2009	2	0	0	0	0	0	0	0	0	0	0	0	0	0	2	2	0	0	0
422	411	3	4	2009	2	0	0	0	0	0	0	0	0	0	0	0	0	0	2	2	0	0	0
423	412	3	4	2009	2	0	0	0	0	0	0	0	0	0	0	0	0	0	2	2	0	0	0
424	413	3	4	2009	2	0	0	0	0	0	0	0	0	0	0	0	0	0	2	2	0	0	0
425	414	3	4	2009	2	0	0	0	0	0	0	0	0	0	0	0	0	0	2	2	0	0	0
426	415	3	4	2009	2	0	0	0	0	0	0	0	0	0	0	0	0	0	2	2	0	0	0
427	416	3	4	2009	2	0	0	0	0	0	0	0	0	0	0	0	0	0	2	2	0	0	0
428	417	3	4	2009	2	0	0	0	0	0	0	0	0	0	0	0	0	0	2	2	0	0	0
429	418	3	4	2009	2	0	0	0	0	0	0	0	0	0	0	0	0	0	2	2	0	0	0
430	419	3	4	2009	2	0	0	0	0	0	0	0	0	0	0	0	0	0	2	2	0	0	0
431	420	3	4	2009	2	0	0	0	0	0	0	0	0	0	0	0	0	0	2	2	0	0	0
432	421	3	4	2009	2	0	0	0	0	0	0	0	0	0	0	0	0	0	2	2	0	0	0
433	422	3	4	2009	2	0	0	0	0	0	0	0	0	0	0	0	0	0	2	2	0	0	0
434	423	3	4	2009	2	0	0	0	0	0	0	0	0	0	0	0	0	0	2	2	0	0	0
435	424	3	4	2009	2	0	0	0	0	0	0	0	0	0	0	0	0	0	2	2	0	0	0
436	425	3	4	2009	2	0	0	0	0	0	0	0	0	0	0	0	0	0	2	2	0	0	0
437	426	3	4	2009	2	0	0	0	0	0	0	0	0	0	0	0	0	0	2	2	0	0	0
438	427	3	4	2009	2	0	0	0	0	0	0	0	0	0	0	0	0	0	1	2	0	0	0
439	428	3	4	2009	2	0	0	0	0	0	0	0	0	0	0	0	0	0	1	2	0	0	0
440	429	3	4	2009	2	0	0	0	0	0	0	0	0	0	0	0	0	0	1	2	0	0	0
441	430	3	4	2009	2	0	0	0	0	0	0	0	0	0	0	0	0	0	1	2	0	0	0
442	431	3	4	2009	2	0	0	0	0	0	0	0	0	0	0	0	0	0	1	2	0	0	0
443	432	3	4	2009	2	0	0	0	0	0	0	0	0	0	0	0	0	0	1	2	0	0	0
444	433	3	4	2009	2	0	0	0	0	0	0	0	0	0	0	0	0	0	1	2	0	0	0
445	434	3	4	2009	2	0	0	0	0	0	0	0	0	0	0	0	0	0	1	2	0	0	0
446	435	3	4	2009	2	0	0	0	0	0	0	0	0	0	0	0	0	0	1	2	0	0	0
447	436	3	4	2009	2	0	0	0	0	0	0	0	0	0	0	0	0	0	1	2	0	0	0
448	437	3	4	2009	2	0	0	0	0	0	0	0	0	0	0	0	0	0	1	2	0	0	0
449	438	3	4	2009	2	0	0	0	0	0	0	0	0	0	0	0	0	0	1	2	0	0	0
450	439	3	4	2009	2	0	0	0	0	0	0	0	0	0	0	0	0	0	1	2	0	0	0
451	440	3	4	2009	2	0	0	0	0	0	0	0	0	0	0	0	0	0	1	2	0	0	0
452	441	3	4	2009	2	0	0	0	0	0	0	0	0	0	0	0	0	0	1	2	0	0	0
453	442	3	4	2009	2	0	0	0	0	0	0	0	0	0	0	0	0	0	1	2	0	0	0
454	443	3	4	2009	2	0	0	0	0	0	0	0	0	0	0	0	0	0	1	2	0	0	0
455	444	3	4	2009	2	0	0	0	0	0	0	0	0	0	0	0	0	0	1	2	0	0	0
456	445	3	4	2009	2	0	0	0	0	0	0	0	0	0	0	0	0	0	1	2	0	0	0
457	446	3	4	2009	2	0	0	0	0	0	0	0	0	0	0	0	0	0	1	2	0	0	0
458	447	3	4	2009	2	0	0	0	0	0	0	0	0	0	0	0	0	0	1	2	0	0	0
459	448	3	4	2009	2	0	0	0	0	0	0	0	0	0	0	0	0	0	1	2	0	0	0
460	449	3	4	2009	2	0	0	0	0	0	0	0	0	0	0	0	0	0	1	2	0	0	0
461	450	3	4	2009	2	0	0	0	0	0	0	0	0	0	0	0	0	0	1	2	0	0	0
462	451	3	4	2009	2	0	0	0	0	0	0	0	0	0	0	0	0	0	1	2	0	0	0
463	452	3	4	2009	2	0	0	0	0	0	0	0	0	0	0	0	0	0	1	2	0	0	0
464	453	3	4	2009	2	0	0	0	0	0	0	0	0	0	0	0	0	0	1	2	0	0	0
465	454	3	4	2009	2	0	0	0	0	0	0	0	0	0	0	0	0	0	1	2	0	0	0
466	455	3	4	2009	2	0	0	0	0	0	0	0	0	0	0	0	0	0	1	2	0	0	0
467	456	3	4	2009	2	0	0	0	0	0	0	0	0	0	0	0	0	0	1	2	0	0	0
468	457	3	4	2009	2	0	0	0	0	0	0	0	0	0	0	0	0	0	1	2	0	0	0
469	458	3	4	2009	2	0	0	0	0	0	0	0	0	0	0	0	0	0	1	2	0	0	0
470	459	3	4	2009	2	0	0	0	0	0	0	0	0	0	0	0	0	0	1	2	0	0	0
471	460	3	4	2009	2	0	0	0	0	0	0	0	0	0	0	0	0	0	1	2	0	0	0
472	461	3	4	2009	2	0	0	0	0	0	0	0	0	0	0	0	0	0	1	2	0	0	0
473	462	3	4	2009	2	0	0	0	0	0	0	0	0	0	0	0	0	0	1	2	0	0	0
474	463	3	4	2009	2	0	0	0	0	0	0	0	0	0	0	0	0	0	1	2	0	0	0
475	464	3	4	2009	2	0	0	0	0	0	0	0	0	0	0	0	0	0	1	2	0	0	0
476	465	3	4	2009	2	0	0	0	0	0	0	0	0	0	0	0	0	0	1	2	0	0	0
477	466	3	4	2009	2	0	0	0	0	0	0	0	0	0	0	0	0	0	1	2	0	0	0
478	467	3	4	2009	2	0	0	0	0	0	0	0	0	0	0	0	0	0	1	2	0	0	0
479	468	3	4	2009	2	0	0	0	0	0	0	0	0	0	0	0	0	0	1	2	0	0	0
480	469	3	4	2009	2	0	0	0	0	0	0	0	0	0	0	0	0	0	1	2	0	0	0
481	470	3	4	2009	2	0	0	0	0	0	0	0	0	0	0	0	0	0	1	2	0	0	0
482	471	3	4	2009	2	0	0	0	0	0	0	0	0	0	0	0	0	0	1	2	0	0	0
483	472	3	4	2009	2	0	0	0	0	0	0	0	0	0	0	0	0	0	1	2	0	0	0
484	473	3	4	2009	2	0	0	0	0	0	0	0	0	0	0	0	0	0	1	2	0	0	0
485	474	3	4	2009	2	0	0	0	0	0	0	0	0	0	0	0	0	0	1	2	0	0	0
486	475	3	4	2009	2	0	0	0	0	0	0	0	0	0	0	0	0	0	1	2	0	0	0
487	476	3	4	2009	2	0	0	0	0	0	0	0	0	0	0	0	0	0	1	2	0	0	0
488	477	3	4	2009	2	0	0	0	0	0	0	0	0	0	0	0	0	0	1	2	0	0	0
489	478	3	4	2009	2	0	0	0	0	0	0	0	0	0	0	0	0	0	1	2	0	0	0
490	479	3	4	2009	2	0	0	0	0	0	0	0	0	0	0	0	0	0	1	2	0	0	0
491	480	3	4	2009	2	0	0	0	0	0	0	0	0	0	0	0	0	0	1	2	0	0	0
492	481	3	4	2009	2	0	0	0	0	0	0	0	0	0	0	0	0	0	1	2	0	0	0
493	482	3	4	2009	2	0	0	0	0	0	0	0	0	0	0	0	0	0	1	2	0	0	0
494	483	3	4	2009	2	0	0	0	0	0	0	0	0	0	0	0	0	0	1	2	0	0	0
495	484	3	4	2009	2	0	0	0	0	0	0	0	0	0	0	0	0	0	1	2	0	0	0
496	485	3	4	2009	2	0	0	0	0	0	0	0	0	0	0	0	0	0	1	2	0	0	0
497	486	3	4	2009	2	0	0	0	0	0	0	0	0	0	0	0	0	0	1	2	0	0	0
498	487	3	4	2009	2	0	0	0	0	0	0	0	0	0	0	0	0	0	1	2	0	0	0
499	488	3	4	2009	2	0	0	0	0	0	0	0	0	0	0	0	0	0	1	2	0	0	0
500	489	3	4	2009	2	0	0	0	0	0	0	0	0	0	0	0	0	0	1	2	0	0	0
501	490	3	4	2009	2	0	0	0	0	0	0	0	0	0	0	0	0	0	1	2	0	0	0
502	491	3	4	2009	2	0	0	0	0	0	0	0	0	0	0	0	0	0	1	2	0	0	0
503	492	3	4	2009	2	0	0	0	0	0	0	0	0	0	0	0	0	0	1	2	0	0	0
504	493	3	4	2009	2	0	0	0	0	0	0	0	0	0	0	0	0	0	1	2	0	0	0
505	494	3	4	2009	2	0	0	0	0	0	0	0	0	0	0	0	0	0	1	2	0	0	0
506	495	3	4	2009	2	0	0	0	0	0	0	0	0	0	0	0	0	0	1	2	0	0	0
507	496	3	4	2009	2	0	0	0	0	0	0	0	0	0	0	0	0	0	1	2	0	0	0
508	497	3	4	2009	2	0	0	0	0	0	0	0	0	0	0	0	0	0	1	2	0	0	0
509	498	3	4	2009	2	0	0	0	0	0	0	0	0	0	0	0	0	0	1	2	0	0	0
510	499	3	4	2009	2	0	0	0	0	0	0	0	0	0	0	0	0	0	1	2	0	0	0
511	500	3	4	2009	2	0	0	0	0	0	0	0	0	0	0	0	0	0	1	2	0	0	0
512	501	3	4	2009	2	0	0	0	0	0	0	0	0	0	0	0	0	0	1	2	0	0	0
513	502	3	4	2009	2	0	0	0	0	0	0	0	0	0	0	0	0	0	1	2	0	0	0
514	503	3	4	2009	2	0	0	0	0	0	0	0	0	0	0	0	0	0	1	2	0	0	0
515	504	3	4	2009	2	0	0	0	0	0	0	0	0	0	0	0	0	0	1	2	0	0	0
516	505	3	4	2009	2	0	0	0	0	0	0	0	0	0	0	0	0	0	1	2	0	0	0
517	506	3	4	2009	2	0	0	0	0	0	0	0	0	0	0	0	0	0	1	2	0	0	0
518	507	3	4	2009	2	0	0	0	0	0	0	0	0	0	0	0	0	0	1	2	0	0	0
519	508	3	4	2009	2	0	0	0	0	0	0	0	0	0	0	0	0	0	1	2	0	0	0
520	509	3	5	2009	2	1	0	0	0	0	0	2	0	0	0	3	2	2	2	2	1	2	1
521	510	3	5	2009	2	1	0	0	0	0	0	1	0	0	0	2	2	2	2	2	0	0	1
522	511	3	5	2009	2	0	1	0	0	0	0	1	0	0	0	2	2	2	2	2	1	2	1
523	512	3	5	2009	2	4	0	0	0	0	0	1	0	0	0	5	2	2	2	2	1	2	1
524	513	3	5	2009	2	4	0	0	0	0	0	1	0	0	0	5	2	2	2	2	1	2	1
525	514	3	5	2009	2	3	0	0	0	0	0	1	0	0	0	4	2	2	2	2	1	2	1
526	515	3	5	2009	2	1	0	0	0	0	0	0	0	0	0	1	1	1	2	2	0	0	1
527	516	3	5	2009	2	0	0	0	0	0	1	0	0	0	0	1	1	1	2	2	0	0	1
528	517	3	5	2009	2	0	0	0	0	0	0	0	0	0	0	0	0	0	2	2	0	0	0
529	518	3	9	2009	2	0	0	0	0	0	0	0	0	0	0	0	0	0	1	2	0	0	0
530	519	3	9	2009	2	0	0	0	0	0	0	0	0	0	0	0	0	0	1	2	0	0	0
531	520	3	9	2009	2	0	0	0	0	0	0	0	0	0	0	0	0	0	1	2	0	0	0
532	521	3	9	2009	2	0	0	0	0	0	0	0	0	0	0	0	0	0	1	2	0	0	0
533	522	3	9	2009	2	0	0	0	0	0	0	0	0	0	0	0	0	0	1	2	0	0	0
534	523	3	9	2009	2	0	0	0	0	0	0	0	0	0	0	0	0	0	1	2	0	0	0
535	524	3	9	2009	2	0	0	0	0	0	0	0	0	0	0	0	0	0	1	2	0	0	0
536	525	3	9	2009	2	0	0	0	0	0	0	0	0	0	0	0	0	0	1	2	0	0	0
537	526	3	9	2009	2	0	0	0	0	0	0	0	0	0	0	0	0	0	1	2	0	0	0
538	527	3	9	2009	2	0	0	0	0	0	0	0	0	0	0	0	0	0	1	2	0	0	0
539	528	3	9	2009	2	0	0	0	0	0	0	0	0	0	0	0	0	0	1	2	0	0	0
540	529	3	9	2009	2	0	0	0	0	0	0	0	0	0	0	0	0	0	1	2	0	0	0
541	530	3	9	2009	2	0	0	0	0	0	0	0	0	0	0	0	0	0	1	2	0	0	0
542	531	3	9	2009	2	0	0	0	0	0	0	0	0	0	0	0	0	0	1	2	0	0	0
543	532	3	9	2009	2	0	0	0	0	0	0	0	0	0	0	0	0	0	2	2	0	0	0
544	533	3	9	2009	2	0	0	0	0	0	0	0	0	0	0	0	0	0	2	2	0	0	0
545	534	3	9	2009	2	0	0	0	0	0	0	0	0	0	0	0	0	0	2	2	0	0	0
546	535	3	9	2009	2	0	0	0	0	0	0	0	0	0	0	0	0	0	2	2	0	0	0
547	536	3	9	2009	2	0	0	0	0	0	0	0	0	0	0	0	0	0	2	2	0	0	0
548	537	3	9	2009	2	0	0	0	0	0	0	0	0	0	0	0	0	0	2	2	0	0	0
549	538	3	10	2009	2	0	2	0	0	0	0	0	0	0	0	2	1	1	2	2	0	0	1
550	539	3	10	2009	2	0	0	0	0	0	0	0	0	0	0	0	0	0	2	2	0	0	0
551	540	3	12	2009	2	0	0	0	0	0	0	0	0	0	0	0	0	0	2	2	0	0	0
552	541	3	12	2009	2	0	0	0	0	0	0	0	0	0	0	0	0	0	2	2	0	0	0
553	542	3	1	2010	2	0	0	0	0	0	0	0	0	0	0	0	0	0	2	2	0	0	0
554	543	3	1	2010	2	0	0	0	0	0	0	0	0	0	0	0	0	0	2	2	0	0	0
555	544	3	1	2010	2	0	0	0	0	0	0	0	0	0	0	0	0	0	1	2	0	0	0
556	430	4	10	2008	2	0	0	0	0	0	0	0	0	0	0	0	0	0	2	2	0	0	0
557	431	4	10	2008	2	0	0	0	0	0	0	0	0	0	0	0	0	0	2	2	0	0	0
