# Supplementary material for: Comparing cestode infections and their consequences for host fitness in two sexual branchiopods: alien Artemia franciscana and native A. salina from syntopic-populations
Source: PeerJ. 2015 Jul 2;3:e1073. doi: 10.7717/peerj.1073 (PMC4493677; doi:10.7717/peerj.1073)
Supplement: Supplemental Information 4 — Raw data for comparative infections between A. franciscana from syntopic (pond CX) and single (pond 4) populations. [file peerj-03-1073-s009.xlsx]

## Sheet: AD-AF-single
code	month	year	specie	A FL	A FF	A WS	A BG	A FT	A EA	A AT	A AM	A GS	A GSP	A all/M	SR count	sex	stage		PRESENCE	P FL	P FF	P WS	P BG	P FT	P EA	P AT	P AM	P GS	P GSP	INTENSITY	I FL	I FF	I WS	I BG	I FT	I EA	I AT	I AM	I GS	I GSP
1	1	2009	1	0	0	0	0	0	0	0	0	0	1	1	1	1	1		1	0	0	0	0	0	0	0	0	0	1	1										1
1	1	2009	1	0	0	0	0	0	1	0	0	0	0	1	1	1	1		1	0	0	0	0	0	1	0	0	0	0	1						1
1	1	2009	1	0	0	0	0	0	0	0	0	1	0	1	1	1	1		1	0	0	0	0	0	0	0	0	1	0	1									1
1	1	2009	1	0	0	0	0	0	0	0	0	0	1	1	1	2	1		1	0	0	0	0	0	0	0	0	0	1	1										1
1	1	2009	1	0	0	0	0	0	1	0	0	0	0	1	1	1	1		1	0	0	0	0	0	1	0	0	0	0	1						1
1	1	2009	1	1	0	0	0	0	0	0	0	0	0	1	1	1	1		1	1	0	0	0	0	0	0	0	0	0	1	1
1	1	2009	1	0	0	0	0	0	1	0	0	0	0	1	1	1	1		1	0	0	0	0	0	1	0	0	0	0	1						1
1	1	2009	1	0	0	0	0	0	0	0	0	0	1	1	1	1	1		1	0	0	0	0	0	0	0	0	0	1	1										1
1	1	2009	1	0	0	0	0	0	0	0	0	0	1	1	1	1	1		1	0	0	0	0	0	0	0	0	0	1	1										1
1	1	2009	1	0	0	0	0	0	1	0	0	0	0	1	1	1	1		1	0	0	0	0	0	1	0	0	0	0	1						1
1	1	2009	1	0	1	0	0	0	0	0	0	0	0	1	1	1	1		1	0	1	0	0	0	0	0	0	0	0	1		1
1	1	2009	1	0	2	0	0	0	0	0	0	0	0	2	1	1	1		1	0	1	0	0	0	0	0	0	0	0	2		2
1	1	2009	1	0	1	0	0	0	0	0	0	0	0	1	1	1	1		1	0	1	0	0	0	0	0	0	0	0	1		1
1	1	2009	1	0	0	0	0	0	1	0	0	0	0	1	1	1	1		1	0	0	0	0	0	1	0	0	0	0	1						1
1	1	2009	1	0	0	0	0	0	1	0	0	0	0	1	1	1	1		1	0	0	0	0	0	1	0	0	0	0	1						1
1	1	2009	1	1	0	0	0	0	0	0	0	0	0	1	1	2	1		1	1	0	0	0	0	0	0	0	0	0	1	1
1	1	2009	1	0	0	0	0	0	1	0	0	0	0	1	1	2	1		1	0	0	0	0	0	1	0	0	0	0	1						1
1	1	2009	1	0	0	0	0	0	1	0	0	0	0	1	1	2	1		1	0	0	0	0	0	1	0	0	0	0	1						1
1	1	2009	1	0	0	0	0	0	1	0	0	0	0	1	1	1	1		1	0	0	0	0	0	1	0	0	0	0	1						1
1	1	2009	1	0	0	0	0	0	0	0	0	1	0	1	1	1	1		1	0	0	0	0	0	0	0	0	1	0	1									1
1	1	2009	1	0	1	0	0	0	0	0	0	0	0	1	1	1	1		1	0	1	0	0	0	0	0	0	0	0	1		1
1	1	2009	1	0	0	0	0	0	0	0	0	0	1	1	1	1	1		1	0	0	0	0	0	0	0	0	0	1	1										1
1	1	2009	1	1	0	0	0	0	0	0	0	0	0	1	1	1	1		1	1	0	0	0	0	0	0	0	0	0	1	1
1	1	2009	1	0	0	0	0	0	1	0	0	0	0	1	1	1	1		1	0	0	0	0	0	1	0	0	0	0	1						1
1	1	2009	1	0	0	0	0	0	1	0	0	0	0	1	1	1	1		1	0	0	0	0	0	1	0	0	0	0	1						1
1	1	2009	1	0	0	0	0	0	1	0	0	0	0	1	1	1	1		1	0	0	0	0	0	1	0	0	0	0	1						1
1	1	2009	1	0	0	0	0	0	1	0	0	0	0	1	1	1	1		1	0	0	0	0	0	1	0	0	0	0	1						1
1	1	2009	1	0	1	0	0	0	0	0	0	0	0	1	1	1	1		1	0	1	0	0	0	0	0	0	0	0	1		1
1	1	2009	1	0	0	0	0	1	0	0	0	0	0	1	1	2	1		1	0	0	0	0	1	0	0	0	0	0	1					1
1	1	2009	1	0	0	0	0	1	0	0	0	0	0	1	1	2	1		1	0	0	0	0	1	0	0	0	0	0	1					1
1	1	2009	1	0	0	0	0	0	1	0	0	0	0	1	1	2	1		1	0	0	0	0	0	1	0	0	0	0	1						1
1	1	2009	1	0	0	0	0	0	1	0	0	0	0	1	1	2	1		1	0	0	0	0	0	1	0	0	0	0	1						1
1	1	2009	1	0	1	0	0	0	0	0	0	0	0	1	1	2	1		1	0	1	0	0	0	0	0	0	0	0	1		1
1	1	2009	1	0	0	0	0	0	0	0	0	1	0	1	1	2	1		1	0	0	0	0	0	0	0	0	1	0	1									1
1	1	2009	1	0	0	0	0	0	1	0	0	0	0	1	1	2	1		1	0	0	0	0	0	1	0	0	0	0	1						1
1	1	2009	1	0	1	0	0	0	0	0	0	0	0	1	1	2	1		1	0	1	0	0	0	0	0	0	0	0	1		1
1	1	2009	1	0	0	0	0	0	0	0	0	0	0	0	0	2	1		0	0	0	0	0	0	0	0	0	0	0
1	1	2009	1	0	0	0	0	0	0	0	0	0	0	0	0	2	1		0	0	0	0	0	0	0	0	0	0	0
1	1	2009	1	0	0	0	0	0	0	0	0	0	0	0	0	2	1		0	0	0	0	0	0	0	0	0	0	0
1	1	2009	1	0	0	0	0	0	0	0	0	0	0	0	0	2	1		0	0	0	0	0	0	0	0	0	0	0
1	1	2009	1	0	0	0	0	0	0	0	0	0	0	0	0	2	1		0	0	0	0	0	0	0	0	0	0	0
1	1	2009	1	0	0	0	0	0	0	0	0	0	0	0	0	2	1		0	0	0	0	0	0	0	0	0	0	0
1	1	2009	1	0	0	0	0	0	0	0	0	0	0	0	0	2	1		0	0	0	0	0	0	0	0	0	0	0
1	1	2009	1	0	0	0	0	0	0	0	0	0	0	0	0	2	1		0	0	0	0	0	0	0	0	0	0	0
1	1	2009	1	0	0	0	0	0	0	0	0	0	0	0	0	2	1		0	0	0	0	0	0	0	0	0	0	0
1	1	2009	1	0	0	0	0	0	0	0	0	0	0	0	0	2	1		0	0	0	0	0	0	0	0	0	0	0
1	1	2009	1	0	0	0	0	0	0	0	0	0	0	0	0	2	1		0	0	0	0	0	0	0	0	0	0	0
1	1	2009	1	0	0	0	0	0	0	0	0	0	0	0	0	2	1		0	0	0	0	0	0	0	0	0	0	0
1	1	2009	1	0	0	0	0	0	0	0	0	0	0	0	0	2	1		0	0	0	0	0	0	0	0	0	0	0
1	1	2009	1	0	0	0	0	0	0	0	0	0	0	0	0	2	1		0	0	0	0	0	0	0	0	0	0	0
1	1	2009	1	0	0	0	0	0	0	0	0	0	0	0	0	2	1		0	0	0	0	0	0	0	0	0	0	0
1	1	2009	1	0	0	0	0	0	0	0	0	0	0	0	0	2	1		0	0	0	0	0	0	0	0	0	0	0
1	1	2009	1	0	0	0	0	0	0	0	0	0	0	0	0	2	1		0	0	0	0	0	0	0	0	0	0	0
1	1	2009	1	0	0	0	0	0	0	0	0	0	0	0	0	2	1		0	0	0	0	0	0	0	0	0	0	0
1	1	2009	1	0	0	0	0	0	0	0	0	0	0	0	0	2	1		0	0	0	0	0	0	0	0	0	0	0
1	1	2009	1	0	0	0	0	0	0	0	0	0	0	0	0	2	1		0	0	0	0	0	0	0	0	0	0	0
1	1	2009	1	0	0	0	0	0	0	0	0	0	0	0	0	2	1		0	0	0	0	0	0	0	0	0	0	0
1	1	2009	1	0	0	0	0	0	0	0	0	0	0	0	0	2	1		0	0	0	0	0	0	0	0	0	0	0
1	1	2009	1	0	0	0	0	0	0	0	0	0	0	0	0	2	1		0	0	0	0	0	0	0	0	0	0	0
1	1	2009	1	0	0	0	0	0	0	0	0	0	0	0	0	2	1		0	0	0	0	0	0	0	0	0	0	0
1	1	2009	1	0	0	0	0	0	0	0	0	0	0	0	0	2	1		0	0	0	0	0	0	0	0	0	0	0
1	1	2009	1	0	0	0	0	0	0	0	0	0	0	0	0	2	1		0	0	0	0	0	0	0	0	0	0	0
1	1	2009	1	0	0	0	0	0	0	0	0	0	0	0	0	2	1		0	0	0	0	0	0	0	0	0	0	0
1	1	2009	1	0	0	0	0	0	0	0	0	0	0	0	0	2	1		0	0	0	0	0	0	0	0	0	0	0
1	1	2009	1	0	0	0	0	0	0	0	0	0	0	0	0	2	1		0	0	0	0	0	0	0	0	0	0	0
1	1	2009	1	0	0	0	0	0	0	0	0	0	0	0	0	2	1		0	0	0	0	0	0	0	0	0	0	0
1	1	2009	1	0	0	0	0	0	0	0	0	0	0	0	0	2	1		0	0	0	0	0	0	0	0	0	0	0
1	1	2009	1	0	0	0	0	0	0	0	0	0	0	0	0	2	1		0	0	0	0	0	0	0	0	0	0	0
1	1	2009	1	0	0	0	0	0	0	0	0	0	0	0	0	2	1		0	0	0	0	0	0	0	0	0	0	0
1	1	2009	1	0	0	0	0	0	0	0	0	0	0	0	0	2	1		0	0	0	0	0	0	0	0	0	0	0
1	1	2009	1	0	0	0	0	0	0	0	0	0	0	0	0	2	1		0	0	0	0	0	0	0	0	0	0	0
1	1	2009	1	0	0	0	0	0	0	0	0	0	0	0	0	2	1		0	0	0	0	0	0	0	0	0	0	0
1	1	2009	1	0	0	0	0	0	0	0	0	0	0	0	0	2	1		0	0	0	0	0	0	0	0	0	0	0
1	1	2009	1	0	0	0	0	0	0	0	0	0	0	0	0	2	1		0	0	0	0	0	0	0	0	0	0	0
1	1	2009	1	0	0	0	0	0	0	0	0	0	0	0	0	2	1		0	0	0	0	0	0	0	0	0	0	0
1	1	2009	1	0	0	0	0	0	0	0	0	0	0	0	0	2	1		0	0	0	0	0	0	0	0	0	0	0
1	1	2009	1	0	0	0	0	0	0	0	0	0	0	0	0	2	1		0	0	0	0	0	0	0	0	0	0	0
1	1	2009	1	0	0	0	0	0	0	0	0	0	0	0	0	2	1		0	0	0	0	0	0	0	0	0	0	0
1	1	2009	1	0	0	0	0	0	0	0	0	0	0	0	0	2	1		0	0	0	0	0	0	0	0	0	0	0
1	1	2009	1	0	0	0	0	0	0	0	0	0	0	0	0	2	1		0	0	0	0	0	0	0	0	0	0	0
1	1	2009	1	0	0	0	0	0	0	0	0	0	0	0	0	2	1		0	0	0	0	0	0	0	0	0	0	0
1	1	2009	1	0	0	0	0	0	0	0	0	0	0	0	0	2	1		0	0	0	0	0	0	0	0	0	0	0
1	1	2009	1	0	0	0	0	0	0	0	0	0	0	0	0	2	1		0	0	0	0	0	0	0	0	0	0	0
1	1	2009	1	0	0	0	0	0	0	0	0	0	0	0	0	2	1		0	0	0	0	0	0	0	0	0	0	0
1	1	2009	1	0	0	0	0	0	0	0	0	0	0	0	0	2	1		0	0	0	0	0	0	0	0	0	0	0
1	1	2009	1	0	0	0	0	0	0	0	0	0	0	0	0	2	1		0	0	0	0	0	0	0	0	0	0	0
1	1	2009	1	0	0	0	0	0	0	0	0	0	0	0	0	2	1		0	0	0	0	0	0	0	0	0	0	0
1	1	2009	1	0	0	0	0	0	0	0	0	0	0	0	0	2	1		0	0	0	0	0	0	0	0	0	0	0
1	1	2009	1	0	0	0	0	0	0	0	0	0	0	0	0	2	1		0	0	0	0	0	0	0	0	0	0	0
1	1	2009	1	0	0	0	0	0	0	0	0	0	0	0	0	2	1		0	0	0	0	0	0	0	0	0	0	0
1	1	2009	1	0	0	0	0	0	0	0	0	0	0	0	0	2	1		0	0	0	0	0	0	0	0	0	0	0
1	1	2009	1	0	0	0	0	0	0	0	0	0	0	0	0	2	1		0	0	0	0	0	0	0	0	0	0	0
1	1	2009	1	0	0	0	0	0	0	0	0	0	0	0	0	2	1		0	0	0	0	0	0	0	0	0	0	0
1	1	2009	1	0	0	0	0	0	0	0	0	0	0	0	0	2	1		0	0	0	0	0	0	0	0	0	0	0
1	1	2009	1	0	0	0	0	0	0	0	0	0	0	0	0	2	1		0	0	0	0	0	0	0	0	0	0	0
1	1	2009	1	0	0	0	0	0	0	0	0	0	0	0	0	2	1		0	0	0	0	0	0	0	0	0	0	0
1	1	2009	1	0	0	0	0	0	0	0	0	0	0	0	0	2	1		0	0	0	0	0	0	0	0	0	0	0
1	1	2009	1	0	0	0	0	0	0	0	0	0	0	0	0	2	1		0	0	0	0	0	0	0	0	0	0	0
1	1	2009	1	0	0	0	0	0	0	0	0	0	0	0	0	2	1		0	0	0	0	0	0	0	0	0	0	0
1	1	2009	1	0	0	0	0	0	0	0	0	0	0	0	0	2	1		0	0	0	0	0	0	0	0	0	0	0
1	1	2009	1	0	0	0	0	0	0	0	0	0	0	0	0	2	1		0	0	0	0	0	0	0	0	0	0	0
1	1	2009	1	0	0	0	0	0	0	0	0	0	0	0	0	2	1		0	0	0	0	0	0	0	0	0	0	0
1	1	2009	1	0	0	0	0	0	0	0	0	0	0	0	0	2	1		0	0	0	0	0	0	0	0	0	0	0
1	1	2009	1	0	0	0	0	0	0	0	0	0	0	0	0	2	1		0	0	0	0	0	0	0	0	0	0	0
1	1	2009	1	0	0	0	0	0	0	0	0	0	0	0	0	2	1		0	0	0	0	0	0	0	0	0	0	0
1	1	2009	1	0	0	0	0	0	0	0	0	0	0	0	0	2	1		0	0	0	0	0	0	0	0	0	0	0
1	1	2009	1	0	0	0	0	0	0	0	0	0	0	0	0	2	1		0	0	0	0	0	0	0	0	0	0	0
1	1	2009	1	0	0	0	0	0	0	0	0	0	0	0	0	2	1		0	0	0	0	0	0	0	0	0	0	0
1	1	2009	1	0	0	0	0	0	0	0	0	0	0	0	0	2	1		0	0	0	0	0	0	0	0	0	0	0
1	1	2009	1	0	0	0	0	0	0	0	0	0	0	0	0	2	1		0	0	0	0	0	0	0	0	0	0	0
1	1	2009	1	0	0	0	0	0	0	0	0	0	0	0	0	2	1		0	0	0	0	0	0	0	0	0	0	0
1	1	2009	1	0	0	0	0	0	0	0	0	0	0	0	0	2	1		0	0	0	0	0	0	0	0	0	0	0
1	1	2009	1	0	0	0	0	0	0	0	0	0	0	0	0	2	1		0	0	0	0	0	0	0	0	0	0	0
1	1	2009	1	0	0	0	0	0	0	0	0	0	0	0	0	2	1		0	0	0	0	0	0	0	0	0	0	0
1	1	2009	1	0	0	0	0	0	0	0	0	0	0	0	0	2	1		0	0	0	0	0	0	0	0	0	0	0
1	1	2009	1	0	0	0	0	0	0	0	0	0	0	0	0	2	1		0	0	0	0	0	0	0	0	0	0	0
1	1	2009	1	0	0	0	0	0	0	0	0	0	0	0	0	2	1		0	0	0	0	0	0	0	0	0	0	0
1	1	2009	1	0	0	0	0	0	0	0	0	0	0	0	0	2	1		0	0	0	0	0	0	0	0	0	0	0
1	1	2009	1	0	0	0	0	0	0	0	0	0	0	0	0	2	1		0	0	0	0	0	0	0	0	0	0	0
1	1	2009	1	0	0	0	0	0	0	0	0	0	0	0	0	2	1		0	0	0	0	0	0	0	0	0	0	0
1	1	2009	1	0	0	0	0	0	0	0	0	0	0	0	0	2	1		0	0	0	0	0	0	0	0	0	0	0
1	1	2009	1	0	0	0	0	0	0	0	0	0	0	0	0	2	1		0	0	0	0	0	0	0	0	0	0	0
1	1	2009	1	0	0	0	0	0	0	0	0	0	0	0	0	2	1		0	0	0	0	0	0	0	0	0	0	0
1	1	2009	1	0	0	0	0	0	0	0	0	0	0	0	0	2	1		0	0	0	0	0	0	0	0	0	0	0
1	1	2009	1	0	0	0	0	0	0	0	0	0	0	0	0	2	1		0	0	0	0	0	0	0	0	0	0	0
1	1	2009	1	0	0	0	0	0	0	0	0	0	0	0	0	2	1		0	0	0	0	0	0	0	0	0	0	0
1	1	2009	1	0	0	0	0	0	0	0	0	0	0	0	0	2	1		0	0	0	0	0	0	0	0	0	0	0
1	1	2009	1	0	0	0	0	0	0	0	0	0	0	0	0	2	1		0	0	0	0	0	0	0	0	0	0	0
1	1	2009	1	0	0	0	0	0	0	0	0	0	0	0	0	2	1		0	0	0	0	0	0	0	0	0	0	0
1	1	2009	1	0	0	0	0	0	0	0	0	0	0	0	0	2	1		0	0	0	0	0	0	0	0	0	0	0
1	1	2009	1	0	0	0	0	0	0	0	0	0	0	0	0	2	1		0	0	0	0	0	0	0	0	0	0	0
1	1	2009	1	0	0	0	0	0	0	0	0	0	0	0	0	2	1		0	0	0	0	0	0	0	0	0	0	0
1	1	2009	1	0	0	0	0	0	0	0	0	0	0	0	0	2	1		0	0	0	0	0	0	0	0	0	0	0
1	1	2009	1	0	0	0	0	0	0	0	0	0	0	0	0	2	1		0	0	0	0	0	0	0	0	0	0	0
1	1	2009	1	0	0	0	0	0	0	0	0	0	0	0	0	2	1		0	0	0	0	0	0	0	0	0	0	0
1	1	2009	1	0	0	0	0	0	0	0	0	0	0	0	0	2	1		0	0	0	0	0	0	0	0	0	0	0
1	1	2009	1	0	0	0	0	0	0	0	0	0	0	0	0	2	1		0	0	0	0	0	0	0	0	0	0	0
1	1	2009	1	0	0	0	0	0	0	0	0	0	0	0	0	2	1		0	0	0	0	0	0	0	0	0	0	0
1	1	2009	1	0	0	0	0	0	0	0	0	0	0	0	0	2	1		0	0	0	0	0	0	0	0	0	0	0
1	1	2009	1	0	0	0	0	0	0	0	0	0	0	0	0	2	1		0	0	0	0	0	0	0	0	0	0	0
1	1	2009	1	0	0	0	0	0	0	0	0	0	0	0	0	2	1		0	0	0	0	0	0	0	0	0	0	0
1	1	2009	1	0	0	0	0	0	0	0	0	0	0	0	0	2	1		0	0	0	0	0	0	0	0	0	0	0
1	1	2009	1	0	0	0	0	0	0	0	0	0	0	0	0	2	1		0	0	0	0	0	0	0	0	0	0	0
1	1	2009	1	0	0	0	0	0	0	0	0	0	0	0	0	2	1		0	0	0	0	0	0	0	0	0	0	0
1	1	2009	1	0	0	0	0	0	0	0	0	0	0	0	0	2	1		0	0	0	0	0	0	0	0	0	0	0
1	1	2009	1	0	0	0	0	0	0	0	0	0	0	0	0	2	1		0	0	0	0	0	0	0	0	0	0	0
1	1	2009	1	0	0	0	0	0	0	0	0	0	0	0	0	2	1		0	0	0	0	0	0	0	0	0	0	0
1	1	2009	1	0	0	0	0	0	0	0	0	0	0	0	0	2	1		0	0	0	0	0	0	0	0	0	0	0
1	1	2009	1	0	0	0	0	0	0	0	0	0	0	0	0	2	1		0	0	0	0	0	0	0	0	0	0	0
1	1	2009	1	0	0	0	0	0	0	0	0	0	0	0	0	2	1		0	0	0	0	0	0	0	0	0	0	0
1	1	2009	1	0	0	0	0	0	0	0	0	0	0	0	0	2	1		0	0	0	0	0	0	0	0	0	0	0
1	1	2009	1	0	0	0	0	0	0	0	0	0	0	0	0	2	1		0	0	0	0	0	0	0	0	0	0	0
1	1	2009	1	0	0	0	0	0	0	0	0	0	0	0	0	2	1		0	0	0	0	0	0	0	0	0	0	0
1	1	2009	1	0	0	0	0	0	0	0	0	0	0	0	0	2	1		0	0	0	0	0	0	0	0	0	0	0
1	1	2009	1	0	0	0	0	0	0	0	0	0	0	0	0	2	1		0	0	0	0	0	0	0	0	0	0	0
1	1	2009	1	0	0	0	0	0	0	0	0	0	0	0	0	2	1		0	0	0	0	0	0	0	0	0	0	0
1	1	2009	1	0	0	0	0	0	0	0	0	0	0	0	0	2	1		0	0	0	0	0	0	0	0	0	0	0
1	1	2009	1	0	0	0	0	0	0	0	0	0	0	0	0	2	1		0	0	0	0	0	0	0	0	0	0	0
1	1	2009	1	0	0	0	0	0	0	0	0	0	0	0	0	2	1		0	0	0	0	0	0	0	0	0	0	0
1	1	2009	1	0	0	0	0	0	0	0	0	0	0	0	0	2	1		0	0	0	0	0	0	0	0	0	0	0
1	1	2009	1	0	0	0	0	0	0	0	0	0	0	0	0	2	1		0	0	0	0	0	0	0	0	0	0	0
1	1	2009	1	0	0	0	0	0	0	0	0	0	0	0	0	2	1		0	0	0	0	0	0	0	0	0	0	0
1	1	2009	1	0	0	0	0	0	0	0	0	0	0	0	0	2	1		0	0	0	0	0	0	0	0	0	0	0
1	1	2009	1	0	0	0	0	0	0	0	0	0	0	0	0	2	1		0	0	0	0	0	0	0	0	0	0	0
1	1	2009	1	0	0	0	0	0	0	0	0	0	0	0	0	2	1		0	0	0	0	0	0	0	0	0	0	0
1	1	2009	1	0	0	0	0	0	0	0	0	0	0	0	0	2	1		0	0	0	0	0	0	0	0	0	0	0
1	1	2009	1	0	0	0	0	0	0	0	0	0	0	0	0	2	1		0	0	0	0	0	0	0	0	0	0	0
1	1	2009	1	0	0	0	0	0	0	0	0	0	0	0	0	2	1		0	0	0	0	0	0	0	0	0	0	0
1	1	2009	1	0	0	0	0	0	0	0	0	0	0	0	0	2	1		0	0	0	0	0	0	0	0	0	0	0
1	1	2009	1	0	0	0	0	0	0	0	0	0	0	0	0	2	1		0	0	0	0	0	0	0	0	0	0	0
1	1	2009	1	0	0	0	0	0	0	0	0	0	0	0	0	2	1		0	0	0	0	0	0	0	0	0	0	0
1	1	2009	1	0	0	0	0	0	0	0	0	0	0	0	0	2	1		0	0	0	0	0	0	0	0	0	0	0
1	1	2009	1	0	0	0	0	0	0	0	0	0	0	0	0	2	1		0	0	0	0	0	0	0	0	0	0	0
1	1	2009	1	0	0	0	0	0	0	0	0	0	0	0	0	2	1		0	0	0	0	0	0	0	0	0	0	0
1	1	2009	1	0	0	0	0	0	0	0	0	0	0	0	0	2	1		0	0	0	0	0	0	0	0	0	0	0
1	1	2009	1	0	0	0	0	0	0	0	0	0	0	0	0	2	1		0	0	0	0	0	0	0	0	0	0	0
1	1	2009	1	0	0	0	0	0	0	0	0	0	0	0	0	2	1		0	0	0	0	0	0	0	0	0	0	0
1	1	2009	1	0	0	0	0	0	0	0	0	0	0	0	0	2	1		0	0	0	0	0	0	0	0	0	0	0
1	1	2009	1	0	0	0	0	0	0	0	0	0	0	0	0	2	1		0	0	0	0	0	0	0	0	0	0	0
1	1	2009	1	0	0	0	0	0	0	0	0	0	0	0	0	2	1		0	0	0	0	0	0	0	0	0	0	0
1	1	2009	1	0	0	0	0	0	0	0	0	0	0	0	0	2	1		0	0	0	0	0	0	0	0	0	0	0
1	1	2009	1	0	0	0	0	0	0	0	0	0	0	0	0	2	1		0	0	0	0	0	0	0	0	0	0	0
1	1	2009	1	0	0	0	0	0	0	0	0	0	0	0	0	2	1		0	0	0	0	0	0	0	0	0	0	0
1	1	2009	1	0	0	0	0	0	0	0	0	0	0	0	0	2	1		0	0	0	0	0	0	0	0	0	0	0
1	1	2009	1	0	0	0	0	0	0	0	0	0	0	0	0	2	1		0	0	0	0	0	0	0	0	0	0	0
1	1	2009	1	0	0	0	0	0	0	0	0	0	0	0	0	2	1		0	0	0	0	0	0	0	0	0	0	0
1	1	2009	1	0	0	0	0	0	0	0	0	0	0	0	0	2	1		0	0	0	0	0	0	0	0	0	0	0
1	1	2009	1	0	0	0	0	0	0	0	0	0	0	0	0	2	1		0	0	0	0	0	0	0	0	0	0	0
1	1	2009	1	0	0	0	0	0	0	0	0	0	0	0	0	2	1		0	0	0	0	0	0	0	0	0	0	0
1	1	2009	1	0	0	0	0	0	0	0	0	0	0	0	0	2	1		0	0	0	0	0	0	0	0	0	0	0
1	1	2009	1	0	0	0	0	0	0	0	0	0	0	0	0	2	1		0	0	0	0	0	0	0	0	0	0	0
1	1	2009	1	0	0	0	0	0	0	0	0	0	0	0	0	2	1		0	0	0	0	0	0	0	0	0	0	0
1	1	2009	1	0	0	0	0	0	0	0	0	0	0	0	0	2	1		0	0	0	0	0	0	0	0	0	0	0
1	1	2009	1	0	0	0	0	0	0	0	0	0	0	0	0	2	1		0	0	0	0	0	0	0	0	0	0	0
1	1	2009	1	0	0	0	0	0	0	0	0	0	0	0	0	2	1		0	0	0	0	0	0	0	0	0	0	0
1	1	2009	1	0	0	0	0	0	0	0	0	0	0	0	0	2	1		0	0	0	0	0	0	0	0	0	0	0
1	1	2009	1	0	0	0	0	0	0	0	0	0	0	0	0	2	1		0	0	0	0	0	0	0	0	0	0	0
1	1	2009	1	0	0	0	0	0	0	0	0	0	0	0	0	2	1		0	0	0	0	0	0	0	0	0	0	0
1	1	2009	1	0	0	0	0	0	0	0	0	0	0	0	0	2	1		0	0	0	0	0	0	0	0	0	0	0
1	1	2009	1	0	0	0	0	0	0	0	0	0	0	0	0	2	1		0	0	0	0	0	0	0	0	0	0	0
1	1	2009	1	0	0	0	0	0	0	0	0	0	0	0	0	2	1		0	0	0	0	0	0	0	0	0	0	0
1	1	2009	1	0	0	0	0	0	0	0	0	0	0	0	0	2	1		0	0	0	0	0	0	0	0	0	0	0
1	1	2009	1	0	0	0	0	0	0	0	0	0	0	0	0	2	1		0	0	0	0	0	0	0	0	0	0	0
1	1	2009	1	0	0	0	0	0	0	0	0	0	0	0	0	2	1		0	0	0	0	0	0	0	0	0	0	0
1	1	2009	1	0	0	0	0	0	0	0	0	0	0	0	0	2	1		0	0	0	0	0	0	0	0	0	0	0
1	1	2009	1	0	0	0	0	0	0	0	0	0	0	0	0	2	1		0	0	0	0	0	0	0	0	0	0	0
1	1	2009	1	0	0	0	0	0	0	0	0	0	0	0	0	2	1		0	0	0	0	0	0	0	0	0	0	0
1	1	2009	1	0	0	0	0	0	0	0	0	0	0	0	0	2	1		0	0	0	0	0	0	0	0	0	0	0
1	1	2009	1	0	0	0	0	0	0	0	0	0	0	0	0	2	1		0	0	0	0	0	0	0	0	0	0	0
1	1	2009	1	0	0	0	0	0	0	0	0	0	0	0	0	2	1		0	0	0	0	0	0	0	0	0	0	0
1	1	2009	1	0	0	0	0	0	0	0	0	0	0	0	0	2	1		0	0	0	0	0	0	0	0	0	0	0
1	1	2009	1	0	0	0	0	0	0	0	0	0	0	0	0	2	1		0	0	0	0	0	0	0	0	0	0	0
1	1	2009	1	0	0	0	0	0	0	0	0	0	0	0	0	2	1		0	0	0	0	0	0	0	0	0	0	0
1	1	2009	1	0	0	0	0	0	0	0	0	0	0	0	0	2	1		0	0	0	0	0	0	0	0	0	0	0
1	1	2009	1	0	0	0	0	0	0	0	0	0	0	0	0	2	1		0	0	0	0	0	0	0	0	0	0	0
1	1	2009	1	0	0	0	0	0	0	0	0	0	0	0	0	2	1		0	0	0	0	0	0	0	0	0	0	0
1	1	2009	1	0	0	0	0	0	0	0	0	0	0	0	0	2	1		0	0	0	0	0	0	0	0	0	0	0
1	1	2009	1	0	0	0	0	0	0	0	0	0	0	0	0	2	1		0	0	0	0	0	0	0	0	0	0	0
1	1	2009	1	0	0	0	0	0	0	0	0	0	0	0	0	2	1		0	0	0	0	0	0	0	0	0	0	0
1	1	2009	1	0	0	0	0	0	0	0	0	0	0	0	0	2	1		0	0	0	0	0	0	0	0	0	0	0
1	1	2009	1	0	0	0	0	0	0	0	0	0	0	0	0	2	1		0	0	0	0	0	0	0	0	0	0	0
1	1	2009	1	0	0	0	0	0	0	0	0	0	0	0	0	2	1		0	0	0	0	0	0	0	0	0	0	0
1	1	2009	1	0	0	0	0	0	0	0	0	0	0	0	0	2	1		0	0	0	0	0	0	0	0	0	0	0
1	1	2009	1	0	0	0	0	0	0	0	0	0	0	0	0	2	1		0	0	0	0	0	0	0	0	0	0	0
1	1	2009	1	0	0	0	0	0	0	0	0	0	0	0	0	2	1		0	0	0	0	0	0	0	0	0	0	0
1	1	2009	1	0	0	0	0	0	0	0	0	0	0	0	0	2	1		0	0	0	0	0	0	0	0	0	0	0
1	1	2009	1	0	0	0	0	0	0	0	0	0	0	0	0	2	1		0	0	0	0	0	0	0	0	0	0	0
1	1	2009	1	0	0	0	0	0	0	0	0	0	0	0	0	2	1		0	0	0	0	0	0	0	0	0	0	0
1	1	2009	1	0	0	0	0	0	0	0	0	0	0	0	0	2	1		0	0	0	0	0	0	0	0	0	0	0
1	1	2009	1	0	0	0	0	0	0	0	0	0	0	0	0	2	1		0	0	0	0	0	0	0	0	0	0	0
1	1	2009	1	0	0	0	0	0	0	0	0	0	0	0	0	2	1		0	0	0	0	0	0	0	0	0	0	0
1	1	2009	1	0	0	0	0	0	0	0	0	0	0	0	0	2	1		0	0	0	0	0	0	0	0	0	0	0
1	1	2009	1	0	0	0	0	0	0	0	0	0	0	0	0	2	1		0	0	0	0	0	0	0	0	0	0	0
1	1	2009	1	0	0	0	0	0	0	0	0	0	0	0	0	2	1		0	0	0	0	0	0	0	0	0	0	0
1	1	2009	1	0	0	0	0	0	0	0	0	0	0	0	0	2	1		0	0	0	0	0	0	0	0	0	0	0
1	1	2009	1	0	0	0	0	0	0	0	0	0	0	0	0	2	1		0	0	0	0	0	0	0	0	0	0	0
1	1	2009	1	0	0	0	0	0	0	0	0	0	0	0	0	2	1		0	0	0	0	0	0	0	0	0	0	0
1	1	2009	1	0	0	0	0	0	0	0	0	0	0	0	0	2	1		0	0	0	0	0	0	0	0	0	0	0
1	1	2009	1	0	0	0	0	0	0	0	0	0	0	0	0	2	1		0	0	0	0	0	0	0	0	0	0	0
1	1	2009	1	0	0	0	0	0	0	0	0	0	0	0	0	2	1		0	0	0	0	0	0	0	0	0	0	0
1	1	2009	1	0	0	0	0	0	0	0	0	0	0	0	0	2	1		0	0	0	0	0	0	0	0	0	0	0
1	1	2009	1	0	0	0	0	0	0	0	0	0	0	0	0	2	1		0	0	0	0	0	0	0	0	0	0	0
1	1	2009	1	0	0	0	0	0	0	0	0	0	0	0	0	2	1		0	0	0	0	0	0	0	0	0	0	0
1	1	2009	1	0	0	0	0	0	0	0	0	0	0	0	0	2	1		0	0	0	0	0	0	0	0	0	0	0
1	1	2009	1	0	0	0	0	0	0	0	0	0	0	0	0	2	1		0	0	0	0	0	0	0	0	0	0	0
1	1	2009	1	0	0	0	0	0	0	0	0	0	0	0	0	2	1		0	0	0	0	0	0	0	0	0	0	0
1	1	2009	1	0	0	0	0	0	0	0	0	0	0	0	0	2	1		0	0	0	0	0	0	0	0	0	0	0
1	1	2009	1	0	0	0	0	0	0	0	0	0	0	0	0	2	1		0	0	0	0	0	0	0	0	0	0	0
1	1	2009	1	0	0	0	0	0	0	0	0	0	0	0	0	2	1		0	0	0	0	0	0	0	0	0	0	0
1	1	2009	1	0	0	0	0	0	0	0	0	0	0	0	0	2	1		0	0	0	0	0	0	0	0	0	0	0
1	1	2009	1	0	0	0	0	0	0	0	0	0	0	0	0	2	1		0	0	0	0	0	0	0	0	0	0	0
1	1	2009	1	0	0	0	0	0	0	0	0	0	0	0	0	2	1		0	0	0	0	0	0	0	0	0	0	0
1	1	2009	1	0	0	0	0	0	0	0	0	0	0	0	0	2	1		0	0	0	0	0	0	0	0	0	0	0
1	1	2009	1	0	0	0	0	0	0	0	0	0	0	0	0	2	1		0	0	0	0	0	0	0	0	0	0	0
1	1	2009	1	0	0	0	0	0	0	0	0	0	0	0	0	2	1		0	0	0	0	0	0	0	0	0	0	0
1	1	2009	1	0	0	0	0	0	0	0	0	0	0	0	0	2	1		0	0	0	0	0	0	0	0	0	0	0
1	1	2009	1	0	0	0	0	0	0	0	0	0	0	0	0	2	1		0	0	0	0	0	0	0	0	0	0	0
1	1	2009	1	0	0	0	0	0	0	0	0	0	0	0	0	2	1		0	0	0	0	0	0	0	0	0	0	0
1	1	2009	1	0	0	0	0	0	0	0	0	0	0	0	0	2	1		0	0	0	0	0	0	0	0	0	0	0
1	1	2009	1	0	0	0	0	0	0	0	0	0	0	0	0	2	1		0	0	0	0	0	0	0	0	0	0	0
1	1	2009	1	0	0	0	0	0	0	0	0	0	0	0	0	2	1		0	0	0	0	0	0	0	0	0	0	0
1	1	2009	1	0	0	0	0	0	0	0	0	0	0	0	0	2	1		0	0	0	0	0	0	0	0	0	0	0
1	1	2009	1	0	0	0	0	0	0	0	0	0	0	0	0	2	1		0	0	0	0	0	0	0	0	0	0	0
1	1	2009	1	0	0	0	0	0	0	0	0	0	0	0	0	2	1		0	0	0	0	0	0	0	0	0	0	0
1	1	2009	1	0	0	0	0	0	0	0	0	0	0	0	0	2	1		0	0	0	0	0	0	0	0	0	0	0
1	1	2009	1	0	0	0	0	0	0	0	0	0	0	0	0	2	1		0	0	0	0	0	0	0	0	0	0	0
1	1	2009	1	0	0	0	0	0	0	0	0	0	0	0	0	2	1		0	0	0	0	0	0	0	0	0	0	0
1	1	2009	1	0	0	0	0	0	0	0	0	0	0	0	0	2	1		0	0	0	0	0	0	0	0	0	0	0
1	1	2009	1	0	0	0	0	0	0	0	0	0	0	0	0	2	1		0	0	0	0	0	0	0	0	0	0	0
1	1	2009	1	0	0	0	0	0	0	0	0	0	0	0	0	2	1		0	0	0	0	0	0	0	0	0	0	0
1	1	2009	1	0	0	0	0	0	0	0	0	0	0	0	0	2	1		0	0	0	0	0	0	0	0	0	0	0
1	1	2009	1	0	0	0	0	0	0	0	0	0	0	0	0	2	1		0	0	0	0	0	0	0	0	0	0	0
1	1	2009	1	0	0	0	0	0	0	0	0	0	0	0	0	2	1		0	0	0	0	0	0	0	0	0	0	0
1	1	2009	1	0	0	0	0	0	0	0	0	0	0	0	0	2	1		0	0	0	0	0	0	0	0	0	0	0
1	1	2009	1	0	0	0	0	0	0	0	0	0	0	0	0	2	1		0	0	0	0	0	0	0	0	0	0	0
1	1	2009	1	0	0	0	0	0	0	0	0	0	0	0	0	2	1		0	0	0	0	0	0	0	0	0	0	0
1	1	2009	1	0	0	0	0	0	0	0	0	0	0	0	0	2	1		0	0	0	0	0	0	0	0	0	0	0
1	1	2009	1	0	0	0	0	0	0	0	0	0	0	0	0	2	1		0	0	0	0	0	0	0	0	0	0	0
1	1	2009	1	0	0	0	0	0	0	0	0	0	0	0	0	2	1		0	0	0	0	0	0	0	0	0	0	0
1	1	2009	1	0	0	0	0	0	0	0	0	0	0	0	0	2	1		0	0	0	0	0	0	0	0	0	0	0
1	1	2009	1	0	0	0	0	0	0	0	0	0	0	0	0	2	1		0	0	0	0	0	0	0	0	0	0	0
1	1	2009	1	0	0	0	0	0	0	0	0	0	0	0	0	2	1		0	0	0	0	0	0	0	0	0	0	0
1	1	2009	1	0	0	0	0	0	0	0	0	0	0	0	0	2	1		0	0	0	0	0	0	0	0	0	0	0
1	1	2009	1	0	0	0	0	0	0	0	0	0	0	0	0	2	1		0	0	0	0	0	0	0	0	0	0	0
1	1	2009	1	0	0	0	0	0	0	0	0	0	0	0	0	2	1		0	0	0	0	0	0	0	0	0	0	0
1	1	2009	1	0	0	0	0	0	0	0	0	0	0	0	0	2	1		0	0	0	0	0	0	0	0	0	0	0
1	1	2009	1	0	0	0	0	0	0	0	0	0	0	0	0	2	1		0	0	0	0	0	0	0	0	0	0	0
1	1	2009	1	0	0	0	0	0	0	0	0	0	0	0	0	2	1		0	0	0	0	0	0	0	0	0	0	0
1	1	2009	1	0	0	0	0	0	0	0	0	0	0	0	0	2	1		0	0	0	0	0	0	0	0	0	0	0
1	1	2009	1	0	0	0	0	0	0	0	0	0	0	0	0	2	1		0	0	0	0	0	0	0	0	0	0	0
1	1	2009	1	0	0	0	0	0	0	0	0	0	0	0	0	2	1		0	0	0	0	0	0	0	0	0	0	0
1	1	2009	1	0	0	0	0	0	0	0	0	0	0	0	0	2	1		0	0	0	0	0	0	0	0	0	0	0
1	1	2009	1	0	0	0	0	0	0	0	0	0	0	0	0	2	1		0	0	0	0	0	0	0	0	0	0	0
1	1	2009	1	0	0	0	0	0	0	0	0	0	0	0	0	2	1		0	0	0	0	0	0	0	0	0	0	0
1	1	2009	1	0	0	0	0	0	0	0	0	0	0	0	0	2	1		0	0	0	0	0	0	0	0	0	0	0
1	1	2009	1	0	0	0	0	0	0	0	0	0	0	0	0	2	1		0	0	0	0	0	0	0	0	0	0	0
1	1	2009	1	0	0	0	0	0	0	0	0	0	0	0	0	2	1		0	0	0	0	0	0	0	0	0	0	0
1	1	2009	1	0	0	0	0	0	0	0	0	0	0	0	0	2	1		0	0	0	0	0	0	0	0	0	0	0
1	1	2009	1	0	0	0	0	0	0	0	0	0	0	0	0	2	1		0	0	0	0	0	0	0	0	0	0	0
1	1	2009	1	0	0	0	0	0	0	0	0	0	0	0	0	2	1		0	0	0	0	0	0	0	0	0	0	0
1	1	2009	1	0	0	0	0	0	0	0	0	0	0	0	0	2	1		0	0	0	0	0	0	0	0	0	0	0
1	1	2009	1	0	0	0	0	0	0	0	0	0	0	0	0	2	1		0	0	0	0	0	0	0	0	0	0	0
1	1	2009	1	0	0	0	0	0	0	0	0	0	0	0	0	2	1		0	0	0	0	0	0	0	0	0	0	0
1	1	2009	1	0	0	0	0	0	0	0	0	0	0	0	0	2	1		0	0	0	0	0	0	0	0	0	0	0
1	1	2009	1	0	0	0	0	0	0	0	0	0	0	0	0	2	1		0	0	0	0	0	0	0	0	0	0	0
1	1	2009	1	0	0	0	0	0	0	0	0	0	0	0	0	2	1		0	0	0	0	0	0	0	0	0	0	0
1	1	2009	1	0	0	0	0	0	0	0	0	0	0	0	0	2	1		0	0	0	0	0	0	0	0	0	0	0
1	1	2009	1	0	0	0	0	0	0	0	0	0	0	0	0	2	1		0	0	0	0	0	0	0	0	0	0	0
1	1	2009	1	0	0	0	0	0	0	0	0	0	0	0	0	2	1		0	0	0	0	0	0	0	0	0	0	0
1	1	2009	1	0	0	0	0	0	0	0	0	0	0	0	0	2	1		0	0	0	0	0	0	0	0	0	0	0
1	1	2009	1	0	0	0	0	0	0	0	0	0	0	0	0	2	1		0	0	0	0	0	0	0	0	0	0	0
1	1	2009	1	0	0	0	0	0	0	0	0	0	0	0	0	2	1		0	0	0	0	0	0	0	0	0	0	0
1	1	2009	1	0	0	0	0	0	0	0	0	0	0	0	0	2	1		0	0	0	0	0	0	0	0	0	0	0
1	1	2009	1	0	0	0	0	0	0	0	0	0	0	0	0	2	1		0	0	0	0	0	0	0	0	0	0	0
1	1	2009	1	0	0	0	0	0	0	0	0	0	0	0	0	2	1		0	0	0	0	0	0	0	0	0	0	0
1	1	2009	1	0	0	0	0	0	0	0	0	0	0	0	0	2	1		0	0	0	0	0	0	0	0	0	0	0
1	1	2009	1	0	0	0	0	0	0	0	0	0	0	0	0	2	1		0	0	0	0	0	0	0	0	0	0	0
1	1	2009	1	0	0	0	0	0	0	0	0	0	0	0	0	2	1		0	0	0	0	0	0	0	0	0	0	0
1	1	2009	1	0	0	0	0	0	0	0	0	0	0	0	0	2	1		0	0	0	0	0	0	0	0	0	0	0
1	1	2009	1	0	0	0	0	0	0	0	0	0	0	0	0	2	1		0	0	0	0	0	0	0	0	0	0	0
1	1	2009	1	0	0	0	0	0	0	0	0	0	0	0	0	2	1		0	0	0	0	0	0	0	0	0	0	0
1	1	2009	1	0	0	0	0	0	0	0	0	0	0	0	0	2	1		0	0	0	0	0	0	0	0	0	0	0
1	1	2009	1	0	0	0	0	0	0	0	0	0	0	0	0	2	1		0	0	0	0	0	0	0	0	0	0	0
1	1	2009	1	0	0	0	0	0	0	0	0	0	0	0	0	2	1		0	0	0	0	0	0	0	0	0	0	0
1	1	2009	1	0	0	0	0	0	0	0	0	0	0	0	0	2	1		0	0	0	0	0	0	0	0	0	0	0
1	1	2009	1	0	0	0	0	0	0	0	0	0	0	0	0	2	1		0	0	0	0	0	0	0	0	0	0	0
1	1	2009	1	0	0	0	0	0	0	0	0	0	0	0	0	2	1		0	0	0	0	0	0	0	0	0	0	0
1	1	2009	1	0	0	0	0	0	0	0	0	0	0	0	0	2	1		0	0	0	0	0	0	0	0	0	0	0
1	1	2009	1	0	0	0	0	0	0	0	0	0	0	0	0	2	1		0	0	0	0	0	0	0	0	0	0	0
1	1	2009	1	0	0	0	0	0	0	0	0	0	0	0	0	2	1		0	0	0	0	0	0	0	0	0	0	0
1	1	2009	1	0	0	0	0	0	0	0	0	0	0	0	0	2	1		0	0	0	0	0	0	0	0	0	0	0
1	1	2009	1	0	0	0	0	0	0	0	0	0	0	0	0	2	1		0	0	0	0	0	0	0	0	0	0	0
1	1	2009	1	0	0	0	0	0	0	0	0	0	0	0	0	2	1		0	0	0	0	0	0	0	0	0	0	0
1	1	2009	1	0	0	0	0	0	0	0	0	0	0	0	0	2	1		0	0	0	0	0	0	0	0	0	0	0
1	1	2009	1	0	0	0	0	0	0	0	0	0	0	0	0	2	1		0	0	0	0	0	0	0	0	0	0	0
1	1	2009	1	0	0	0	0	0	0	0	0	0	0	0	0	2	1		0	0	0	0	0	0	0	0	0	0	0
1	1	2009	1	0	0	0	0	0	0	0	0	0	0	0	0	2	1		0	0	0	0	0	0	0	0	0	0	0
1	1	2009	1	0	0	0	0	0	0	0	0	0	0	0	0	2	1		0	0	0	0	0	0	0	0	0	0	0
1	1	2009	1	0	0	0	0	0	0	0	0	0	0	0	0	2	1		0	0	0	0	0	0	0	0	0	0	0
1	1	2009	1	0	0	0	0	0	0	0	0	0	0	0	0	2	1		0	0	0	0	0	0	0	0	0	0	0
1	1	2009	1	0	0	0	0	0	0	0	0	0	0	0	0	2	1		0	0	0	0	0	0	0	0	0	0	0
1	1	2009	1	0	0	0	0	0	0	0	0	0	0	0	0	2	1		0	0	0	0	0	0	0	0	0	0	0
1	1	2009	1	0	0	0	0	0	0	0	0	0	0	0	0	2	1		0	0	0	0	0	0	0	0	0	0	0
1	1	2009	1	0	0	0	0	0	0	0	0	0	0	0	0	2	1		0	0	0	0	0	0	0	0	0	0	0
1	1	2009	1	0	0	0	0	0	0	0	0	0	0	0	0	2	1		0	0	0	0	0	0	0	0	0	0	0
1	1	2009	1	0	0	0	0	0	0	0	0	0	0	0	0	2	1		0	0	0	0	0	0	0	0	0	0	0
1	1	2009	1	0	0	0	0	0	0	0	0	0	0	0	0	2	1		0	0	0	0	0	0	0	0	0	0	0
1	1	2009	1	0	0	0	0	0	0	0	0	0	0	0	0	2	1		0	0	0	0	0	0	0	0	0	0	0
1	1	2009	1	0	0	0	0	0	0	0	0	0	0	0	0	2	1		0	0	0	0	0	0	0	0	0	0	0
1	1	2009	1	0	0	0	0	0	0	0	0	0	0	0	0	2	1		0	0	0	0	0	0	0	0	0	0	0
1	1	2009	1	0	0	0	0	0	0	0	0	0	0	0	0	2	1		0	0	0	0	0	0	0	0	0	0	0
1	1	2009	1	0	0	0	0	0	0	0	0	0	0	0	0	2	1		0	0	0	0	0	0	0	0	0	0	0
1	1	2009	1	0	0	0	0	0	0	0	0	0	0	0	0	2	1		0	0	0	0	0	0	0	0	0	0	0
1	1	2009	1	0	0	0	0	0	0	0	0	0	0	0	0	2	1		0	0	0	0	0	0	0	0	0	0	0
1	1	2009	1	0	0	0	0	0	0	0	0	0	0	0	0	2	1		0	0	0	0	0	0	0	0	0	0	0
1	1	2009	1	0	0	0	0	0	0	0	0	0	0	0	0	2	1		0	0	0	0	0	0	0	0	0	0	0
1	1	2009	1	0	0	0	0	0	0	0	0	0	0	0	0	2	1		0	0	0	0	0	0	0	0	0	0	0
1	1	2009	1	0	0	0	0	0	0	0	0	0	0	0	0	2	1		0	0	0	0	0	0	0	0	0	0	0
1	1	2009	1	0	0	0	0	0	0	0	0	0	0	0	0	2	1		0	0	0	0	0	0	0	0	0	0	0
1	1	2009	1	0	0	0	0	0	0	0	0	0	0	0	0	2	1		0	0	0	0	0	0	0	0	0	0	0
1	1	2009	1	0	0	0	0	0	0	0	0	0	0	0	0	2	1		0	0	0	0	0	0	0	0	0	0	0
1	1	2009	1	0	0	0	0	0	0	0	0	0	0	0	0	2	1		0	0	0	0	0	0	0	0	0	0	0
1	1	2009	1	0	0	0	0	0	0	0	0	0	0	0	0	2	1		0	0	0	0	0	0	0	0	0	0	0
1	1	2009	1	0	0	0	0	0	0	0	0	0	0	0	0	2	1		0	0	0	0	0	0	0	0	0	0	0
1	1	2009	1	0	0	0	0	0	0	0	0	0	0	0	0	2	1		0	0	0	0	0	0	0	0	0	0	0
1	1	2009	1	0	0	0	0	0	0	0	0	0	0	0	0	2	1		0	0	0	0	0	0	0	0	0	0	0
1	1	2009	1	0	0	0	0	0	0	0	0	0	0	0	0	2	1		0	0	0	0	0	0	0	0	0	0	0
1	1	2009	1	0	0	0	0	0	0	0	0	0	0	0	0	2	1		0	0	0	0	0	0	0	0	0	0	0
1	1	2009	1	0	0	0	0	0	0	0	0	0	0	0	0	2	1		0	0	0	0	0	0	0	0	0	0	0
1	1	2009	1	0	0	0	0	0	0	0	0	0	0	0	0	2	1		0	0	0	0	0	0	0	0	0	0	0
1	1	2009	1	0	0	0	0	0	0	0	0	0	0	0	0	2	1		0	0	0	0	0	0	0	0	0	0	0
1	1	2009	1	0	0	0	0	0	0	0	0	0	0	0	0	2	1		0	0	0	0	0	0	0	0	0	0	0
1	1	2009	1	0	0	0	0	0	0	0	0	0	0	0	0	2	1		0	0	0	0	0	0	0	0	0	0	0
1	1	2009	1	0	0	0	0	0	0	0	0	0	0	0	0	2	1		0	0	0	0	0	0	0	0	0	0	0
1	1	2009	1	0	0	0	0	0	0	0	0	0	0	0	0	2	1		0	0	0	0	0	0	0	0	0	0	0
1	1	2009	1	0	0	0	0	0	0	0	0	0	0	0	0	2	1		0	0	0	0	0	0	0	0	0	0	0
1	1	2009	1	0	0	0	0	0	0	0	0	0	0	0	0	2	1		0	0	0	0	0	0	0	0	0	0	0
1	1	2009	1	0	0	0	0	0	0	0	0	0	0	0	0	2	1		0	0	0	0	0	0	0	0	0	0	0
1	1	2009	1	0	0	0	0	0	0	0	0	0	0	0	0	2	1		0	0	0	0	0	0	0	0	0	0	0
1	1	2009	1	0	0	0	0	0	0	0	0	0	0	0	0	2	1		0	0	0	0	0	0	0	0	0	0	0
1	1	2009	1	0	0	0	0	0	0	0	0	0	0	0	0	2	1		0	0	0	0	0	0	0	0	0	0	0
1	1	2009	1	0	0	0	0	0	0	0	0	0	0	0	0	2	1		0	0	0	0	0	0	0	0	0	0	0
1	1	2009	1	0	0	0	0	0	0	0	0	0	0	0	0	2	1		0	0	0	0	0	0	0	0	0	0	0
1	1	2009	1	0	0	0	0	0	0	0	0	0	0	0	0	2	1		0	0	0	0	0	0	0	0	0	0	0
1	1	2009	1	0	0	0	0	0	0	0	0	0	0	0	0	2	1		0	0	0	0	0	0	0	0	0	0	0
1	1	2009	1	0	0	0	0	0	0	0	0	0	0	0	0	2	1		0	0	0	0	0	0	0	0	0	0	0
1	1	2009	1	0	0	0	0	0	0	0	0	0	0	0	0	2	1		0	0	0	0	0	0	0	0	0	0	0
1	1	2009	1	0	0	0	0	0	0	0	0	0	0	0	0	2	1		0	0	0	0	0	0	0	0	0	0	0
1	1	2009	1	0	0	0	0	0	0	0	0	0	0	0	0	2	1		0	0	0	0	0	0	0	0	0	0	0
1	1	2009	1	0	0	0	0	0	0	0	0	0	0	0	0	2	1		0	0	0	0	0	0	0	0	0	0	0
1	1	2009	1	0	0	0	0	0	0	0	0	0	0	0	0	2	1		0	0	0	0	0	0	0	0	0	0	0
1	1	2009	1	0	0	0	0	0	0	0	0	0	0	0	0	2	1		0	0	0	0	0	0	0	0	0	0	0
1	1	2009	1	0	0	0	0	0	0	0	0	0	0	0	0	2	1		0	0	0	0	0	0	0	0	0	0	0
1	1	2009	1	0	0	0	0	0	0	0	0	0	0	0	0	2	1		0	0	0	0	0	0	0	0	0	0	0
1	1	2009	1	0	0	0	0	0	0	0	0	0	0	0	0	2	1		0	0	0	0	0	0	0	0	0	0	0
1	1	2009	1	0	0	0	0	0	0	0	0	0	0	0	0	2	1		0	0	0	0	0	0	0	0	0	0	0
1	1	2009	1	0	0	0	0	0	0	0	0	0	0	0	0	2	1		0	0	0	0	0	0	0	0	0	0	0
1	1	2009	1	0	0	0	0	0	0	0	0	0	0	0	0	2	1		0	0	0	0	0	0	0	0	0	0	0
1	1	2009	1	0	0	0	0	0	0	0	0	0	0	0	0	2	1		0	0	0	0	0	0	0	0	0	0	0
1	1	2009	1	0	0	0	0	0	0	0	0	0	0	0	0	2	1		0	0	0	0	0	0	0	0	0	0	0
1	1	2009	1	0	0	0	0	0	0	0	0	0	0	0	0	2	1		0	0	0	0	0	0	0	0	0	0	0
1	1	2009	1	0	0	0	0	0	0	0	0	0	0	0	0	2	1		0	0	0	0	0	0	0	0	0	0	0
1	1	2009	1	0	0	0	0	0	0	0	0	0	0	0	0	2	1		0	0	0	0	0	0	0	0	0	0	0
1	1	2009	1	0	0	0	0	0	0	0	0	0	0	0	0	2	1		0	0	0	0	0	0	0	0	0	0	0
1	1	2009	1	0	0	0	0	0	0	0	0	0	0	0	0	2	1		0	0	0	0	0	0	0	0	0	0	0
1	1	2009	1	0	0	0	0	0	0	0	0	0	0	0	0	2	1		0	0	0	0	0	0	0	0	0	0	0
1	1	2009	1	0	0	0	0	0	0	0	0	0	0	0	0	2	1		0	0	0	0	0	0	0	0	0	0	0
1	1	2009	1	0	0	0	0	0	0	0	0	0	0	0	0	2	1		0	0	0	0	0	0	0	0	0	0	0
1	1	2009	1	0	0	0	0	0	0	0	0	0	0	0	0	2	1		0	0	0	0	0	0	0	0	0	0	0
1	1	2009	1	0	0	0	0	0	0	0	0	0	0	0	0	2	1		0	0	0	0	0	0	0	0	0	0	0
1	1	2009	1	0	0	0	0	0	0	0	0	0	0	0	0	2	1		0	0	0	0	0	0	0	0	0	0	0
1	1	2009	1	0	0	0	0	0	0	0	0	0	0	0	0	2	1		0	0	0	0	0	0	0	0	0	0	0
1	1	2009	1	0	0	0	0	0	0	0	0	0	0	0	0	2	1		0	0	0	0	0	0	0	0	0	0	0
1	1	2009	1	0	0	0	0	0	0	0	0	0	0	0	0	2	1		0	0	0	0	0	0	0	0	0	0	0
1	1	2009	1	0	0	0	0	0	0	0	0	0	0	0	0	2	1		0	0	0	0	0	0	0	0	0	0	0
1	1	2009	1	0	0	0	0	0	0	0	0	0	0	0	0	2	1		0	0	0	0	0	0	0	0	0	0	0
1	1	2009	1	0	0	0	0	0	0	0	0	0	0	0	0	2	1		0	0	0	0	0	0	0	0	0	0	0
1	1	2009	1	0	0	0	0	0	0	0	0	0	0	0	0	2	1		0	0	0	0	0	0	0	0	0	0	0
1	1	2009	1	0	0	0	0	0	0	0	0	0	0	0	0	1	1		0	0	0	0	0	0	0	0	0	0	0
1	1	2009	1	0	0	0	0	0	0	0	0	0	0	0	0	1	1		0	0	0	0	0	0	0	0	0	0	0
1	1	2009	1	0	0	0	0	0	0	0	0	0	0	0	0	1	1		0	0	0	0	0	0	0	0	0	0	0
1	1	2009	1	0	0	0	0	0	0	0	0	0	0	0	0	1	1		0	0	0	0	0	0	0	0	0	0	0
1	1	2009	1	0	0	0	0	0	0	0	0	0	0	0	0	1	1		0	0	0	0	0	0	0	0	0	0	0
1	1	2009	1	0	0	0	0	0	0	0	0	0	0	0	0	1	1		0	0	0	0	0	0	0	0	0	0	0
1	1	2009	1	0	0	0	0	0	0	0	0	0	0	0	0	1	1		0	0	0	0	0	0	0	0	0	0	0
1	1	2009	1	0	0	0	0	0	0	0	0	0	0	0	0	1	1		0	0	0	0	0	0	0	0	0	0	0
1	1	2009	1	0	0	0	0	0	0	0	0	0	0	0	0	1	1		0	0	0	0	0	0	0	0	0	0	0
1	1	2009	1	0	0	0	0	0	0	0	0	0	0	0	0	1	1		0	0	0	0	0	0	0	0	0	0	0
1	1	2009	1	0	0	0	0	0	0	0	0	0	0	0	0	1	1		0	0	0	0	0	0	0	0	0	0	0
1	1	2009	1	0	0	0	0	0	0	0	0	0	0	0	0	1	1		0	0	0	0	0	0	0	0	0	0	0
1	1	2009	1	0	0	0	0	0	0	0	0	0	0	0	0	1	1		0	0	0	0	0	0	0	0	0	0	0
1	1	2009	1	0	0	0	0	0	0	0	0	0	0	0	0	1	1		0	0	0	0	0	0	0	0	0	0	0
1	1	2009	1	0	0	0	0	0	0	0	0	0	0	0	0	1	1		0	0	0	0	0	0	0	0	0	0	0
1	1	2009	1	0	0	0	0	0	0	0	0	0	0	0	0	1	1		0	0	0	0	0	0	0	0	0	0	0
1	1	2009	1	0	0	0	0	0	0	0	0	0	0	0	0	1	1		0	0	0	0	0	0	0	0	0	0	0
1	1	2009	1	0	0	0	0	0	0	0	0	0	0	0	0	1	1		0	0	0	0	0	0	0	0	0	0	0
1	1	2009	1	0	0	0	0	0	0	0	0	0	0	0	0	1	1		0	0	0	0	0	0	0	0	0	0	0
1	1	2009	1	0	0	0	0	0	0	0	0	0	0	0	0	1	1		0	0	0	0	0	0	0	0	0	0	0
1	1	2009	1	0	0	0	0	0	0	0	0	0	0	0	0	1	1		0	0	0	0	0	0	0	0	0	0	0
1	1	2009	1	0	0	0	0	0	0	0	0	0	0	0	0	1	1		0	0	0	0	0	0	0	0	0	0	0
1	1	2009	1	0	0	0	0	0	0	0	0	0	0	0	0	1	1		0	0	0	0	0	0	0	0	0	0	0
1	1	2009	1	0	0	0	0	0	0	0	0	0	0	0	0	1	1		0	0	0	0	0	0	0	0	0	0	0
1	1	2009	1	0	0	0	0	0	0	0	0	0	0	0	0	1	1		0	0	0	0	0	0	0	0	0	0	0
1	1	2009	1	0	0	0	0	0	0	0	0	0	0	0	0	1	1		0	0	0	0	0	0	0	0	0	0	0
1	1	2009	1	0	0	0	0	0	0	0	0	0	0	0	0	1	1		0	0	0	0	0	0	0	0	0	0	0
1	1	2009	1	0	0	0	0	0	0	0	0	0	0	0	0	1	1		0	0	0	0	0	0	0	0	0	0	0
1	1	2009	1	0	0	0	0	0	0	0	0	0	0	0	0	1	1		0	0	0	0	0	0	0	0	0	0	0
1	1	2009	1	0	0	0	0	0	0	0	0	0	0	0	0	1	1		0	0	0	0	0	0	0	0	0	0	0
1	1	2009	1	0	0	0	0	0	0	0	0	0	0	0	0	1	1		0	0	0	0	0	0	0	0	0	0	0
1	1	2009	1	0	0	0	0	0	0	0	0	0	0	0	0	1	1		0	0	0	0	0	0	0	0	0	0	0
1	1	2009	1	0	0	0	0	0	0	0	0	0	0	0	0	1	1		0	0	0	0	0	0	0	0	0	0	0
1	1	2009	1	0	0	0	0	0	0	0	0	0	0	0	0	1	1		0	0	0	0	0	0	0	0	0	0	0
1	1	2009	1	0	0	0	0	0	0	0	0	0	0	0	0	1	1		0	0	0	0	0	0	0	0	0	0	0
1	1	2009	1	0	0	0	0	0	0	0	0	0	0	0	0	1	1		0	0	0	0	0	0	0	0	0	0	0
1	1	2009	1	0	0	0	0	0	0	0	0	0	0	0	0	1	1		0	0	0	0	0	0	0	0	0	0	0
1	1	2009	1	0	0	0	0	0	0	0	0	0	0	0	0	1	1		0	0	0	0	0	0	0	0	0	0	0
1	1	2009	1	0	0	0	0	0	0	0	0	0	0	0	0	1	1		0	0	0	0	0	0	0	0	0	0	0
1	1	2009	1	0	0	0	0	0	0	0	0	0	0	0	0	1	1		0	0	0	0	0	0	0	0	0	0	0
1	1	2009	1	0	0	0	0	0	0	0	0	0	0	0	0	1	1		0	0	0	0	0	0	0	0	0	0	0
1	1	2009	1	0	0	0	0	0	0	0	0	0	0	0	0	1	1		0	0	0	0	0	0	0	0	0	0	0
1	1	2009	1	0	0	0	0	0	0	0	0	0	0	0	0	1	1		0	0	0	0	0	0	0	0	0	0	0
1	1	2009	1	0	0	0	0	0	0	0	0	0	0	0	0	1	1		0	0	0	0	0	0	0	0	0	0	0
1	1	2009	1	0	0	0	0	0	0	0	0	0	0	0	0	1	1		0	0	0	0	0	0	0	0	0	0	0
1	1	2009	1	0	0	0	0	0	0	0	0	0	0	0	0	1	1		0	0	0	0	0	0	0	0	0	0	0
1	1	2009	1	0	0	0	0	0	0	0	0	0	0	0	0	1	1		0	0	0	0	0	0	0	0	0	0	0
1	1	2009	1	0	0	0	0	0	0	0	0	0	0	0	0	1	1		0	0	0	0	0	0	0	0	0	0	0
1	1	2009	1	0	0	0	0	0	0	0	0	0	0	0	0	1	1		0	0	0	0	0	0	0	0	0	0	0
1	1	2009	1	0	0	0	0	0	0	0	0	0	0	0	0	1	1		0	0	0	0	0	0	0	0	0	0	0
1	1	2009	1	0	0	0	0	0	0	0	0	0	0	0	0	1	1		0	0	0	0	0	0	0	0	0	0	0
1	1	2009	1	0	0	0	0	0	0	0	0	0	0	0	0	1	1		0	0	0	0	0	0	0	0	0	0	0
1	1	2009	1	0	0	0	0	0	0	0	0	0	0	0	0	1	1		0	0	0	0	0	0	0	0	0	0	0
1	1	2009	1	0	0	0	0	0	0	0	0	0	0	0	0	1	1		0	0	0	0	0	0	0	0	0	0	0
1	1	2009	1	0	0	0	0	0	0	0	0	0	0	0	0	1	1		0	0	0	0	0	0	0	0	0	0	0
1	1	2009	1	0	0	0	0	0	0	0	0	0	0	0	0	1	1		0	0	0	0	0	0	0	0	0	0	0
1	1	2009	1	0	0	0	0	0	0	0	0	0	0	0	0	1	1		0	0	0	0	0	0	0	0	0	0	0
1	1	2009	1	0	0	0	0	0	0	0	0	0	0	0	0	1	1		0	0	0	0	0	0	0	0	0	0	0
1	1	2009	1	0	0	0	0	0	0	0	0	0	0	0	0	1	1		0	0	0	0	0	0	0	0	0	0	0
1	1	2009	1	0	0	0	0	0	0	0	0	0	0	0	0	1	1		0	0	0	0	0	0	0	0	0	0	0
1	1	2009	1	0	0	0	0	0	0	0	0	0	0	0	0	1	1		0	0	0	0	0	0	0	0	0	0	0
1	1	2009	1	0	0	0	0	0	0	0	0	0	0	0	0	1	1		0	0	0	0	0	0	0	0	0	0	0
1	1	2009	1	0	0	0	0	0	0	0	0	0	0	0	0	1	1		0	0	0	0	0	0	0	0	0	0	0
1	1	2009	1	0	0	0	0	0	0	0	0	0	0	0	0	1	1		0	0	0	0	0	0	0	0	0	0	0
1	1	2009	1	0	0	0	0	0	0	0	0	0	0	0	0	1	1		0	0	0	0	0	0	0	0	0	0	0
1	1	2009	1	0	0	0	0	0	0	0	0	0	0	0	0	1	1		0	0	0	0	0	0	0	0	0	0	0
1	1	2009	1	0	0	0	0	0	0	0	0	0	0	0	0	1	1		0	0	0	0	0	0	0	0	0	0	0
1	1	2009	1	0	0	0	0	0	0	0	0	0	0	0	0	1	1		0	0	0	0	0	0	0	0	0	0	0
1	1	2009	1	0	0	0	0	0	0	0	0	0	0	0	0	1	1		0	0	0	0	0	0	0	0	0	0	0
1	1	2009	1	0	0	0	0	0	0	0	0	0	0	0	0	1	1		0	0	0	0	0	0	0	0	0	0	0
1	1	2009	1	0	0	0	0	0	0	0	0	0	0	0	0	1	1		0	0	0	0	0	0	0	0	0	0	0
1	1	2009	1	0	0	0	0	0	0	0	0	0	0	0	0	1	1		0	0	0	0	0	0	0	0	0	0	0
1	1	2009	1	0	0	0	0	0	0	0	0	0	0	0	0	1	1		0	0	0	0	0	0	0	0	0	0	0
1	1	2009	1	0	0	0	0	0	0	0	0	0	0	0	0	1	1		0	0	0	0	0	0	0	0	0	0	0
1	1	2009	1	0	0	0	0	0	0	0	0	0	0	0	0	1	1		0	0	0	0	0	0	0	0	0	0	0
1	1	2009	1	0	0	0	0	0	0	0	0	0	0	0	0	1	1		0	0	0	0	0	0	0	0	0	0	0
1	1	2009	1	0	0	0	0	0	0	0	0	0	0	0	0	1	1		0	0	0	0	0	0	0	0	0	0	0
1	1	2009	1	0	0	0	0	0	0	0	0	0	0	0	0	1	1		0	0	0	0	0	0	0	0	0	0	0
1	1	2009	1	0	0	0	0	0	0	0	0	0	0	0	0	1	1		0	0	0	0	0	0	0	0	0	0	0
1	1	2009	1	0	0	0	0	0	0	0	0	0	0	0	0	1	1		0	0	0	0	0	0	0	0	0	0	0
1	1	2009	1	0	0	0	0	0	0	0	0	0	0	0	0	1	1		0	0	0	0	0	0	0	0	0	0	0
1	1	2009	1	0	0	0	0	0	0	0	0	0	0	0	0	1	1		0	0	0	0	0	0	0	0	0	0	0
1	1	2009	1	0	0	0	0	0	0	0	0	0	0	0	0	1	1		0	0	0	0	0	0	0	0	0	0	0
1	1	2009	1	0	0	0	0	0	0	0	0	0	0	0	0	1	1		0	0	0	0	0	0	0	0	0	0	0
1	1	2009	1	0	0	0	0	0	0	0	0	0	0	0	0	1	1		0	0	0	0	0	0	0	0	0	0	0
1	1	2009	1	0	0	0	0	0	0	0	0	0	0	0	0	1	1		0	0	0	0	0	0	0	0	0	0	0
1	1	2009	1	0	0	0	0	0	0	0	0	0	0	0	0	1	1		0	0	0	0	0	0	0	0	0	0	0
1	1	2009	1	0	0	0	0	0	0	0	0	0	0	0	0	1	1		0	0	0	0	0	0	0	0	0	0	0
1	1	2009	1	0	0	0	0	0	0	0	0	0	0	0	0	1	1		0	0	0	0	0	0	0	0	0	0	0
1	1	2009	1	0	0	0	0	0	0	0	0	0	0	0	0	1	1		0	0	0	0	0	0	0	0	0	0	0
1	1	2009	1	0	0	0	0	0	0	0	0	0	0	0	0	1	1		0	0	0	0	0	0	0	0	0	0	0
1	1	2009	1	0	0	0	0	0	0	0	0	0	0	0	0	1	1		0	0	0	0	0	0	0	0	0	0	0
1	1	2009	1	0	0	0	0	0	0	0	0	0	0	0	0	1	1		0	0	0	0	0	0	0	0	0	0	0
1	1	2009	1	0	0	0	0	0	0	0	0	0	0	0	0	1	1		0	0	0	0	0	0	0	0	0	0	0
1	1	2009	1	0	0	0	0	0	0	0	0	0	0	0	0	1	1		0	0	0	0	0	0	0	0	0	0	0
1	1	2009	1	0	0	0	0	0	0	0	0	0	0	0	0	1	1		0	0	0	0	0	0	0	0	0	0	0
1	1	2009	1	0	0	0	0	0	0	0	0	0	0	0	0	1	1		0	0	0	0	0	0	0	0	0	0	0
1	1	2009	1	0	0	0	0	0	0	0	0	0	0	0	0	1	1		0	0	0	0	0	0	0	0	0	0	0
1	1	2009	1	0	0	0	0	0	0	0	0	0	0	0	0	1	1		0	0	0	0	0	0	0	0	0	0	0
1	1	2009	1	0	0	0	0	0	0	0	0	0	0	0	0	1	1		0	0	0	0	0	0	0	0	0	0	0
1	1	2009	1	0	0	0	0	0	0	0	0	0	0	0	0	1	1		0	0	0	0	0	0	0	0	0	0	0
1	1	2009	1	0	0	0	0	0	0	0	0	0	0	0	0	1	1		0	0	0	0	0	0	0	0	0	0	0
1	1	2009	1	0	0	0	0	0	0	0	0	0	0	0	0	1	1		0	0	0	0	0	0	0	0	0	0	0
1	1	2009	1	0	0	0	0	0	0	0	0	0	0	0	0	1	1		0	0	0	0	0	0	0	0	0	0	0
1	1	2009	1	0	0	0	0	0	0	0	0	0	0	0	0	1	1		0	0	0	0	0	0	0	0	0	0	0
1	1	2009	1	0	0	0	0	0	0	0	0	0	0	0	0	1	1		0	0	0	0	0	0	0	0	0	0	0
1	1	2009	1	0	0	0	0	0	0	0	0	0	0	0	0	1	1		0	0	0	0	0	0	0	0	0	0	0
1	1	2009	1	0	0	0	0	0	0	0	0	0	0	0	0	1	1		0	0	0	0	0	0	0	0	0	0	0
1	1	2009	1	0	0	0	0	0	0	0	0	0	0	0	0	1	1		0	0	0	0	0	0	0	0	0	0	0
1	1	2009	1	0	0	0	0	0	0	0	0	0	0	0	0	1	1		0	0	0	0	0	0	0	0	0	0	0
1	1	2009	1	0	0	0	0	0	0	0	0	0	0	0	0	1	1		0	0	0	0	0	0	0	0	0	0	0
1	1	2009	1	0	0	0	0	0	0	0	0	0	0	0	0	1	1		0	0	0	0	0	0	0	0	0	0	0
1	1	2009	1	0	0	0	0	0	0	0	0	0	0	0	0	1	1		0	0	0	0	0	0	0	0	0	0	0
1	1	2009	1	0	0	0	0	0	0	0	0	0	0	0	0	1	1		0	0	0	0	0	0	0	0	0	0	0
1	1	2009	1	0	0	0	0	0	0	0	0	0	0	0	0	1	1		0	0	0	0	0	0	0	0	0	0	0
1	1	2009	1	0	0	0	0	0	0	0	0	0	0	0	0	1	1		0	0	0	0	0	0	0	0	0	0	0
1	1	2009	1	0	0	0	0	0	0	0	0	0	0	0	0	1	1		0	0	0	0	0	0	0	0	0	0	0
1	1	2009	1	0	0	0	0	0	0	0	0	0	0	0	0	1	1		0	0	0	0	0	0	0	0	0	0	0
1	1	2009	1	0	0	0	0	0	0	0	0	0	0	0	0	1	1		0	0	0	0	0	0	0	0	0	0	0
1	1	2009	1	0	0	0	0	0	0	0	0	0	0	0	0	1	1		0	0	0	0	0	0	0	0	0	0	0
1	1	2009	1	0	0	0	0	0	0	0	0	0	0	0	0	1	1		0	0	0	0	0	0	0	0	0	0	0
1	1	2009	1	0	0	0	0	0	0	0	0	0	0	0	0	1	1		0	0	0	0	0	0	0	0	0	0	0
1	1	2009	1	0	0	0	0	0	0	0	0	0	0	0	0	1	1		0	0	0	0	0	0	0	0	0	0	0
1	1	2009	1	0	0	0	0	0	0	0	0	0	0	0	0	1	1		0	0	0	0	0	0	0	0	0	0	0
1	1	2009	1	0	0	0	0	0	0	0	0	0	0	0	0	1	1		0	0	0	0	0	0	0	0	0	0	0
1	1	2009	1	0	0	0	0	0	0	0	0	0	0	0	0	1	1		0	0	0	0	0	0	0	0	0	0	0
1	1	2009	1	0	0	0	0	0	0	0	0	0	0	0	0	1	1		0	0	0	0	0	0	0	0	0	0	0
1	1	2009	1	0	0	0	0	0	0	0	0	0	0	0	0	1	1		0	0	0	0	0	0	0	0	0	0	0
1	1	2009	1	0	0	0	0	0	0	0	0	0	0	0	0	1	1		0	0	0	0	0	0	0	0	0	0	0
1	1	2009	1	0	0	0	0	0	0	0	0	0	0	0	0	1	1		0	0	0	0	0	0	0	0	0	0	0
1	1	2009	1	0	0	0	0	0	0	0	0	0	0	0	0	1	1		0	0	0	0	0	0	0	0	0	0	0
1	1	2009	1	0	0	0	0	0	0	0	0	0	0	0	0	1	1		0	0	0	0	0	0	0	0	0	0	0
1	1	2009	1	0	0	0	0	0	0	0	0	0	0	0	0	1	1		0	0	0	0	0	0	0	0	0	0	0
1	1	2009	1	0	0	0	0	0	0	0	0	0	0	0	0	1	1		0	0	0	0	0	0	0	0	0	0	0
1	1	2009	1	0	0	0	0	0	0	0	0	0	0	0	0	1	1		0	0	0	0	0	0	0	0	0	0	0
1	1	2009	1	0	0	0	0	0	0	0	0	0	0	0	0	1	1		0	0	0	0	0	0	0	0	0	0	0
1	1	2009	1	0	0	0	0	0	0	0	0	0	0	0	0	1	1		0	0	0	0	0	0	0	0	0	0	0
1	1	2009	1	0	0	0	0	0	0	0	0	0	0	0	0	1	1		0	0	0	0	0	0	0	0	0	0	0
1	1	2009	1	0	0	0	0	0	0	0	0	0	0	0	0	1	1		0	0	0	0	0	0	0	0	0	0	0
1	1	2009	1	0	0	0	0	0	0	0	0	0	0	0	0	1	1		0	0	0	0	0	0	0	0	0	0	0
1	1	2009	1	0	0	0	0	0	0	0	0	0	0	0	0	1	1		0	0	0	0	0	0	0	0	0	0	0
1	1	2009	1	0	0	0	0	0	0	0	0	0	0	0	0	1	1		0	0	0	0	0	0	0	0	0	0	0
1	1	2009	1	0	0	0	0	0	0	0	0	0	0	0	0	1	1		0	0	0	0	0	0	0	0	0	0	0
1	1	2009	1	0	0	0	0	0	0	0	0	0	0	0	0	1	1		0	0	0	0	0	0	0	0	0	0	0
1	1	2009	1	0	0	0	0	0	0	0	0	0	0	0	0	1	1		0	0	0	0	0	0	0	0	0	0	0
1	1	2009	1	0	0	0	0	0	0	0	0	0	0	0	0	1	1		0	0	0	0	0	0	0	0	0	0	0
1	1	2009	1	0	0	0	0	0	0	0	0	0	0	0	0	1	1		0	0	0	0	0	0	0	0	0	0	0
1	1	2009	1	0	0	0	0	0	0	0	0	0	0	0	0	1	1		0	0	0	0	0	0	0	0	0	0	0
1	1	2009	1	0	0	0	0	0	0	0	0	0	0	0	0	1	1		0	0	0	0	0	0	0	0	0	0	0
1	1	2009	1	0	0	0	0	0	0	0	0	0	0	0	0	1	1		0	0	0	0	0	0	0	0	0	0	0
1	1	2009	1	0	0	0	0	0	0	0	0	0	0	0	0	1	1		0	0	0	0	0	0	0	0	0	0	0
1	1	2009	1	0	0	0	0	0	0	0	0	0	0	0	0	1	1		0	0	0	0	0	0	0	0	0	0	0
1	1	2009	1	0	0	0	0	0	0	0	0	0	0	0	0	1	1		0	0	0	0	0	0	0	0	0	0	0
1	1	2009	1	0	0	0	0	0	0	0	0	0	0	0	0	1	1		0	0	0	0	0	0	0	0	0	0	0
1	1	2009	1	0	0	0	0	0	0	0	0	0	0	0	0	1	1		0	0	0	0	0	0	0	0	0	0	0
1	1	2009	1	0	0	0	0	0	0	0	0	0	0	0	0	1	1		0	0	0	0	0	0	0	0	0	0	0
1	1	2009	1	0	0	0	0	0	0	0	0	0	0	0	0	1	1		0	0	0	0	0	0	0	0	0	0	0
1	1	2009	1	0	0	0	0	0	0	0	0	0	0	0	0	1	1		0	0	0	0	0	0	0	0	0	0	0
1	1	2009	1	0	0	0	0	0	0	0	0	0	0	0	0	1	1		0	0	0	0	0	0	0	0	0	0	0
1	1	2009	1	0	0	0	0	0	0	0	0	0	0	0	0	1	1		0	0	0	0	0	0	0	0	0	0	0
1	1	2009	1	0	0	0	0	0	0	0	0	0	0	0	0	1	1		0	0	0	0	0	0	0	0	0	0	0
1	1	2009	1	0	0	0	0	0	0	0	0	0	0	0	0	1	1		0	0	0	0	0	0	0	0	0	0	0
1	1	2009	1	0	0	0	0	0	0	0	0	0	0	0	0	1	1		0	0	0	0	0	0	0	0	0	0	0
1	1	2009	1	0	0	0	0	0	0	0	0	0	0	0	0	1	1		0	0	0	0	0	0	0	0	0	0	0
1	1	2009	1	0	0	0	0	0	0	0	0	0	0	0	0	1	1		0	0	0	0	0	0	0	0	0	0	0
1	1	2009	1	0	0	0	0	0	0	0	0	0	0	0	0	1	1		0	0	0	0	0	0	0	0	0	0	0
1	1	2009	1	0	0	0	0	0	0	0	0	0	0	0	0	1	1		0	0	0	0	0	0	0	0	0	0	0
1	1	2009	1	0	0	0	0	0	0	0	0	0	0	0	0	1	1		0	0	0	0	0	0	0	0	0	0	0
1	1	2009	1	0	0	0	0	0	0	0	0	0	0	0	0	1	1		0	0	0	0	0	0	0	0	0	0	0
1	1	2009	1	0	0	0	0	0	0	0	0	0	0	0	0	1	1		0	0	0	0	0	0	0	0	0	0	0
1	1	2009	1	0	0	0	0	0	0	0	0	0	0	0	0	1	1		0	0	0	0	0	0	0	0	0	0	0
1	1	2009	1	0	0	0	0	0	0	0	0	0	0	0	0	1	1		0	0	0	0	0	0	0	0	0	0	0
1	1	2009	1	0	0	0	0	0	0	0	0	0	0	0	0	1	1		0	0	0	0	0	0	0	0	0	0	0
1	1	2009	1	0	0	0	0	0	0	0	0	0	0	0	0	1	1		0	0	0	0	0	0	0	0	0	0	0
1	1	2009	1	0	0	0	0	0	0	0	0	0	0	0	0	1	1		0	0	0	0	0	0	0	0	0	0	0
1	1	2009	1	0	0	0	0	0	0	0	0	0	0	0	0	1	1		0	0	0	0	0	0	0	0	0	0	0
1	1	2009	1	0	0	0	0	0	0	0	0	0	0	0	0	1	1		0	0	0	0	0	0	0	0	0	0	0
1	1	2009	1	0	0	0	0	0	0	0	0	0	0	0	0	1	1		0	0	0	0	0	0	0	0	0	0	0
1	1	2009	1	0	0	0	0	0	0	0	0	0	0	0	0	1	1		0	0	0	0	0	0	0	0	0	0	0
1	1	2009	1	0	0	0	0	0	0	0	0	0	0	0	0	1	1		0	0	0	0	0	0	0	0	0	0	0
1	1	2009	1	0	0	0	0	0	0	0	0	0	0	0	0	1	1		0	0	0	0	0	0	0	0	0	0	0
1	1	2009	1	0	0	0	0	0	0	0	0	0	0	0	0	1	1		0	0	0	0	0	0	0	0	0	0	0
1	1	2009	1	0	0	0	0	0	0	0	0	0	0	0	0	1	1		0	0	0	0	0	0	0	0	0	0	0
1	1	2009	1	0	0	0	0	0	0	0	0	0	0	0	0	1	1		0	0	0	0	0	0	0	0	0	0	0
1	1	2009	1	0	0	0	0	0	0	0	0	0	0	0	0	1	1		0	0	0	0	0	0	0	0	0	0	0
1	1	2009	1	0	0	0	0	0	0	0	0	0	0	0	0	1	1		0	0	0	0	0	0	0	0	0	0	0
1	1	2009	1	0	0	0	0	0	0	0	0	0	0	0	0	1	1		0	0	0	0	0	0	0	0	0	0	0
1	1	2009	1	0	0	0	0	0	0	0	0	0	0	0	0	1	1		0	0	0	0	0	0	0	0	0	0	0
1	1	2009	1	0	0	0	0	0	0	0	0	0	0	0	0	1	1		0	0	0	0	0	0	0	0	0	0	0
1	1	2009	1	0	0	0	0	0	0	0	0	0	0	0	0	1	1		0	0	0	0	0	0	0	0	0	0	0
1	1	2009	1	0	0	0	0	0	0	0	0	0	0	0	0	1	1		0	0	0	0	0	0	0	0	0	0	0
1	1	2009	1	0	0	0	0	0	0	0	0	0	0	0	0	1	1		0	0	0	0	0	0	0	0	0	0	0
1	1	2009	1	0	0	0	0	0	0	0	0	0	0	0	0	1	1		0	0	0	0	0	0	0	0	0	0	0
1	1	2009	1	0	0	0	0	0	0	0	0	0	0	0	0	1	1		0	0	0	0	0	0	0	0	0	0	0
1	1	2009	1	0	0	0	0	0	0	0	0	0	0	0	0	1	1		0	0	0	0	0	0	0	0	0	0	0
1	1	2009	1	0	0	0	0	0	0	0	0	0	0	0	0	1	1		0	0	0	0	0	0	0	0	0	0	0
1	1	2009	1	0	0	0	0	0	0	0	0	0	0	0	0	1	1		0	0	0	0	0	0	0	0	0	0	0
1	1	2009	1	0	0	0	0	0	0	0	0	0	0	0	0	1	1		0	0	0	0	0	0	0	0	0	0	0
1	1	2009	1	0	0	0	0	0	0	0	0	0	0	0	0	1	1		0	0	0	0	0	0	0	0	0	0	0
1	1	2009	1	0	0	0	0	0	0	0	0	0	0	0	0	1	1		0	0	0	0	0	0	0	0	0	0	0
1	1	2009	1	0	0	0	0	0	0	0	0	0	0	0	0	1	1		0	0	0	0	0	0	0	0	0	0	0
1	1	2009	1	0	0	0	0	0	0	0	0	0	0	0	0	1	1		0	0	0	0	0	0	0	0	0	0	0
1	1	2009	1	0	0	0	0	0	0	0	0	0	0	0	0	1	1		0	0	0	0	0	0	0	0	0	0	0
1	1	2009	1	0	0	0	0	0	0	0	0	0	0	0	0	1	1		0	0	0	0	0	0	0	0	0	0	0
1	1	2009	1	0	0	0	0	0	0	0	0	0	0	0	0	1	1		0	0	0	0	0	0	0	0	0	0	0
1	1	2009	1	0	0	0	0	0	0	0	0	0	0	0	0	1	1		0	0	0	0	0	0	0	0	0	0	0
1	1	2009	1	0	0	0	0	0	0	0	0	0	0	0	0	1	1		0	0	0	0	0	0	0	0	0	0	0
1	1	2009	1	0	0	0	0	0	0	0	0	0	0	0	0	1	1		0	0	0	0	0	0	0	0	0	0	0
1	1	2009	1	0	0	0	0	0	0	0	0	0	0	0	0	1	1		0	0	0	0	0	0	0	0	0	0	0
1	1	2009	1	0	0	0	0	0	0	0	0	0	0	0	0	1	1		0	0	0	0	0	0	0	0	0	0	0
1	1	2009	1	0	0	0	0	0	0	0	0	0	0	0	0	1	1		0	0	0	0	0	0	0	0	0	0	0
1	1	2009	1	0	0	0	0	0	0	0	0	0	0	0	0	1	1		0	0	0	0	0	0	0	0	0	0	0
1	1	2009	1	0	0	0	0	0	0	0	0	0	0	0	0	1	1		0	0	0	0	0	0	0	0	0	0	0
1	1	2009	1	0	0	0	0	0	0	0	0	0	0	0	0	1	1		0	0	0	0	0	0	0	0	0	0	0
1	1	2009	1	0	0	0	0	0	0	0	0	0	0	0	0	1	1		0	0	0	0	0	0	0	0	0	0	0
1	1	2009	1	0	0	0	0	0	0	0	0	0	0	0	0	1	1		0	0	0	0	0	0	0	0	0	0	0
1	1	2009	1	0	0	0	0	0	0	0	0	0	0	0	0	1	1		0	0	0	0	0	0	0	0	0	0	0
1	1	2009	1	0	0	0	0	0	0	0	0	0	0	0	0	1	1		0	0	0	0	0	0	0	0	0	0	0
1	1	2009	1	0	0	0	0	0	0	0	0	0	0	0	0	1	1		0	0	0	0	0	0	0	0	0	0	0
1	1	2009	1	0	0	0	0	0	0	0	0	0	0	0	0	1	1		0	0	0	0	0	0	0	0	0	0	0
1	1	2009	1	0	0	0	0	0	0	0	0	0	0	0	0	1	1		0	0	0	0	0	0	0	0	0	0	0
1	1	2009	1	0	0	0	0	0	0	0	0	0	0	0	0	1	1		0	0	0	0	0	0	0	0	0	0	0
1	1	2009	1	0	0	0	0	0	0	0	0	0	0	0	0	1	1		0	0	0	0	0	0	0	0	0	0	0
1	1	2009	1	0	0	0	0	0	0	0	0	0	0	0	0	1	1		0	0	0	0	0	0	0	0	0	0	0
1	1	2009	1	0	0	0	0	0	0	0	0	0	0	0	0	1	1		0	0	0	0	0	0	0	0	0	0	0
1	1	2009	1	0	0	0	0	0	0	0	0	0	0	0	0	1	1		0	0	0	0	0	0	0	0	0	0	0
1	1	2009	1	0	0	0	0	0	0	0	0	0	0	0	0	1	1		0	0	0	0	0	0	0	0	0	0	0
1	1	2009	1	0	0	0	0	0	0	0	0	0	0	0	0	1	1		0	0	0	0	0	0	0	0	0	0	0
1	1	2009	1	0	0	0	0	0	0	0	0	0	0	0	0	1	1		0	0	0	0	0	0	0	0	0	0	0
1	1	2009	1	0	0	0	0	0	0	0	0	0	0	0	0	1	1		0	0	0	0	0	0	0	0	0	0	0
1	1	2009	1	0	0	0	0	0	0	0	0	0	0	0	0	1	1		0	0	0	0	0	0	0	0	0	0	0
1	1	2009	1	0	0	0	0	0	0	0	0	0	0	0	0	1	1		0	0	0	0	0	0	0	0	0	0	0
1	1	2009	1	0	0	0	0	0	0	0	0	0	0	0	0	1	1		0	0	0	0	0	0	0	0	0	0	0
1	1	2009	1	0	0	0	0	0	0	0	0	0	0	0	0	1	1		0	0	0	0	0	0	0	0	0	0	0
1	1	2009	1	0	0	0	0	0	0	0	0	0	0	0	0	1	1		0	0	0	0	0	0	0	0	0	0	0
1	1	2009	1	0	0	0	0	0	0	0	0	0	0	0	0	1	1		0	0	0	0	0	0	0	0	0	0	0
1	1	2009	1	0	0	0	0	0	0	0	0	0	0	0	0	1	1		0	0	0	0	0	0	0	0	0	0	0
1	1	2009	1	0	0	0	0	0	0	0	0	0	0	0	0	1	1		0	0	0	0	0	0	0	0	0	0	0
1	1	2009	1	0	0	0	0	0	0	0	0	0	0	0	0	1	1		0	0	0	0	0	0	0	0	0	0	0
1	1	2009	1	0	0	0	0	0	0	0	0	0	0	0	0	1	1		0	0	0	0	0	0	0	0	0	0	0
1	1	2009	1	0	0	0	0	0	0	0	0	0	0	0	0	1	1		0	0	0	0	0	0	0	0	0	0	0
1	1	2009	1	0	0	0	0	0	0	0	0	0	0	0	0	1	1		0	0	0	0	0	0	0	0	0	0	0
1	1	2009	1	0	0	0	0	0	0	0	0	0	0	0	0	1	1		0	0	0	0	0	0	0	0	0	0	0
1	1	2009	1	0	0	0	0	0	0	0	0	0	0	0	0	1	1		0	0	0	0	0	0	0	0	0	0	0
1	1	2009	1	0	0	0	0	0	0	0	0	0	0	0	0	1	1		0	0	0	0	0	0	0	0	0	0	0
1	1	2009	1	0	0	0	0	0	0	0	0	0	0	0	0	1	1		0	0	0	0	0	0	0	0	0	0	0
1	1	2009	1	0	0	0	0	0	0	0	0	0	0	0	0	1	1		0	0	0	0	0	0	0	0	0	0	0
1	1	2009	1	0	0	0	0	0	0	0	0	0	0	0	0	1	1		0	0	0	0	0	0	0	0	0	0	0
1	1	2009	1	0	0	0	0	0	0	0	0	0	0	0	0	1	1		0	0	0	0	0	0	0	0	0	0	0
1	1	2009	1	0	0	0	0	0	0	0	0	0	0	0	0	1	1		0	0	0	0	0	0	0	0	0	0	0
1	1	2009	1	0	0	0	0	0	0	0	0	0	0	0	0	1	1		0	0	0	0	0	0	0	0	0	0	0
1	1	2009	1	0	0	0	0	0	0	0	0	0	0	0	0	1	1		0	0	0	0	0	0	0	0	0	0	0
1	1	2009	1	0	0	0	0	0	0	0	0	0	0	0	0	1	1		0	0	0	0	0	0	0	0	0	0	0
1	1	2009	1	0	0	0	0	0	0	0	0	0	0	0	0	1	1		0	0	0	0	0	0	0	0	0	0	0
1	1	2009	1	0	0	0	0	0	0	0	0	0	0	0	0	1	1		0	0	0	0	0	0	0	0	0	0	0
1	1	2009	1	0	0	0	0	0	0	0	0	0	0	0	0	1	1		0	0	0	0	0	0	0	0	0	0	0
1	1	2009	1	0	0	0	0	0	0	0	0	0	0	0	0	1	1		0	0	0	0	0	0	0	0	0	0	0
1	1	2009	1	0	0	0	0	0	0	0	0	0	0	0	0	1	1		0	0	0	0	0	0	0	0	0	0	0
1	1	2009	1	0	0	0	0	0	0	0	0	0	0	0	0	1	1		0	0	0	0	0	0	0	0	0	0	0
1	1	2009	1	0	0	0	0	0	0	0	0	0	0	0	0	1	1		0	0	0	0	0	0	0	0	0	0	0
1	1	2009	1	0	0	0	0	0	0	0	0	0	0	0	0	1	1		0	0	0	0	0	0	0	0	0	0	0
1	1	2009	1	0	0	0	0	0	0	0	0	0	0	0	0	1	1		0	0	0	0	0	0	0	0	0	0	0
1	1	2009	1	0	0	0	0	0	0	0	0	0	0	0	0	1	1		0	0	0	0	0	0	0	0	0	0	0
1	1	2009	1	0	0	0	0	0	0	0	0	0	0	0	0	1	1		0	0	0	0	0	0	0	0	0	0	0
1	1	2009	1	0	0	0	0	0	0	0	0	0	0	0	0	1	1		0	0	0	0	0	0	0	0	0	0	0
1	1	2009	1	0	0	0	0	0	0	0	0	0	0	0	0	1	1		0	0	0	0	0	0	0	0	0	0	0
1	1	2009	1	0	0	0	0	0	0	0	0	0	0	0	0	1	1		0	0	0	0	0	0	0	0	0	0	0
1	1	2009	1	0	0	0	0	0	0	0	0	0	0	0	0	1	1		0	0	0	0	0	0	0	0	0	0	0
1	1	2009	1	0	0	0	0	0	0	0	0	0	0	0	0	1	1		0	0	0	0	0	0	0	0	0	0	0
1	1	2009	1	0	0	0	0	0	0	0	0	0	0	0	0	1	1		0	0	0	0	0	0	0	0	0	0	0
1	1	2009	1	0	0	0	0	0	0	0	0	0	0	0	0	1	1		0	0	0	0	0	0	0	0	0	0	0
1	1	2009	1	0	0	0	0	0	0	0	0	0	0	0	0	1	1		0	0	0	0	0	0	0	0	0	0	0
1	1	2009	1	0	0	0	0	0	0	0	0	0	0	0	0	1	1		0	0	0	0	0	0	0	0	0	0	0
1	1	2009	1	0	0	0	0	0	0	0	0	0	0	0	0	1	1		0	0	0	0	0	0	0	0	0	0	0
1	1	2009	1	0	0	0	0	0	0	0	0	0	0	0	0	1	1		0	0	0	0	0	0	0	0	0	0	0
1	1	2009	1	0	0	0	0	0	0	0	0	0	0	0	0	1	1		0	0	0	0	0	0	0	0	0	0	0
1	1	2009	1	0	0	0	0	0	0	0	0	0	0	0	0	1	1		0	0	0	0	0	0	0	0	0	0	0
1	1	2009	1	0	0	0	0	0	0	0	0	0	0	0	0	1	1		0	0	0	0	0	0	0	0	0	0	0
1	1	2009	1	0	0	0	0	0	0	0	0	0	0	0	0	1	1		0	0	0	0	0	0	0	0	0	0	0
1	1	2009	1	0	0	0	0	0	0	0	0	0	0	0	0	1	1		0	0	0	0	0	0	0	0	0	0	0
1	1	2009	1	0	0	0	0	0	0	0	0	0	0	0	0	1	1		0	0	0	0	0	0	0	0	0	0	0
1	1	2009	1	0	0	0	0	0	0	0	0	0	0	0	0	1	1		0	0	0	0	0	0	0	0	0	0	0
1	1	2009	1	0	0	0	0	0	0	0	0	0	0	0	0	1	1		0	0	0	0	0	0	0	0	0	0	0
1	1	2009	1	0	0	0	0	0	0	0	0	0	0	0	0	1	1		0	0	0	0	0	0	0	0	0	0	0
1	1	2009	1	0	0	0	0	0	0	0	0	0	0	0	0	1	1		0	0	0	0	0	0	0	0	0	0	0
1	1	2009	1	0	0	0	0	0	0	0	0	0	0	0	0	1	1		0	0	0	0	0	0	0	0	0	0	0
1	1	2009	1	0	0	0	0	0	0	0	0	0	0	0	0	1	1		0	0	0	0	0	0	0	0	0	0	0
1	1	2009	1	0	0	0	0	0	0	0	0	0	0	0	0	1	1		0	0	0	0	0	0	0	0	0	0	0
1	1	2009	1	0	0	0	0	0	0	0	0	0	0	0	0	1	1		0	0	0	0	0	0	0	0	0	0	0
1	1	2009	1	0	0	0	0	0	0	0	0	0	0	0	0	1	1		0	0	0	0	0	0	0	0	0	0	0
1	1	2009	1	0	0	0	0	0	0	0	0	0	0	0	0	1	1		0	0	0	0	0	0	0	0	0	0	0
1	1	2009	1	0	0	0	0	0	0	0	0	0	0	0	0	1	1		0	0	0	0	0	0	0	0	0	0	0
1	1	2009	1	0	0	0	0	0	0	0	0	0	0	0	0	1	1		0	0	0	0	0	0	0	0	0	0	0
1	1	2009	1	0	0	0	0	0	0	0	0	0	0	0	0	1	1		0	0	0	0	0	0	0	0	0	0	0
1	1	2009	1	0	0	0	0	0	0	0	0	0	0	0	0	1	1		0	0	0	0	0	0	0	0	0	0	0
1	1	2009	1	0	0	0	0	0	0	0	0	0	0	0	0	1	1		0	0	0	0	0	0	0	0	0	0	0
1	1	2009	1	0	0	0	0	0	0	0	0	0	0	0	0	1	1		0	0	0	0	0	0	0	0	0	0	0
1	1	2009	1	0	0	0	0	0	0	0	0	0	0	0	0	1	1		0	0	0	0	0	0	0	0	0	0	0
1	1	2009	1	0	0	0	0	0	0	0	0	0	0	0	0	1	1		0	0	0	0	0	0	0	0	0	0	0
1	1	2009	1	0	0	0	0	0	0	0	0	0	0	0	0	1	1		0	0	0	0	0	0	0	0	0	0	0
1	1	2009	1	0	0	0	0	0	0	0	0	0	0	0	0	1	1		0	0	0	0	0	0	0	0	0	0	0
1	1	2009	1	0	0	0	0	0	0	0	0	0	0	0	0	1	1		0	0	0	0	0	0	0	0	0	0	0
1	1	2009	1	0	0	0	0	0	0	0	0	0	0	0	0	1	1		0	0	0	0	0	0	0	0	0	0	0
1	1	2009	1	0	0	0	0	0	0	0	0	0	0	0	0	1	1		0	0	0	0	0	0	0	0	0	0	0
1	1	2009	1	0	0	0	0	0	0	0	0	0	0	0	0	1	1		0	0	0	0	0	0	0	0	0	0	0
1	1	2009	1	0	0	0	0	0	0	0	0	0	0	0	0	1	1		0	0	0	0	0	0	0	0	0	0	0
1	1	2009	1	0	0	0	0	0	0	0	0	0	0	0	0	1	1		0	0	0	0	0	0	0	0	0	0	0
1	1	2009	1	0	0	0	0	0	0	0	0	0	0	0	0	1	1		0	0	0	0	0	0	0	0	0	0	0
1	1	2009	1	0	0	0	0	0	0	0	0	0	0	0	0	1	1		0	0	0	0	0	0	0	0	0	0	0
1	1	2009	1	0	0	0	0	0	0	0	0	0	0	0	0	1	1		0	0	0	0	0	0	0	0	0	0	0
1	1	2009	1	0	0	0	0	0	0	0	0	0	0	0	0	1	1		0	0	0	0	0	0	0	0	0	0	0
1	1	2009	1	0	0	0	0	0	0	0	0	0	0	0	0	1	1		0	0	0	0	0	0	0	0	0	0	0
1	1	2009	1	0	0	0	0	0	0	0	0	0	0	0	0	1	1		0	0	0	0	0	0	0	0	0	0	0
1	1	2009	1	0	0	0	0	0	0	0	0	0	0	0	0	1	1		0	0	0	0	0	0	0	0	0	0	0
1	1	2009	1	0	0	0	0	0	0	0	0	0	0	0	0	1	1		0	0	0	0	0	0	0	0	0	0	0
1	1	2009	1	0	0	0	0	0	0	0	0	0	0	0	0	1	1		0	0	0	0	0	0	0	0	0	0	0
1	1	2009	1	0	0	0	0	0	0	0	0	0	0	0	0	1	1		0	0	0	0	0	0	0	0	0	0	0
1	1	2009	1	0	0	0	0	0	0	0	0	0	0	0	0	1	1		0	0	0	0	0	0	0	0	0	0	0
1	1	2009	1	0	0	0	0	0	0	0	0	0	0	0	0	1	1		0	0	0	0	0	0	0	0	0	0	0
1	1	2009	1	0	0	0	0	0	0	0	0	0	0	0	0	1	1		0	0	0	0	0	0	0	0	0	0	0
1	1	2009	1	0	0	0	0	0	0	0	0	0	0	0	0	1	1		0	0	0	0	0	0	0	0	0	0	0
1	1	2009	1	0	0	0	0	0	0	0	0	0	0	0	0	1	1		0	0	0	0	0	0	0	0	0	0	0
1	1	2009	1	0	0	0	0	0	0	0	0	0	0	0	0	1	1		0	0	0	0	0	0	0	0	0	0	0
1	1	2009	1	0	0	0	0	0	0	0	0	0	0	0	0	1	1		0	0	0	0	0	0	0	0	0	0	0
1	1	2009	1	0	0	0	0	0	0	0	0	0	0	0	0	1	1		0	0	0	0	0	0	0	0	0	0	0
1	1	2009	1	0	0	0	0	0	0	0	0	0	0	0	0	1	1		0	0	0	0	0	0	0	0	0	0	0
1	1	2009	1	0	0	0	0	0	0	0	0	0	0	0	0	1	1		0	0	0	0	0	0	0	0	0	0	0
1	1	2009	1	0	0	0	0	0	0	0	0	0	0	0	0	1	1		0	0	0	0	0	0	0	0	0	0	0
1	1	2009	1	0	0	0	0	0	0	0	0	0	0	0	0	1	1		0	0	0	0	0	0	0	0	0	0	0
1	1	2009	1	0	0	0	0	0	0	0	0	0	0	0	0	1	1		0	0	0	0	0	0	0	0	0	0	0
1	1	2009	1	0	0	0	0	0	0	0	0	0	0	0	0	1	1		0	0	0	0	0	0	0	0	0	0	0
1	1	2009	1	0	0	0	0	0	0	0	0	0	0	0	0	1	1		0	0	0	0	0	0	0	0	0	0	0
1	1	2009	1	0	0	0	0	0	0	0	0	0	0	0	0	1	1		0	0	0	0	0	0	0	0	0	0	0
1	1	2009	1	0	0	0	0	0	0	0	0	0	0	0	0	1	1		0	0	0	0	0	0	0	0	0	0	0
1	1	2009	1	0	0	0	0	0	0	0	0	0	0	0	0	1	1		0	0	0	0	0	0	0	0	0	0	0
1	1	2009	1	0	0	0	0	0	0	0	0	0	0	0	0	1	1		0	0	0	0	0	0	0	0	0	0	0
1	1	2009	1	0	0	0	0	0	0	0	0	0	0	0	0	1	1		0	0	0	0	0	0	0	0	0	0	0
1	1	2009	1	0	0	0	0	0	0	0	0	0	0	0	0	1	1		0	0	0	0	0	0	0	0	0	0	0
1	1	2009	1	0	0	0	0	0	0	0	0	0	0	0	0	1	1		0	0	0	0	0	0	0	0	0	0	0
1	1	2009	1	0	0	0	0	0	0	0	0	0	0	0	0	1	1		0	0	0	0	0	0	0	0	0	0	0
1	1	2009	1	0	0	0	0	0	0	0	0	0	0	0	0	1	1		0	0	0	0	0	0	0	0	0	0	0
1	1	2009	1	0	0	0	0	0	0	0	0	0	0	0	0	1	1		0	0	0	0	0	0	0	0	0	0	0
1	1	2009	1	0	0	0	0	0	0	0	0	0	0	0	0	1	1		0	0	0	0	0	0	0	0	0	0	0
1	1	2009	1	0	0	0	0	0	0	0	0	0	0	0	0	1	1		0	0	0	0	0	0	0	0	0	0	0
1	1	2009	1	0	0	0	0	0	0	0	0	0	0	0	0	1	1		0	0	0	0	0	0	0	0	0	0	0
1	1	2009	1	0	0	0	0	0	0	0	0	0	0	0	0	1	1		0	0	0	0	0	0	0	0	0	0	0
1	1	2009	1	0	0	0	0	0	0	0	0	0	0	0	0	1	1		0	0	0	0	0	0	0	0	0	0	0
1	1	2009	1	0	0	0	0	0	0	0	0	0	0	0	0	1	1		0	0	0	0	0	0	0	0	0	0	0
1	1	2009	1	0	0	0	0	0	0	0	0	0	0	0	0	1	1		0	0	0	0	0	0	0	0	0	0	0
1	1	2009	1	0	0	0	0	0	0	0	0	0	0	0	0	1	1		0	0	0	0	0	0	0	0	0	0	0
1	1	2009	1	0	0	0	0	0	0	0	0	0	0	0	0	1	1		0	0	0	0	0	0	0	0	0	0	0
1	1	2009	1	0	0	0	0	0	0	0	0	0	0	0	0	1	1		0	0	0	0	0	0	0	0	0	0	0
1	1	2009	1	0	0	0	0	0	0	0	0	0	0	0	0	1	1		0	0	0	0	0	0	0	0	0	0	0
1	1	2009	1	0	0	0	0	0	0	0	0	0	0	0	0	1	1		0	0	0	0	0	0	0	0	0	0	0
1	1	2009	1	0	0	0	0	0	0	0	0	0	0	0	0	1	1		0	0	0	0	0	0	0	0	0	0	0
1	1	2009	1	0	0	0	0	0	0	0	0	0	0	0	0	1	1		0	0	0	0	0	0	0	0	0	0	0
1	1	2009	1	0	0	0	0	0	0	0	0	0	0	0	0	1	1		0	0	0	0	0	0	0	0	0	0	0
1	1	2009	1	0	0	0	0	0	0	0	0	0	0	0	0	1	1		0	0	0	0	0	0	0	0	0	0	0
1	1	2009	1	0	0	0	0	0	0	0	0	0	0	0	0	1	1		0	0	0	0	0	0	0	0	0	0	0
1	1	2009	1	0	0	0	0	0	0	0	0	0	0	0	0	1	1		0	0	0	0	0	0	0	0	0	0	0
1	1	2009	1	0	0	0	0	0	0	0	0	0	0	0	0	1	1		0	0	0	0	0	0	0	0	0	0	0
1	1	2009	1	0	0	0	0	0	0	0	0	0	0	0	0	1	1		0	0	0	0	0	0	0	0	0	0	0
1	1	2009	1	0	0	0	0	0	0	0	0	0	0	0	0	1	1		0	0	0	0	0	0	0	0	0	0	0
1	1	2009	1	0	0	0	0	0	0	0	0	0	0	0	0	1	1		0	0	0	0	0	0	0	0	0	0	0
1	1	2009	1	0	0	0	0	0	0	0	0	0	0	0	0	1	1		0	0	0	0	0	0	0	0	0	0	0
1	1	2009	1	0	0	0	0	0	0	0	0	0	0	0	0	1	1		0	0	0	0	0	0	0	0	0	0	0
1	1	2009	1	0	0	0	0	0	0	0	0	0	0	0	0	1	1		0	0	0	0	0	0	0	0	0	0	0
1	1	2009	1	0	0	0	0	0	0	0	0	0	0	0	0	1	1		0	0	0	0	0	0	0	0	0	0	0
1	1	2009	1	0	0	0	0	0	0	0	0	0	0	0	0	1	1		0	0	0	0	0	0	0	0	0	0	0
1	1	2009	1	0	0	0	0	0	0	0	0	0	0	0	0	1	1		0	0	0	0	0	0	0	0	0	0	0
1	1	2009	1	0	0	0	0	0	0	0	0	0	0	0	0	1	1		0	0	0	0	0	0	0	0	0	0	0
1	1	2009	1	0	0	0	0	0	0	0	0	0	0	0	0	1	1		0	0	0	0	0	0	0	0	0	0	0
1	1	2009	1	0	0	0	0	0	0	0	0	0	0	0	0	1	1		0	0	0	0	0	0	0	0	0	0	0
1	1	2009	1	0	0	0	0	0	0	0	0	0	0	0	0	1	1		0	0	0	0	0	0	0	0	0	0	0
1	1	2009	1	0	0	0	0	0	0	0	0	0	0	0	0	1	1		0	0	0	0	0	0	0	0	0	0	0
1	1	2009	1	0	0	0	0	0	0	0	0	0	0	0	0	1	1		0	0	0	0	0	0	0	0	0	0	0
1	1	2009	1	0	0	0	0	0	0	0	0	0	0	0	0	1	1		0	0	0	0	0	0	0	0	0	0	0
1	1	2009	1	0	0	0	0	0	0	0	0	0	0	0	0	1	1		0	0	0	0	0	0	0	0	0	0	0
1	1	2009	1	0	0	0	0	0	0	0	0	0	0	0	0	1	1		0	0	0	0	0	0	0	0	0	0	0
1	1	2009	1	0	0	0	0	0	0	0	0	0	0	0	0	1	1		0	0	0	0	0	0	0	0	0	0	0
1	1	2009	1	0	0	0	0	0	0	0	0	0	0	0	0	1	1		0	0	0	0	0	0	0	0	0	0	0
1	1	2009	1	0	0	0	0	0	0	0	0	0	0	0	0	1	1		0	0	0	0	0	0	0	0	0	0	0
1	1	2009	1	0	0	0	0	0	0	0	0	0	0	0	0	1	1		0	0	0	0	0	0	0	0	0	0	0
1	1	2009	1	0	0	0	0	0	0	0	0	0	0	0	0	1	1		0	0	0	0	0	0	0	0	0	0	0
1	1	2009	1	0	0	0	0	0	0	0	0	0	0	0	0	1	1		0	0	0	0	0	0	0	0	0	0	0
1	1	2009	1	0	0	0	0	0	0	0	0	0	0	0	0	1	1		0	0	0	0	0	0	0	0	0	0	0
1	1	2009	1	0	0	0	0	0	0	0	0	0	0	0	0	1	1		0	0	0	0	0	0	0	0	0	0	0
1	1	2009	1	0	0	0	0	0	0	0	0	0	0	0	0	1	1		0	0	0	0	0	0	0	0	0	0	0
1	1	2009	1	0	0	0	0	0	0	0	0	0	0	0	0	1	1		0	0	0	0	0	0	0	0	0	0	0
1	1	2009	1	0	0	0	0	0	0	0	0	0	0	0	0	1	1		0	0	0	0	0	0	0	0	0	0	0
1	1	2009	1	0	0	0	0	0	0	0	0	0	0	0	0	1	1		0	0	0	0	0	0	0	0	0	0	0
1	1	2009	1	0	0	0	0	0	0	0	0	0	0	0	0	1	1		0	0	0	0	0	0	0	0	0	0	0
1	1	2009	1	0	0	0	0	0	0	0	0	0	0	0	0	1	1		0	0	0	0	0	0	0	0	0	0	0
1	1	2009	1	0	0	0	0	0	0	0	0	0	0	0	0	1	1		0	0	0	0	0	0	0	0	0	0	0
1	1	2009	1	0	0	0	0	0	0	0	0	0	0	0	0	1	1		0	0	0	0	0	0	0	0	0	0	0
1	1	2009	1	0	0	0	0	0	0	0	0	0	0	0	0	1	1		0	0	0	0	0	0	0	0	0	0	0
1	1	2009	1	0	0	0	0	0	0	0	0	0	0	0	0	1	1		0	0	0	0	0	0	0	0	0	0	0
1	1	2009	1	0	0	0	0	0	0	0	0	0	0	0	0	1	1		0	0	0	0	0	0	0	0	0	0	0
1	1	2009	1	0	0	0	0	0	0	0	0	0	0	0	0	1	1		0	0	0	0	0	0	0	0	0	0	0
1	1	2009	1	0	0	0	0	0	0	0	0	0	0	0	0	1	1		0	0	0	0	0	0	0	0	0	0	0
1	1	2009	1	0	0	0	0	0	0	0	0	0	0	0	0	1	1		0	0	0	0	0	0	0	0	0	0	0
1	1	2009	1	0	0	0	0	0	0	0	0	0	0	0	0	1	1		0	0	0	0	0	0	0	0	0	0	0
1	1	2009	1	0	0	0	0	0	0	0	0	0	0	0	0	1	1		0	0	0	0	0	0	0	0	0	0	0
1	1	2009	1	0	0	0	0	0	0	0	0	0	0	0	0	1	1		0	0	0	0	0	0	0	0	0	0	0
1	1	2009	1	0	0	0	0	0	0	0	0	0	0	0	0	1	1		0	0	0	0	0	0	0	0	0	0	0
1	1	2009	1	0	0	0	0	0	0	0	0	0	0	0	0	1	1		0	0	0	0	0	0	0	0	0	0	0
1	1	2009	1	0	0	0	0	0	0	0	0	0	0	0	0	1	1		0	0	0	0	0	0	0	0	0	0	0
1	1	2009	1	0	0	0	0	0	0	0	0	0	0	0	0	1	1		0	0	0	0	0	0	0	0	0	0	0
1	1	2009	1	0	0	0	0	0	0	0	0	0	0	0	0	1	1		0	0	0	0	0	0	0	0	0	0	0
1	1	2009	1	0	0	0	0	0	0	0	0	0	0	0	0	1	1		0	0	0	0	0	0	0	0	0	0	0
1	1	2009	1	0	0	0	0	0	0	0	0	0	0	0	0	1	1		0	0	0	0	0	0	0	0	0	0	0
1	1	2009	1	0	0	0	0	0	0	0	0	0	0	0	0	1	1		0	0	0	0	0	0	0	0	0	0	0
1	1	2009	1	0	0	0	0	0	0	0	0	0	0	0	0	1	1		0	0	0	0	0	0	0	0	0	0	0
1	1	2009	1	0	0	0	0	0	0	0	0	0	0	0	0	1	1		0	0	0	0	0	0	0	0	0	0	0
1	1	2009	1	0	0	0	0	0	0	0	0	0	0	0	0	1	1		0	0	0	0	0	0	0	0	0	0	0
1	1	2009	1	0	0	0	0	0	0	0	0	0	0	0	0	1	1		0	0	0	0	0	0	0	0	0	0	0
1	1	2009	1	0	0	0	0	0	0	0	0	0	0	0	0	1	1		0	0	0	0	0	0	0	0	0	0	0
1	1	2009	1	0	0	0	0	0	0	0	0	0	0	0	0	1	1		0	0	0	0	0	0	0	0	0	0	0
1	1	2009	1	0	0	0	0	0	0	0	0	0	0	0	0	1	1		0	0	0	0	0	0	0	0	0	0	0
1	1	2009	1	0	0	0	0	0	0	0	0	0	0	0	0	1	1		0	0	0	0	0	0	0	0	0	0	0
1	1	2009	1	0	0	0	0	0	0	0	0	0	0	0	0	1	1		0	0	0	0	0	0	0	0	0	0	0
1	1	2009	1	0	0	0	0	0	0	0	0	0	0	0	0	1	1		0	0	0	0	0	0	0	0	0	0	0
1	1	2009	1	0	0	0	0	0	0	0	0	0	0	0	0	1	1		0	0	0	0	0	0	0	0	0	0	0
1	1	2009	1	0	0	0	0	0	0	0	0	0	0	0	0	1	1		0	0	0	0	0	0	0	0	0	0	0
1	1	2009	1	0	0	0	0	0	0	0	0	0	0	0	0	1	1		0	0	0	0	0	0	0	0	0	0	0
1	1	2009	1	0	0	0	0	0	0	0	0	0	0	0	0	1	1		0	0	0	0	0	0	0	0	0	0	0
1	1	2009	1	0	0	0	0	0	0	0	0	0	0	0	0	1	1		0	0	0	0	0	0	0	0	0	0	0
1	1	2009	1	0	0	0	0	0	0	0	0	0	0	0	0	1	1		0	0	0	0	0	0	0	0	0	0	0
1	1	2009	1	0	0	0	0	0	0	0	0	0	0	0	0	1	1		0	0	0	0	0	0	0	0	0	0	0
1	1	2009	1	0	0	0	0	0	0	0	0	0	0	0	0	1	1		0	0	0	0	0	0	0	0	0	0	0
1	1	2009	1	0	0	0	0	0	0	0	0	0	0	0	0	1	1		0	0	0	0	0	0	0	0	0	0	0
1	1	2009	1	0	0	0	0	0	0	0	0	0	0	0	0	1	1		0	0	0	0	0	0	0	0	0	0	0
1	1	2009	1	0	0	0	0	0	0	0	0	0	0	0	0	1	1		0	0	0	0	0	0	0	0	0	0	0
1	1	2009	1	0	0	0	0	0	0	0	0	0	0	0	0	1	1		0	0	0	0	0	0	0	0	0	0	0
1	1	2009	1	0	0	0	0	0	0	0	0	0	0	0	0	1	1		0	0	0	0	0	0	0	0	0	0	0
1	1	2009	1	0	0	0	0	0	0	0	0	0	0	0	0	1	1		0	0	0	0	0	0	0	0	0	0	0
1	1	2009	1	0	0	0	0	0	0	0	0	0	0	0	0	1	1		0	0	0	0	0	0	0	0	0	0	0
1	1	2009	1	0	0	0	0	0	0	0	0	0	0	0	0	1	1		0	0	0	0	0	0	0	0	0	0	0
1	1	2009	1	0	0	0	0	0	0	0	0	0	0	0	0	1	1		0	0	0	0	0	0	0	0	0	0	0
1	1	2009	1	0	0	0	0	0	0	0	0	0	0	0	0	1	1		0	0	0	0	0	0	0	0	0	0	0
1	1	2009	1	0	0	0	0	0	0	0	0	0	0	0	0	1	1		0	0	0	0	0	0	0	0	0	0	0
1	1	2009	1	0	0	0	0	0	0	0	0	0	0	0	0	1	1		0	0	0	0	0	0	0	0	0	0	0
1	1	2009	1	0	0	0	0	0	0	0	0	0	0	0	0	1	1		0	0	0	0	0	0	0	0	0	0	0
1	1	2009	1	0	0	0	0	0	0	0	0	0	0	0	0	1	1		0	0	0	0	0	0	0	0	0	0	0
1	1	2009	1	0	0	0	0	0	0	0	0	0	0	0	0	1	1		0	0	0	0	0	0	0	0	0	0	0
1	1	2009	1	0	0	0	0	0	0	0	0	0	0	0	0	1	1		0	0	0	0	0	0	0	0	0	0	0
1	1	2009	1	0	0	0	0	0	0	0	0	0	0	0	0	1	1		0	0	0	0	0	0	0	0	0	0	0
1	1	2009	1	0	0	0	0	0	0	0	0	0	0	0	0	1	1		0	0	0	0	0	0	0	0	0	0	0
1	1	2009	1	0	0	0	0	0	0	0	0	0	0	0	0	1	1		0	0	0	0	0	0	0	0	0	0	0
1	1	2009	1	0	0	0	0	0	0	0	0	0	0	0	0	1	1		0	0	0	0	0	0	0	0	0	0	0
1	1	2009	1	0	0	0	0	0	0	0	0	0	0	0	0	1	1		0	0	0	0	0	0	0	0	0	0	0
1	1	2009	1	0	0	0	0	0	0	0	0	0	0	0	0	1	1		0	0	0	0	0	0	0	0	0	0	0
1	1	2009	1	0	0	0	0	0	0	0	0	0	0	0	0	1	1		0	0	0	0	0	0	0	0	0	0	0
1	1	2009	1	0	0	0	0	0	0	0	0	0	0	0	0	1	1		0	0	0	0	0	0	0	0	0	0	0
1	1	2009	1	0	0	0	0	0	0	0	0	0	0	0	0	1	1		0	0	0	0	0	0	0	0	0	0	0
1	1	2009	1	0	0	0	0	0	0	0	0	0	0	0	0	1	1		0	0	0	0	0	0	0	0	0	0	0
1	1	2009	1	0	0	0	0	0	0	0	0	0	0	0	0	1	1		0	0	0	0	0	0	0	0	0	0	0
1	1	2009	1	0	0	0	0	0	0	0	0	0	0	0	0	1	1		0	0	0	0	0	0	0	0	0	0	0
1	1	2009	1	0	0	0	0	0	0	0	0	0	0	0	0	1	1		0	0	0	0	0	0	0	0	0	0	0
1	1	2009	1	0	0	0	0	0	0	0	0	0	0	0	0	1	1		0	0	0	0	0	0	0	0	0	0	0
1	1	2009	1	0	0	0	0	0	0	0	0	0	0	0	0	1	1		0	0	0	0	0	0	0	0	0	0	0
1	1	2009	1	0	0	0	0	0	0	0	0	0	0	0	0	1	1		0	0	0	0	0	0	0	0	0	0	0
1	1	2009	1	0	0	0	0	0	0	0	0	0	0	0	0	1	1		0	0	0	0	0	0	0	0	0	0	0
1	1	2009	1	0	0	0	0	0	0	0	0	0	0	0	0	1	1		0	0	0	0	0	0	0	0	0	0	0
1	1	2009	1	0	0	0	0	0	0	0	0	0	0	0	0	1	1		0	0	0	0	0	0	0	0	0	0	0
1	1	2009	1	0	0	0	0	0	0	0	0	0	0	0	0	1	1		0	0	0	0	0	0	0	0	0	0	0
1	1	2009	1	0	0	0	0	0	0	0	0	0	0	0	0	1	1		0	0	0	0	0	0	0	0	0	0	0
1	1	2009	1	0	0	0	0	0	0	0	0	0	0	0	0	1	1		0	0	0	0	0	0	0	0	0	0	0
1	1	2009	1	0	0	0	0	0	0	0	0	0	0	0	0	1	1		0	0	0	0	0	0	0	0	0	0	0
1	1	2009	1	0	0	0	0	0	0	0	0	0	0	0	0	1	1		0	0	0	0	0	0	0	0	0	0	0
1	1	2009	1	0	0	0	0	0	0	0	0	0	0	0	0	1	1		0	0	0	0	0	0	0	0	0	0	0
1	1	2009	1	0	0	0	0	0	0	0	0	0	0	0	0	1	1		0	0	0	0	0	0	0	0	0	0	0
1	1	2009	1	0	0	0	0	0	0	0	0	0	0	0	0	1	1		0	0	0	0	0	0	0	0	0	0	0
1	1	2009	1	0	0	0	0	0	0	0	0	0	0	0	0	1	1		0	0	0	0	0	0	0	0	0	0	0
1	1	2009	1	0	0	0	0	0	0	0	0	0	0	0	0	1	1		0	0	0	0	0	0	0	0	0	0	0
1	1	2009	1	0	0	0	0	0	0	0	0	0	0	0	0	1	1		0	0	0	0	0	0	0	0	0	0	0
1	1	2009	1	0	0	0	0	0	0	0	0	0	0	0	0	1	1		0	0	0	0	0	0	0	0	0	0	0
1	1	2009	1	0	0	0	0	0	0	0	0	0	0	0	0	1	1		0	0	0	0	0	0	0	0	0	0	0
1	1	2009	1	0	0	0	0	0	0	0	0	0	0	0	0	1	1		0	0	0	0	0	0	0	0	0	0	0
1	1	2009	1	0	0	0	0	0	0	0	0	0	0	0	0	1	1		0	0	0	0	0	0	0	0	0	0	0
1	1	2009	1	0	0	0	0	0	0	0	0	0	0	0	0	1	1		0	0	0	0	0	0	0	0	0	0	0
1	1	2009	1	0	0	0	0	0	0	0	0	0	0	0	0	1	1		0	0	0	0	0	0	0	0	0	0	0
1	1	2009	1	0	0	0	0	0	0	0	0	0	0	0	0	1	1		0	0	0	0	0	0	0	0	0	0	0
1	1	2009	1	0	0	0	0	0	0	0	0	0	0	0	0	1	1		0	0	0	0	0	0	0	0	0	0	0
1	1	2009	1	0	0	0	0	0	0	0	0	0	0	0	0	1	1		0	0	0	0	0	0	0	0	0	0	0
1	1	2009	1	0	0	0	0	0	0	0	0	0	0	0	0	1	1		0	0	0	0	0	0	0	0	0	0	0
1	1	2009	1	0	0	0	0	0	0	0	0	0	0	0	0	1	1		0	0	0	0	0	0	0	0	0	0	0
1	1	2009	1	0	0	0	0	0	0	0	0	0	0	0	0	1	1		0	0	0	0	0	0	0	0	0	0	0
1	1	2009	1	0	0	0	0	0	0	0	0	0	0	0	0	1	1		0	0	0	0	0	0	0	0	0	0	0
1	1	2009	1	0	0	0	0	0	0	0	0	0	0	0	0	1	1		0	0	0	0	0	0	0	0	0	0	0
1	1	2009	1	0	0	0	0	0	0	0	0	0	0	0	0	1	1		0	0	0	0	0	0	0	0	0	0	0
1	1	2009	1	0	0	0	0	0	0	0	0	0	0	0	0	1	1		0	0	0	0	0	0	0	0	0	0	0
1	1	2009	1	0	0	0	0	0	0	0	0	0	0	0	0	1	1		0	0	0	0	0	0	0	0	0	0	0
1	1	2009	1	0	0	0	0	0	0	0	0	0	0	0	0	1	1		0	0	0	0	0	0	0	0	0	0	0
1	1	2009	1	0	0	0	0	0	0	0	0	0	0	0	0	1	1		0	0	0	0	0	0	0	0	0	0	0
1	1	2009	1	0	0	0	0	0	0	0	0	0	0	0	0	1	1		0	0	0	0	0	0	0	0	0	0	0
1	1	2009	1	0	0	0	0	0	0	0	0	0	0	0	0	1	1		0	0	0	0	0	0	0	0	0	0	0
1	1	2009	1	0	0	0	0	0	0	0	0	0	0	0	0	1	1		0	0	0	0	0	0	0	0	0	0	0
1	1	2009	1	0	0	0	0	0	0	0	0	0	0	0	0	1	1		0	0	0	0	0	0	0	0	0	0	0
1	1	2009	1	0	0	0	0	0	0	0	0	0	0	0	0	1	1		0	0	0	0	0	0	0	0	0	0	0
1	1	2009	1	0	0	0	0	0	0	0	0	0	0	0	0	1	1		0	0	0	0	0	0	0	0	0	0	0
1	1	2009	1	0	0	0	0	0	0	0	0	0	0	0	0	1	1		0	0	0	0	0	0	0	0	0	0	0
1	1	2009	1	0	0	0	0	0	0	0	0	0	0	0	0	1	1		0	0	0	0	0	0	0	0	0	0	0
1	1	2009	1	0	0	0	0	0	0	0	0	0	0	0	0	1	1		0	0	0	0	0	0	0	0	0	0	0
1	1	2009	1	0	0	0	0	0	0	0	0	0	0	0	0	1	1		0	0	0	0	0	0	0	0	0	0	0
1	1	2009	1	0	0	0	0	0	0	0	0	0	0	0	0	1	1		0	0	0	0	0	0	0	0	0	0	0
1	1	2009	1	0	0	0	0	0	0	0	0	0	0	0	0	1	1		0	0	0	0	0	0	0	0	0	0	0
1	1	2009	1	0	0	0	0	0	0	0	0	0	0	0	0	1	1		0	0	0	0	0	0	0	0	0	0	0
1	1	2009	1	0	0	0	0	0	0	0	0	0	0	0	0	1	1		0	0	0	0	0	0	0	0	0	0	0
1	1	2009	1	0	0	0	0	0	0	0	0	0	0	0	0	1	1		0	0	0	0	0	0	0	0	0	0	0
1	1	2009	1	0	0	0	0	0	0	0	0	0	0	0	0	1	1		0	0	0	0	0	0	0	0	0	0	0
1	1	2009	1	0	0	0	0	0	0	0	0	0	0	0	0	1	1		0	0	0	0	0	0	0	0	0	0	0
1	1	2009	1	0	0	0	0	0	0	0	0	0	0	0	0	1	1		0	0	0	0	0	0	0	0	0	0	0
1	1	2009	1	0	0	0	0	0	0	0	0	0	0	0	0	1	1		0	0	0	0	0	0	0	0	0	0	0
1	1	2009	1	0	0	0	0	0	0	0	0	0	0	0	0	1	1		0	0	0	0	0	0	0	0	0	0	0
1	1	2009	1	0	0	0	0	0	0	0	0	0	0	0	0	1	1		0	0	0	0	0	0	0	0	0	0	0
1	1	2009	1	0	0	0	0	0	0	0	0	0	0	0	0	1	1		0	0	0	0	0	0	0	0	0	0	0
1	1	2009	1	0	0	0	0	0	0	0	0	0	0	0	0	1	1		0	0	0	0	0	0	0	0	0	0	0
1	1	2009	1	0	0	0	0	0	0	0	0	0	0	0	0	1	1		0	0	0	0	0	0	0	0	0	0	0
1	1	2009	1	0	0	0	0	0	0	0	0	0	0	0	0	1	1		0	0	0	0	0	0	0	0	0	0	0
1	1	2009	1	0	0	0	0	0	0	0	0	0	0	0	0	1	1		0	0	0	0	0	0	0	0	0	0	0
1	1	2009	1	0	0	0	0	0	0	0	0	0	0	0	0	1	1		0	0	0	0	0	0	0	0	0	0	0
1	1	2009	1	0	0	0	0	0	0	0	0	0	0	0	0	1	1		0	0	0	0	0	0	0	0	0	0	0
1	1	2009	1	0	0	0	0	0	0	0	0	0	0	0	0	1	1		0	0	0	0	0	0	0	0	0	0	0
1	1	2009	1	0	0	0	0	0	0	0	0	0	0	0	0	1	1		0	0	0	0	0	0	0	0	0	0	0
1	1	2009	1	0	0	0	0	0	0	0	0	0	0	0	0	1	1		0	0	0	0	0	0	0	0	0	0	0
1	1	2009	1	0	0	0	0	0	0	0	0	0	0	0	0	1	1		0	0	0	0	0	0	0	0	0	0	0
1	1	2009	1	0	0	0	0	0	0	0	0	0	0	0	0	1	1		0	0	0	0	0	0	0	0	0	0	0
1	1	2009	1	0	0	0	0	0	0	0	0	0	0	0	0	1	1		0	0	0	0	0	0	0	0	0	0	0
1	1	2009	1	0	0	0	0	0	0	0	0	0	0	0	0	1	1		0	0	0	0	0	0	0	0	0	0	0
1	1	2009	1	0	0	0	0	0	0	0	0	0	0	0	0	1	1		0	0	0	0	0	0	0	0	0	0	0
1	1	2009	1	0	0	0	0	0	0	0	0	0	0	0	0	1	1		0	0	0	0	0	0	0	0	0	0	0
1	1	2009	1	0	0	0	0	0	0	0	0	0	0	0	0	1	1		0	0	0	0	0	0	0	0	0	0	0
1	1	2009	1	0	0	0	0	0	0	0	0	0	0	0	0	1	1		0	0	0	0	0	0	0	0	0	0	0
1	1	2009	1	0	0	0	0	0	0	0	0	0	0	0	0	1	1		0	0	0	0	0	0	0	0	0	0	0
1	1	2009	1	0	0	0	0	0	0	0	0	0	0	0	0	1	1		0	0	0	0	0	0	0	0	0	0	0
1	1	2009	1	0	0	0	0	0	0	0	0	0	0	0	0	1	1		0	0	0	0	0	0	0	0	0	0	0
1	1	2009	1	0	0	0	0	0	0	0	0	0	0	0	0	1	1		0	0	0	0	0	0	0	0	0	0	0
1	1	2009	1	0	0	0	0	0	0	0	0	0	0	0	0	1	1		0	0	0	0	0	0	0	0	0	0	0
1	1	2009	1	0	0	0	0	0	0	0	0	0	0	0	0	1	1		0	0	0	0	0	0	0	0	0	0	0
1	1	2009	1	0	0	0	0	0	0	0	0	0	0	0	0	1	1		0	0	0	0	0	0	0	0	0	0	0
1	1	2009	1	0	0	0	0	0	0	0	0	0	0	0	0	1	1		0	0	0	0	0	0	0	0	0	0	0
1	1	2009	1	0	0	0	0	0	0	0	0	0	0	0	0	1	1		0	0	0	0	0	0	0	0	0	0	0
1	1	2009	1	0	0	0	0	0	0	0	0	0	0	0	0	1	1		0	0	0	0	0	0	0	0	0	0	0
1	1	2009	1	0	0	0	0	0	0	0	0	0	0	0	0	1	1		0	0	0	0	0	0	0	0	0	0	0
1	2	2009	1	0	0	0	0	0	1	0	0	0	0	1	1	2	1		1	0	0	0	0	0	1	0	0	0	0	1						1
1	2	2009	1	0	0	0	0	1	0	0	0	0	0	1	1	2	1		1	0	0	0	0	1	0	0	0	0	0	1					1
1	2	2009	1	0	0	0	0	0	1	0	0	0	0	1	1	2	1		1	0	0	0	0	0	1	0	0	0	0	1						1
1	2	2009	1	1	0	0	0	0	0	0	0	0	0	1	1	1	1		1	1	0	0	0	0	0	0	0	0	0	1	1
1	2	2009	1	0	1	0	0	0	0	0	0	0	0	1	1	2	1		1	0	1	0	0	0	0	0	0	0	0	1		1
1	2	2009	1	0	1	0	0	0	0	0	0	0	0	1	1	2	1		1	0	1	0	0	0	0	0	0	0	0	1		1
1	2	2009	1	0	1	0	0	0	0	0	0	0	0	1	1	2	1		1	0	1	0	0	0	0	0	0	0	0	1		1
1	2	2009	1	1	0	0	0	0	0	0	0	0	0	1	1	1	1		1	1	0	0	0	0	0	0	0	0	0	1	1
1	2	2009	1	0	1	0	0	0	0	0	0	0	0	1	1	1	1		1	0	1	0	0	0	0	0	0	0	0	1		1
1	2	2009	1	0	1	0	0	0	0	0	0	0	0	1	1	1	1		1	0	1	0	0	0	0	0	0	0	0	1		1
1	2	2009	1	0	0	0	0	0	0	0	0	1	0	1	1	1	1		1	0	0	0	0	0	0	0	0	1	0	1									1
1	2	2009	1	0	0	0	0	1	0	0	0	0	0	1	1	1	1		1	0	0	0	0	1	0	0	0	0	0	1					1
1	2	2009	1	0	1	0	0	0	0	0	0	0	0	1	1	1	1		1	0	1	0	0	0	0	0	0	0	0	1		1
1	2	2009	1	0	0	0	0	0	0	0	0	0	0	0	0	1	1		0	0	0	0	0	0	0	0	0	0	0
1	2	2009	1	0	0	0	0	0	0	0	0	0	0	0	0	1	1		0	0	0	0	0	0	0	0	0	0	0
1	2	2009	1	0	0	0	0	0	0	0	0	0	0	0	0	1	1		0	0	0	0	0	0	0	0	0	0	0
1	2	2009	1	0	0	0	0	0	0	0	0	0	0	0	0	1	1		0	0	0	0	0	0	0	0	0	0	0
1	2	2009	1	0	0	0	0	0	0	0	0	0	0	0	0	1	1		0	0	0	0	0	0	0	0	0	0	0
1	2	2009	1	0	0	0	0	0	0	0	0	0	0	0	0	1	1		0	0	0	0	0	0	0	0	0	0	0
1	2	2009	1	0	0	0	0	0	0	0	0	0	0	0	0	1	1		0	0	0	0	0	0	0	0	0	0	0
1	2	2009	1	0	0	0	0	0	0	0	0	0	0	0	0	1	1		0	0	0	0	0	0	0	0	0	0	0
1	2	2009	1	0	0	0	0	0	0	0	0	0	0	0	0	1	1		0	0	0	0	0	0	0	0	0	0	0
1	2	2009	1	0	0	0	0	0	0	0	0	0	0	0	0	1	1		0	0	0	0	0	0	0	0	0	0	0
1	2	2009	1	0	0	0	0	0	0	0	0	0	0	0	0	1	1		0	0	0	0	0	0	0	0	0	0	0
1	2	2009	1	0	0	0	0	0	0	0	0	0	0	0	0	1	1		0	0	0	0	0	0	0	0	0	0	0
1	2	2009	1	0	0	0	0	0	0	0	0	0	0	0	0	1	1		0	0	0	0	0	0	0	0	0	0	0
1	2	2009	1	0	0	0	0	0	0	0	0	0	0	0	0	1	1		0	0	0	0	0	0	0	0	0	0	0
1	2	2009	1	0	0	0	0	0	0	0	0	0	0	0	0	1	1		0	0	0	0	0	0	0	0	0	0	0
1	2	2009	1	0	0	0	0	0	0	0	0	0	0	0	0	1	1		0	0	0	0	0	0	0	0	0	0	0
1	2	2009	1	0	0	0	0	0	0	0	0	0	0	0	0	1	1		0	0	0	0	0	0	0	0	0	0	0
1	2	2009	1	0	0	0	0	0	0	0	0	0	0	0	0	1	1		0	0	0	0	0	0	0	0	0	0	0
1	2	2009	1	0	0	0	0	0	0	0	0	0	0	0	0	1	1		0	0	0	0	0	0	0	0	0	0	0
1	2	2009	1	0	0	0	0	0	0	0	0	0	0	0	0	1	1		0	0	0	0	0	0	0	0	0	0	0
1	2	2009	1	0	0	0	0	0	0	0	0	0	0	0	0	1	1		0	0	0	0	0	0	0	0	0	0	0
1	2	2009	1	0	0	0	0	0	0	0	0	0	0	0	0	1	1		0	0	0	0	0	0	0	0	0	0	0
1	2	2009	1	0	0	0	0	0	0	0	0	0	0	0	0	1	1		0	0	0	0	0	0	0	0	0	0	0
1	2	2009	1	0	0	0	0	0	0	0	0	0	0	0	0	1	1		0	0	0	0	0	0	0	0	0	0	0
1	2	2009	1	0	0	0	0	0	0	0	0	0	0	0	0	1	1		0	0	0	0	0	0	0	0	0	0	0
1	2	2009	1	0	0	0	0	0	0	0	0	0	0	0	0	1	1		0	0	0	0	0	0	0	0	0	0	0
1	2	2009	1	0	0	0	0	0	0	0	0	0	0	0	0	1	1		0	0	0	0	0	0	0	0	0	0	0
1	2	2009	1	0	0	0	0	0	0	0	0	0	0	0	0	1	1		0	0	0	0	0	0	0	0	0	0	0
1	2	2009	1	0	0	0	0	0	0	0	0	0	0	0	0	1	1		0	0	0	0	0	0	0	0	0	0	0
1	2	2009	1	0	0	0	0	0	0	0	0	0	0	0	0	1	1		0	0	0	0	0	0	0	0	0	0	0
1	2	2009	1	0	0	0	0	0	0	0	0	0	0	0	0	1	1		0	0	0	0	0	0	0	0	0	0	0
1	2	2009	1	0	0	0	0	0	0	0	0	0	0	0	0	1	1		0	0	0	0	0	0	0	0	0	0	0
1	2	2009	1	0	0	0	0	0	0	0	0	0	0	0	0	1	1		0	0	0	0	0	0	0	0	0	0	0
1	2	2009	1	0	0	0	0	0	0	0	0	0	0	0	0	1	1		0	0	0	0	0	0	0	0	0	0	0
1	2	2009	1	0	0	0	0	0	0	0	0	0	0	0	0	1	1		0	0	0	0	0	0	0	0	0	0	0
1	2	2009	1	0	0	0	0	0	0	0	0	0	0	0	0	1	1		0	0	0	0	0	0	0	0	0	0	0
1	2	2009	1	0	0	0	0	0	0	0	0	0	0	0	0	1	1		0	0	0	0	0	0	0	0	0	0	0
1	2	2009	1	0	0	0	0	0	0	0	0	0	0	0	0	1	1		0	0	0	0	0	0	0	0	0	0	0
1	2	2009	1	0	0	0	0	0	0	0	0	0	0	0	0	1	1		0	0	0	0	0	0	0	0	0	0	0
1	2	2009	1	0	0	0	0	0	0	0	0	0	0	0	0	1	1		0	0	0	0	0	0	0	0	0	0	0
1	2	2009	1	0	0	0	0	0	0	0	0	0	0	0	0	1	1		0	0	0	0	0	0	0	0	0	0	0
1	2	2009	1	0	0	0	0	0	0	0	0	0	0	0	0	1	1		0	0	0	0	0	0	0	0	0	0	0
1	2	2009	1	0	0	0	0	0	0	0	0	0	0	0	0	1	1		0	0	0	0	0	0	0	0	0	0	0
1	2	2009	1	0	0	0	0	0	0	0	0	0	0	0	0	1	1		0	0	0	0	0	0	0	0	0	0	0
1	2	2009	1	0	0	0	0	0	0	0	0	0	0	0	0	1	1		0	0	0	0	0	0	0	0	0	0	0
1	2	2009	1	0	0	0	0	0	0	0	0	0	0	0	0	1	1		0	0	0	0	0	0	0	0	0	0	0
1	2	2009	1	0	0	0	0	0	0	0	0	0	0	0	0	1	1		0	0	0	0	0	0	0	0	0	0	0
1	2	2009	1	0	0	0	0	0	0	0	0	0	0	0	0	1	1		0	0	0	0	0	0	0	0	0	0	0
1	2	2009	1	0	0	0	0	0	0	0	0	0	0	0	0	1	1		0	0	0	0	0	0	0	0	0	0	0
1	2	2009	1	0	0	0	0	0	0	0	0	0	0	0	0	1	1		0	0	0	0	0	0	0	0	0	0	0
1	2	2009	1	0	0	0	0	0	0	0	0	0	0	0	0	1	1		0	0	0	0	0	0	0	0	0	0	0
1	2	2009	1	0	0	0	0	0	0	0	0	0	0	0	0	1	1		0	0	0	0	0	0	0	0	0	0	0
1	2	2009	1	0	0	0	0	0	0	0	0	0	0	0	0	1	1		0	0	0	0	0	0	0	0	0	0	0
1	2	2009	1	0	0	0	0	0	0	0	0	0	0	0	0	1	1		0	0	0	0	0	0	0	0	0	0	0
1	2	2009	1	0	0	0	0	0	0	0	0	0	0	0	0	1	1		0	0	0	0	0	0	0	0	0	0	0
1	2	2009	1	0	0	0	0	0	0	0	0	0	0	0	0	1	1		0	0	0	0	0	0	0	0	0	0	0
1	2	2009	1	0	0	0	0	0	0	0	0	0	0	0	0	1	1		0	0	0	0	0	0	0	0	0	0	0
1	2	2009	1	0	0	0	0	0	0	0	0	0	0	0	0	1	1		0	0	0	0	0	0	0	0	0	0	0
1	2	2009	1	0	0	0	0	0	0	0	0	0	0	0	0	1	1		0	0	0	0	0	0	0	0	0	0	0
1	2	2009	1	0	0	0	0	0	0	0	0	0	0	0	0	1	1		0	0	0	0	0	0	0	0	0	0	0
1	2	2009	1	0	0	0	0	0	0	0	0	0	0	0	0	1	1		0	0	0	0	0	0	0	0	0	0	0
1	2	2009	1	0	0	0	0	0	0	0	0	0	0	0	0	1	1		0	0	0	0	0	0	0	0	0	0	0
1	2	2009	1	0	0	0	0	0	0	0	0	0	0	0	0	1	1		0	0	0	0	0	0	0	0	0	0	0
1	2	2009	1	0	0	0	0	0	0	0	0	0	0	0	0	1	1		0	0	0	0	0	0	0	0	0	0	0
1	2	2009	1	0	0	0	0	0	0	0	0	0	0	0	0	1	1		0	0	0	0	0	0	0	0	0	0	0
1	2	2009	1	0	0	0	0	0	0	0	0	0	0	0	0	1	1		0	0	0	0	0	0	0	0	0	0	0
1	2	2009	1	0	0	0	0	0	0	0	0	0	0	0	0	1	1		0	0	0	0	0	0	0	0	0	0	0
1	2	2009	1	0	0	0	0	0	0	0	0	0	0	0	0	1	1		0	0	0	0	0	0	0	0	0	0	0
1	2	2009	1	0	0	0	0	0	0	0	0	0	0	0	0	1	1		0	0	0	0	0	0	0	0	0	0	0
1	2	2009	1	0	0	0	0	0	0	0	0	0	0	0	0	1	1		0	0	0	0	0	0	0	0	0	0	0
1	2	2009	1	0	0	0	0	0	0	0	0	0	0	0	0	1	1		0	0	0	0	0	0	0	0	0	0	0
1	2	2009	1	0	0	0	0	0	0	0	0	0	0	0	0	1	1		0	0	0	0	0	0	0	0	0	0	0
1	2	2009	1	0	0	0	0	0	0	0	0	0	0	0	0	1	1		0	0	0	0	0	0	0	0	0	0	0
1	2	2009	1	0	0	0	0	0	0	0	0	0	0	0	0	1	1		0	0	0	0	0	0	0	0	0	0	0
1	2	2009	1	0	0	0	0	0	0	0	0	0	0	0	0	1	1		0	0	0	0	0	0	0	0	0	0	0
1	2	2009	1	0	0	0	0	0	0	0	0	0	0	0	0	1	1		0	0	0	0	0	0	0	0	0	0	0
1	2	2009	1	0	0	0	0	0	0	0	0	0	0	0	0	1	1		0	0	0	0	0	0	0	0	0	0	0
1	2	2009	1	0	0	0	0	0	0	0	0	0	0	0	0	1	1		0	0	0	0	0	0	0	0	0	0	0
1	2	2009	1	0	0	0	0	0	0	0	0	0	0	0	0	1	1		0	0	0	0	0	0	0	0	0	0	0
1	2	2009	1	0	0	0	0	0	0	0	0	0	0	0	0	1	1		0	0	0	0	0	0	0	0	0	0	0
1	2	2009	1	0	0	0	0	0	0	0	0	0	0	0	0	1	1		0	0	0	0	0	0	0	0	0	0	0
1	2	2009	1	0	0	0	0	0	0	0	0	0	0	0	0	1	1		0	0	0	0	0	0	0	0	0	0	0
1	2	2009	1	0	0	0	0	0	0	0	0	0	0	0	0	1	1		0	0	0	0	0	0	0	0	0	0	0
1	2	2009	1	0	0	0	0	0	0	0	0	0	0	0	0	1	1		0	0	0	0	0	0	0	0	0	0	0
1	2	2009	1	0	0	0	0	0	0	0	0	0	0	0	0	1	1		0	0	0	0	0	0	0	0	0	0	0
1	2	2009	1	0	0	0	0	0	0	0	0	0	0	0	0	1	1		0	0	0	0	0	0	0	0	0	0	0
1	2	2009	1	0	0	0	0	0	0	0	0	0	0	0	0	1	1		0	0	0	0	0	0	0	0	0	0	0
1	2	2009	1	0	0	0	0	0	0	0	0	0	0	0	0	1	1		0	0	0	0	0	0	0	0	0	0	0
1	2	2009	1	0	0	0	0	0	0	0	0	0	0	0	0	1	1		0	0	0	0	0	0	0	0	0	0	0
1	2	2009	1	0	0	0	0	0	0	0	0	0	0	0	0	1	1		0	0	0	0	0	0	0	0	0	0	0
1	2	2009	1	0	0	0	0	0	0	0	0	0	0	0	0	1	1		0	0	0	0	0	0	0	0	0	0	0
1	2	2009	1	0	0	0	0	0	0	0	0	0	0	0	0	1	1		0	0	0	0	0	0	0	0	0	0	0
1	2	2009	1	0	0	0	0	0	0	0	0	0	0	0	0	1	1		0	0	0	0	0	0	0	0	0	0	0
1	2	2009	1	0	0	0	0	0	0	0	0	0	0	0	0	1	1		0	0	0	0	0	0	0	0	0	0	0
1	2	2009	1	0	0	0	0	0	0	0	0	0	0	0	0	1	1		0	0	0	0	0	0	0	0	0	0	0
1	2	2009	1	0	0	0	0	0	0	0	0	0	0	0	0	1	1		0	0	0	0	0	0	0	0	0	0	0
1	2	2009	1	0	0	0	0	0	0	0	0	0	0	0	0	1	1		0	0	0	0	0	0	0	0	0	0	0
1	2	2009	1	0	0	0	0	0	0	0	0	0	0	0	0	1	1		0	0	0	0	0	0	0	0	0	0	0
1	2	2009	1	0	0	0	0	0	0	0	0	0	0	0	0	1	1		0	0	0	0	0	0	0	0	0	0	0
1	2	2009	1	0	0	0	0	0	0	0	0	0	0	0	0	1	1		0	0	0	0	0	0	0	0	0	0	0
1	2	2009	1	0	0	0	0	0	0	0	0	0	0	0	0	1	1		0	0	0	0	0	0	0	0	0	0	0
1	2	2009	1	0	0	0	0	0	0	0	0	0	0	0	0	1	1		0	0	0	0	0	0	0	0	0	0	0
1	2	2009	1	0	0	0	0	0	0	0	0	0	0	0	0	1	1		0	0	0	0	0	0	0	0	0	0	0
1	2	2009	1	0	0	0	0	0	0	0	0	0	0	0	0	1	1		0	0	0	0	0	0	0	0	0	0	0
1	2	2009	1	0	0	0	0	0	0	0	0	0	0	0	0	1	1		0	0	0	0	0	0	0	0	0	0	0
1	2	2009	1	0	0	0	0	0	0	0	0	0	0	0	0	1	1		0	0	0	0	0	0	0	0	0	0	0
1	2	2009	1	0	0	0	0	0	0	0	0	0	0	0	0	1	1		0	0	0	0	0	0	0	0	0	0	0
1	2	2009	1	0	0	0	0	0	0	0	0	0	0	0	0	1	1		0	0	0	0	0	0	0	0	0	0	0
1	2	2009	1	0	0	0	0	0	0	0	0	0	0	0	0	1	1		0	0	0	0	0	0	0	0	0	0	0
1	2	2009	1	0	0	0	0	0	0	0	0	0	0	0	0	1	1		0	0	0	0	0	0	0	0	0	0	0
1	2	2009	1	0	0	0	0	0	0	0	0	0	0	0	0	1	1		0	0	0	0	0	0	0	0	0	0	0
1	2	2009	1	0	0	0	0	0	0	0	0	0	0	0	0	1	1		0	0	0	0	0	0	0	0	0	0	0
1	2	2009	1	0	0	0	0	0	0	0	0	0	0	0	0	1	1		0	0	0	0	0	0	0	0	0	0	0
1	2	2009	1	0	0	0	0	0	0	0	0	0	0	0	0	1	1		0	0	0	0	0	0	0	0	0	0	0
1	2	2009	1	0	0	0	0	0	0	0	0	0	0	0	0	1	1		0	0	0	0	0	0	0	0	0	0	0
1	2	2009	1	0	0	0	0	0	0	0	0	0	0	0	0	1	1		0	0	0	0	0	0	0	0	0	0	0
1	2	2009	1	0	0	0	0	0	0	0	0	0	0	0	0	1	1		0	0	0	0	0	0	0	0	0	0	0
1	2	2009	1	0	0	0	0	0	0	0	0	0	0	0	0	1	1		0	0	0	0	0	0	0	0	0	0	0
1	2	2009	1	0	0	0	0	0	0	0	0	0	0	0	0	1	1		0	0	0	0	0	0	0	0	0	0	0
1	2	2009	1	0	0	0	0	0	0	0	0	0	0	0	0	1	1		0	0	0	0	0	0	0	0	0	0	0
1	2	2009	1	0	0	0	0	0	0	0	0	0	0	0	0	1	1		0	0	0	0	0	0	0	0	0	0	0
1	2	2009	1	0	0	0	0	0	0	0	0	0	0	0	0	1	1		0	0	0	0	0	0	0	0	0	0	0
1	2	2009	1	0	0	0	0	0	0	0	0	0	0	0	0	1	1		0	0	0	0	0	0	0	0	0	0	0
1	2	2009	1	0	0	0	0	0	0	0	0	0	0	0	0	1	1		0	0	0	0	0	0	0	0	0	0	0
1	2	2009	1	0	0	0	0	0	0	0	0	0	0	0	0	1	1		0	0	0	0	0	0	0	0	0	0	0
1	2	2009	1	0	0	0	0	0	0	0	0	0	0	0	0	1	1		0	0	0	0	0	0	0	0	0	0	0
1	2	2009	1	0	0	0	0	0	0	0	0	0	0	0	0	1	1		0	0	0	0	0	0	0	0	0	0	0
1	2	2009	1	0	0	0	0	0	0	0	0	0	0	0	0	1	1		0	0	0	0	0	0	0	0	0	0	0
1	2	2009	1	0	0	0	0	0	0	0	0	0	0	0	0	1	1		0	0	0	0	0	0	0	0	0	0	0
1	2	2009	1	0	0	0	0	0	0	0	0	0	0	0	0	1	1		0	0	0	0	0	0	0	0	0	0	0
1	2	2009	1	0	0	0	0	0	0	0	0	0	0	0	0	1	1		0	0	0	0	0	0	0	0	0	0	0
1	2	2009	1	0	0	0	0	0	0	0	0	0	0	0	0	1	1		0	0	0	0	0	0	0	0	0	0	0
1	2	2009	1	0	0	0	0	0	0	0	0	0	0	0	0	1	1		0	0	0	0	0	0	0	0	0	0	0
1	2	2009	1	0	0	0	0	0	0	0	0	0	0	0	0	1	1		0	0	0	0	0	0	0	0	0	0	0
1	2	2009	1	0	0	0	0	0	0	0	0	0	0	0	0	1	1		0	0	0	0	0	0	0	0	0	0	0
1	2	2009	1	0	0	0	0	0	0	0	0	0	0	0	0	1	1		0	0	0	0	0	0	0	0	0	0	0
1	2	2009	1	0	0	0	0	0	0	0	0	0	0	0	0	1	1		0	0	0	0	0	0	0	0	0	0	0
1	2	2009	1	0	0	0	0	0	0	0	0	0	0	0	0	1	1		0	0	0	0	0	0	0	0	0	0	0
1	2	2009	1	0	0	0	0	0	0	0	0	0	0	0	0	1	1		0	0	0	0	0	0	0	0	0	0	0
1	2	2009	1	0	0	0	0	0	0	0	0	0	0	0	0	1	1		0	0	0	0	0	0	0	0	0	0	0
1	2	2009	1	0	0	0	0	0	0	0	0	0	0	0	0	1	1		0	0	0	0	0	0	0	0	0	0	0
1	2	2009	1	0	0	0	0	0	0	0	0	0	0	0	0	1	1		0	0	0	0	0	0	0	0	0	0	0
1	2	2009	1	0	0	0	0	0	0	0	0	0	0	0	0	1	1		0	0	0	0	0	0	0	0	0	0	0
1	2	2009	1	0	0	0	0	0	0	0	0	0	0	0	0	1	1		0	0	0	0	0	0	0	0	0	0	0
1	2	2009	1	0	0	0	0	0	0	0	0	0	0	0	0	1	1		0	0	0	0	0	0	0	0	0	0	0
1	2	2009	1	0	0	0	0	0	0	0	0	0	0	0	0	1	1		0	0	0	0	0	0	0	0	0	0	0
1	2	2009	1	0	0	0	0	0	0	0	0	0	0	0	0	1	1		0	0	0	0	0	0	0	0	0	0	0
1	2	2009	1	0	0	0	0	0	0	0	0	0	0	0	0	1	1		0	0	0	0	0	0	0	0	0	0	0
1	2	2009	1	0	0	0	0	0	0	0	0	0	0	0	0	2	1		0	0	0	0	0	0	0	0	0	0	0
1	2	2009	1	0	0	0	0	0	0	0	0	0	0	0	0	2	1		0	0	0	0	0	0	0	0	0	0	0
1	2	2009	1	0	0	0	0	0	0	0	0	0	0	0	0	2	1		0	0	0	0	0	0	0	0	0	0	0
1	2	2009	1	0	0	0	0	0	0	0	0	0	0	0	0	2	1		0	0	0	0	0	0	0	0	0	0	0
1	2	2009	1	0	0	0	0	0	0	0	0	0	0	0	0	2	1		0	0	0	0	0	0	0	0	0	0	0
1	2	2009	1	0	0	0	0	0	0	0	0	0	0	0	0	2	1		0	0	0	0	0	0	0	0	0	0	0
1	2	2009	1	0	0	0	0	0	0	0	0	0	0	0	0	2	1		0	0	0	0	0	0	0	0	0	0	0
1	2	2009	1	0	0	0	0	0	0	0	0	0	0	0	0	2	1		0	0	0	0	0	0	0	0	0	0	0
1	2	2009	1	0	0	0	0	0	0	0	0	0	0	0	0	2	1		0	0	0	0	0	0	0	0	0	0	0
1	2	2009	1	0	0	0	0	0	0	0	0	0	0	0	0	2	1		0	0	0	0	0	0	0	0	0	0	0
1	2	2009	1	0	0	0	0	0	0	0	0	0	0	0	0	2	1		0	0	0	0	0	0	0	0	0	0	0
1	2	2009	1	0	0	0	0	0	0	0	0	0	0	0	0	2	1		0	0	0	0	0	0	0	0	0	0	0
1	2	2009	1	0	0	0	0	0	0	0	0	0	0	0	0	2	1		0	0	0	0	0	0	0	0	0	0	0
1	2	2009	1	0	0	0	0	0	0	0	0	0	0	0	0	2	1		0	0	0	0	0	0	0	0	0	0	0
1	2	2009	1	0	0	0	0	0	0	0	0	0	0	0	0	2	1		0	0	0	0	0	0	0	0	0	0	0
1	2	2009	1	0	0	0	0	0	0	0	0	0	0	0	0	2	1		0	0	0	0	0	0	0	0	0	0	0
1	2	2009	1	0	0	0	0	0	0	0	0	0	0	0	0	2	1		0	0	0	0	0	0	0	0	0	0	0
1	2	2009	1	0	0	0	0	0	0	0	0	0	0	0	0	2	1		0	0	0	0	0	0	0	0	0	0	0
1	2	2009	1	0	0	0	0	0	0	0	0	0	0	0	0	2	1		0	0	0	0	0	0	0	0	0	0	0
1	2	2009	1	0	0	0	0	0	0	0	0	0	0	0	0	2	1		0	0	0	0	0	0	0	0	0	0	0
1	2	2009	1	0	0	0	0	0	0	0	0	0	0	0	0	2	1		0	0	0	0	0	0	0	0	0	0	0
1	2	2009	1	0	0	0	0	0	0	0	0	0	0	0	0	2	1		0	0	0	0	0	0	0	0	0	0	0
1	2	2009	1	0	0	0	0	0	0	0	0	0	0	0	0	2	1		0	0	0	0	0	0	0	0	0	0	0
1	2	2009	1	0	0	0	0	0	0	0	0	0	0	0	0	2	1		0	0	0	0	0	0	0	0	0	0	0
1	2	2009	1	0	0	0	0	0	0	0	0	0	0	0	0	2	1		0	0	0	0	0	0	0	0	0	0	0
1	2	2009	1	0	0	0	0	0	0	0	0	0	0	0	0	2	1		0	0	0	0	0	0	0	0	0	0	0
1	2	2009	1	0	0	0	0	0	0	0	0	0	0	0	0	2	1		0	0	0	0	0	0	0	0	0	0	0
1	2	2009	1	0	0	0	0	0	0	0	0	0	0	0	0	2	1		0	0	0	0	0	0	0	0	0	0	0
1	2	2009	1	0	0	0	0	0	0	0	0	0	0	0	0	2	1		0	0	0	0	0	0	0	0	0	0	0
1	2	2009	1	0	0	0	0	0	0	0	0	0	0	0	0	2	1		0	0	0	0	0	0	0	0	0	0	0
1	2	2009	1	0	0	0	0	0	0	0	0	0	0	0	0	2	1		0	0	0	0	0	0	0	0	0	0	0
1	2	2009	1	0	0	0	0	0	0	0	0	0	0	0	0	2	1		0	0	0	0	0	0	0	0	0	0	0
1	2	2009	1	0	0	0	0	0	0	0	0	0	0	0	0	2	1		0	0	0	0	0	0	0	0	0	0	0
1	2	2009	1	0	0	0	0	0	0	0	0	0	0	0	0	2	1		0	0	0	0	0	0	0	0	0	0	0
1	2	2009	1	0	0	0	0	0	0	0	0	0	0	0	0	2	1		0	0	0	0	0	0	0	0	0	0	0
1	2	2009	1	0	0	0	0	0	0	0	0	0	0	0	0	2	1		0	0	0	0	0	0	0	0	0	0	0
1	2	2009	1	0	0	0	0	0	0	0	0	0	0	0	0	2	1		0	0	0	0	0	0	0	0	0	0	0
1	2	2009	1	0	0	0	0	0	0	0	0	0	0	0	0	2	1		0	0	0	0	0	0	0	0	0	0	0
1	2	2009	1	0	0	0	0	0	0	0	0	0	0	0	0	2	1		0	0	0	0	0	0	0	0	0	0	0
1	2	2009	1	0	0	0	0	0	0	0	0	0	0	0	0	2	1		0	0	0	0	0	0	0	0	0	0	0
1	2	2009	1	0	0	0	0	0	0	0	0	0	0	0	0	2	1		0	0	0	0	0	0	0	0	0	0	0
1	2	2009	1	0	0	0	0	0	0	0	0	0	0	0	0	2	1		0	0	0	0	0	0	0	0	0	0	0
1	2	2009	1	0	0	0	0	0	0	0	0	0	0	0	0	2	1		0	0	0	0	0	0	0	0	0	0	0
1	2	2009	1	0	0	0	0	0	0	0	0	0	0	0	0	2	1		0	0	0	0	0	0	0	0	0	0	0
1	2	2009	1	0	0	0	0	0	0	0	0	0	0	0	0	2	1		0	0	0	0	0	0	0	0	0	0	0
1	2	2009	1	0	0	0	0	0	0	0	0	0	0	0	0	2	1		0	0	0	0	0	0	0	0	0	0	0
1	2	2009	1	0	0	0	0	0	0	0	0	0	0	0	0	2	1		0	0	0	0	0	0	0	0	0	0	0
1	2	2009	1	0	0	0	0	0	0	0	0	0	0	0	0	2	1		0	0	0	0	0	0	0	0	0	0	0
1	2	2009	1	0	0	0	0	0	0	0	0	0	0	0	0	2	1		0	0	0	0	0	0	0	0	0	0	0
1	2	2009	1	0	0	0	0	0	0	0	0	0	0	0	0	2	1		0	0	0	0	0	0	0	0	0	0	0
1	2	2009	1	0	0	0	0	0	0	0	0	0	0	0	0	2	1		0	0	0	0	0	0	0	0	0	0	0
1	2	2009	1	0	0	0	0	0	0	0	0	0	0	0	0	2	1		0	0	0	0	0	0	0	0	0	0	0
1	2	2009	1	0	0	0	0	0	0	0	0	0	0	0	0	2	1		0	0	0	0	0	0	0	0	0	0	0
1	2	2009	1	0	0	0	0	0	0	0	0	0	0	0	0	2	1		0	0	0	0	0	0	0	0	0	0	0
1	2	2009	1	0	0	0	0	0	0	0	0	0	0	0	0	2	1		0	0	0	0	0	0	0	0	0	0	0
1	2	2009	1	0	0	0	0	0	0	0	0	0	0	0	0	2	1		0	0	0	0	0	0	0	0	0	0	0
1	2	2009	1	0	0	0	0	0	0	0	0	0	0	0	0	2	1		0	0	0	0	0	0	0	0	0	0	0
1	2	2009	1	0	0	0	0	0	0	0	0	0	0	0	0	2	1		0	0	0	0	0	0	0	0	0	0	0
1	2	2009	1	0	0	0	0	0	0	0	0	0	0	0	0	2	1		0	0	0	0	0	0	0	0	0	0	0
1	2	2009	1	0	0	0	0	0	0	0	0	0	0	0	0	2	1		0	0	0	0	0	0	0	0	0	0	0
1	2	2009	1	0	0	0	0	0	0	0	0	0	0	0	0	2	1		0	0	0	0	0	0	0	0	0	0	0
1	2	2009	1	0	0	0	0	0	0	0	0	0	0	0	0	2	1		0	0	0	0	0	0	0	0	0	0	0
1	2	2009	1	0	0	0	0	0	0	0	0	0	0	0	0	2	1		0	0	0	0	0	0	0	0	0	0	0
1	2	2009	1	0	0	0	0	0	0	0	0	0	0	0	0	2	1		0	0	0	0	0	0	0	0	0	0	0
1	2	2009	1	0	0	0	0	0	0	0	0	0	0	0	0	2	1		0	0	0	0	0	0	0	0	0	0	0
1	2	2009	1	0	0	0	0	0	0	0	0	0	0	0	0	2	1		0	0	0	0	0	0	0	0	0	0	0
1	2	2009	1	0	0	0	0	0	0	0	0	0	0	0	0	2	1		0	0	0	0	0	0	0	0	0	0	0
1	2	2009	1	0	0	0	0	0	0	0	0	0	0	0	0	2	1		0	0	0	0	0	0	0	0	0	0	0
1	2	2009	1	0	0	0	0	0	0	0	0	0	0	0	0	2	1		0	0	0	0	0	0	0	0	0	0	0
1	2	2009	1	0	0	0	0	0	0	0	0	0	0	0	0	2	1		0	0	0	0	0	0	0	0	0	0	0
1	2	2009	1	0	0	0	0	0	0	0	0	0	0	0	0	2	1		0	0	0	0	0	0	0	0	0	0	0
1	2	2009	1	0	0	0	0	0	0	0	0	0	0	0	0	2	1		0	0	0	0	0	0	0	0	0	0	0
1	2	2009	1	0	0	0	0	0	0	0	0	0	0	0	0	2	1		0	0	0	0	0	0	0	0	0	0	0
1	2	2009	1	0	0	0	0	0	0	0	0	0	0	0	0	2	1		0	0	0	0	0	0	0	0	0	0	0
1	2	2009	1	0	0	0	0	0	0	0	0	0	0	0	0	2	1		0	0	0	0	0	0	0	0	0	0	0
1	2	2009	1	0	0	0	0	0	0	0	0	0	0	0	0	2	1		0	0	0	0	0	0	0	0	0	0	0
1	2	2009	1	0	0	0	0	0	0	0	0	0	0	0	0	2	1		0	0	0	0	0	0	0	0	0	0	0
1	2	2009	1	0	0	0	0	0	0	0	0	0	0	0	0	2	1		0	0	0	0	0	0	0	0	0	0	0
1	2	2009	1	0	0	0	0	0	0	0	0	0	0	0	0	2	1		0	0	0	0	0	0	0	0	0	0	0
1	2	2009	1	0	0	0	0	0	0	0	0	0	0	0	0	2	1		0	0	0	0	0	0	0	0	0	0	0
1	2	2009	1	0	0	0	0	0	0	0	0	0	0	0	0	2	1		0	0	0	0	0	0	0	0	0	0	0
1	2	2009	1	0	0	0	0	0	0	0	0	0	0	0	0	2	1		0	0	0	0	0	0	0	0	0	0	0
1	2	2009	1	0	0	0	0	0	0	0	0	0	0	0	0	2	1		0	0	0	0	0	0	0	0	0	0	0
1	3	2009	1	0	0	1	0	0	0	0	0	0	0	1	1	1	1		1	0	0	1	0	0	0	0	0	0	0	1			1
1	3	2009	1	0	0	0	0	0	0	0	0	0	0	0	0	1	1		0	0	0	0	0	0	0	0	0	0	0
1	3	2009	1	0	0	0	0	0	0	0	0	0	0	0	0	1	1		0	0	0	0	0	0	0	0	0	0	0
1	3	2009	1	0	0	0	0	0	0	0	0	0	0	0	0	1	1		0	0	0	0	0	0	0	0	0	0	0
1	3	2009	1	0	0	0	0	0	0	0	0	0	0	0	0	1	1		0	0	0	0	0	0	0	0	0	0	0
1	3	2009	1	0	0	0	0	0	0	0	0	0	0	0	0	1	1		0	0	0	0	0	0	0	0	0	0	0
1	3	2009	1	0	0	0	0	0	0	0	0	0	0	0	0	1	1		0	0	0	0	0	0	0	0	0	0	0
1	3	2009	1	0	0	0	0	0	0	0	0	0	0	0	0	1	1		0	0	0	0	0	0	0	0	0	0	0
1	3	2009	1	0	0	0	0	0	0	0	0	0	0	0	0	1	1		0	0	0	0	0	0	0	0	0	0	0
1	3	2009	1	0	0	0	0	0	0	0	0	0	0	0	0	1	1		0	0	0	0	0	0	0	0	0	0	0
1	3	2009	1	0	0	0	0	0	0	0	0	0	0	0	0	1	1		0	0	0	0	0	0	0	0	0	0	0
1	3	2009	1	0	0	0	0	0	0	0	0	0	0	0	0	1	1		0	0	0	0	0	0	0	0	0	0	0
1	3	2009	1	0	0	0	0	0	0	0	0	0	0	0	0	1	1		0	0	0	0	0	0	0	0	0	0	0
1	3	2009	1	0	0	0	0	0	0	0	0	0	0	0	0	1	1		0	0	0	0	0	0	0	0	0	0	0
1	3	2009	1	0	0	0	0	0	0	0	0	0	0	0	0	1	1		0	0	0	0	0	0	0	0	0	0	0
1	3	2009	1	0	0	0	0	0	0	0	0	0	0	0	0	1	1		0	0	0	0	0	0	0	0	0	0	0
1	3	2009	1	0	0	0	0	0	0	0	0	0	0	0	0	1	1		0	0	0	0	0	0	0	0	0	0	0
1	3	2009	1	0	0	0	0	0	0	0	0	0	0	0	0	1	1		0	0	0	0	0	0	0	0	0	0	0
1	3	2009	1	0	0	0	0	0	0	0	0	0	0	0	0	1	1		0	0	0	0	0	0	0	0	0	0	0
1	3	2009	1	0	0	0	0	0	0	0	0	0	0	0	0	1	1		0	0	0	0	0	0	0	0	0	0	0
1	3	2009	1	0	0	0	0	0	0	0	0	0	0	0	0	1	1		0	0	0	0	0	0	0	0	0	0	0
1	3	2009	1	0	0	0	0	0	0	0	0	0	0	0	0	1	1		0	0	0	0	0	0	0	0	0	0	0
1	3	2009	1	0	0	0	0	0	0	0	0	0	0	0	0	1	1		0	0	0	0	0	0	0	0	0	0	0
1	3	2009	1	0	0	0	0	0	0	0	0	0	0	0	0	1	1		0	0	0	0	0	0	0	0	0	0	0
1	3	2009	1	0	0	0	0	0	0	0	0	0	0	0	0	1	1		0	0	0	0	0	0	0	0	0	0	0
1	3	2009	1	0	0	0	0	0	0	0	0	0	0	0	0	1	1		0	0	0	0	0	0	0	0	0	0	0
1	3	2009	1	0	0	0	0	0	0	0	0	0	0	0	0	1	1		0	0	0	0	0	0	0	0	0	0	0
1	3	2009	1	0	0	0	0	0	0	0	0	0	0	0	0	1	1		0	0	0	0	0	0	0	0	0	0	0
1	3	2009	1	0	0	0	0	0	0	0	0	0	0	0	0	1	1		0	0	0	0	0	0	0	0	0	0	0
1	3	2009	1	0	0	0	0	0	0	0	0	0	0	0	0	1	1		0	0	0	0	0	0	0	0	0	0	0
1	3	2009	1	0	0	0	0	0	0	0	0	0	0	0	0	1	1		0	0	0	0	0	0	0	0	0	0	0
1	3	2009	1	0	0	0	0	0	0	0	0	0	0	0	0	1	1		0	0	0	0	0	0	0	0	0	0	0
1	3	2009	1	0	0	0	0	0	0	0	0	0	0	0	0	1	1		0	0	0	0	0	0	0	0	0	0	0
1	3	2009	1	0	0	0	0	0	0	0	0	0	0	0	0	1	1		0	0	0	0	0	0	0	0	0	0	0
1	3	2009	1	0	0	0	0	0	0	0	0	0	0	0	0	1	1		0	0	0	0	0	0	0	0	0	0	0
1	3	2009	1	0	0	0	0	0	0	0	0	0	0	0	0	1	1		0	0	0	0	0	0	0	0	0	0	0
1	3	2009	1	0	0	0	0	0	0	0	0	0	0	0	0	1	1		0	0	0	0	0	0	0	0	0	0	0
1	3	2009	1	0	0	0	0	0	0	0	0	0	0	0	0	1	1		0	0	0	0	0	0	0	0	0	0	0
1	3	2009	1	0	0	0	0	0	0	0	0	0	0	0	0	1	1		0	0	0	0	0	0	0	0	0	0	0
1	3	2009	1	0	0	0	0	0	0	0	0	0	0	0	0	1	1		0	0	0	0	0	0	0	0	0	0	0
1	3	2009	1	0	0	0	0	0	0	0	0	0	0	0	0	1	1		0	0	0	0	0	0	0	0	0	0	0
1	3	2009	1	0	0	0	0	0	0	0	0	0	0	0	0	1	1		0	0	0	0	0	0	0	0	0	0	0
1	3	2009	1	0	0	0	0	0	0	0	0	0	0	0	0	1	1		0	0	0	0	0	0	0	0	0	0	0
1	3	2009	1	0	0	0	0	0	0	0	0	0	0	0	0	1	1		0	0	0	0	0	0	0	0	0	0	0
1	3	2009	1	0	0	0	0	0	0	0	0	0	0	0	0	1	1		0	0	0	0	0	0	0	0	0	0	0
1	3	2009	1	0	0	0	0	0	0	0	0	0	0	0	0	1	1		0	0	0	0	0	0	0	0	0	0	0
1	3	2009	1	0	0	0	0	0	0	0	0	0	0	0	0	1	1		0	0	0	0	0	0	0	0	0	0	0
1	3	2009	1	0	0	0	0	0	0	0	0	0	0	0	0	1	1		0	0	0	0	0	0	0	0	0	0	0
1	3	2009	1	0	0	0	0	0	0	0	0	0	0	0	0	1	1		0	0	0	0	0	0	0	0	0	0	0
1	3	2009	1	0	0	0	0	0	0	0	0	0	0	0	0	1	1		0	0	0	0	0	0	0	0	0	0	0
1	3	2009	1	0	0	0	0	0	0	0	0	0	0	0	0	1	1		0	0	0	0	0	0	0	0	0	0	0
1	3	2009	1	0	0	0	0	0	0	0	0	0	0	0	0	1	1		0	0	0	0	0	0	0	0	0	0	0
1	3	2009	1	0	0	0	0	0	0	0	0	0	0	0	0	1	1		0	0	0	0	0	0	0	0	0	0	0
1	3	2009	1	0	0	0	0	0	0	0	0	0	0	0	0	1	1		0	0	0	0	0	0	0	0	0	0	0
1	3	2009	1	0	0	0	0	0	0	0	0	0	0	0	0	1	1		0	0	0	0	0	0	0	0	0	0	0
1	3	2009	1	0	0	0	0	0	0	0	0	0	0	0	0	1	1		0	0	0	0	0	0	0	0	0	0	0
1	3	2009	1	0	0	0	0	0	0	0	0	0	0	0	0	1	1		0	0	0	0	0	0	0	0	0	0	0
1	3	2009	1	0	0	0	0	0	0	0	0	0	0	0	0	1	1		0	0	0	0	0	0	0	0	0	0	0
1	3	2009	1	0	0	0	0	0	0	0	0	0	0	0	0	1	1		0	0	0	0	0	0	0	0	0	0	0
1	3	2009	1	0	0	0	0	0	0	0	0	0	0	0	0	1	1		0	0	0	0	0	0	0	0	0	0	0
1	3	2009	1	0	0	0	0	0	0	0	0	0	0	0	0	1	1		0	0	0	0	0	0	0	0	0	0	0
1	3	2009	1	0	0	0	0	0	0	0	0	0	0	0	0	1	1		0	0	0	0	0	0	0	0	0	0	0
1	3	2009	1	0	0	0	0	0	0	0	0	0	0	0	0	1	1		0	0	0	0	0	0	0	0	0	0	0
1	3	2009	1	0	0	0	0	0	0	0	0	0	0	0	0	1	1		0	0	0	0	0	0	0	0	0	0	0
1	3	2009	1	0	0	0	0	0	0	0	0	0	0	0	0	1	1		0	0	0	0	0	0	0	0	0	0	0
1	3	2009	1	0	0	0	0	0	0	0	0	0	0	0	0	1	1		0	0	0	0	0	0	0	0	0	0	0
1	3	2009	1	0	0	0	0	0	0	0	0	0	0	0	0	1	1		0	0	0	0	0	0	0	0	0	0	0
1	3	2009	1	0	0	0	0	0	0	0	0	0	0	0	0	1	1		0	0	0	0	0	0	0	0	0	0	0
1	3	2009	1	0	0	0	0	0	0	0	0	0	0	0	0	1	1		0	0	0	0	0	0	0	0	0	0	0
1	3	2009	1	0	0	0	0	0	0	0	0	0	0	0	0	1	1		0	0	0	0	0	0	0	0	0	0	0
1	3	2009	1	0	0	0	0	0	0	0	0	0	0	0	0	1	1		0	0	0	0	0	0	0	0	0	0	0
1	3	2009	1	0	0	0	0	0	0	0	0	0	0	0	0	1	1		0	0	0	0	0	0	0	0	0	0	0
1	3	2009	1	0	0	0	0	0	0	0	0	0	0	0	0	1	1		0	0	0	0	0	0	0	0	0	0	0
1	3	2009	1	0	0	0	0	0	0	0	0	0	0	0	0	1	1		0	0	0	0	0	0	0	0	0	0	0
1	3	2009	1	0	0	0	0	0	0	0	0	0	0	0	0	1	1		0	0	0	0	0	0	0	0	0	0	0
1	3	2009	1	0	0	0	0	0	0	0	0	0	0	0	0	1	1		0	0	0	0	0	0	0	0	0	0	0
1	3	2009	1	0	0	0	0	0	0	0	0	0	0	0	0	1	1		0	0	0	0	0	0	0	0	0	0	0
1	3	2009	1	0	0	0	0	0	0	0	0	0	0	0	0	1	1		0	0	0	0	0	0	0	0	0	0	0
1	3	2009	1	0	0	0	0	0	0	0	0	0	0	0	0	1	1		0	0	0	0	0	0	0	0	0	0	0
1	3	2009	1	0	0	0	0	0	0	0	0	0	0	0	0	1	1		0	0	0	0	0	0	0	0	0	0	0
1	3	2009	1	0	0	0	0	0	0	0	0	0	0	0	0	1	1		0	0	0	0	0	0	0	0	0	0	0
1	3	2009	1	0	0	0	0	0	0	0	0	0	0	0	0	1	1		0	0	0	0	0	0	0	0	0	0	0
1	3	2009	1	0	0	0	0	0	0	0	0	0	0	0	0	1	1		0	0	0	0	0	0	0	0	0	0	0
1	3	2009	1	0	0	0	0	0	0	0	0	0	0	0	0	1	1		0	0	0	0	0	0	0	0	0	0	0
1	3	2009	1	0	0	0	0	0	0	0	0	0	0	0	0	1	1		0	0	0	0	0	0	0	0	0	0	0
1	3	2009	1	0	0	0	0	0	0	0	0	0	0	0	0	1	1		0	0	0	0	0	0	0	0	0	0	0
1	3	2009	1	0	0	0	0	0	0	0	0	0	0	0	0	1	1		0	0	0	0	0	0	0	0	0	0	0
1	3	2009	1	0	0	0	0	0	0	0	0	0	0	0	0	1	1		0	0	0	0	0	0	0	0	0	0	0
1	3	2009	1	0	0	0	0	0	0	0	0	0	0	0	0	1	1		0	0	0	0	0	0	0	0	0	0	0
1	3	2009	1	0	0	0	0	0	0	0	0	0	0	0	0	1	1		0	0	0	0	0	0	0	0	0	0	0
1	3	2009	1	0	0	0	0	0	0	0	0	0	0	0	0	1	1		0	0	0	0	0	0	0	0	0	0	0
1	3	2009	1	0	0	0	0	0	0	0	0	0	0	0	0	1	1		0	0	0	0	0	0	0	0	0	0	0
1	3	2009	1	0	0	0	0	0	0	0	0	0	0	0	0	1	1		0	0	0	0	0	0	0	0	0	0	0
1	3	2009	1	0	0	0	0	0	0	0	0	0	0	0	0	1	1		0	0	0	0	0	0	0	0	0	0	0
1	3	2009	1	0	0	0	0	0	0	0	0	0	0	0	0	1	1		0	0	0	0	0	0	0	0	0	0	0
1	3	2009	1	0	0	0	0	0	0	0	0	0	0	0	0	1	1		0	0	0	0	0	0	0	0	0	0	0
1	3	2009	1	0	0	0	0	0	0	0	0	0	0	0	0	1	1		0	0	0	0	0	0	0	0	0	0	0
1	3	2009	1	0	0	0	0	0	0	0	0	0	0	0	0	1	1		0	0	0	0	0	0	0	0	0	0	0
1	3	2009	1	0	0	0	0	0	0	0	0	0	0	0	0	1	1		0	0	0	0	0	0	0	0	0	0	0
1	3	2009	1	0	0	0	0	0	0	0	0	0	0	0	0	1	1		0	0	0	0	0	0	0	0	0	0	0
1	3	2009	1	0	0	0	0	0	0	0	0	0	0	0	0	1	1		0	0	0	0	0	0	0	0	0	0	0
1	3	2009	1	0	0	0	0	0	0	0	0	0	0	0	0	1	1		0	0	0	0	0	0	0	0	0	0	0
1	3	2009	1	0	0	0	0	0	0	0	0	0	0	0	0	1	1		0	0	0	0	0	0	0	0	0	0	0
1	3	2009	1	0	0	0	0	0	0	0	0	0	0	0	0	1	1		0	0	0	0	0	0	0	0	0	0	0
1	3	2009	1	0	0	0	0	0	0	0	0	0	0	0	0	1	1		0	0	0	0	0	0	0	0	0	0	0
1	3	2009	1	0	0	0	0	0	0	0	0	0	0	0	0	1	1		0	0	0	0	0	0	0	0	0	0	0
1	3	2009	1	0	0	0	0	0	0	0	0	0	0	0	0	1	1		0	0	0	0	0	0	0	0	0	0	0
1	3	2009	1	0	0	0	0	0	0	0	0	0	0	0	0	1	1		0	0	0	0	0	0	0	0	0	0	0
1	3	2009	1	0	0	0	0	0	0	0	0	0	0	0	0	1	1		0	0	0	0	0	0	0	0	0	0	0
1	3	2009	1	0	0	0	0	0	0	0	0	0	0	0	0	1	1		0	0	0	0	0	0	0	0	0	0	0
1	3	2009	1	0	0	0	0	0	0	0	0	0	0	0	0	1	1		0	0	0	0	0	0	0	0	0	0	0
1	3	2009	1	0	0	0	0	0	0	0	0	0	0	0	0	1	1		0	0	0	0	0	0	0	0	0	0	0
1	3	2009	1	0	0	0	0	0	0	0	0	0	0	0	0	1	1		0	0	0	0	0	0	0	0	0	0	0
1	3	2009	1	0	0	0	0	0	0	0	0	0	0	0	0	1	1		0	0	0	0	0	0	0	0	0	0	0
1	3	2009	1	0	0	0	0	0	0	0	0	0	0	0	0	1	1		0	0	0	0	0	0	0	0	0	0	0
1	3	2009	1	0	0	0	0	0	0	0	0	0	0	0	0	1	1		0	0	0	0	0	0	0	0	0	0	0
1	3	2009	1	0	0	0	0	0	0	0	0	0	0	0	0	1	1		0	0	0	0	0	0	0	0	0	0	0
1	3	2009	1	0	0	0	0	0	0	0	0	0	0	0	0	1	1		0	0	0	0	0	0	0	0	0	0	0
1	3	2009	1	0	0	0	0	0	0	0	0	0	0	0	0	1	1		0	0	0	0	0	0	0	0	0	0	0
1	3	2009	1	0	0	0	0	0	0	0	0	0	0	0	0	1	1		0	0	0	0	0	0	0	0	0	0	0
1	3	2009	1	0	0	0	0	0	0	0	0	0	0	0	0	1	1		0	0	0	0	0	0	0	0	0	0	0
1	3	2009	1	0	0	0	0	0	0	0	0	0	0	0	0	1	1		0	0	0	0	0	0	0	0	0	0	0
1	3	2009	1	0	0	0	0	0	0	0	0	0	0	0	0	1	1		0	0	0	0	0	0	0	0	0	0	0
1	3	2009	1	0	0	0	0	0	0	0	0	0	0	0	0	1	1		0	0	0	0	0	0	0	0	0	0	0
1	3	2009	1	0	0	0	0	0	0	0	0	0	0	0	0	1	1		0	0	0	0	0	0	0	0	0	0	0
1	3	2009	1	0	0	0	0	0	0	0	0	0	0	0	0	1	1		0	0	0	0	0	0	0	0	0	0	0
1	3	2009	1	0	0	0	0	0	0	0	0	0	0	0	0	1	1		0	0	0	0	0	0	0	0	0	0	0
1	3	2009	1	0	0	0	0	0	0	0	0	0	0	0	0	1	1		0	0	0	0	0	0	0	0	0	0	0
1	3	2009	1	0	0	0	0	0	0	0	0	0	0	0	0	1	1		0	0	0	0	0	0	0	0	0	0	0
1	3	2009	1	0	0	0	0	0	0	0	0	0	0	0	0	1	1		0	0	0	0	0	0	0	0	0	0	0
1	3	2009	1	0	0	0	0	0	0	0	0	0	0	0	0	1	1		0	0	0	0	0	0	0	0	0	0	0
1	3	2009	1	0	0	0	0	0	0	0	0	0	0	0	0	1	1		0	0	0	0	0	0	0	0	0	0	0
1	3	2009	1	0	0	0	0	0	0	0	0	0	0	0	0	1	1		0	0	0	0	0	0	0	0	0	0	0
1	3	2009	1	0	0	0	0	0	0	0	0	0	0	0	0	2	1		0	0	0	0	0	0	0	0	0	0	0
1	3	2009	1	0	0	0	0	0	0	0	0	0	0	0	0	2	1		0	0	0	0	0	0	0	0	0	0	0
1	3	2009	1	0	0	0	0	0	0	0	0	0	0	0	0	2	1		0	0	0	0	0	0	0	0	0	0	0
1	3	2009	1	0	0	0	0	0	0	0	0	0	0	0	0	2	1		0	0	0	0	0	0	0	0	0	0	0
1	3	2009	1	0	0	0	0	0	0	0	0	0	0	0	0	2	1		0	0	0	0	0	0	0	0	0	0	0
1	3	2009	1	0	0	0	0	0	0	0	0	0	0	0	0	2	1		0	0	0	0	0	0	0	0	0	0	0
1	3	2009	1	0	0	0	0	0	0	0	0	0	0	0	0	2	1		0	0	0	0	0	0	0	0	0	0	0
1	3	2009	1	0	0	0	0	0	0	0	0	0	0	0	0	2	1		0	0	0	0	0	0	0	0	0	0	0
1	3	2009	1	0	0	0	0	0	0	0	0	0	0	0	0	2	1		0	0	0	0	0	0	0	0	0	0	0
1	3	2009	1	0	0	0	0	0	0	0	0	0	0	0	0	2	1		0	0	0	0	0	0	0	0	0	0	0
1	3	2009	1	0	0	0	0	0	0	0	0	0	0	0	0	2	1		0	0	0	0	0	0	0	0	0	0	0
1	3	2009	1	0	0	0	0	0	0	0	0	0	0	0	0	2	1		0	0	0	0	0	0	0	0	0	0	0
1	3	2009	1	0	0	0	0	0	0	0	0	0	0	0	0	2	1		0	0	0	0	0	0	0	0	0	0	0
1	3	2009	1	0	0	0	0	0	0	0	0	0	0	0	0	2	1		0	0	0	0	0	0	0	0	0	0	0
1	3	2009	1	0	0	0	0	0	0	0	0	0	0	0	0	2	1		0	0	0	0	0	0	0	0	0	0	0
1	3	2009	1	0	0	0	0	0	0	0	0	0	0	0	0	2	1		0	0	0	0	0	0	0	0	0	0	0
1	3	2009	1	0	0	0	0	0	0	0	0	0	0	0	0	2	1		0	0	0	0	0	0	0	0	0	0	0
1	3	2009	1	0	0	0	0	0	0	0	0	0	0	0	0	2	1		0	0	0	0	0	0	0	0	0	0	0
1	3	2009	1	0	0	0	0	0	0	0	0	0	0	0	0	2	1		0	0	0	0	0	0	0	0	0	0	0
1	3	2009	1	0	0	0	0	0	0	0	0	0	0	0	0	2	1		0	0	0	0	0	0	0	0	0	0	0
1	3	2009	1	0	0	0	0	0	0	0	0	0	0	0	0	2	1		0	0	0	0	0	0	0	0	0	0	0
1	3	2009	1	0	0	0	0	0	0	0	0	0	0	0	0	2	1		0	0	0	0	0	0	0	0	0	0	0
1	3	2009	1	0	0	0	0	0	0	0	0	0	0	0	0	2	1		0	0	0	0	0	0	0	0	0	0	0
1	3	2009	1	0	0	0	0	0	0	0	0	0	0	0	0	2	1		0	0	0	0	0	0	0	0	0	0	0
1	3	2009	1	0	0	0	0	0	0	0	0	0	0	0	0	2	1		0	0	0	0	0	0	0	0	0	0	0
1	3	2009	1	0	0	0	0	0	0	0	0	0	0	0	0	2	1		0	0	0	0	0	0	0	0	0	0	0
1	3	2009	1	0	0	0	0	0	0	0	0	0	0	0	0	2	1		0	0	0	0	0	0	0	0	0	0	0
1	3	2009	1	0	0	0	0	0	0	0	0	0	0	0	0	2	1		0	0	0	0	0	0	0	0	0	0	0
1	3	2009	1	0	0	0	0	0	0	0	0	0	0	0	0	2	1		0	0	0	0	0	0	0	0	0	0	0
1	3	2009	1	0	0	0	0	0	0	0	0	0	0	0	0	2	1		0	0	0	0	0	0	0	0	0	0	0
1	3	2009	1	0	0	0	0	0	0	0	0	0	0	0	0	2	1		0	0	0	0	0	0	0	0	0	0	0
1	3	2009	1	0	0	0	0	0	0	0	0	0	0	0	0	2	1		0	0	0	0	0	0	0	0	0	0	0
1	3	2009	1	0	0	0	0	0	0	0	0	0	0	0	0	2	1		0	0	0	0	0	0	0	0	0	0	0
1	3	2009	1	0	0	0	0	0	0	0	0	0	0	0	0	2	1		0	0	0	0	0	0	0	0	0	0	0
1	3	2009	1	0	0	0	0	0	0	0	0	0	0	0	0	2	1		0	0	0	0	0	0	0	0	0	0	0
1	3	2009	1	0	0	0	0	0	0	0	0	0	0	0	0	2	1		0	0	0	0	0	0	0	0	0	0	0
1	3	2009	1	0	0	0	0	0	0	0	0	0	0	0	0	2	1		0	0	0	0	0	0	0	0	0	0	0
1	3	2009	1	0	0	0	0	0	0	0	0	0	0	0	0	2	1		0	0	0	0	0	0	0	0	0	0	0
1	3	2009	1	0	0	0	0	0	0	0	0	0	0	0	0	2	1		0	0	0	0	0	0	0	0	0	0	0
1	3	2009	1	0	0	0	0	0	0	0	0	0	0	0	0	2	1		0	0	0	0	0	0	0	0	0	0	0
1	3	2009	1	0	0	0	0	0	0	0	0	0	0	0	0	2	1		0	0	0	0	0	0	0	0	0	0	0
1	3	2009	1	0	0	0	0	0	0	0	0	0	0	0	0	2	1		0	0	0	0	0	0	0	0	0	0	0
1	3	2009	1	0	0	0	0	0	0	0	0	0	0	0	0	2	1		0	0	0	0	0	0	0	0	0	0	0
1	3	2009	1	0	0	0	0	0	0	0	0	0	0	0	0	2	1		0	0	0	0	0	0	0	0	0	0	0
1	3	2009	1	0	0	0	0	0	0	0	0	0	0	0	0	2	1		0	0	0	0	0	0	0	0	0	0	0
1	3	2009	1	0	0	0	0	0	0	0	0	0	0	0	0	2	1		0	0	0	0	0	0	0	0	0	0	0
1	3	2009	1	0	0	0	0	0	0	0	0	0	0	0	0	2	1		0	0	0	0	0	0	0	0	0	0	0
1	3	2009	1	0	0	0	0	0	0	0	0	0	0	0	0	2	1		0	0	0	0	0	0	0	0	0	0	0
1	3	2009	1	0	0	0	0	0	0	0	0	0	0	0	0	2	1		0	0	0	0	0	0	0	0	0	0	0
1	3	2009	1	0	0	0	0	0	0	0	0	0	0	0	0	2	1		0	0	0	0	0	0	0	0	0	0	0
1	3	2009	1	0	0	0	0	0	0	0	0	0	0	0	0	2	1		0	0	0	0	0	0	0	0	0	0	0
1	3	2009	1	0	0	0	0	0	0	0	0	0	0	0	0	2	1		0	0	0	0	0	0	0	0	0	0	0
1	3	2009	1	0	0	0	0	0	0	0	0	0	0	0	0	2	1		0	0	0	0	0	0	0	0	0	0	0

## Sheet: AF-JUV-single
code	month	year	specie	A FL	A FF	A WS	A BG	A FT	A EA	A AT	A AM	A GS	A GSP	A all/M	SR count	sex	stage		PRESENCE	P FL	P FF	P WS	P BG	P FT	P EA	P AT	P AM	P GS	P GSP	INTENSITY	I FL	I FF	I WS	I BG	I FT	I EA	I AT	I AM	I GS	I GSP
1	JANUARY	2009	1	0	2	0	0	0	0	0	0	0	0	2	1	1	2		1	0	1	0	0	0	0	0	0	0	0	2		2
1	JANUARY	2009	1	0	1	0	0	0	0	0	0	0	0	1	1	1	2		1	0	1	0	0	0	0	0	0	0	0	1		1
1	JANUARY	2009	1	0	0	0	0	0	1	0	0	0	0	1	1	1	2		1	0	0	0	0	0	1	0	0	0	0	1						1
1	JANUARY	2009	1	1	0	0	0	0	0	0	0	0	0	1	1	2	2		1	1	0	0	0	0	0	0	0	0	0	1	1
1	JANUARY	2009	1	0	0	0	0	0	1	0	0	0	0	1	1	2	2		1	0	0	0	0	0	1	0	0	0	0	1						1
1	JANUARY	2009	1	0	0	0	0	0	1	0	0	0	0	1	1	1	2		1	0	0	0	0	0	1	0	0	0	0	1						1
1	JANUARY	2009	1	0	0	0	0	0	0	0	0	1	0	1	1	1	2		1	0	0	0	0	0	0	0	0	1	0	1									1
1	JANUARY	2009	1	0	1	0	0	0	0	0	0	0	0	1	1	1	2		1	0	1	0	0	0	0	0	0	0	0	1		1
1	JANUARY	2009	1	0	0	0	0	0	0	0	0	0	1	1	1	2	2		1	0	0	0	0	0	0	0	0	0	1	1										1
1	JANUARY	2009	1	1	0	0	0	0	0	0	0	0	0	1	1	2	2		1	1	0	0	0	0	0	0	0	0	0	1	1
1	JANUARY	2009	1	0	0	0	0	0	0	0	0	0	0	0	0	1	2		0	0	0	0	0	0	0	0	0	0	0
1	JANUARY	2009	1	0	0	0	0	0	0	0	0	0	0	0	0	1	2		0	0	0	0	0	0	0	0	0	0	0
1	JANUARY	2009	1	0	0	0	0	0	0	0	0	0	0	0	0	1	2		0	0	0	0	0	0	0	0	0	0	0
1	JANUARY	2009	1	0	0	0	0	0	0	0	0	0	0	0	0	1	2		0	0	0	0	0	0	0	0	0	0	0
1	JANUARY	2009	1	0	0	0	0	0	0	0	0	0	0	0	0	1	2		0	0	0	0	0	0	0	0	0	0	0
1	JANUARY	2009	1	0	0	0	0	0	0	0	0	0	0	0	0	1	2		0	0	0	0	0	0	0	0	0	0	0
1	JANUARY	2009	1	0	0	0	0	0	0	0	0	0	0	0	0	1	2		0	0	0	0	0	0	0	0	0	0	0
1	JANUARY	2009	1	0	0	0	0	0	0	0	0	0	0	0	0	1	2		0	0	0	0	0	0	0	0	0	0	0
1	JANUARY	2009	1	0	0	0	0	0	0	0	0	0	0	0	0	1	2		0	0	0	0	0	0	0	0	0	0	0
1	JANUARY	2009	1	0	0	0	0	0	0	0	0	0	0	0	0	1	2		0	0	0	0	0	0	0	0	0	0	0
1	JANUARY	2009	1	0	0	0	0	0	0	0	0	0	0	0	0	1	2		0	0	0	0	0	0	0	0	0	0	0
1	JANUARY	2009	1	0	0	0	0	0	0	0	0	0	0	0	0	1	2		0	0	0	0	0	0	0	0	0	0	0
1	JANUARY	2009	1	0	0	0	0	0	0	0	0	0	0	0	0	1	2		0	0	0	0	0	0	0	0	0	0	0
1	JANUARY	2009	1	0	0	0	0	0	0	0	0	0	0	0	0	1	2		0	0	0	0	0	0	0	0	0	0	0
1	JANUARY	2009	1	0	0	0	0	0	0	0	0	0	0	0	0	1	2		0	0	0	0	0	0	0	0	0	0	0
1	JANUARY	2009	1	0	0	0	0	0	0	0	0	0	0	0	0	1	2		0	0	0	0	0	0	0	0	0	0	0
1	JANUARY	2009	1	0	0	0	0	0	0	0	0	0	0	0	0	1	2		0	0	0	0	0	0	0	0	0	0	0
1	JANUARY	2009	1	0	0	0	0	0	0	0	0	0	0	0	0	1	2		0	0	0	0	0	0	0	0	0	0	0
1	JANUARY	2009	1	0	0	0	0	0	0	0	0	0	0	0	0	1	2		0	0	0	0	0	0	0	0	0	0	0
1	JANUARY	2009	1	0	0	0	0	0	0	0	0	0	0	0	0	1	2		0	0	0	0	0	0	0	0	0	0	0
1	JANUARY	2009	1	0	0	0	0	0	0	0	0	0	0	0	0	1	2		0	0	0	0	0	0	0	0	0	0	0
1	JANUARY	2009	1	0	0	0	0	0	0	0	0	0	0	0	0	1	2		0	0	0	0	0	0	0	0	0	0	0
1	JANUARY	2009	1	0	0	0	0	0	0	0	0	0	0	0	0	1	2		0	0	0	0	0	0	0	0	0	0	0
1	JANUARY	2009	1	0	0	0	0	0	0	0	0	0	0	0	0	1	2		0	0	0	0	0	0	0	0	0	0	0
1	JANUARY	2009	1	0	0	0	0	0	0	0	0	0	0	0	0	1	2		0	0	0	0	0	0	0	0	0	0	0
1	JANUARY	2009	1	0	0	0	0	0	0	0	0	0	0	0	0	1	2		0	0	0	0	0	0	0	0	0	0	0
1	JANUARY	2009	1	0	0	0	0	0	0	0	0	0	0	0	0	1	2		0	0	0	0	0	0	0	0	0	0	0
1	JANUARY	2009	1	0	0	0	0	0	0	0	0	0	0	0	0	1	2		0	0	0	0	0	0	0	0	0	0	0
1	JANUARY	2009	1	0	0	0	0	0	0	0	0	0	0	0	0	1	2		0	0	0	0	0	0	0	0	0	0	0
1	JANUARY	2009	1	0	0	0	0	0	0	0	0	0	0	0	0	1	2		0	0	0	0	0	0	0	0	0	0	0
1	JANUARY	2009	1	0	0	0	0	0	0	0	0	0	0	0	0	1	2		0	0	0	0	0	0	0	0	0	0	0
1	JANUARY	2009	1	0	0	0	0	0	0	0	0	0	0	0	0	1	2		0	0	0	0	0	0	0	0	0	0	0
1	JANUARY	2009	1	0	0	0	0	0	0	0	0	0	0	0	0	1	2		0	0	0	0	0	0	0	0	0	0	0
1	JANUARY	2009	1	0	0	0	0	0	0	0	0	0	0	0	0	1	2		0	0	0	0	0	0	0	0	0	0	0
1	JANUARY	2009	1	0	0	0	0	0	0	0	0	0	0	0	0	1	2		0	0	0	0	0	0	0	0	0	0	0
1	JANUARY	2009	1	0	0	0	0	0	0	0	0	0	0	0	0	1	2		0	0	0	0	0	0	0	0	0	0	0
1	JANUARY	2009	1	0	0	0	0	0	0	0	0	0	0	0	0	1	2		0	0	0	0	0	0	0	0	0	0	0
1	JANUARY	2009	1	0	0	0	0	0	0	0	0	0	0	0	0	1	2		0	0	0	0	0	0	0	0	0	0	0
1	JANUARY	2009	1	0	0	0	0	0	0	0	0	0	0	0	0	1	2		0	0	0	0	0	0	0	0	0	0	0
1	JANUARY	2009	1	0	0	0	0	0	0	0	0	0	0	0	0	1	2		0	0	0	0	0	0	0	0	0	0	0
1	JANUARY	2009	1	0	0	0	0	0	0	0	0	0	0	0	0	1	2		0	0	0	0	0	0	0	0	0	0	0
1	JANUARY	2009	1	0	0	0	0	0	0	0	0	0	0	0	0	1	2		0	0	0	0	0	0	0	0	0	0	0
1	JANUARY	2009	1	0	0	0	0	0	0	0	0	0	0	0	0	1	2		0	0	0	0	0	0	0	0	0	0	0
1	JANUARY	2009	1	0	0	0	0	0	0	0	0	0	0	0	0	1	2		0	0	0	0	0	0	0	0	0	0	0
1	JANUARY	2009	1	0	0	0	0	0	0	0	0	0	0	0	0	1	2		0	0	0	0	0	0	0	0	0	0	0
1	JANUARY	2009	1	0	0	0	0	0	0	0	0	0	0	0	0	1	2		0	0	0	0	0	0	0	0	0	0	0
1	JANUARY	2009	1	0	0	0	0	0	0	0	0	0	0	0	0	1	2		0	0	0	0	0	0	0	0	0	0	0
1	JANUARY	2009	1	0	0	0	0	0	0	0	0	0	0	0	0	1	2		0	0	0	0	0	0	0	0	0	0	0
1	JANUARY	2009	1	0	0	0	0	0	0	0	0	0	0	0	0	1	2		0	0	0	0	0	0	0	0	0	0	0
1	JANUARY	2009	1	0	0	0	0	0	0	0	0	0	0	0	0	1	2		0	0	0	0	0	0	0	0	0	0	0
1	JANUARY	2009	1	0	0	0	0	0	0	0	0	0	0	0	0	1	2		0	0	0	0	0	0	0	0	0	0	0
1	JANUARY	2009	1	0	0	0	0	0	0	0	0	0	0	0	0	1	2		0	0	0	0	0	0	0	0	0	0	0
1	JANUARY	2009	1	0	0	0	0	0	0	0	0	0	0	0	0	1	2		0	0	0	0	0	0	0	0	0	0	0
1	JANUARY	2009	1	0	0	0	0	0	0	0	0	0	0	0	0	1	2		0	0	0	0	0	0	0	0	0	0	0
1	JANUARY	2009	1	0	0	0	0	0	0	0	0	0	0	0	0	1	2		0	0	0	0	0	0	0	0	0	0	0
1	JANUARY	2009	1	0	0	0	0	0	0	0	0	0	0	0	0	1	2		0	0	0	0	0	0	0	0	0	0	0
1	JANUARY	2009	1	0	0	0	0	0	0	0	0	0	0	0	0	1	2		0	0	0	0	0	0	0	0	0	0	0
1	JANUARY	2009	1	0	0	0	0	0	0	0	0	0	0	0	0	1	2		0	0	0	0	0	0	0	0	0	0	0
1	JANUARY	2009	1	0	0	0	0	0	0	0	0	0	0	0	0	1	2		0	0	0	0	0	0	0	0	0	0	0
1	JANUARY	2009	1	0	0	0	0	0	0	0	0	0	0	0	0	1	2		0	0	0	0	0	0	0	0	0	0	0
1	JANUARY	2009	1	0	0	0	0	0	0	0	0	0	0	0	0	1	2		0	0	0	0	0	0	0	0	0	0	0
1	JANUARY	2009	1	0	0	0	0	0	0	0	0	0	0	0	0	1	2		0	0	0	0	0	0	0	0	0	0	0
1	JANUARY	2009	1	0	0	0	0	0	0	0	0	0	0	0	0	1	2		0	0	0	0	0	0	0	0	0	0	0
1	JANUARY	2009	1	0	0	0	0	0	0	0	0	0	0	0	0	1	2		0	0	0	0	0	0	0	0	0	0	0
1	JANUARY	2009	1	0	0	0	0	0	0	0	0	0	0	0	0	1	2		0	0	0	0	0	0	0	0	0	0	0
1	JANUARY	2009	1	0	0	0	0	0	0	0	0	0	0	0	0	1	2		0	0	0	0	0	0	0	0	0	0	0
1	JANUARY	2009	1	0	0	0	0	0	0	0	0	0	0	0	0	1	2		0	0	0	0	0	0	0	0	0	0	0
1	JANUARY	2009	1	0	0	0	0	0	0	0	0	0	0	0	0	1	2		0	0	0	0	0	0	0	0	0	0	0
1	JANUARY	2009	1	0	0	0	0	0	0	0	0	0	0	0	0	2	2		0	0	0	0	0	0	0	0	0	0	0
1	JANUARY	2009	1	0	0	0	0	0	0	0	0	0	0	0	0	2	2		0	0	0	0	0	0	0	0	0	0	0
1	JANUARY	2009	1	0	0	0	0	0	0	0	0	0	0	0	0	2	2		0	0	0	0	0	0	0	0	0	0	0
1	JANUARY	2009	1	0	0	0	0	0	0	0	0	0	0	0	0	2	2		0	0	0	0	0	0	0	0	0	0	0
1	JANUARY	2009	1	0	0	0	0	0	0	0	0	0	0	0	0	2	2		0	0	0	0	0	0	0	0	0	0	0
1	JANUARY	2009	1	0	0	0	0	0	0	0	0	0	0	0	0	2	2		0	0	0	0	0	0	0	0	0	0	0
1	JANUARY	2009	1	0	0	0	0	0	0	0	0	0	0	0	0	2	2		0	0	0	0	0	0	0	0	0	0	0
1	JANUARY	2009	1	0	0	0	0	0	0	0	0	0	0	0	0	2	2		0	0	0	0	0	0	0	0	0	0	0
1	JANUARY	2009	1	0	0	0	0	0	0	0	0	0	0	0	0	2	2		0	0	0	0	0	0	0	0	0	0	0
1	JANUARY	2009	1	0	0	0	0	0	0	0	0	0	0	0	0	2	2		0	0	0	0	0	0	0	0	0	0	0
1	JANUARY	2009	1	0	0	0	0	0	0	0	0	0	0	0	0	2	2		0	0	0	0	0	0	0	0	0	0	0
1	JANUARY	2009	1	0	0	0	0	0	0	0	0	0	0	0	0	2	2		0	0	0	0	0	0	0	0	0	0	0
1	JANUARY	2009	1	0	0	0	0	0	0	0	0	0	0	0	0	2	2		0	0	0	0	0	0	0	0	0	0	0
1	JANUARY	2009	1	0	0	0	0	0	0	0	0	0	0	0	0	2	2		0	0	0	0	0	0	0	0	0	0	0
1	JANUARY	2009	1	0	0	0	0	0	0	0	0	0	0	0	0	2	2		0	0	0	0	0	0	0	0	0	0	0
1	JANUARY	2009	1	0	0	0	0	0	0	0	0	0	0	0	0	2	2		0	0	0	0	0	0	0	0	0	0	0
1	JANUARY	2009	1	0	0	0	0	0	0	0	0	0	0	0	0	2	2		0	0	0	0	0	0	0	0	0	0	0
1	JANUARY	2009	1	0	0	0	0	0	0	0	0	0	0	0	0	2	2		0	0	0	0	0	0	0	0	0	0	0
1	JANUARY	2009	1	0	0	0	0	0	0	0	0	0	0	0	0	2	2		0	0	0	0	0	0	0	0	0	0	0
1	JANUARY	2009	1	0	0	0	0	0	0	0	0	0	0	0	0	2	2		0	0	0	0	0	0	0	0	0	0	0
1	JANUARY	2009	1	0	0	0	0	0	0	0	0	0	0	0	0	2	2		0	0	0	0	0	0	0	0	0	0	0
1	JANUARY	2009	1	0	0	0	0	0	0	0	0	0	0	0	0	2	2		0	0	0	0	0	0	0	0	0	0	0
1	JANUARY	2009	1	0	0	0	0	0	0	0	0	0	0	0	0	2	2		0	0	0	0	0	0	0	0	0	0	0
1	JANUARY	2009	1	0	0	0	0	0	0	0	0	0	0	0	0	2	2		0	0	0	0	0	0	0	0	0	0	0
1	JANUARY	2009	1	0	0	0	0	0	0	0	0	0	0	0	0	2	2		0	0	0	0	0	0	0	0	0	0	0
1	JANUARY	2009	1	0	0	0	0	0	0	0	0	0	0	0	0	2	2		0	0	0	0	0	0	0	0	0	0	0
1	JANUARY	2009	1	0	0	0	0	0	0	0	0	0	0	0	0	2	2		0	0	0	0	0	0	0	0	0	0	0
1	JANUARY	2009	1	0	0	0	0	0	0	0	0	0	0	0	0	2	2		0	0	0	0	0	0	0	0	0	0	0
1	JANUARY	2009	1	0	0	0	0	0	0	0	0	0	0	0	0	2	2		0	0	0	0	0	0	0	0	0	0	0
1	JANUARY	2009	1	0	0	0	0	0	0	0	0	0	0	0	0	2	2		0	0	0	0	0	0	0	0	0	0	0
1	JANUARY	2009	1	0	0	0	0	0	0	0	0	0	0	0	0	2	2		0	0	0	0	0	0	0	0	0	0	0
1	JANUARY	2009	1	0	0	0	0	0	0	0	0	0	0	0	0	2	2		0	0	0	0	0	0	0	0	0	0	0
1	JANUARY	2009	1	0	0	0	0	0	0	0	0	0	0	0	0	2	2		0	0	0	0	0	0	0	0	0	0	0
1	JANUARY	2009	1	0	0	0	0	0	0	0	0	0	0	0	0	2	2		0	0	0	0	0	0	0	0	0	0	0
1	JANUARY	2009	1	0	0	0	0	0	0	0	0	0	0	0	0	2	2		0	0	0	0	0	0	0	0	0	0	0
1	JANUARY	2009	1	0	0	0	0	0	0	0	0	0	0	0	0	2	2		0	0	0	0	0	0	0	0	0	0	0
1	JANUARY	2009	1	0	0	0	0	0	0	0	0	0	0	0	0	2	2		0	0	0	0	0	0	0	0	0	0	0
1	JANUARY	2009	1	0	0	0	0	0	0	0	0	0	0	0	0	2	2		0	0	0	0	0	0	0	0	0	0	0
1	JANUARY	2009	1	0	0	0	0	0	0	0	0	0	0	0	0	2	2		0	0	0	0	0	0	0	0	0	0	0
1	JANUARY	2009	1	0	0	0	0	0	0	0	0	0	0	0	0	2	2		0	0	0	0	0	0	0	0	0	0	0
1	JANUARY	2009	1	0	0	0	0	0	0	0	0	0	0	0	0	2	2		0	0	0	0	0	0	0	0	0	0	0
1	JANUARY	2009	1	0	0	0	0	0	0	0	0	0	0	0	0	2	2		0	0	0	0	0	0	0	0	0	0	0
1	JANUARY	2009	1	0	0	0	0	0	0	0	0	0	0	0	0	2	2		0	0	0	0	0	0	0	0	0	0	0
1	JANUARY	2009	1	0	0	0	0	0	0	0	0	0	0	0	0	2	2		0	0	0	0	0	0	0	0	0	0	0
1	JANUARY	2009	1	0	0	0	0	0	0	0	0	0	0	0	0	2	2		0	0	0	0	0	0	0	0	0	0	0
1	JANUARY	2009	1	0	0	0	0	0	0	0	0	0	0	0	0	2	2		0	0	0	0	0	0	0	0	0	0	0
1	JANUARY	2009	1	0	0	0	0	0	0	0	0	0	0	0	0	2	2		0	0	0	0	0	0	0	0	0	0	0
1	JANUARY	2009	1	0	0	0	0	0	0	0	0	0	0	0	0	2	2		0	0	0	0	0	0	0	0	0	0	0
1	JANUARY	2009	1	0	0	0	0	0	0	0	0	0	0	0	0	2	2		0	0	0	0	0	0	0	0	0	0	0
1	JANUARY	2009	1	0	0	0	0	0	0	0	0	0	0	0	0	2	2		0	0	0	0	0	0	0	0	0	0	0
1	JANUARY	2009	1	0	0	0	0	0	0	0	0	0	0	0	0	2	2		0	0	0	0	0	0	0	0	0	0	0
1	JANUARY	2009	1	0	0	0	0	0	0	0	0	0	0	0	0	2	2		0	0	0	0	0	0	0	0	0	0	0
1	JANUARY	2009	1	0	0	0	0	0	0	0	0	0	0	0	0	2	2		0	0	0	0	0	0	0	0	0	0	0
1	JANUARY	2009	1	0	0	0	0	0	0	0	0	0	0	0	0	2	2		0	0	0	0	0	0	0	0	0	0	0
1	JANUARY	2009	1	0	0	0	0	0	0	0	0	0	0	0	0	2	2		0	0	0	0	0	0	0	0	0	0	0
1	JANUARY	2009	1	0	0	0	0	0	0	0	0	0	0	0	0	2	2		0	0	0	0	0	0	0	0	0	0	0
1	JANUARY	2009	1	0	0	0	0	0	0	0	0	0	0	0	0	2	2		0	0	0	0	0	0	0	0	0	0	0
1	JANUARY	2009	1	0	0	0	0	0	0	0	0	0	0	0	0	2	2		0	0	0	0	0	0	0	0	0	0	0
1	JANUARY	2009	1	0	0	0	0	0	0	0	0	0	0	0	0	2	2		0	0	0	0	0	0	0	0	0	0	0
1	JANUARY	2009	1	0	0	0	0	0	0	0	0	0	0	0	0	2	2		0	0	0	0	0	0	0	0	0	0	0
1	JANUARY	2009	1	0	0	0	0	0	0	0	0	0	0	0	0	2	2		0	0	0	0	0	0	0	0	0	0	0
1	JANUARY	2009	1	0	0	0	0	0	0	0	0	0	0	0	0	2	2		0	0	0	0	0	0	0	0	0	0	0
1	JANUARY	2009	1	0	0	0	0	0	0	0	0	0	0	0	0	2	2		0	0	0	0	0	0	0	0	0	0	0
1	JANUARY	2009	1	0	0	0	0	0	0	0	0	0	0	0	0	2	2		0	0	0	0	0	0	0	0	0	0	0
1	JANUARY	2009	1	0	0	0	0	0	0	0	0	0	0	0	0	2	2		0	0	0	0	0	0	0	0	0	0	0
1	JANUARY	2009	1	0	0	0	0	0	0	0	0	0	0	0	0	2	2		0	0	0	0	0	0	0	0	0	0	0
1	JANUARY	2009	1	0	0	0	0	0	0	0	0	0	0	0	0	2	2		0	0	0	0	0	0	0	0	0	0	0
1	JANUARY	2009	1	0	0	0	0	0	0	0	0	0	0	0	0	2	2		0	0	0	0	0	0	0	0	0	0	0
1	JANUARY	2009	1	0	0	0	0	0	0	0	0	0	0	0	0	2	2		0	0	0	0	0	0	0	0	0	0	0
1	JANUARY	2009	1	0	0	0	0	0	0	0	0	0	0	0	0	2	2		0	0	0	0	0	0	0	0	0	0	0
1	JANUARY	2009	1	0	0	0	0	0	0	0	0	0	0	0	0	2	2		0	0	0	0	0	0	0	0	0	0	0
1	JANUARY	2009	1	0	0	0	0	0	0	0	0	0	0	0	0	2	2		0	0	0	0	0	0	0	0	0	0	0
1	JANUARY	2009	1	0	0	0	0	0	0	0	0	0	0	0	0	2	2		0	0	0	0	0	0	0	0	0	0	0
1	JANUARY	2009	1	0	0	0	0	0	0	0	0	0	0	0	0	2	2		0	0	0	0	0	0	0	0	0	0	0
1	JANUARY	2009	1	0	0	0	0	0	0	0	0	0	0	0	0	2	2		0	0	0	0	0	0	0	0	0	0	0
1	JANUARY	2009	1	0	0	0	0	0	0	0	0	0	0	0	0	2	2		0	0	0	0	0	0	0	0	0	0	0
1	JANUARY	2009	1	0	0	0	0	0	0	0	0	0	0	0	0	2	2		0	0	0	0	0	0	0	0	0	0	0
1	JANUARY	2009	1	0	0	0	0	0	0	0	0	0	0	0	0	2	2		0	0	0	0	0	0	0	0	0	0	0
1	JANUARY	2009	1	0	0	0	0	0	0	0	0	0	0	0	0	2	2		0	0	0	0	0	0	0	0	0	0	0
1	JANUARY	2009	1	0	0	0	0	0	0	0	0	0	0	0	0	2	2		0	0	0	0	0	0	0	0	0	0	0
1	JANUARY	2009	1	0	0	0	0	0	0	0	0	0	0	0	0	2	2		0	0	0	0	0	0	0	0	0	0	0
1	JANUARY	2009	1	0	0	0	0	0	0	0	0	0	0	0	0	2	2		0	0	0	0	0	0	0	0	0	0	0
1	JANUARY	2009	1	0	0	0	0	0	0	0	0	0	0	0	0	2	2		0	0	0	0	0	0	0	0	0	0	0
1	JANUARY	2009	1	0	0	0	0	0	0	0	0	0	0	0	0	2	2		0	0	0	0	0	0	0	0	0	0	0
1	JANUARY	2009	1	0	0	0	0	0	0	0	0	0	0	0	0	2	2		0	0	0	0	0	0	0	0	0	0	0
1	JANUARY	2009	1	0	0	0	0	0	0	0	0	0	0	0	0	2	2		0	0	0	0	0	0	0	0	0	0	0
1	JANUARY	2009	1	0	0	0	0	0	0	0	0	0	0	0	0	2	2		0	0	0	0	0	0	0	0	0	0	0
1	JANUARY	2009	1	0	0	0	0	0	0	0	0	0	0	0	0	2	2		0	0	0	0	0	0	0	0	0	0	0
1	JANUARY	2009	1	0	0	0	0	0	0	0	0	0	0	0	0	2	2		0	0	0	0	0	0	0	0	0	0	0
1	JANUARY	2009	1	0	0	0	0	0	0	0	0	0	0	0	0	2	2		0	0	0	0	0	0	0	0	0	0	0
1	FEBRUARY	2009	1	0	1	0	0	0	0	0	0	0	0	1	1	2	2		1	0	1	0	0	0	0	0	0	0	0	1		1
1	FEBRUARY	2009	1	0	0	0	0	0	0	0	0	0	0	0	0	1	2		0	0	0	0	0	0	0	0	0	0	0
1	FEBRUARY	2009	1	0	0	0	0	0	0	0	0	0	0	0	0	1	2		0	0	0	0	0	0	0	0	0	0	0
1	FEBRUARY	2009	1	0	0	0	0	0	0	0	0	0	0	0	0	1	2		0	0	0	0	0	0	0	0	0	0	0
1	FEBRUARY	2009	1	0	0	0	0	0	0	0	0	0	0	0	0	1	2		0	0	0	0	0	0	0	0	0	0	0
1	FEBRUARY	2009	1	0	0	0	0	0	0	0	0	0	0	0	0	1	2		0	0	0	0	0	0	0	0	0	0	0
1	FEBRUARY	2009	1	0	0	0	0	0	0	0	0	0	0	0	0	1	2		0	0	0	0	0	0	0	0	0	0	0
1	FEBRUARY	2009	1	0	0	0	0	0	0	0	0	0	0	0	0	1	2		0	0	0	0	0	0	0	0	0	0	0
1	FEBRUARY	2009	1	0	0	0	0	0	0	0	0	0	0	0	0	1	2		0	0	0	0	0	0	0	0	0	0	0
1	FEBRUARY	2009	1	0	0	0	0	0	0	0	0	0	0	0	0	1	2		0	0	0	0	0	0	0	0	0	0	0
1	FEBRUARY	2009	1	0	0	0	0	0	0	0	0	0	0	0	0	1	2		0	0	0	0	0	0	0	0	0	0	0
1	FEBRUARY	2009	1	0	0	0	0	0	0	0	0	0	0	0	0	1	2		0	0	0	0	0	0	0	0	0	0	0
1	FEBRUARY	2009	1	0	0	0	0	0	0	0	0	0	0	0	0	1	2		0	0	0	0	0	0	0	0	0	0	0
1	FEBRUARY	2009	1	0	0	0	0	0	0	0	0	0	0	0	0	1	2		0	0	0	0	0	0	0	0	0	0	0
1	FEBRUARY	2009	1	0	0	0	0	0	0	0	0	0	0	0	0	1	2		0	0	0	0	0	0	0	0	0	0	0
1	FEBRUARY	2009	1	0	0	0	0	0	0	0	0	0	0	0	0	1	2		0	0	0	0	0	0	0	0	0	0	0
1	FEBRUARY	2009	1	0	0	0	0	0	0	0	0	0	0	0	0	1	2		0	0	0	0	0	0	0	0	0	0	0
1	FEBRUARY	2009	1	0	0	0	0	0	0	0	0	0	0	0	0	1	2		0	0	0	0	0	0	0	0	0	0	0
1	FEBRUARY	2009	1	0	0	0	0	0	0	0	0	0	0	0	0	1	2		0	0	0	0	0	0	0	0	0	0	0
1	FEBRUARY	2009	1	0	0	0	0	0	0	0	0	0	0	0	0	1	2		0	0	0	0	0	0	0	0	0	0	0
1	FEBRUARY	2009	1	0	0	0	0	0	0	0	0	0	0	0	0	1	2		0	0	0	0	0	0	0	0	0	0	0
1	FEBRUARY	2009	1	0	0	0	0	0	0	0	0	0	0	0	0	1	2		0	0	0	0	0	0	0	0	0	0	0
1	FEBRUARY	2009	1	0	0	0	0	0	0	0	0	0	0	0	0	1	2		0	0	0	0	0	0	0	0	0	0	0
1	FEBRUARY	2009	1	0	0	0	0	0	0	0	0	0	0	0	0	1	2		0	0	0	0	0	0	0	0	0	0	0
1	FEBRUARY	2009	1	0	0	0	0	0	0	0	0	0	0	0	0	1	2		0	0	0	0	0	0	0	0	0	0	0
1	FEBRUARY	2009	1	0	0	0	0	0	0	0	0	0	0	0	0	1	2		0	0	0	0	0	0	0	0	0	0	0
1	FEBRUARY	2009	1	0	0	0	0	0	0	0	0	0	0	0	0	1	2		0	0	0	0	0	0	0	0	0	0	0
1	FEBRUARY	2009	1	0	0	0	0	0	0	0	0	0	0	0	0	1	2		0	0	0	0	0	0	0	0	0	0	0
1	FEBRUARY	2009	1	0	0	0	0	0	0	0	0	0	0	0	0	1	2		0	0	0	0	0	0	0	0	0	0	0
1	FEBRUARY	2009	1	0	0	0	0	0	0	0	0	0	0	0	0	1	2		0	0	0	0	0	0	0	0	0	0	0
1	FEBRUARY	2009	1	0	0	0	0	0	0	0	0	0	0	0	0	1	2		0	0	0	0	0	0	0	0	0	0	0
1	FEBRUARY	2009	1	0	0	0	0	0	0	0	0	0	0	0	0	1	2		0	0	0	0	0	0	0	0	0	0	0
1	FEBRUARY	2009	1	0	0	0	0	0	0	0	0	0	0	0	0	1	2		0	0	0	0	0	0	0	0	0	0	0
1	FEBRUARY	2009	1	0	0	0	0	0	0	0	0	0	0	0	0	1	2		0	0	0	0	0	0	0	0	0	0	0
1	FEBRUARY	2009	1	0	0	0	0	0	0	0	0	0	0	0	0	1	2		0	0	0	0	0	0	0	0	0	0	0
1	FEBRUARY	2009	1	0	0	0	0	0	0	0	0	0	0	0	0	1	2		0	0	0	0	0	0	0	0	0	0	0
1	FEBRUARY	2009	1	0	0	0	0	0	0	0	0	0	0	0	0	1	2		0	0	0	0	0	0	0	0	0	0	0
1	FEBRUARY	2009	1	0	0	0	0	0	0	0	0	0	0	0	0	1	2		0	0	0	0	0	0	0	0	0	0	0
1	FEBRUARY	2009	1	0	0	0	0	0	0	0	0	0	0	0	0	1	2		0	0	0	0	0	0	0	0	0	0	0
1	FEBRUARY	2009	1	0	0	0	0	0	0	0	0	0	0	0	0	2	2		0	0	0	0	0	0	0	0	0	0	0
1	FEBRUARY	2009	1	0	0	0	0	0	0	0	0	0	0	0	0	2	2		0	0	0	0	0	0	0	0	0	0	0
1	FEBRUARY	2009	1	0	0	0	0	0	0	0	0	0	0	0	0	2	2		0	0	0	0	0	0	0	0	0	0	0
1	FEBRUARY	2009	1	0	0	0	0	0	0	0	0	0	0	0	0	2	2		0	0	0	0	0	0	0	0	0	0	0
1	FEBRUARY	2009	1	0	0	0	0	0	0	0	0	0	0	0	0	2	2		0	0	0	0	0	0	0	0	0	0	0
1	FEBRUARY	2009	1	0	0	0	0	0	0	0	0	0	0	0	0	2	2		0	0	0	0	0	0	0	0	0	0	0
1	FEBRUARY	2009	1	0	0	0	0	0	0	0	0	0	0	0	0	2	2		0	0	0	0	0	0	0	0	0	0	0
1	FEBRUARY	2009	1	0	0	0	0	0	0	0	0	0	0	0	0	2	2		0	0	0	0	0	0	0	0	0	0	0
1	FEBRUARY	2009	1	0	0	0	0	0	0	0	0	0	0	0	0	2	2		0	0	0	0	0	0	0	0	0	0	0
1	FEBRUARY	2009	1	0	0	0	0	0	0	0	0	0	0	0	0	2	2		0	0	0	0	0	0	0	0	0	0	0
1	FEBRUARY	2009	1	0	0	0	0	0	0	0	0	0	0	0	0	2	2		0	0	0	0	0	0	0	0	0	0	0
1	FEBRUARY	2009	1	0	0	0	0	0	0	0	0	0	0	0	0	2	2		0	0	0	0	0	0	0	0	0	0	0
1	FEBRUARY	2009	1	0	0	0	0	0	0	0	0	0	0	0	0	2	2		0	0	0	0	0	0	0	0	0	0	0
1	FEBRUARY	2009	1	0	0	0	0	0	0	0	0	0	0	0	0	2	2		0	0	0	0	0	0	0	0	0	0	0
1	FEBRUARY	2009	1	0	0	0	0	0	0	0	0	0	0	0	0	2	2		0	0	0	0	0	0	0	0	0	0	0
1	FEBRUARY	2009	1	0	0	0	0	0	0	0	0	0	0	0	0	2	2		0	0	0	0	0	0	0	0	0	0	0
1	FEBRUARY	2009	1	0	0	0	0	0	0	0	0	0	0	0	0	2	2		0	0	0	0	0	0	0	0	0	0	0
1	FEBRUARY	2009	1	0	0	0	0	0	0	0	0	0	0	0	0	2	2		0	0	0	0	0	0	0	0	0	0	0
1	FEBRUARY	2009	1	0	0	0	0	0	0	0	0	0	0	0	0	2	2		0	0	0	0	0	0	0	0	0	0	0
1	FEBRUARY	2009	1	0	0	0	0	0	0	0	0	0	0	0	0	2	2		0	0	0	0	0	0	0	0	0	0	0
1	FEBRUARY	2009	1	0	0	0	0	0	0	0	0	0	0	0	0	2	2		0	0	0	0	0	0	0	0	0	0	0
1	FEBRUARY	2009	1	0	0	0	0	0	0	0	0	0	0	0	0	2	2		0	0	0	0	0	0	0	0	0	0	0
1	FEBRUARY	2009	1	0	0	0	0	0	0	0	0	0	0	0	0	2	2		0	0	0	0	0	0	0	0	0	0	0
1	FEBRUARY	2009	1	0	0	0	0	0	0	0	0	0	0	0	0	2	2		0	0	0	0	0	0	0	0	0	0	0
1	FEBRUARY	2009	1	0	0	0	0	0	0	0	0	0	0	0	0	2	2		0	0	0	0	0	0	0	0	0	0	0
1	FEBRUARY	2009	1	0	0	0	0	0	0	0	0	0	0	0	0	2	2		0	0	0	0	0	0	0	0	0	0	0
1	FEBRUARY	2009	1	0	0	0	0	0	0	0	0	0	0	0	0	2	2		0	0	0	0	0	0	0	0	0	0	0
1	FEBRUARY	2009	1	0	0	0	0	0	0	0	0	0	0	0	0	2	2		0	0	0	0	0	0	0	0	0	0	0
1	MARCH	2009	1	0	0	0	0	0	0	0	0	0	0	0	0	1	2		0	0	0	0	0	0	0	0	0	0	0
1	MARCH	2009	1	0	0	0	0	0	0	0	0	0	0	0	0	1	2		0	0	0	0	0	0	0	0	0	0	0
1	MARCH	2009	1	0	0	0	0	0	0	0	0	0	0	0	0	1	2		0	0	0	0	0	0	0	0	0	0	0
1	MARCH	2009	1	0	0	0	0	0	0	0	0	0	0	0	0	1	2		0	0	0	0	0	0	0	0	0	0	0
1	MARCH	2009	1	0	0	0	0	0	0	0	0	0	0	0	0	1	2		0	0	0	0	0	0	0	0	0	0	0
1	MARCH	2009	1	0	0	0	0	0	0	0	0	0	0	0	0	1	2		0	0	0	0	0	0	0	0	0	0	0
1	MARCH	2009	1	0	0	0	0	0	0	0	0	0	0	0	0	1	2		0	0	0	0	0	0	0	0	0	0	0
1	MARCH	2009	1	0	0	0	0	0	0	0	0	0	0	0	0	1	2		0	0	0	0	0	0	0	0	0	0	0
1	MARCH	2009	1	0	0	0	0	0	0	0	0	0	0	0	0	1	2		0	0	0	0	0	0	0	0	0	0	0
1	MARCH	2009	1	0	0	0	0	0	0	0	0	0	0	0	0	1	2		0	0	0	0	0	0	0	0	0	0	0
1	MARCH	2009	1	0	0	0	0	0	0	0	0	0	0	0	0	1	2		0	0	0	0	0	0	0	0	0	0	0
1	MARCH	2009	1	0	0	0	0	0	0	0	0	0	0	0	0	1	2		0	0	0	0	0	0	0	0	0	0	0
1	MARCH	2009	1	0	0	0	0	0	0	0	0	0	0	0	0	1	2		0	0	0	0	0	0	0	0	0	0	0
1	MARCH	2009	1	0	0	0	0	0	0	0	0	0	0	0	0	1	2		0	0	0	0	0	0	0	0	0	0	0
1	MARCH	2009	1	0	0	0	0	0	0	0	0	0	0	0	0	1	2		0	0	0	0	0	0	0	0	0	0	0
1	MARCH	2009	1	0	0	0	0	0	0	0	0	0	0	0	0	1	2		0	0	0	0	0	0	0	0	0	0	0
1	MARCH	2009	1	0	0	0	0	0	0	0	0	0	0	0	0	1	2		0	0	0	0	0	0	0	0	0	0	0
1	MARCH	2009	1	0	0	0	0	0	0	0	0	0	0	0	0	1	2		0	0	0	0	0	0	0	0	0	0	0
1	MARCH	2009	1	0	0	0	0	0	0	0	0	0	0	0	0	1	2		0	0	0	0	0	0	0	0	0	0	0
1	MARCH	2009	1	0	0	0	0	0	0	0	0	0	0	0	0	1	2		0	0	0	0	0	0	0	0	0	0	0
1	MARCH	2009	1	0	0	0	0	0	0	0	0	0	0	0	0	1	2		0	0	0	0	0	0	0	0	0	0	0
1	MARCH	2009	1	0	0	0	0	0	0	0	0	0	0	0	0	1	2		0	0	0	0	0	0	0	0	0	0	0
1	MARCH	2009	1	0	0	0	0	0	0	0	0	0	0	0	0	1	2		0	0	0	0	0	0	0	0	0	0	0
1	MARCH	2009	1	0	0	0	0	0	0	0	0	0	0	0	0	1	2		0	0	0	0	0	0	0	0	0	0	0
1	MARCH	2009	1	0	0	0	0	0	0	0	0	0	0	0	0	1	2		0	0	0	0	0	0	0	0	0	0	0
1	MARCH	2009	1	0	0	0	0	0	0	0	0	0	0	0	0	1	2		0	0	0	0	0	0	0	0	0	0	0
1	MARCH	2009	1	0	0	0	0	0	0	0	0	0	0	0	0	1	2		0	0	0	0	0	0	0	0	0	0	0
1	MARCH	2009	1	0	0	0	0	0	0	0	0	0	0	0	0	1	2		0	0	0	0	0	0	0	0	0	0	0
1	MARCH	2009	1	0	0	0	0	0	0	0	0	0	0	0	0	1	2		0	0	0	0	0	0	0	0	0	0	0
1	MARCH	2009	1	0	0	0	0	0	0	0	0	0	0	0	0	1	2		0	0	0	0	0	0	0	0	0	0	0
1	MARCH	2009	1	0	0	0	0	0	0	0	0	0	0	0	0	1	2		0	0	0	0	0	0	0	0	0	0	0
1	MARCH	2009	1	0	0	0	0	0	0	0	0	0	0	0	0	1	2		0	0	0	0	0	0	0	0	0	0	0
1	MARCH	2009	1	0	0	0	0	0	0	0	0	0	0	0	0	1	2		0	0	0	0	0	0	0	0	0	0	0
1	MARCH	2009	1	0	0	0	0	0	0	0	0	0	0	0	0	1	2		0	0	0	0	0	0	0	0	0	0	0
1	MARCH	2009	1	0	0	0	0	0	0	0	0	0	0	0	0	1	2		0	0	0	0	0	0	0	0	0	0	0
1	MARCH	2009	1	0	0	0	0	0	0	0	0	0	0	0	0	1	2		0	0	0	0	0	0	0	0	0	0	0
1	MARCH	2009	1	0	0	0	0	0	0	0	0	0	0	0	0	1	2		0	0	0	0	0	0	0	0	0	0	0
1	MARCH	2009	1	0	0	0	0	0	0	0	0	0	0	0	0	1	2		0	0	0	0	0	0	0	0	0	0	0
1	MARCH	2009	1	0	0	0	0	0	0	0	0	0	0	0	0	1	2		0	0	0	0	0	0	0	0	0	0	0
1	MARCH	2009	1	0	0	0	0	0	0	0	0	0	0	0	0	1	2		0	0	0	0	0	0	0	0	0	0	0
1	MARCH	2009	1	0	0	0	0	0	0	0	0	0	0	0	0	1	2		0	0	0	0	0	0	0	0	0	0	0
1	MARCH	2009	1	0	0	0	0	0	0	0	0	0	0	0	0	1	2		0	0	0	0	0	0	0	0	0	0	0
1	MARCH	2009	1	0	0	0	0	0	0	0	0	0	0	0	0	1	2		0	0	0	0	0	0	0	0	0	0	0
1	MARCH	2009	1	0	0	0	0	0	0	0	0	0	0	0	0	1	2		0	0	0	0	0	0	0	0	0	0	0
1	MARCH	2009	1	0	0	0	0	0	0	0	0	0	0	0	0	1	2		0	0	0	0	0	0	0	0	0	0	0
1	MARCH	2009	1	0	0	0	0	0	0	0	0	0	0	0	0	1	2		0	0	0	0	0	0	0	0	0	0	0
1	MARCH	2009	1	0	0	0	0	0	0	0	0	0	0	0	0	1	2		0	0	0	0	0	0	0	0	0	0	0
1	MARCH	2009	1	0	0	0	0	0	0	0	0	0	0	0	0	1	2		0	0	0	0	0	0	0	0	0	0	0
1	MARCH	2009	1	0	0	0	0	0	0	0	0	0	0	0	0	1	2		0	0	0	0	0	0	0	0	0	0	0
1	MARCH	2009	1	0	0	0	0	0	0	0	0	0	0	0	0	1	2		0	0	0	0	0	0	0	0	0	0	0
1	MARCH	2009	1	0	0	0	0	0	0	0	0	0	0	0	0	1	2		0	0	0	0	0	0	0	0	0	0	0
1	MARCH	2009	1	0	0	0	0	0	0	0	0	0	0	0	0	1	2		0	0	0	0	0	0	0	0	0	0	0
1	MARCH	2009	1	0	0	0	0	0	0	0	0	0	0	0	0	1	2		0	0	0	0	0	0	0	0	0	0	0
1	MARCH	2009	1	0	0	0	0	0	0	0	0	0	0	0	0	1	2		0	0	0	0	0	0	0	0	0	0	0
1	MARCH	2009	1	0	0	0	0	0	0	0	0	0	0	0	0	1	2		0	0	0	0	0	0	0	0	0	0	0
1	MARCH	2009	1	0	0	0	0	0	0	0	0	0	0	0	0	1	2		0	0	0	0	0	0	0	0	0	0	0
1	MARCH	2009	1	0	0	0	0	0	0	0	0	0	0	0	0	1	2		0	0	0	0	0	0	0	0	0	0	0
1	MARCH	2009	1	0	0	0	0	0	0	0	0	0	0	0	0	1	2		0	0	0	0	0	0	0	0	0	0	0
1	MARCH	2009	1	0	0	0	0	0	0	0	0	0	0	0	0	1	2		0	0	0	0	0	0	0	0	0	0	0
1	MARCH	2009	1	0	0	0	0	0	0	0	0	0	0	0	0	1	2		0	0	0	0	0	0	0	0	0	0	0
1	MARCH	2009	1	0	0	0	0	0	0	0	0	0	0	0	0	1	2		0	0	0	0	0	0	0	0	0	0	0
1	MARCH	2009	1	0	0	0	0	0	0	0	0	0	0	0	0	1	2		0	0	0	0	0	0	0	0	0	0	0
1	MARCH	2009	1	0	0	0	0	0	0	0	0	0	0	0	0	1	2		0	0	0	0	0	0	0	0	0	0	0
1	MARCH	2009	1	0	0	0	0	0	0	0	0	0	0	0	0	1	2		0	0	0	0	0	0	0	0	0	0	0
1	MARCH	2009	1	0	0	0	0	0	0	0	0	0	0	0	0	1	2		0	0	0	0	0	0	0	0	0	0	0
1	MARCH	2009	1	0	0	0	0	0	0	0	0	0	0	0	0	1	2		0	0	0	0	0	0	0	0	0	0	0
1	MARCH	2009	1	0	0	0	0	0	0	0	0	0	0	0	0	1	2		0	0	0	0	0	0	0	0	0	0	0
1	MARCH	2009	1	0	0	0	0	0	0	0	0	0	0	0	0	1	2		0	0	0	0	0	0	0	0	0	0	0
1	MARCH	2009	1	0	0	0	0	0	0	0	0	0	0	0	0	1	2		0	0	0	0	0	0	0	0	0	0	0
1	MARCH	2009	1	0	0	0	0	0	0	0	0	0	0	0	0	1	2		0	0	0	0	0	0	0	0	0	0	0
1	MARCH	2009	1	0	0	0	0	0	0	0	0	0	0	0	0	1	2		0	0	0	0	0	0	0	0	0	0	0
1	MARCH	2009	1	0	0	0	0	0	0	0	0	0	0	0	0	1	2		0	0	0	0	0	0	0	0	0	0	0
1	MARCH	2009	1	0	0	0	0	0	0	0	0	0	0	0	0	1	2		0	0	0	0	0	0	0	0	0	0	0
1	MARCH	2009	1	0	0	0	0	0	0	0	0	0	0	0	0	1	2		0	0	0	0	0	0	0	0	0	0	0
1	MARCH	2009	1	0	0	0	0	0	0	0	0	0	0	0	0	1	2		0	0	0	0	0	0	0	0	0	0	0
1	MARCH	2009	1	0	0	0	0	0	0	0	0	0	0	0	0	1	2		0	0	0	0	0	0	0	0	0	0	0
1	MARCH	2009	1	0	0	0	0	0	0	0	0	0	0	0	0	1	2		0	0	0	0	0	0	0	0	0	0	0
1	MARCH	2009	1	0	0	0	0	0	0	0	0	0	0	0	0	1	2		0	0	0	0	0	0	0	0	0	0	0
1	MARCH	2009	1	0	0	0	0	0	0	0	0	0	0	0	0	1	2		0	0	0	0	0	0	0	0	0	0	0
1	MARCH	2009	1	0	0	0	0	0	0	0	0	0	0	0	0	1	2		0	0	0	0	0	0	0	0	0	0	0
1	MARCH	2009	1	0	0	0	0	0	0	0	0	0	0	0	0	1	2		0	0	0	0	0	0	0	0	0	0	0
1	MARCH	2009	1	0	0	0	0	0	0	0	0	0	0	0	0	1	2		0	0	0	0	0	0	0	0	0	0	0
1	MARCH	2009	1	0	0	0	0	0	0	0	0	0	0	0	0	1	2		0	0	0	0	0	0	0	0	0	0	0
1	MARCH	2009	1	0	0	0	0	0	0	0	0	0	0	0	0	1	2		0	0	0	0	0	0	0	0	0	0	0
1	MARCH	2009	1	0	0	0	0	0	0	0	0	0	0	0	0	1	2		0	0	0	0	0	0	0	0	0	0	0
1	MARCH	2009	1	0	0	0	0	0	0	0	0	0	0	0	0	1	2		0	0	0	0	0	0	0	0	0	0	0
1	MARCH	2009	1	0	0	0	0	0	0	0	0	0	0	0	0	1	2		0	0	0	0	0	0	0	0	0	0	0
1	MARCH	2009	1	0	0	0	0	0	0	0	0	0	0	0	0	1	2		0	0	0	0	0	0	0	0	0	0	0
1	MARCH	2009	1	0	0	0	0	0	0	0	0	0	0	0	0	1	2		0	0	0	0	0	0	0	0	0	0	0
1	MARCH	2009	1	0	0	0	0	0	0	0	0	0	0	0	0	1	2		0	0	0	0	0	0	0	0	0	0	0
1	MARCH	2009	1	0	0	0	0	0	0	0	0	0	0	0	0	1	2		0	0	0	0	0	0	0	0	0	0	0
1	MARCH	2009	1	0	0	0	0	0	0	0	0	0	0	0	0	1	2		0	0	0	0	0	0	0	0	0	0	0
1	MARCH	2009	1	0	0	0	0	0	0	0	0	0	0	0	0	1	2		0	0	0	0	0	0	0	0	0	0	0
1	MARCH	2009	1	0	0	0	0	0	0	0	0	0	0	0	0	1	2		0	0	0	0	0	0	0	0	0	0	0
1	MARCH	2009	1	0	0	0	0	0	0	0	0	0	0	0	0	1	2		0	0	0	0	0	0	0	0	0	0	0
1	MARCH	2009	1	0	0	0	0	0	0	0	0	0	0	0	0	1	2		0	0	0	0	0	0	0	0	0	0	0
1	MARCH	2009	1	0	0	0	0	0	0	0	0	0	0	0	0	1	2		0	0	0	0	0	0	0	0	0	0	0
1	MARCH	2009	1	0	0	0	0	0	0	0	0	0	0	0	0	1	2		0	0	0	0	0	0	0	0	0	0	0
1	MARCH	2009	1	0	0	0	0	0	0	0	0	0	0	0	0	1	2		0	0	0	0	0	0	0	0	0	0	0
1	MARCH	2009	1	0	0	0	0	0	0	0	0	0	0	0	0	1	2		0	0	0	0	0	0	0	0	0	0	0
1	MARCH	2009	1	0	0	0	0	0	0	0	0	0	0	0	0	1	2		0	0	0	0	0	0	0	0	0	0	0
1	MARCH	2009	1	0	0	0	0	0	0	0	0	0	0	0	0	1	2		0	0	0	0	0	0	0	0	0	0	0
1	MARCH	2009	1	0	0	0	0	0	0	0	0	0	0	0	0	1	2		0	0	0	0	0	0	0	0	0	0	0
1	MARCH	2009	1	0	0	0	0	0	0	0	0	0	0	0	0	1	2		0	0	0	0	0	0	0	0	0	0	0
1	MARCH	2009	1	0	0	0	0	0	0	0	0	0	0	0	0	1	2		0	0	0	0	0	0	0	0	0	0	0
1	MARCH	2009	1	0	0	0	0	0	0	0	0	0	0	0	0	1	2		0	0	0	0	0	0	0	0	0	0	0
1	MARCH	2009	1	0	0	0	0	0	0	0	0	0	0	0	0	1	2		0	0	0	0	0	0	0	0	0	0	0
1	MARCH	2009	1	0	0	0	0	0	0	0	0	0	0	0	0	1	2		0	0	0	0	0	0	0	0	0	0	0
1	MARCH	2009	1	0	0	0	0	0	0	0	0	0	0	0	0	1	2		0	0	0	0	0	0	0	0	0	0	0
1	MARCH	2009	1	0	0	0	0	0	0	0	0	0	0	0	0	1	2		0	0	0	0	0	0	0	0	0	0	0
1	MARCH	2009	1	0	0	0	0	0	0	0	0	0	0	0	0	1	2		0	0	0	0	0	0	0	0	0	0	0
1	MARCH	2009	1	0	0	0	0	0	0	0	0	0	0	0	0	1	2		0	0	0	0	0	0	0	0	0	0	0
1	MARCH	2009	1	0	0	0	0	0	0	0	0	0	0	0	0	1	2		0	0	0	0	0	0	0	0	0	0	0
1	MARCH	2009	1	0	0	0	0	0	0	0	0	0	0	0	0	1	2		0	0	0	0	0	0	0	0	0	0	0
1	MARCH	2009	1	0	0	0	0	0	0	0	0	0	0	0	0	1	2		0	0	0	0	0	0	0	0	0	0	0
1	MARCH	2009	1	0	0	0	0	0	0	0	0	0	0	0	0	1	2		0	0	0	0	0	0	0	0	0	0	0
1	MARCH	2009	1	0	0	0	0	0	0	0	0	0	0	0	0	1	2		0	0	0	0	0	0	0	0	0	0	0
1	MARCH	2009	1	0	0	0	0	0	0	0	0	0	0	0	0	1	2		0	0	0	0	0	0	0	0	0	0	0
1	MARCH	2009	1	0	0	0	0	0	0	0	0	0	0	0	0	1	2		0	0	0	0	0	0	0	0	0	0	0
1	MARCH	2009	1	0	0	0	0	0	0	0	0	0	0	0	0	1	2		0	0	0	0	0	0	0	0	0	0	0
1	MARCH	2009	1	0	0	0	0	0	0	0	0	0	0	0	0	1	2		0	0	0	0	0	0	0	0	0	0	0
1	MARCH	2009	1	0	0	0	0	0	0	0	0	0	0	0	0	1	2		0	0	0	0	0	0	0	0	0	0	0
1	MARCH	2009	1	0	0	0	0	0	0	0	0	0	0	0	0	1	2		0	0	0	0	0	0	0	0	0	0	0
1	MARCH	2009	1	0	0	0	0	0	0	0	0	0	0	0	0	1	2		0	0	0	0	0	0	0	0	0	0	0
1	MARCH	2009	1	0	0	0	0	0	0	0	0	0	0	0	0	1	2		0	0	0	0	0	0	0	0	0	0	0
1	MARCH	2009	1	0	0	0	0	0	0	0	0	0	0	0	0	1	2		0	0	0	0	0	0	0	0	0	0	0
1	MARCH	2009	1	0	0	0	0	0	0	0	0	0	0	0	0	1	2		0	0	0	0	0	0	0	0	0	0	0
1	MARCH	2009	1	0	0	0	0	0	0	0	0	0	0	0	0	1	2		0	0	0	0	0	0	0	0	0	0	0
1	MARCH	2009	1	0	0	0	0	0	0	0	0	0	0	0	0	1	2		0	0	0	0	0	0	0	0	0	0	0
1	MARCH	2009	1	0	0	0	0	0	0	0	0	0	0	0	0	1	2		0	0	0	0	0	0	0	0	0	0	0
1	MARCH	2009	1	0	0	0	0	0	0	0	0	0	0	0	0	1	2		0	0	0	0	0	0	0	0	0	0	0
1	MARCH	2009	1	0	0	0	0	0	0	0	0	0	0	0	0	1	2		0	0	0	0	0	0	0	0	0	0	0
1	MARCH	2009	1	0	0	0	0	0	0	0	0	0	0	0	0	1	2		0	0	0	0	0	0	0	0	0	0	0
1	MARCH	2009	1	0	0	0	0	0	0	0	0	0	0	0	0	2	2		0	0	0	0	0	0	0	0	0	0	0
1	MARCH	2009	1	0	0	0	0	0	0	0	0	0	0	0	0	2	2		0	0	0	0	0	0	0	0	0	0	0
1	MARCH	2009	1	0	0	0	0	0	0	0	0	0	0	0	0	2	2		0	0	0	0	0	0	0	0	0	0	0
1	MARCH	2009	1	0	0	0	0	0	0	0	0	0	0	0	0	2	2		0	0	0	0	0	0	0	0	0	0	0
1	MARCH	2009	1	0	0	0	0	0	0	0	0	0	0	0	0	2	2		0	0	0	0	0	0	0	0	0	0	0
1	MARCH	2009	1	0	0	0	0	0	0	0	0	0	0	0	0	2	2		0	0	0	0	0	0	0	0	0	0	0
1	MARCH	2009	1	0	0	0	0	0	0	0	0	0	0	0	0	2	2		0	0	0	0	0	0	0	0	0	0	0
1	MARCH	2009	1	0	0	0	0	0	0	0	0	0	0	0	0	2	2		0	0	0	0	0	0	0	0	0	0	0
1	MARCH	2009	1	0	0	0	0	0	0	0	0	0	0	0	0	2	2		0	0	0	0	0	0	0	0	0	0	0
1	MARCH	2009	1	0	0	0	0	0	0	0	0	0	0	0	0	2	2		0	0	0	0	0	0	0	0	0	0	0
1	MARCH	2009	1	0	0	0	0	0	0	0	0	0	0	0	0	2	2		0	0	0	0	0	0	0	0	0	0	0
1	MARCH	2009	1	0	0	0	0	0	0	0	0	0	0	0	0	2	2		0	0	0	0	0	0	0	0	0	0	0
1	MARCH	2009	1	0	0	0	0	0	0	0	0	0	0	0	0	2	2		0	0	0	0	0	0	0	0	0	0	0
1	MARCH	2009	1	0	0	0	0	0	0	0	0	0	0	0	0	2	2		0	0	0	0	0	0	0	0	0	0	0
1	MARCH	2009	1	0	0	0	0	0	0	0	0	0	0	0	0	2	2		0	0	0	0	0	0	0	0	0	0	0
1	MARCH	2009	1	0	0	0	0	0	0	0	0	0	0	0	0	2	2		0	0	0	0	0	0	0	0	0	0	0
1	MARCH	2009	1	0	0	0	0	0	0	0	0	0	0	0	0	2	2		0	0	0	0	0	0	0	0	0	0	0
1	MARCH	2009	1	0	0	0	0	0	0	0	0	0	0	0	0	2	2		0	0	0	0	0	0	0	0	0	0	0
1	MARCH	2009	1	0	0	0	0	0	0	0	0	0	0	0	0	2	2		0	0	0	0	0	0	0	0	0	0	0
1	MARCH	2009	1	0	0	0	0	0	0	0	0	0	0	0	0	2	2		0	0	0	0	0	0	0	0	0	0	0
1	MARCH	2009	1	0	0	0	0	0	0	0	0	0	0	0	0	2	2		0	0	0	0	0	0	0	0	0	0	0
1	MARCH	2009	1	0	0	0	0	0	0	0	0	0	0	0	0	2	2		0	0	0	0	0	0	0	0	0	0	0
1	MARCH	2009	1	0	0	0	0	0	0	0	0	0	0	0	0	2	2		0	0	0	0	0	0	0	0	0	0	0
1	MARCH	2009	1	0	0	0	0	0	0	0	0	0	0	0	0	2	2		0	0	0	0	0	0	0	0	0	0	0
1	MARCH	2009	1	0	0	0	0	0	0	0	0	0	0	0	0	2	2		0	0	0	0	0	0	0	0	0	0	0
1	MARCH	2009	1	0	0	0	0	0	0	0	0	0	0	0	0	2	2		0	0	0	0	0	0	0	0	0	0	0
1	MARCH	2009	1	0	0	0	0	0	0	0	0	0	0	0	0	2	2		0	0	0	0	0	0	0	0	0	0	0
1	MARCH	2009	1	0	0	0	0	0	0	0	0	0	0	0	0	2	2		0	0	0	0	0	0	0	0	0	0	0
1	MARCH	2009	1	0	0	0	0	0	0	0	0	0	0	0	0	2	2		0	0	0	0	0	0	0	0	0	0	0
1	MARCH	2009	1	0	0	0	0	0	0	0	0	0	0	0	0	2	2		0	0	0	0	0	0	0	0	0	0	0
1	MARCH	2009	1	0	0	0	0	0	0	0	0	0	0	0	0	2	2		0	0	0	0	0	0	0	0	0	0	0
1	MARCH	2009	1	0	0	0	0	0	0	0	0	0	0	0	0	2	2		0	0	0	0	0	0	0	0	0	0	0
1	MARCH	2009	1	0	0	0	0	0	0	0	0	0	0	0	0	2	2		0	0	0	0	0	0	0	0	0	0	0
1	MARCH	2009	1	0	0	0	0	0	0	0	0	0	0	0	0	2	2		0	0	0	0	0	0	0	0	0	0	0
1	MARCH	2009	1	0	0	0	0	0	0	0	0	0	0	0	0	2	2		0	0	0	0	0	0	0	0	0	0	0
1	MARCH	2009	1	0	0	0	0	0	0	0	0	0	0	0	0	2	2		0	0	0	0	0	0	0	0	0	0	0
1	MARCH	2009	1	0	0	0	0	0	0	0	0	0	0	0	0	2	2		0	0	0	0	0	0	0	0	0	0	0
1	MARCH	2009	1	0	0	0	0	0	0	0	0	0	0	0	0	2	2		0	0	0	0	0	0	0	0	0	0	0
1	MARCH	2009	1	0	0	0	0	0	0	0	0	0	0	0	0	2	2		0	0	0	0	0	0	0	0	0	0	0
1	MARCH	2009	1	0	0	0	0	0	0	0	0	0	0	0	0	2	2		0	0	0	0	0	0	0	0	0	0	0
1	MARCH	2009	1	0	0	0	0	0	0	0	0	0	0	0	0	2	2		0	0	0	0	0	0	0	0	0	0	0
1	MARCH	2009	1	0	0	0	0	0	0	0	0	0	0	0	0	2	2		0	0	0	0	0	0	0	0	0	0	0
1	MARCH	2009	1	0	0	0	0	0	0	0	0	0	0	0	0	2	2		0	0	0	0	0	0	0	0	0	0	0
1	MARCH	2009	1	0	0	0	0	0	0	0	0	0	0	0	0	2	2		0	0	0	0	0	0	0	0	0	0	0
1	MARCH	2009	1	0	0	0	0	0	0	0	0	0	0	0	0	2	2		0	0	0	0	0	0	0	0	0	0	0
1	MARCH	2009	1	0	0	0	0	0	0	0	0	0	0	0	0	2	2		0	0	0	0	0	0	0	0	0	0	0
1	MARCH	2009	1	0	0	0	0	0	0	0	0	0	0	0	0	2	2		0	0	0	0	0	0	0	0	0	0	0
1	MARCH	2009	1	0	0	0	0	0	0	0	0	0	0	0	0	2	2		0	0	0	0	0	0	0	0	0	0	0
1	MARCH	2009	1	0	0	0	0	0	0	0	0	0	0	0	0	2	2		0	0	0	0	0	0	0	0	0	0	0
1	MARCH	2009	1	0	0	0	0	0	0	0	0	0	0	0	0	2	2		0	0	0	0	0	0	0	0	0	0	0
1	MARCH	2009	1	0	0	0	0	0	0	0	0	0	0	0	0	2	2		0	0	0	0	0	0	0	0	0	0	0
1	MARCH	2009	1	0	0	0	0	0	0	0	0	0	0	0	0	2	2		0	0	0	0	0	0	0	0	0	0	0
1	MARCH	2009	1	0	0	0	0	0	0	0	0	0	0	0	0	2	2		0	0	0	0	0	0	0	0	0	0	0
1	MARCH	2009	1	0	0	0	0	0	0	0	0	0	0	0	0	2	2		0	0	0	0	0	0	0	0	0	0	0
1	MARCH	2009	1	0	0	0	0	0	0	0	0	0	0	0	0	2	2		0	0	0	0	0	0	0	0	0	0	0
1	MARCH	2009	1	0	0	0	0	0	0	0	0	0	0	0	0	2	2		0	0	0	0	0	0	0	0	0	0	0
1	MARCH	2009	1	0	0	0	0	0	0	0	0	0	0	0	0	2	2		0	0	0	0	0	0	0	0	0	0	0
1	MARCH	2009	1	0	0	0	0	0	0	0	0	0	0	0	0	2	2		0	0	0	0	0	0	0	0	0	0	0
1	MARCH	2009	1	0	0	0	0	0	0	0	0	0	0	0	0	2	2		0	0	0	0	0	0	0	0	0	0	0
1	MARCH	2009	1	0	0	0	0	0	0	0	0	0	0	0	0	2	2		0	0	0	0	0	0	0	0	0	0	0
1	MARCH	2009	1	0	0	0	0	0	0	0	0	0	0	0	0	2	2		0	0	0	0	0	0	0	0	0	0	0
1	MARCH	2009	1	0	0	0	0	0	0	0	0	0	0	0	0	2	2		0	0	0	0	0	0	0	0	0	0	0
1	MARCH	2009	1	0	0	0	0	0	0	0	0	0	0	0	0	2	2		0	0	0	0	0	0	0	0	0	0	0
1	MARCH	2009	1	0	0	0	0	0	0	0	0	0	0	0	0	2	2		0	0	0	0	0	0	0	0	0	0	0
1	MARCH	2009	1	0	0	0	0	0	0	0	0	0	0	0	0	2	2		0	0	0	0	0	0	0	0	0	0	0
1	MARCH	2009	1	0	0	0	0	0	0	0	0	0	0	0	0	2	2		0	0	0	0	0	0	0	0	0	0	0
1	MARCH	2009	1	0	0	0	0	0	0	0	0	0	0	0	0	2	2		0	0	0	0	0	0	0	0	0	0	0
1	MARCH	2009	1	0	0	0	0	0	0	0	0	0	0	0	0	2	2		0	0	0	0	0	0	0	0	0	0	0
1	MARCH	2009	1	0	0	0	0	0	0	0	0	0	0	0	0	2	2		0	0	0	0	0	0	0	0	0	0	0
1	MARCH	2009	1	0	0	0	0	0	0	0	0	0	0	0	0	2	2		0	0	0	0	0	0	0	0	0	0	0
1	MARCH	2009	1	0	0	0	0	0	0	0	0	0	0	0	0	2	2		0	0	0	0	0	0	0	0	0	0	0
1	MARCH	2009	1	0	0	0	0	0	0	0	0	0	0	0	0	2	2		0	0	0	0	0	0	0	0	0	0	0
1	MARCH	2009	1	0	0	0	0	0	0	0	0	0	0	0	0	2	2		0	0	0	0	0	0	0	0	0	0	0
1	MARCH	2009	1	0	0	0	0	0	0	0	0	0	0	0	0	2	2		0	0	0	0	0	0	0	0	0	0	0
1	MARCH	2009	1	0	0	0	0	0	0	0	0	0	0	0	0	2	2		0	0	0	0	0	0	0	0	0	0	0
1	MARCH	2009	1	0	0	0	0	0	0	0	0	0	0	0	0	2	2		0	0	0	0	0	0	0	0	0	0	0
1	MARCH	2009	1	0	0	0	0	0	0	0	0	0	0	0	0	2	2		0	0	0	0	0	0	0	0	0	0	0
1	MARCH	2009	1	0	0	0	0	0	0	0	0	0	0	0	0	2	2		0	0	0	0	0	0	0	0	0	0	0
1	MARCH	2009	1	0	0	0	0	0	0	0	0	0	0	0	0	2	2		0	0	0	0	0	0	0	0	0	0	0
1	MARCH	2009	1	0	0	0	0	0	0	0	0	0	0	0	0	2	2		0	0	0	0	0	0	0	0	0	0	0
1	MARCH	2009	1	0	0	0	0	0	0	0	0	0	0	0	0	2	2		0	0	0	0	0	0	0	0	0	0	0
1	MARCH	2009	1	0	0	0	0	0	0	0	0	0	0	0	0	2	2		0	0	0	0	0	0	0	0	0	0	0
1	MARCH	2009	1	0	0	0	0	0	0	0	0	0	0	0	0	2	2		0	0	0	0	0	0	0	0	0	0	0
1	MARCH	2009	1	0	0	0	0	0	0	0	0	0	0	0	0	2	2		0	0	0	0	0	0	0	0	0	0	0
1	MARCH	2009	1	0	0	0	0	0	0	0	0	0	0	0	0	2	2		0	0	0	0	0	0	0	0	0	0	0
1	MARCH	2009	1	0	0	0	0	0	0	0	0	0	0	0	0	2	2		0	0	0	0	0	0	0	0	0	0	0
1	MARCH	2009	1	0	0	0	0	0	0	0	0	0	0	0	0	2	2		0	0	0	0	0	0	0	0	0	0	0
1	MARCH	2009	1	0	0	0	0	0	0	0	0	0	0	0	0	2	2		0	0	0	0	0	0	0	0	0	0	0
1	MARCH	2009	1	0	0	0	0	0	0	0	0	0	0	0	0	2	2		0	0	0	0	0	0	0	0	0	0	0
1	MARCH	2009	1	0	0	0	0	0	0	0	0	0	0	0	0	2	2		0	0	0	0	0	0	0	0	0	0	0
1	MARCH	2009	1	0	0	0	0	0	0	0	0	0	0	0	0	2	2		0	0	0	0	0	0	0	0	0	0	0
1	MARCH	2009	1	0	0	0	0	0	0	0	0	0	0	0	0	2	2		0	0	0	0	0	0	0	0	0	0	0
1	MARCH	2009	1	0	0	0	0	0	0	0	0	0	0	0	0	2	2		0	0	0	0	0	0	0	0	0	0	0
1	MARCH	2009	1	0	0	0	0	0	0	0	0	0	0	0	0	2	2		0	0	0	0	0	0	0	0	0	0	0
1	MARCH	2009	1	0	0	0	0	0	0	0	0	0	0	0	0	2	2		0	0	0	0	0	0	0	0	0	0	0
1	MARCH	2009	1	0	0	0	0	0	0	0	0	0	0	0	0	2	2		0	0	0	0	0	0	0	0	0	0	0
1	MARCH	2009	1	0	0	0	0	0	0	0	0	0	0	0	0	2	2		0	0	0	0	0	0	0	0	0	0	0
1	MARCH	2009	1	0	0	0	0	0	0	0	0	0	0	0	0	2	2		0	0	0	0	0	0	0	0	0	0	0
1	MARCH	2009	1	0	0	0	0	0	0	0	0	0	0	0	0	2	2		0	0	0	0	0	0	0	0	0	0	0
1	MARCH	2009	1	0	0	0	0	0	0	0	0	0	0	0	0	2	2		0	0	0	0	0	0	0	0	0	0	0
1	MARCH	2009	1	0	0	0	0	0	0	0	0	0	0	0	0	2	2		0	0	0	0	0	0	0	0	0	0	0
1	MARCH	2009	1	0	0	0	0	0	0	0	0	0	0	0	0	2	2		0	0	0	0	0	0	0	0	0	0	0
1	MARCH	2009	1	0	0	0	0	0	0	0	0	0	0	0	0	2	2		0	0	0	0	0	0	0	0	0	0	0
1	MARCH	2009	1	0	0	0	0	0	0	0	0	0	0	0	0	2	2		0	0	0	0	0	0	0	0	0	0	0
1	MARCH	2009	1	0	0	0	0	0	0	0	0	0	0	0	0	2	2		0	0	0	0	0	0	0	0	0	0	0
1	MARCH	2009	1	0	0	0	0	0	0	0	0	0	0	0	0	2	2		0	0	0	0	0	0	0	0	0	0	0
1	MARCH	2009	1	0	0	0	0	0	0	0	0	0	0	0	0	2	2		0	0	0	0	0	0	0	0	0	0	0
1	MARCH	2009	1	0	0	0	0	0	0	0	0	0	0	0	0	2	2		0	0	0	0	0	0	0	0	0	0	0
1	MARCH	2009	1	0	0	0	0	0	0	0	0	0	0	0	0	2	2		0	0	0	0	0	0	0	0	0	0	0
1	MARCH	2009	1	0	0	0	0	0	0	0	0	0	0	0	0	2	2		0	0	0	0	0	0	0	0	0	0	0
1	MARCH	2009	1	0	0	0	0	0	0	0	0	0	0	0	0	2	2		0	0	0	0	0	0	0	0	0	0	0
1	MARCH	2009	1	0	0	0	0	0	0	0	0	0	0	0	0	2	2		0	0	0	0	0	0	0	0	0	0	0
1	MARCH	2009	1	0	0	0	0	0	0	0	0	0	0	0	0	2	2		0	0	0	0	0	0	0	0	0	0	0
1	MARCH	2009	1	0	0	0	0	0	0	0	0	0	0	0	0	2	2		0	0	0	0	0	0	0	0	0	0	0
1	MARCH	2009	1	0	0	0	0	0	0	0	0	0	0	0	0	2	2		0	0	0	0	0	0	0	0	0	0	0

## Sheet: AF-AD-mixed
code	month	year	specie	A FL	A FF	A WS	A BG	A FT	A EA	A AT	A AM	A GS	A GSP	A all/M	SR count	sex	stage		PRESENCE	P FL	P FF	P WS	P BG	P FT	P EA	P AT	P AM	P GS	P GSP	INTENSITY	I FL	I FF	I WS	I BG	I FT	I EA	I AT	I AM	I GS	I GSP
3	1	2009	1	1	0	0	0	0	0	0	0	0	0	1	1	2	1		1	1	0	0	0	0	0	0	0	0	0	1	1
3	1	2009	1	1	0	0	0	0	0	0	0	0	0	1	1	2	1		1	1	0	0	0	0	0	0	0	0	0	1	1
3	1	2009	1	1	0	0	0	0	0	0	0	0	0	1	1	2	1		1	1	0	0	0	0	0	0	0	0	0	1	1
3	1	2009	1	1	0	0	0	0	0	0	0	0	0	1	1	2	1		1	1	0	0	0	0	0	0	0	0	0	1	1
3	1	2009	1	0	1	0	0	0	0	0	0	0	0	1	1	2	1		1	0	1	0	0	0	0	0	0	0	0	1		1
3	1	2009	1	0	1	0	0	0	0	0	0	0	0	1	1	2	1		1	0	1	0	0	0	0	0	0	0	0	1		1
3	1	2009	1	0	1	0	0	0	0	0	0	0	0	1	1	1	1		1	0	1	0	0	0	0	0	0	0	0	1		1
3	1	2009	1	0	0	0	0	0	1	0	0	0	0	1	1	1	1		1	0	0	0	0	0	1	0	0	0	0	1						1
3	1	2009	1	0	0	0	0	0	0	0	0	0	0	0		2	1		0	0	0	0	0	0	0	0	0	0	0
3	1	2009	1	0	0	0	0	0	0	0	0	0	0	0		2	1		0	0	0	0	0	0	0	0	0	0	0
3	1	2009	1	0	0	0	0	0	0	0	0	0	0	0		2	1		0	0	0	0	0	0	0	0	0	0	0
3	1	2009	1	0	0	0	0	0	0	0	0	0	0	0		2	1		0	0	0	0	0	0	0	0	0	0	0
3	1	2009	1	0	0	0	0	0	0	0	0	0	0	0		2	1		0	0	0	0	0	0	0	0	0	0	0
3	1	2009	1	0	0	0	0	0	0	0	0	0	0	0		2	1		0	0	0	0	0	0	0	0	0	0	0
3	1	2009	1	0	0	0	0	0	0	0	0	0	0	0		2	1		0	0	0	0	0	0	0	0	0	0	0
3	1	2009	1	0	0	0	0	0	0	0	0	0	0	0		2	1		0	0	0	0	0	0	0	0	0	0	0
3	1	2009	1	0	0	0	0	0	0	0	0	0	0	0		2	1		0	0	0	0	0	0	0	0	0	0	0
3	1	2009	1	0	0	0	0	0	0	0	0	0	0	0		2	1		0	0	0	0	0	0	0	0	0	0	0
3	1	2009	1	0	0	0	0	0	0	0	0	0	0	0		2	1		0	0	0	0	0	0	0	0	0	0	0
3	1	2009	1	0	0	0	0	0	0	0	0	0	0	0		2	1		0	0	0	0	0	0	0	0	0	0	0
3	1	2009	1	0	0	0	0	0	0	0	0	0	0	0		2	1		0	0	0	0	0	0	0	0	0	0	0
3	1	2009	1	0	0	0	0	0	0	0	0	0	0	0		2	1		0	0	0	0	0	0	0	0	0	0	0
3	1	2009	1	0	0	0	0	0	0	0	0	0	0	0		2	1		0	0	0	0	0	0	0	0	0	0	0
3	1	2009	1	0	0	0	0	0	0	0	0	0	0	0		2	1		0	0	0	0	0	0	0	0	0	0	0
3	1	2009	1	0	0	0	0	0	0	0	0	0	0	0		2	1		0	0	0	0	0	0	0	0	0	0	0
3	1	2009	1	0	0	0	0	0	0	0	0	0	0	0		2	1		0	0	0	0	0	0	0	0	0	0	0
3	1	2009	1	0	0	0	0	0	0	0	0	0	0	0		2	1		0	0	0	0	0	0	0	0	0	0	0
3	1	2009	1	0	0	0	0	0	0	0	0	0	0	0		2	1		0	0	0	0	0	0	0	0	0	0	0
3	1	2009	1	0	0	0	0	0	0	0	0	0	0	0		2	1		0	0	0	0	0	0	0	0	0	0	0
3	1	2009	1	0	0	0	0	0	0	0	0	0	0	0		2	1		0	0	0	0	0	0	0	0	0	0	0
3	1	2009	1	0	0	0	0	0	0	0	0	0	0	0		2	1		0	0	0	0	0	0	0	0	0	0	0
3	1	2009	1	0	0	0	0	0	0	0	0	0	0	0		2	1		0	0	0	0	0	0	0	0	0	0	0
3	1	2009	1	0	0	0	0	0	0	0	0	0	0	0		2	1		0	0	0	0	0	0	0	0	0	0	0
3	1	2009	1	0	0	0	0	0	0	0	0	0	0	0		2	1		0	0	0	0	0	0	0	0	0	0	0
3	1	2009	1	0	0	0	0	0	0	0	0	0	0	0		2	1		0	0	0	0	0	0	0	0	0	0	0
3	1	2009	1	0	0	0	0	0	0	0	0	0	0	0		2	1		0	0	0	0	0	0	0	0	0	0	0
3	1	2009	1	0	0	0	0	0	0	0	0	0	0	0		2	1		0	0	0	0	0	0	0	0	0	0	0
3	1	2009	1	0	0	0	0	0	0	0	0	0	0	0		2	1		0	0	0	0	0	0	0	0	0	0	0
3	1	2009	1	0	0	0	0	0	0	0	0	0	0	0		2	1		0	0	0	0	0	0	0	0	0	0	0
3	1	2009	1	0	0	0	0	0	0	0	0	0	0	0		2	1		0	0	0	0	0	0	0	0	0	0	0
3	1	2009	1	0	0	0	0	0	0	0	0	0	0	0		2	1		0	0	0	0	0	0	0	0	0	0	0
3	1	2009	1	0	0	0	0	0	0	0	0	0	0	0		2	1		0	0	0	0	0	0	0	0	0	0	0
3	1	2009	1	0	0	0	0	0	0	0	0	0	0	0		2	1		0	0	0	0	0	0	0	0	0	0	0
3	1	2009	1	0	0	0	0	0	0	0	0	0	0	0		2	1		0	0	0	0	0	0	0	0	0	0	0
3	1	2009	1	0	0	0	0	0	0	0	0	0	0	0		2	1		0	0	0	0	0	0	0	0	0	0	0
3	1	2009	1	0	0	0	0	0	0	0	0	0	0	0		2	1		0	0	0	0	0	0	0	0	0	0	0
3	1	2009	1	0	0	0	0	0	0	0	0	0	0	0		2	1		0	0	0	0	0	0	0	0	0	0	0
3	1	2009	1	0	0	0	0	0	0	0	0	0	0	0		2	1		0	0	0	0	0	0	0	0	0	0	0
3	1	2009	1	0	0	0	0	0	0	0	0	0	0	0		2	1		0	0	0	0	0	0	0	0	0	0	0
3	1	2009	1	0	0	0	0	0	0	0	0	0	0	0		2	1		0	0	0	0	0	0	0	0	0	0	0
3	1	2009	1	0	0	0	0	0	0	0	0	0	0	0		2	1		0	0	0	0	0	0	0	0	0	0	0
3	1	2009	1	0	0	0	0	0	0	0	0	0	0	0		2	1		0	0	0	0	0	0	0	0	0	0	0
3	1	2009	1	0	0	0	0	0	0	0	0	0	0	0		2	1		0	0	0	0	0	0	0	0	0	0	0
3	1	2009	1	0	0	0	0	0	0	0	0	0	0	0		2	1		0	0	0	0	0	0	0	0	0	0	0
3	1	2009	1	0	0	0	0	0	0	0	0	0	0	0		2	1		0	0	0	0	0	0	0	0	0	0	0
3	1	2009	1	0	0	0	0	0	0	0	0	0	0	0		2	1		0	0	0	0	0	0	0	0	0	0	0
3	1	2009	1	0	0	0	0	0	0	0	0	0	0	0		2	1		0	0	0	0	0	0	0	0	0	0	0
3	1	2009	1	0	0	0	0	0	0	0	0	0	0	0		2	1		0	0	0	0	0	0	0	0	0	0	0
3	1	2009	1	0	0	0	0	0	0	0	0	0	0	0		2	1		0	0	0	0	0	0	0	0	0	0	0
3	1	2009	1	0	0	0	0	0	0	0	0	0	0	0		2	1		0	0	0	0	0	0	0	0	0	0	0
3	1	2009	1	0	0	0	0	0	0	0	0	0	0	0		2	1		0	0	0	0	0	0	0	0	0	0	0
3	1	2009	1	0	0	0	0	0	0	0	0	0	0	0		2	1		0	0	0	0	0	0	0	0	0	0	0
3	1	2009	1	0	0	0	0	0	0	0	0	0	0	0		2	1		0	0	0	0	0	0	0	0	0	0	0
3	1	2009	1	0	0	0	0	0	0	0	0	0	0	0		2	1		0	0	0	0	0	0	0	0	0	0	0
3	1	2009	1	0	0	0	0	0	0	0	0	0	0	0		2	1		0	0	0	0	0	0	0	0	0	0	0
3	1	2009	1	0	0	0	0	0	0	0	0	0	0	0		2	1		0	0	0	0	0	0	0	0	0	0	0
3	1	2009	1	0	0	0	0	0	0	0	0	0	0	0		2	1		0	0	0	0	0	0	0	0	0	0	0
3	1	2009	1	0	0	0	0	0	0	0	0	0	0	0		2	1		0	0	0	0	0	0	0	0	0	0	0
3	1	2009	1	0	0	0	0	0	0	0	0	0	0	0		2	1		0	0	0	0	0	0	0	0	0	0	0
3	1	2009	1	0	0	0	0	0	0	0	0	0	0	0		1	1		0	0	0	0	0	0	0	0	0	0	0
3	1	2009	1	0	0	0	0	0	0	0	0	0	0	0		1	1		0	0	0	0	0	0	0	0	0	0	0
3	1	2009	1	0	0	0	0	0	0	0	0	0	0	0		1	1		0	0	0	0	0	0	0	0	0	0	0
3	1	2009	1	0	0	0	0	0	0	0	0	0	0	0		1	1		0	0	0	0	0	0	0	0	0	0	0
3	1	2009	1	0	0	0	0	0	0	0	0	0	0	0		1	1		0	0	0	0	0	0	0	0	0	0	0
3	1	2009	1	0	0	0	0	0	0	0	0	0	0	0		1	1		0	0	0	0	0	0	0	0	0	0	0
3	1	2009	1	0	0	0	0	0	0	0	0	0	0	0		1	1		0	0	0	0	0	0	0	0	0	0	0
3	1	2009	1	0	0	0	0	0	0	0	0	0	0	0		1	1		0	0	0	0	0	0	0	0	0	0	0
3	1	2009	1	0	0	0	0	0	0	0	0	0	0	0		1	1		0	0	0	0	0	0	0	0	0	0	0
3	1	2009	1	0	0	0	0	0	0	0	0	0	0	0		1	1		0	0	0	0	0	0	0	0	0	0	0
3	1	2009	1	0	0	0	0	0	0	0	0	0	0	0		1	1		0	0	0	0	0	0	0	0	0	0	0
3	1	2009	1	0	0	0	0	0	0	0	0	0	0	0		1	1		0	0	0	0	0	0	0	0	0	0	0
3	1	2009	1	0	0	0	0	0	0	0	0	0	0	0		1	1		0	0	0	0	0	0	0	0	0	0	0
3	1	2009	1	0	0	0	0	0	0	0	0	0	0	0		1	1		0	0	0	0	0	0	0	0	0	0	0
3	1	2009	1	0	0	0	0	0	0	0	0	0	0	0		1	1		0	0	0	0	0	0	0	0	0	0	0
3	1	2009	1	0	0	0	0	0	0	0	0	0	0	0		1	1		0	0	0	0	0	0	0	0	0	0	0
3	1	2009	1	0	0	0	0	0	0	0	0	0	0	0		1	1		0	0	0	0	0	0	0	0	0	0	0
3	1	2009	1	0	0	0	0	0	0	0	0	0	0	0		1	1		0	0	0	0	0	0	0	0	0	0	0
3	1	2009	1	0	0	0	0	0	0	0	0	0	0	0		1	1		0	0	0	0	0	0	0	0	0	0	0
3	1	2009	1	0	0	0	0	0	0	0	0	0	0	0		1	1		0	0	0	0	0	0	0	0	0	0	0
3	1	2009	1	0	0	0	0	0	0	0	0	0	0	0		1	1		0	0	0	0	0	0	0	0	0	0	0
3	1	2009	1	0	0	0	0	0	0	0	0	0	0	0		1	1		0	0	0	0	0	0	0	0	0	0	0
3	1	2009	1	0	0	0	0	0	0	0	0	0	0	0		1	1		0	0	0	0	0	0	0	0	0	0	0
3	1	2009	1	0	0	0	0	0	0	0	0	0	0	0		1	1		0	0	0	0	0	0	0	0	0	0	0
3	1	2009	1	0	0	0	0	0	0	0	0	0	0	0		1	1		0	0	0	0	0	0	0	0	0	0	0
3	1	2009	1	0	0	0	0	0	0	0	0	0	0	0		1	1		0	0	0	0	0	0	0	0	0	0	0
3	1	2009	1	0	0	0	0	0	0	0	0	0	0	0		1	1		0	0	0	0	0	0	0	0	0	0	0
3	1	2009	1	0	0	0	0	0	0	0	0	0	0	0		1	1		0	0	0	0	0	0	0	0	0	0	0
3	1	2009	1	0	0	0	0	0	0	0	0	0	0	0		1	1		0	0	0	0	0	0	0	0	0	0	0
3	1	2009	1	0	0	0	0	0	0	0	0	0	0	0		1	1		0	0	0	0	0	0	0	0	0	0	0
3	1	2009	1	0	0	0	0	0	0	0	0	0	0	0		1	1		0	0	0	0	0	0	0	0	0	0	0
3	1	2009	1	0	0	0	0	0	0	0	0	0	0	0		1	1		0	0	0	0	0	0	0	0	0	0	0
3	1	2009	1	0	0	0	0	0	0	0	0	0	0	0		1	1		0	0	0	0	0	0	0	0	0	0	0
3	1	2009	1	0	0	0	0	0	0	0	0	0	0	0		1	1		0	0	0	0	0	0	0	0	0	0	0
3	1	2009	1	0	0	0	0	0	0	0	0	0	0	0		1	1		0	0	0	0	0	0	0	0	0	0	0
3	1	2009	1	0	0	0	0	0	0	0	0	0	0	0		1	1		0	0	0	0	0	0	0	0	0	0	0
3	1	2009	1	0	0	0	0	0	0	0	0	0	0	0		1	1		0	0	0	0	0	0	0	0	0	0	0
3	1	2009	1	0	0	0	0	0	0	0	0	0	0	0		1	1		0	0	0	0	0	0	0	0	0	0	0
3	1	2009	1	0	0	0	0	0	0	0	0	0	0	0		1	1		0	0	0	0	0	0	0	0	0	0	0
3	1	2009	1	0	0	0	0	0	0	0	0	0	0	0		1	1		0	0	0	0	0	0	0	0	0	0	0
3	1	2009	1	0	0	0	0	0	0	0	0	0	0	0		1	1		0	0	0	0	0	0	0	0	0	0	0
3	1	2009	1	0	0	0	0	0	0	0	0	0	0	0		1	1		0	0	0	0	0	0	0	0	0	0	0
3	1	2009	1	0	0	0	0	0	0	0	0	0	0	0		1	1		0	0	0	0	0	0	0	0	0	0	0
3	1	2009	1	0	0	0	0	0	0	0	0	0	0	0		1	1		0	0	0	0	0	0	0	0	0	0	0
3	1	2009	1	0	0	0	0	0	0	0	0	0	0	0		1	1		0	0	0	0	0	0	0	0	0	0	0
3	1	2009	1	0	0	0	0	0	0	0	0	0	0	0		1	1		0	0	0	0	0	0	0	0	0	0	0
3	1	2009	1	0	0	0	0	0	0	0	0	0	0	0		1	1		0	0	0	0	0	0	0	0	0	0	0
3	1	2009	1	0	0	0	0	0	0	0	0	0	0	0		1	1		0	0	0	0	0	0	0	0	0	0	0
3	1	2009	1	0	0	0	0	0	0	0	0	0	0	0		1	1		0	0	0	0	0	0	0	0	0	0	0
3	1	2009	1	0	0	0	0	0	0	0	0	0	0	0		1	1		0	0	0	0	0	0	0	0	0	0	0
3	1	2009	1	0	0	0	0	0	0	0	0	0	0	0		1	1		0	0	0	0	0	0	0	0	0	0	0
3	1	2009	1	0	0	0	0	0	0	0	0	0	0	0		1	1		0	0	0	0	0	0	0	0	0	0	0
3	1	2009	1	0	0	0	0	0	0	0	0	0	0	0		1	1		0	0	0	0	0	0	0	0	0	0	0
3	1	2009	1	0	0	0	0	0	0	0	0	0	0	0		1	1		0	0	0	0	0	0	0	0	0	0	0
3	1	2009	1	0	0	0	0	0	0	0	0	0	0	0		1	1		0	0	0	0	0	0	0	0	0	0	0
3	1	2009	1	0	0	0	0	0	0	0	0	0	0	0		1	1		0	0	0	0	0	0	0	0	0	0	0
3	1	2009	1	0	0	0	0	0	0	0	0	0	0	0		1	1		0	0	0	0	0	0	0	0	0	0	0
3	1	2009	1	0	0	0	0	0	0	0	0	0	0	0		1	1		0	0	0	0	0	0	0	0	0	0	0
3	1	2009	1	0	0	0	0	0	0	0	0	0	0	0		1	1		0	0	0	0	0	0	0	0	0	0	0
3	1	2009	1	0	0	0	0	0	0	0	0	0	0	0		1	1		0	0	0	0	0	0	0	0	0	0	0
3	1	2009	1	0	0	0	0	0	0	0	0	0	0	0		1	1		0	0	0	0	0	0	0	0	0	0	0
3	1	2009	1	0	0	0	0	0	0	0	0	0	0	0		1	1		0	0	0	0	0	0	0	0	0	0	0
3	1	2009	1	0	0	0	0	0	0	0	0	0	0	0		1	1		0	0	0	0	0	0	0	0	0	0	0
3	2	2009	1	0	0	0	0	1	0	0	0	0	0	1	1	2	1		1	0	0	0	0	1	0	0	0	0	0	1					1
3	2	2009	1	0	0	0	0	0	1	0	0	0	0	1	1	2	1		1	0	0	0	0	0	1	0	0	0	0	1						1
3	2	2009	1	0	0	0	0	0	0	0	0	0	0	0		1	1		0	0	0	0	0	0	0	0	0	0	0
3	2	2009	1	0	0	0	0	0	0	0	0	0	0	0		1	1		0	0	0	0	0	0	0	0	0	0	0
3	2	2009	1	0	0	0	0	0	0	0	0	0	0	0		1	1		0	0	0	0	0	0	0	0	0	0	0
3	2	2009	1	0	0	0	0	0	0	0	0	0	0	0		1	1		0	0	0	0	0	0	0	0	0	0	0
3	2	2009	1	0	0	0	0	0	0	0	0	0	0	0		1	1		0	0	0	0	0	0	0	0	0	0	0
3	2	2009	1	0	0	0	0	0	0	0	0	0	0	0		1	1		0	0	0	0	0	0	0	0	0	0	0
3	2	2009	1	0	0	0	0	0	0	0	0	0	0	0		1	1		0	0	0	0	0	0	0	0	0	0	0
3	2	2009	1	0	0	0	0	0	0	0	0	0	0	0		1	1		0	0	0	0	0	0	0	0	0	0	0
3	2	2009	1	0	0	0	0	0	0	0	0	0	0	0		1	1		0	0	0	0	0	0	0	0	0	0	0
3	2	2009	1	0	0	0	0	0	0	0	0	0	0	0		1	1		0	0	0	0	0	0	0	0	0	0	0
3	2	2009	1	0	0	0	0	0	0	0	0	0	0	0		1	1		0	0	0	0	0	0	0	0	0	0	0
3	2	2009	1	0	0	0	0	0	0	0	0	0	0	0		1	1		0	0	0	0	0	0	0	0	0	0	0
3	2	2009	1	0	0	0	0	0	0	0	0	0	0	0		1	1		0	0	0	0	0	0	0	0	0	0	0
3	2	2009	1	0	0	0	0	0	0	0	0	0	0	0		1	1		0	0	0	0	0	0	0	0	0	0	0
3	2	2009	1	0	0	0	0	0	0	0	0	0	0	0		1	1		0	0	0	0	0	0	0	0	0	0	0
3	2	2009	1	0	0	0	0	0	0	0	0	0	0	0		1	1		0	0	0	0	0	0	0	0	0	0	0
3	2	2009	1	0	0	0	0	0	0	0	0	0	0	0		1	1		0	0	0	0	0	0	0	0	0	0	0
3	2	2009	1	0	0	0	0	0	0	0	0	0	0	0		1	1		0	0	0	0	0	0	0	0	0	0	0
3	2	2009	1	0	0	0	0	0	0	0	0	0	0	0		1	1		0	0	0	0	0	0	0	0	0	0	0
3	2	2009	1	0	0	0	0	0	0	0	0	0	0	0		1	1		0	0	0	0	0	0	0	0	0	0	0
3	2	2009	1	0	0	0	0	0	0	0	0	0	0	0		1	1		0	0	0	0	0	0	0	0	0	0	0
3	2	2009	1	0	0	0	0	0	0	0	0	0	0	0		2	1		0	0	0	0	0	0	0	0	0	0	0
3	2	2009	1	0	0	0	0	0	0	0	0	0	0	0		2	1		0	0	0	0	0	0	0	0	0	0	0
3	2	2009	1	0	0	0	0	0	0	0	0	0	0	0		2	1		0	0	0	0	0	0	0	0	0	0	0
3	2	2009	1	0	0	0	0	0	0	0	0	0	0	0		2	1		0	0	0	0	0	0	0	0	0	0	0
3	2	2009	1	0	0	0	0	0	0	0	0	0	0	0		2	1		0	0	0	0	0	0	0	0	0	0	0
3	3	2009	1	0	0	0	0	0	1	0	0	0	0	1	1	1	1		1	0	0	0	0	0	1	0	0	0	0	1						1
3	3	2009	1	0	1	0	0	0	0	0	0	0	0	1	1	1	1		1	0	1	0	0	0	0	0	0	0	0	1		1
3	3	2009	1	0	0	0	0	0	0	0	0	0	1	1	1	1	1		1	0	0	0	0	0	0	0	0	0	1	1										1
3	3	2009	1	0	0	0	0	0	1	0	0	0	0	1	1	1	1		1	0	0	0	0	0	1	0	0	0	0	1						1
3	3	2009	1	0	0	0	0	0	1	0	0	0	0	1	1	2	1		1	0	0	0	0	0	1	0	0	0	0	1						1
3	3	2009	1	0	0	0	0	0	0	0	0	0	1	1	1	1	1		1	0	0	0	0	0	0	0	0	0	1	1										1
3	3	2009	1	0	0	0	0	0	1	0	0	0	0	1	1	1	1		1	0	0	0	0	0	1	0	0	0	0	1						1
3	3	2009	1	0	0	0	0	0	1	0	0	0	0	1	1	1	1		1	0	0	0	0	0	1	0	0	0	0	1						1
3	3	2009	1	0	0	0	0	0	0	0	0	0	0	0		2	1		0	0	0	0	0	0	0	0	0	0	0
3	3	2009	1	0	0	0	0	0	0	0	0	0	0	0		2	1		0	0	0	0	0	0	0	0	0	0	0
3	3	2009	1	0	0	0	0	0	0	0	0	0	0	0		2	1		0	0	0	0	0	0	0	0	0	0	0
3	3	2009	1	0	0	0	0	0	0	0	0	0	0	0		2	1		0	0	0	0	0	0	0	0	0	0	0
3	3	2009	1	0	0	0	0	0	0	0	0	0	0	0		2	1		0	0	0	0	0	0	0	0	0	0	0
3	3	2009	1	0	0	0	0	0	0	0	0	0	0	0		2	1		0	0	0	0	0	0	0	0	0	0	0
3	3	2009	1	0	0	0	0	0	0	0	0	0	0	0		2	1		0	0	0	0	0	0	0	0	0	0	0
3	3	2009	1	0	0	0	0	0	0	0	0	0	0	0		2	1		0	0	0	0	0	0	0	0	0	0	0
3	3	2009	1	0	0	0	0	0	0	0	0	0	0	0		2	1		0	0	0	0	0	0	0	0	0	0	0
3	3	2009	1	0	0	0	0	0	0	0	0	0	0	0		2	1		0	0	0	0	0	0	0	0	0	0	0
3	3	2009	1	0	0	0	0	0	0	0	0	0	0	0		2	1		0	0	0	0	0	0	0	0	0	0	0
3	3	2009	1	0	0	0	0	0	0	0	0	0	0	0		2	1		0	0	0	0	0	0	0	0	0	0	0
3	3	2009	1	0	0	0	0	0	0	0	0	0	0	0		2	1		0	0	0	0	0	0	0	0	0	0	0
3	3	2009	1	0	0	0	0	0	0	0	0	0	0	0		2	1		0	0	0	0	0	0	0	0	0	0	0
3	3	2009	1	0	0	0	0	0	0	0	0	0	0	0		2	1		0	0	0	0	0	0	0	0	0	0	0
3	3	2009	1	0	0	0	0	0	0	0	0	0	0	0		2	1		0	0	0	0	0	0	0	0	0	0	0
3	3	2009	1	0	0	0	0	0	0	0	0	0	0	0		2	1		0	0	0	0	0	0	0	0	0	0	0
3	3	2009	1	0	0	0	0	0	0	0	0	0	0	0		2	1		0	0	0	0	0	0	0	0	0	0	0
3	3	2009	1	0	0	0	0	0	0	0	0	0	0	0		2	1		0	0	0	0	0	0	0	0	0	0	0
3	3	2009	1	0	0	0	0	0	0	0	0	0	0	0		2	1		0	0	0	0	0	0	0	0	0	0	0
3	3	2009	1	0	0	0	0	0	0	0	0	0	0	0		2	1		0	0	0	0	0	0	0	0	0	0	0
3	3	2009	1	0	0	0	0	0	0	0	0	0	0	0		2	1		0	0	0	0	0	0	0	0	0	0	0
3	3	2009	1	0	0	0	0	0	0	0	0	0	0	0		2	1		0	0	0	0	0	0	0	0	0	0	0
3	3	2009	1	0	0	0	0	0	0	0	0	0	0	0		2	1		0	0	0	0	0	0	0	0	0	0	0
3	3	2009	1	0	0	0	0	0	0	0	0	0	0	0		2	1		0	0	0	0	0	0	0	0	0	0	0
3	3	2009	1	0	0	0	0	0	0	0	0	0	0	0		2	1		0	0	0	0	0	0	0	0	0	0	0
3	3	2009	1	0	0	0	0	0	0	0	0	0	0	0		2	1		0	0	0	0	0	0	0	0	0	0	0
3	3	2009	1	0	0	0	0	0	0	0	0	0	0	0		1	1		0	0	0	0	0	0	0	0	0	0	0
3	3	2009	1	0	0	0	0	0	0	0	0	0	0	0		1	1		0	0	0	0	0	0	0	0	0	0	0
3	3	2009	1	0	0	0	0	0	0	0	0	0	0	0		1	1		0	0	0	0	0	0	0	0	0	0	0
3	3	2009	1	0	0	0	0	0	0	0	0	0	0	0		1	1		0	0	0	0	0	0	0	0	0	0	0
3	3	2009	1	0	0	0	0	0	0	0	0	0	0	0		1	1		0	0	0	0	0	0	0	0	0	0	0
3	3	2009	1	0	0	0	0	0	0	0	0	0	0	0		1	1		0	0	0	0	0	0	0	0	0	0	0
3	3	2009	1	0	0	0	0	0	0	0	0	0	0	0		1	1		0	0	0	0	0	0	0	0	0	0	0
3	3	2009	1	0	0	0	0	0	0	0	0	0	0	0		1	1		0	0	0	0	0	0	0	0	0	0	0
3	3	2009	1	0	0	0	0	0	0	0	0	0	0	0		1	1		0	0	0	0	0	0	0	0	0	0	0
3	3	2009	1	0	0	0	0	0	0	0	0	0	0	0		1	1		0	0	0	0	0	0	0	0	0	0	0
3	3	2009	1	0	0	0	0	0	0	0	0	0	0	0		1	1		0	0	0	0	0	0	0	0	0	0	0
3	3	2009	1	0	0	0	0	0	0	0	0	0	0	0		1	1		0	0	0	0	0	0	0	0	0	0	0
3	3	2009	1	0	0	0	0	0	0	0	0	0	0	0		1	1		0	0	0	0	0	0	0	0	0	0	0
3	3	2009	1	0	0	0	0	0	0	0	0	0	0	0		1	1		0	0	0	0	0	0	0	0	0	0	0
3	3	2009	1	0	0	0	0	0	0	0	0	0	0	0		1	1		0	0	0	0	0	0	0	0	0	0	0
3	3	2009	1	0	0	0	0	0	0	0	0	0	0	0		1	1		0	0	0	0	0	0	0	0	0	0	0
3	3	2009	1	0	0	0	0	0	0	0	0	0	0	0		1	1		0	0	0	0	0	0	0	0	0	0	0
3	3	2009	1	0	0	0	0	0	0	0	0	0	0	0		1	1		0	0	0	0	0	0	0	0	0	0	0
3	3	2009	1	0	0	0	0	0	0	0	0	0	0	0		1	1		0	0	0	0	0	0	0	0	0	0	0
3	3	2009	1	0	0	0	0	0	0	0	0	0	0	0		1	1		0	0	0	0	0	0	0	0	0	0	0
3	3	2009	1	0	0	0	0	0	0	0	0	0	0	0		1	1		0	0	0	0	0	0	0	0	0	0	0
3	3	2009	1	0	0	0	0	0	0	0	0	0	0	0		1	1		0	0	0	0	0	0	0	0	0	0	0
3	3	2009	1	0	0	0	0	0	0	0	0	0	0	0		1	1		0	0	0	0	0	0	0	0	0	0	0
3	3	2009	1	0	0	0	0	0	0	0	0	0	0	0		1	1		0	0	0	0	0	0	0	0	0	0	0
3	3	2009	1	0	0	0	0	0	0	0	0	0	0	0		1	1		0	0	0	0	0	0	0	0	0	0	0
3	3	2009	1	0	0	0	0	0	0	0	0	0	0	0		1	1		0	0	0	0	0	0	0	0	0	0	0
3	3	2009	1	0	0	0	0	0	0	0	0	0	0	0		1	1		0	0	0	0	0	0	0	0	0	0	0
3	3	2009	1	0	0	0	0	0	0	0	0	0	0	0		1	1		0	0	0	0	0	0	0	0	0	0	0
3	3	2009	1	0	0	0	0	0	0	0	0	0	0	0		1	1		0	0	0	0	0	0	0	0	0	0	0
3	3	2009	1	0	0	0	0	0	0	0	0	0	0	0		1	1		0	0	0	0	0	0	0	0	0	0	0
3	3	2009	1	0	0	0	0	0	0	0	0	0	0	0		1	1		0	0	0	0	0	0	0	0	0	0	0
3	3	2009	1	0	0	0	0	0	0	0	0	0	0	0		1	1		0	0	0	0	0	0	0	0	0	0	0
3	3	2009	1	0	0	0	0	0	0	0	0	0	0	0		1	1		0	0	0	0	0	0	0	0	0	0	0
3	3	2009	1	0	0	0	0	0	0	0	0	0	0	0		1	1		0	0	0	0	0	0	0	0	0	0	0
3	3	2009	1	0	0	0	0	0	0	0	0	0	0	0		1	1		0	0	0	0	0	0	0	0	0	0	0
3	3	2009	1	0	0	0	0	0	0	0	0	0	0	0		1	1		0	0	0	0	0	0	0	0	0	0	0
3	3	2009	1	0	0	0	0	0	0	0	0	0	0	0		1	1		0	0	0	0	0	0	0	0	0	0	0
3	3	2009	1	0	0	0	0	0	0	0	0	0	0	0		1	1		0	0	0	0	0	0	0	0	0	0	0
3	3	2009	1	0	0	0	0	0	0	0	0	0	0	0		1	1		0	0	0	0	0	0	0	0	0	0	0
3	3	2009	1	0	0	0	0	0	0	0	0	0	0	0		1	1		0	0	0	0	0	0	0	0	0	0	0
3	3	2009	1	0	0	0	0	0	0	0	0	0	0	0		1	1		0	0	0	0	0	0	0	0	0	0	0
3	3	2009	1	0	0	0	0	0	0	0	0	0	0	0		1	1		0	0	0	0	0	0	0	0	0	0	0
3	3	2009	1	0	0	0	0	0	0	0	0	0	0	0		1	1		0	0	0	0	0	0	0	0	0	0	0
3	3	2009	1	0	0	0	0	0	0	0	0	0	0	0		1	1		0	0	0	0	0	0	0	0	0	0	0
3	3	2009	1	0	0	0	0	0	0	0	0	0	0	0		1	1		0	0	0	0	0	0	0	0	0	0	0
3	3	2009	1	0	0	0	0	0	0	0	0	0	0	0		1	1		0	0	0	0	0	0	0	0	0	0	0
3	3	2009	1	0	0	0	0	0	0	0	0	0	0	0		1	1		0	0	0	0	0	0	0	0	0	0	0
3	3	2009	1	0	0	0	0	0	0	0	0	0	0	0		1	1		0	0	0	0	0	0	0	0	0	0	0
3	3	2009	1	0	0	0	0	0	0	0	0	0	0	0		1	1		0	0	0	0	0	0	0	0	0	0	0
3	3	2009	1	0	0	0	0	0	0	0	0	0	0	0		1	1		0	0	0	0	0	0	0	0	0	0	0
3	3	2009	1	0	0	0	0	0	0	0	0	0	0	0		1	1		0	0	0	0	0	0	0	0	0	0	0
3	3	2009	1	0	0	0	0	0	0	0	0	0	0	0		1	1		0	0	0	0	0	0	0	0	0	0	0
3	3	2009	1	0	0	0	0	0	0	0	0	0	0	0		1	1		0	0	0	0	0	0	0	0	0	0	0
3	3	2009	1	0	0	0	0	0	0	0	0	0	0	0		1	1		0	0	0	0	0	0	0	0	0	0	0
3	3	2009	1	0	0	0	0	0	0	0	0	0	0	0		1	1		0	0	0	0	0	0	0	0	0	0	0
3	3	2009	1	0	0	0	0	0	0	0	0	0	0	0		1	1		0	0	0	0	0	0	0	0	0	0	0
3	3	2009	1	0	0	0	0	0	0	0	0	0	0	0		1	1		0	0	0	0	0	0	0	0	0	0	0
3	3	2009	1	0	0	0	0	0	0	0	0	0	0	0		1	1		0	0	0	0	0	0	0	0	0	0	0
3	3	2009	1	0	0	0	0	0	0	0	0	0	0	0		1	1		0	0	0	0	0	0	0	0	0	0	0
3	3	2009	1	0	0	0	0	0	0	0	0	0	0	0		1	1		0	0	0	0	0	0	0	0	0	0	0
3	3	2009	1	0	0	0	0	0	0	0	0	0	0	0		1	1		0	0	0	0	0	0	0	0	0	0	0
3	3	2009	1	0	0	0	0	0	0	0	0	0	0	0		1	1		0	0	0	0	0	0	0	0	0	0	0
3	3	2009	1	0	0	0	0	0	0	0	0	0	0	0		1	1		0	0	0	0	0	0	0	0	0	0	0
3	3	2009	1	0	0	0	0	0	0	0	0	0	0	0		1	1		0	0	0	0	0	0	0	0	0	0	0
3	3	2009	1	0	0	0	0	0	0	0	0	0	0	0		1	1		0	0	0	0	0	0	0	0	0	0	0
3	3	2009	1	0	0	0	0	0	0	0	0	0	0	0		1	1		0	0	0	0	0	0	0	0	0	0	0
3	3	2009	1	0	0	0	0	0	0	0	0	0	0	0		1	1		0	0	0	0	0	0	0	0	0	0	0
3	3	2009	1	0	0	0	0	0	0	0	0	0	0	0		1	1		0	0	0	0	0	0	0	0	0	0	0
3	3	2009	1	0	0	0	0	0	0	0	0	0	0	0		1	1		0	0	0	0	0	0	0	0	0	0	0

## Sheet: JUV-AF-mixed
code	month	year	specie	A FL	A FF	A WS	A BG	A FT	A EA	A AT	A AM	A GS	A GSP	A all/M	SR count	sex	stage		PRESENCE	P FL	P FF	P WS	P BG	P FT	P EA	P AT	P AM	P GS	P GSP	INTENSITY	I FL	I FF	I WS	I BG	I FT	I EA	I AT	I AM	I GS	I GSP
3	1	2009	1	0	0	0	0	0	0	0	0	0	0	0		2	2		0	0	0	0	0	0	0	0	0	0	0
3	1	2009	1	0	0	0	0	0	0	0	0	0	0	0		2	2		0	0	0	0	0	0	0	0	0	0	0
3	1	2009	1	0	0	0	0	0	0	0	0	0	0	0		2	2		0	0	0	0	0	0	0	0	0	0	0
3	1	2009	1	0	0	0	0	0	0	0	0	0	0	0		2	2		0	0	0	0	0	0	0	0	0	0	0
3	1	2009	1	0	0	0	0	0	0	0	0	0	0	0		2	2		0	0	0	0	0	0	0	0	0	0	0
3	1	2009	1	0	0	0	0	0	0	0	0	0	0	0		2	2		0	0	0	0	0	0	0	0	0	0	0
3	1	2009	1	0	0	0	0	0	0	0	0	0	0	0		2	2		0	0	0	0	0	0	0	0	0	0	0
3	1	2009	1	0	0	0	0	0	0	0	0	0	0	0		2	2		0	0	0	0	0	0	0	0	0	0	0
3	1	2009	1	0	0	0	0	0	0	0	0	0	0	0		2	2		0	0	0	0	0	0	0	0	0	0	0
3	1	2009	1	0	0	0	0	0	0	0	0	0	0	0		2	2		0	0	0	0	0	0	0	0	0	0	0
3	1	2009	1	0	0	0	0	0	0	0	0	0	0	0		2	2		0	0	0	0	0	0	0	0	0	0	0
3	1	2009	1	0	0	0	0	0	0	0	0	0	0	0		2	2		0	0	0	0	0	0	0	0	0	0	0
3	1	2009	1	0	0	0	0	0	0	0	0	0	0	0		2	2		0	0	0	0	0	0	0	0	0	0	0
3	1	2009	1	0	0	0	0	0	0	0	0	0	0	0		2	2		0	0	0	0	0	0	0	0	0	0	0
3	1	2009	1	0	0	0	0	0	0	0	0	0	0	0		2	2		0	0	0	0	0	0	0	0	0	0	0
3	1	2009	1	0	0	0	0	0	0	0	0	0	0	0		2	2		0	0	0	0	0	0	0	0	0	0	0
3	1	2009	1	0	0	0	0	0	0	0	0	0	0	0		2	2		0	0	0	0	0	0	0	0	0	0	0
3	1	2009	1	0	0	0	0	0	0	0	0	0	0	0		2	2		0	0	0	0	0	0	0	0	0	0	0
3	1	2009	1	0	0	0	0	0	0	0	0	0	0	0		2	2		0	0	0	0	0	0	0	0	0	0	0
3	1	2009	1	0	0	0	0	0	0	0	0	0	0	0		2	2		0	0	0	0	0	0	0	0	0	0	0
3	1	2009	1	0	0	0	0	0	0	0	0	0	0	0		2	2		0	0	0	0	0	0	0	0	0	0	0
3	1	2009	1	0	0	0	0	0	0	0	0	0	0	0		2	2		0	0	0	0	0	0	0	0	0	0	0
3	1	2009	1	0	0	0	0	0	0	0	0	0	0	0		2	2		0	0	0	0	0	0	0	0	0	0	0
3	1	2009	1	0	0	0	0	0	0	0	0	0	0	0		2	2		0	0	0	0	0	0	0	0	0	0	0
3	1	2009	1	0	0	0	0	0	0	0	0	0	0	0		2	2		0	0	0	0	0	0	0	0	0	0	0
3	1	2009	1	0	0	0	0	0	0	0	0	0	0	0		2	2		0	0	0	0	0	0	0	0	0	0	0
3	1	2009	1	0	0	0	0	0	0	0	0	0	0	0		2	2		0	0	0	0	0	0	0	0	0	0	0
3	1	2009	1	0	0	0	0	0	0	0	0	0	0	0		2	2		0	0	0	0	0	0	0	0	0	0	0
3	1	2009	1	0	0	0	0	0	0	0	0	0	0	0		2	2		0	0	0	0	0	0	0	0	0	0	0
3	1	2009	1	0	0	0	0	0	0	0	0	0	0	0		2	2		0	0	0	0	0	0	0	0	0	0	0
3	1	2009	1	0	0	0	0	0	0	0	0	0	0	0		2	2		0	0	0	0	0	0	0	0	0	0	0
3	1	2009	1	0	0	0	0	0	0	0	0	0	0	0		2	2		0	0	0	0	0	0	0	0	0	0	0
3	1	2009	1	0	0	0	0	0	0	0	0	0	0	0		2	2		0	0	0	0	0	0	0	0	0	0	0
3	1	2009	1	0	0	0	0	0	0	0	0	0	0	0		2	2		0	0	0	0	0	0	0	0	0	0	0
3	1	2009	1	0	0	0	0	0	0	0	0	0	0	0		2	2		0	0	0	0	0	0	0	0	0	0	0
3	1	2009	1	0	0	0	0	0	0	0	0	0	0	0		1	2		0	0	0	0	0	0	0	0	0	0	0
3	1	2009	1	0	0	0	0	0	0	0	0	0	0	0		1	2		0	0	0	0	0	0	0	0	0	0	0
3	1	2009	1	0	0	0	0	0	0	0	0	0	0	0		1	2		0	0	0	0	0	0	0	0	0	0	0
3	1	2009	1	0	0	0	0	0	0	0	0	0	0	0		1	2		0	0	0	0	0	0	0	0	0	0	0
3	1	2009	1	0	0	0	0	0	0	0	0	0	0	0		1	2		0	0	0	0	0	0	0	0	0	0	0
3	1	2009	1	0	0	0	0	0	0	0	0	0	0	0		1	2		0	0	0	0	0	0	0	0	0	0	0
3	1	2009	1	0	0	0	0	0	0	0	0	0	0	0		1	2		0	0	0	0	0	0	0	0	0	0	0
3	1	2009	1	0	0	0	0	0	0	0	0	0	0	0		1	2		0	0	0	0	0	0	0	0	0	0	0
3	1	2009	1	0	0	0	0	0	0	0	0	0	0	0		1	2		0	0	0	0	0	0	0	0	0	0	0
3	1	2009	1	0	0	0	0	0	0	0	0	0	0	0		1	2		0	0	0	0	0	0	0	0	0	0	0
3	1	2009	1	0	0	0	0	0	0	0	0	0	0	0		1	2		0	0	0	0	0	0	0	0	0	0	0
3	1	2009	1	0	0	0	0	0	0	0	0	0	0	0		1	2		0	0	0	0	0	0	0	0	0	0	0
3	1	2009	1	0	0	0	0	0	0	0	0	0	0	0		1	2		0	0	0	0	0	0	0	0	0	0	0
3	1	2009	1	0	0	0	0	0	0	0	0	0	0	0		1	2		0	0	0	0	0	0	0	0	0	0	0
3	1	2009	1	0	0	0	0	0	0	0	0	0	0	0		1	2		0	0	0	0	0	0	0	0	0	0	0
3	1	2009	1	0	0	0	0	0	0	0	0	0	0	0		1	2		0	0	0	0	0	0	0	0	0	0	0
3	1	2009	1	0	0	0	0	0	0	0	0	0	0	0		1	2		0	0	0	0	0	0	0	0	0	0	0
3	1	2009	1	0	0	0	0	0	0	0	0	0	0	0		1	2		0	0	0	0	0	0	0	0	0	0	0
3	1	2009	1	0	0	0	0	0	0	0	0	0	0	0		1	2		0	0	0	0	0	0	0	0	0	0	0
3	1	2009	1	0	0	0	0	0	0	0	0	0	0	0		1	2		0	0	0	0	0	0	0	0	0	0	0
3	1	2009	1	0	0	0	0	0	0	0	0	0	0	0		1	2		0	0	0	0	0	0	0	0	0	0	0
3	1	2009	1	0	0	0	0	0	0	0	0	0	0	0		1	2		0	0	0	0	0	0	0	0	0	0	0
3	1	2009	1	0	0	0	0	0	0	0	0	0	0	0		1	2		0	0	0	0	0	0	0	0	0	0	0
3	1	2009	1	0	0	0	0	0	0	0	0	0	0	0		1	2		0	0	0	0	0	0	0	0	0	0	0
3	1	2009	1	0	0	0	0	0	0	0	0	0	0	0		1	2		0	0	0	0	0	0	0	0	0	0	0
3	1	2009	1	0	0	0	0	0	0	0	0	0	0	0		1	2		0	0	0	0	0	0	0	0	0	0	0
3	1	2009	1	0	0	0	0	0	0	0	0	0	0	0		1	2		0	0	0	0	0	0	0	0	0	0	0
3	1	2009	1	0	0	0	0	0	0	0	0	0	0	0		1	2		0	0	0	0	0	0	0	0	0	0	0
3	1	2009	1	0	0	0	0	0	0	0	0	0	0	0		1	2		0	0	0	0	0	0	0	0	0	0	0
3	1	2009	1	0	0	0	0	0	0	0	0	0	0	0		1	2		0	0	0	0	0	0	0	0	0	0	0
3	1	2009	1	0	0	0	0	0	0	0	0	0	0	0		1	2		0	0	0	0	0	0	0	0	0	0	0
3	1	2009	1	0	0	0	0	0	0	0	0	0	0	0		1	2		0	0	0	0	0	0	0	0	0	0	0
3	1	2009	1	0	0	0	0	0	0	0	0	0	0	0		1	2		0	0	0	0	0	0	0	0	0	0	0
3	1	2009	1	0	0	0	0	0	0	0	0	0	0	0		1	2		0	0	0	0	0	0	0	0	0	0	0
3	1	2009	1	0	0	0	0	0	0	0	0	0	0	0		1	2		0	0	0	0	0	0	0	0	0	0	0
3	1	2009	1	0	0	0	0	0	0	0	0	0	0	0		1	2		0	0	0	0	0	0	0	0	0	0	0
3	1	2009	1	0	0	0	0	0	0	0	0	0	0	0		1	2		0	0	0	0	0	0	0	0	0	0	0
3	1	2009	1	0	0	0	0	0	0	0	0	0	0	0		1	2		0	0	0	0	0	0	0	0	0	0	0
3	1	2009	1	0	0	0	0	0	0	0	0	0	0	0		1	2		0	0	0	0	0	0	0	0	0	0	0
3	1	2009	1	0	0	0	0	0	0	0	0	0	0	0		1	2		0	0	0	0	0	0	0	0	0	0	0
3	1	2009	1	0	0	0	0	0	0	0	0	0	0	0		1	2		0	0	0	0	0	0	0	0	0	0	0
3	1	2009	1	0	0	0	0	0	0	0	0	0	0	0		1	2		0	0	0	0	0	0	0	0	0	0	0
3	1	2009	1	0	0	0	0	0	0	0	0	0	0	0		1	2		0	0	0	0	0	0	0	0	0	0	0
3	1	2009	1	0	0	0	0	0	0	0	0	0	0	0		1	2		0	0	0	0	0	0	0	0	0	0	0
3	1	2009	1	0	0	0	0	0	0	0	0	0	0	0		1	2		0	0	0	0	0	0	0	0	0	0	0
3	1	2009	1	0	0	0	0	0	0	0	0	0	0	0		1	2		0	0	0	0	0	0	0	0	0	0	0
3	1	2009	1	0	0	0	0	0	0	0	0	0	0	0		1	2		0	0	0	0	0	0	0	0	0	0	0
3	1	2009	1	0	0	0	0	0	0	0	0	0	0	0		1	2		0	0	0	0	0	0	0	0	0	0	0
3	1	2009	1	0	0	0	0	0	0	0	0	0	0	0		1	2		0	0	0	0	0	0	0	0	0	0	0
3	1	2009	1	0	0	0	0	0	0	0	0	0	0	0		1	2		0	0	0	0	0	0	0	0	0	0	0
3	1	2009	1	0	0	0	0	0	0	0	0	0	0	0		1	2		0	0	0	0	0	0	0	0	0	0	0
3	1	2009	1	0	0	0	0	0	0	0	0	0	0	0		1	2		0	0	0	0	0	0	0	0	0	0	0
3	1	2009	1	0	0	0	0	0	0	0	0	0	0	0		1	2		0	0	0	0	0	0	0	0	0	0	0
3	1	2009	1	0	0	0	0	0	0	0	0	0	0	0		1	2		0	0	0	0	0	0	0	0	0	0	0
3	1	2009	1	0	0	0	0	0	0	0	0	0	0	0		1	2		0	0	0	0	0	0	0	0	0	0	0
3	1	2009	1	0	0	0	0	0	0	0	0	0	0	0		1	2		0	0	0	0	0	0	0	0	0	0	0
3	1	2009	1	0	0	0	0	0	0	0	0	0	0	0		1	2		0	0	0	0	0	0	0	0	0	0	0
3	1	2009	1	0	0	0	0	0	0	0	0	0	0	0		1	2		0	0	0	0	0	0	0	0	0	0	0
3	1	2009	1	0	0	0	0	0	0	0	0	0	0	0		1	2		0	0	0	0	0	0	0	0	0	0	0
3	1	2009	1	0	0	0	0	0	0	0	0	0	0	0		1	2		0	0	0	0	0	0	0	0	0	0	0
3	1	2009	1	0	0	0	0	0	0	0	0	0	0	0		1	2		0	0	0	0	0	0	0	0	0	0	0
3	1	2009	1	0	0	0	0	0	0	0	0	0	0	0		1	2		0	0	0	0	0	0	0	0	0	0	0
3	1	2009	1	0	0	0	0	0	0	0	0	0	0	0		1	2		0	0	0	0	0	0	0	0	0	0	0
3	1	2009	1	0	0	0	0	0	0	0	0	0	0	0		1	2		0	0	0	0	0	0	0	0	0	0	0
3	1	2009	1	0	0	0	0	0	0	0	0	0	0	0		1	2		0	0	0	0	0	0	0	0	0	0	0
3	1	2009	1	0	0	0	0	0	0	0	0	0	0	0		1	2		0	0	0	0	0	0	0	0	0	0	0
3	1	2009	1	0	0	0	0	0	0	0	0	0	0	0		1	2		0	0	0	0	0	0	0	0	0	0	0
3	1	2009	1	0	0	0	0	0	0	0	0	0	0	0		1	2		0	0	0	0	0	0	0	0	0	0	0
3	1	2009	1	0	0	0	0	0	0	0	0	0	0	0		1	2		0	0	0	0	0	0	0	0	0	0	0
3	1	2009	1	0	0	0	0	0	0	0	0	0	0	0		1	2		0	0	0	0	0	0	0	0	0	0	0
3	1	2009	1	0	0	0	0	0	0	0	0	0	0	0		1	2		0	0	0	0	0	0	0	0	0	0	0
3	1	2009	1	0	0	0	0	0	0	0	0	0	0	0		1	2		0	0	0	0	0	0	0	0	0	0	0
3	1	2009	1	0	0	0	0	0	0	0	0	0	0	0		1	2		0	0	0	0	0	0	0	0	0	0	0
3	1	2009	1	0	0	0	0	0	0	0	0	0	0	0		1	2		0	0	0	0	0	0	0	0	0	0	0
3	1	2009	1	0	0	0	0	0	0	0	0	0	0	0		1	2		0	0	0	0	0	0	0	0	0	0	0
3	1	2009	1	0	0	0	0	0	0	0	0	0	0	0		1	2		0	0	0	0	0	0	0	0	0	0	0
3	1	2009	1	0	0	0	0	0	0	0	0	0	0	0		1	2		0	0	0	0	0	0	0	0	0	0	0
3	1	2009	1	0	0	0	0	0	0	0	0	0	0	0		1	2		0	0	0	0	0	0	0	0	0	0	0
3	1	2009	1	0	0	0	0	0	0	0	0	0	0	0		1	2		0	0	0	0	0	0	0	0	0	0	0
3	1	2009	1	0	0	0	0	0	0	0	0	0	0	0		1	2		0	0	0	0	0	0	0	0	0	0	0
3	1	2009	1	0	0	0	0	0	0	0	0	0	0	0		1	2		0	0	0	0	0	0	0	0	0	0	0
3	1	2009	1	0	0	0	0	0	0	0	0	0	0	0		1	2		0	0	0	0	0	0	0	0	0	0	0
3	1	2009	1	0	0	0	0	0	0	0	0	0	0	0		1	2		0	0	0	0	0	0	0	0	0	0	0
3	1	2009	1	0	0	0	0	0	0	0	0	0	0	0		1	2		0	0	0	0	0	0	0	0	0	0	0
3	1	2009	1	0	0	0	0	0	0	0	0	0	0	0		1	2		0	0	0	0	0	0	0	0	0	0	0
3	1	2009	1	0	0	0	0	0	0	0	0	0	0	0		1	2		0	0	0	0	0	0	0	0	0	0	0
3	1	2009	1	0	0	0	0	0	0	0	0	0	0	0		1	2		0	0	0	0	0	0	0	0	0	0	0
3	1	2009	1	0	0	0	0	0	0	0	0	0	0	0		1	2		0	0	0	0	0	0	0	0	0	0	0
3	1	2009	1	0	0	0	0	0	0	0	0	0	0	0		1	2		0	0	0	0	0	0	0	0	0	0	0
3	1	2009	1	0	0	0	0	0	0	0	0	0	0	0		1	2		0	0	0	0	0	0	0	0	0	0	0
3	1	2009	1	0	0	0	0	0	0	0	0	0	0	0		1	2		0	0	0	0	0	0	0	0	0	0	0
3	1	2009	1	0	0	0	0	0	0	0	0	0	0	0		1	2		0	0	0	0	0	0	0	0	0	0	0
3	1	2009	1	0	0	0	0	0	0	0	0	0	0	0		1	2		0	0	0	0	0	0	0	0	0	0	0
3	1	2009	1	0	0	0	0	0	0	0	0	0	0	0		1	2		0	0	0	0	0	0	0	0	0	0	0
3	1	2009	1	0	0	0	0	0	0	0	0	0	0	0		1	2		0	0	0	0	0	0	0	0	0	0	0
3	1	2009	1	0	0	0	0	0	0	0	0	0	0	0		1	2		0	0	0	0	0	0	0	0	0	0	0
3	1	2009	1	0	0	0	0	0	0	0	0	0	0	0		1	2		0	0	0	0	0	0	0	0	0	0	0
3	1	2009	1	0	0	0	0	0	0	0	0	0	0	0		1	2		0	0	0	0	0	0	0	0	0	0	0
3	1	2009	1	0	0	0	0	0	0	0	0	0	0	0		1	2		0	0	0	0	0	0	0	0	0	0	0
3	2	2009	1	1	1	0	0	0	0	0	0	0	0	2	2	1	2		1	1	1	0	0	0	0	0	0	0	0	2	1	1
3	2	2009	1	1	0	0	0	0	0	0	0	0	0	1	1	2	2		1	1	0	0	0	0	0	0	0	0	0	1	1
3	2	2009	1	1	1	0	0	0	0	0	0	0	0	2	2	2	2		1	1	1	0	0	0	0	0	0	0	0	2	1	1
3	2	2009	1	1	0	0	0	0	0	0	0	0	0	1	1	1	2		1	1	0	0	0	0	0	0	0	0	0	1	1
3	2	2009	1	1	0	0	0	0	0	0	0	0	0	1	1	1	2		1	1	0	0	0	0	0	0	0	0	0	1	1
3	2	2009	1	1	1	0	0	0	0	0	0	0	0	2	2	1	2		1	1	1	0	0	0	0	0	0	0	0	2	1	1
3	2	2009	1	1	0	0	0	0	0	0	0	0	0	1	1	1	2		1	1	0	0	0	0	0	0	0	0	0	1	1
3	2	2009	1	1	0	0	0	0	0	0	0	0	0	1	1	1	2		1	1	0	0	0	0	0	0	0	0	0	1	1
3	2	2009	1	1	0	0	0	0	0	0	0	0	0	1	1	1	2		1	1	0	0	0	0	0	0	0	0	0	1	1
3	2	2009	1	0	0	0	0	0	0	0	0	0	1	1	1	2	2		1	0	0	0	0	0	0	0	0	0	1	1										1
3	2	2009	1	0	0	0	0	0	0	0	0	0	0	0		1	2		0	0	0	0	0	0	0	0	0	0	0
3	2	2009	1	0	0	0	0	0	0	0	0	0	0	0		1	2		0	0	0	0	0	0	0	0	0	0	0
3	2	2009	1	0	0	0	0	0	0	0	0	0	0	0		1	2		0	0	0	0	0	0	0	0	0	0	0
3	2	2009	1	0	0	0	0	0	0	0	0	0	0	0		1	2		0	0	0	0	0	0	0	0	0	0	0
3	2	2009	1	0	0	0	0	0	0	0	0	0	0	0		1	2		0	0	0	0	0	0	0	0	0	0	0
3	2	2009	1	0	0	0	0	0	0	0	0	0	0	0		1	2		0	0	0	0	0	0	0	0	0	0	0
3	2	2009	1	0	0	0	0	0	0	0	0	0	0	0		1	2		0	0	0	0	0	0	0	0	0	0	0
3	2	2009	1	0	0	0	0	0	0	0	0	0	0	0		1	2		0	0	0	0	0	0	0	0	0	0	0
3	2	2009	1	0	0	0	0	0	0	0	0	0	0	0		1	2		0	0	0	0	0	0	0	0	0	0	0
3	2	2009	1	0	0	0	0	0	0	0	0	0	0	0		1	2		0	0	0	0	0	0	0	0	0	0	0
3	2	2009	1	0	0	0	0	0	0	0	0	0	0	0		1	2		0	0	0	0	0	0	0	0	0	0	0
3	2	2009	1	0	0	0	0	0	0	0	0	0	0	0		1	2		0	0	0	0	0	0	0	0	0	0	0
3	2	2009	1	0	0	0	0	0	0	0	0	0	0	0		1	2		0	0	0	0	0	0	0	0	0	0	0
3	2	2009	1	0	0	0	0	0	0	0	0	0	0	0		1	2		0	0	0	0	0	0	0	0	0	0	0
3	2	2009	1	0	0	0	0	0	0	0	0	0	0	0		1	2		0	0	0	0	0	0	0	0	0	0	0
3	2	2009	1	0	0	0	0	0	0	0	0	0	0	0		1	2		0	0	0	0	0	0	0	0	0	0	0
3	2	2009	1	0	0	0	0	0	0	0	0	0	0	0		1	2		0	0	0	0	0	0	0	0	0	0	0
3	2	2009	1	0	0	0	0	0	0	0	0	0	0	0		1	2		0	0	0	0	0	0	0	0	0	0	0
3	2	2009	1	0	0	0	0	0	0	0	0	0	0	0		1	2		0	0	0	0	0	0	0	0	0	0	0
3	2	2009	1	0	0	0	0	0	0	0	0	0	0	0		1	2		0	0	0	0	0	0	0	0	0	0	0
3	2	2009	1	0	0	0	0	0	0	0	0	0	0	0		1	2		0	0	0	0	0	0	0	0	0	0	0
3	2	2009	1	0	0	0	0	0	0	0	0	0	0	0		1	2		0	0	0	0	0	0	0	0	0	0	0
3	2	2009	1	0	0	0	0	0	0	0	0	0	0	0		1	2		0	0	0	0	0	0	0	0	0	0	0
3	2	2009	1	0	0	0	0	0	0	0	0	0	0	0		1	2		0	0	0	0	0	0	0	0	0	0	0
3	2	2009	1	0	0	0	0	0	0	0	0	0	0	0		1	2		0	0	0	0	0	0	0	0	0	0	0
3	2	2009	1	0	0	0	0	0	0	0	0	0	0	0		1	2		0	0	0	0	0	0	0	0	0	0	0
3	2	2009	1	0	0	0	0	0	0	0	0	0	0	0		1	2		0	0	0	0	0	0	0	0	0	0	0
3	2	2009	1	0	0	0	0	0	0	0	0	0	0	0		1	2		0	0	0	0	0	0	0	0	0	0	0
3	2	2009	1	0	0	0	0	0	0	0	0	0	0	0		1	2		0	0	0	0	0	0	0	0	0	0	0
3	2	2009	1	0	0	0	0	0	0	0	0	0	0	0		1	2		0	0	0	0	0	0	0	0	0	0	0
3	2	2009	1	0	0	0	0	0	0	0	0	0	0	0		1	2		0	0	0	0	0	0	0	0	0	0	0
3	2	2009	1	0	0	0	0	0	0	0	0	0	0	0		1	2		0	0	0	0	0	0	0	0	0	0	0
3	2	2009	1	0	0	0	0	0	0	0	0	0	0	0		1	2		0	0	0	0	0	0	0	0	0	0	0
3	2	2009	1	0	0	0	0	0	0	0	0	0	0	0		1	2		0	0	0	0	0	0	0	0	0	0	0
3	2	2009	1	0	0	0	0	0	0	0	0	0	0	0		1	2		0	0	0	0	0	0	0	0	0	0	0
3	2	2009	1	0	0	0	0	0	0	0	0	0	0	0		1	2		0	0	0	0	0	0	0	0	0	0	0
3	2	2009	1	0	0	0	0	0	0	0	0	0	0	0		1	2		0	0	0	0	0	0	0	0	0	0	0
3	2	2009	1	0	0	0	0	0	0	0	0	0	0	0		1	2		0	0	0	0	0	0	0	0	0	0	0
3	2	2009	1	0	0	0	0	0	0	0	0	0	0	0		1	2		0	0	0	0	0	0	0	0	0	0	0
3	2	2009	1	0	0	0	0	0	0	0	0	0	0	0		1	2		0	0	0	0	0	0	0	0	0	0	0
3	2	2009	1	0	0	0	0	0	0	0	0	0	0	0		1	2		0	0	0	0	0	0	0	0	0	0	0
3	2	2009	1	0	0	0	0	0	0	0	0	0	0	0		1	2		0	0	0	0	0	0	0	0	0	0	0
3	2	2009	1	0	0	0	0	0	0	0	0	0	0	0		1	2		0	0	0	0	0	0	0	0	0	0	0
3	2	2009	1	0	0	0	0	0	0	0	0	0	0	0		1	2		0	0	0	0	0	0	0	0	0	0	0
3	2	2009	1	0	0	0	0	0	0	0	0	0	0	0		1	2		0	0	0	0	0	0	0	0	0	0	0
3	2	2009	1	0	0	0	0	0	0	0	0	0	0	0		1	2		0	0	0	0	0	0	0	0	0	0	0
3	2	2009	1	0	0	0	0	0	0	0	0	0	0	0		1	2		0	0	0	0	0	0	0	0	0	0	0
3	2	2009	1	0	0	0	0	0	0	0	0	0	0	0		1	2		0	0	0	0	0	0	0	0	0	0	0
3	2	2009	1	0	0	0	0	0	0	0	0	0	0	0		1	2		0	0	0	0	0	0	0	0	0	0	0
3	2	2009	1	0	0	0	0	0	0	0	0	0	0	0		1	2		0	0	0	0	0	0	0	0	0	0	0
3	2	2009	1	0	0	0	0	0	0	0	0	0	0	0		1	2		0	0	0	0	0	0	0	0	0	0	0
3	2	2009	1	0	0	0	0	0	0	0	0	0	0	0		1	2		0	0	0	0	0	0	0	0	0	0	0
3	2	2009	1	0	0	0	0	0	0	0	0	0	0	0		1	2		0	0	0	0	0	0	0	0	0	0	0
3	2	2009	1	0	0	0	0	0	0	0	0	0	0	0		1	2		0	0	0	0	0	0	0	0	0	0	0
3	2	2009	1	0	0	0	0	0	0	0	0	0	0	0		1	2		0	0	0	0	0	0	0	0	0	0	0
3	2	2009	1	0	0	0	0	0	0	0	0	0	0	0		1	2		0	0	0	0	0	0	0	0	0	0	0
3	2	2009	1	0	0	0	0	0	0	0	0	0	0	0		1	2		0	0	0	0	0	0	0	0	0	0	0
3	2	2009	1	0	0	0	0	0	0	0	0	0	0	0		1	2		0	0	0	0	0	0	0	0	0	0	0
3	2	2009	1	0	0	0	0	0	0	0	0	0	0	0		1	2		0	0	0	0	0	0	0	0	0	0	0
3	2	2009	1	0	0	0	0	0	0	0	0	0	0	0		1	2		0	0	0	0	0	0	0	0	0	0	0
3	2	2009	1	0	0	0	0	0	0	0	0	0	0	0		1	2		0	0	0	0	0	0	0	0	0	0	0
3	2	2009	1	0	0	0	0	0	0	0	0	0	0	0		1	2		0	0	0	0	0	0	0	0	0	0	0
3	2	2009	1	0	0	0	0	0	0	0	0	0	0	0		1	2		0	0	0	0	0	0	0	0	0	0	0
3	2	2009	1	0	0	0	0	0	0	0	0	0	0	0		1	2		0	0	0	0	0	0	0	0	0	0	0
3	2	2009	1	0	0	0	0	0	0	0	0	0	0	0		1	2		0	0	0	0	0	0	0	0	0	0	0
3	2	2009	1	0	0	0	0	0	0	0	0	0	0	0		1	2		0	0	0	0	0	0	0	0	0	0	0
3	2	2009	1	0	0	0	0	0	0	0	0	0	0	0		1	2		0	0	0	0	0	0	0	0	0	0	0
3	2	2009	1	0	0	0	0	0	0	0	0	0	0	0		1	2		0	0	0	0	0	0	0	0	0	0	0
3	2	2009	1	0	0	0	0	0	0	0	0	0	0	0		2	2		0	0	0	0	0	0	0	0	0	0	0
3	2	2009	1	0	0	0	0	0	0	0	0	0	0	0		2	2		0	0	0	0	0	0	0	0	0	0	0
3	2	2009	1	0	0	0	0	0	0	0	0	0	0	0		2	2		0	0	0	0	0	0	0	0	0	0	0
3	2	2009	1	0	0	0	0	0	0	0	0	0	0	0		2	2		0	0	0	0	0	0	0	0	0	0	0
3	2	2009	1	0	0	0	0	0	0	0	0	0	0	0		2	2		0	0	0	0	0	0	0	0	0	0	0
3	2	2009	1	0	0	0	0	0	0	0	0	0	0	0		2	2		0	0	0	0	0	0	0	0	0	0	0
3	2	2009	1	0	0	0	0	0	0	0	0	0	0	0		2	2		0	0	0	0	0	0	0	0	0	0	0
3	2	2009	1	0	0	0	0	0	0	0	0	0	0	0		2	2		0	0	0	0	0	0	0	0	0	0	0
3	2	2009	1	0	0	0	0	0	0	0	0	0	0	0		2	2		0	0	0	0	0	0	0	0	0	0	0
3	2	2009	1	0	0	0	0	0	0	0	0	0	0	0		2	2		0	0	0	0	0	0	0	0	0	0	0
3	2	2009	1	0	0	0	0	0	0	0	0	0	0	0		2	2		0	0	0	0	0	0	0	0	0	0	0
3	2	2009	1	0	0	0	0	0	0	0	0	0	0	0		2	2		0	0	0	0	0	0	0	0	0	0	0
3	2	2009	1	0	0	0	0	0	0	0	0	0	0	0		2	2		0	0	0	0	0	0	0	0	0	0	0
3	2	2009	1	0	0	0	0	0	0	0	0	0	0	0		2	2		0	0	0	0	0	0	0	0	0	0	0
3	2	2009	1	0	0	0	0	0	0	0	0	0	0	0		2	2		0	0	0	0	0	0	0	0	0	0	0
3	2	2009	1	0	0	0	0	0	0	0	0	0	0	0		2	2		0	0	0	0	0	0	0	0	0	0	0
3	2	2009	1	0	0	0	0	0	0	0	0	0	0	0		2	2		0	0	0	0	0	0	0	0	0	0	0
3	2	2009	1	0	0	0	0	0	0	0	0	0	0	0		2	2		0	0	0	0	0	0	0	0	0	0	0
3	2	2009	1	0	0	0	0	0	0	0	0	0	0	0		2	2		0	0	0	0	0	0	0	0	0	0	0
3	2	2009	1	0	0	0	0	0	0	0	0	0	0	0		2	2		0	0	0	0	0	0	0	0	0	0	0
3	2	2009	1	0	0	0	0	0	0	0	0	0	0	0		2	2		0	0	0	0	0	0	0	0	0	0	0
3	2	2009	1	0	0	0	0	0	0	0	0	0	0	0		2	2		0	0	0	0	0	0	0	0	0	0	0
3	2	2009	1	0	0	0	0	0	0	0	0	0	0	0		2	2		0	0	0	0	0	0	0	0	0	0	0
3	2	2009	1	0	0	0	0	0	0	0	0	0	0	0		2	2		0	0	0	0	0	0	0	0	0	0	0
3	2	2009	1	0	0	0	0	0	0	0	0	0	0	0		2	2		0	0	0	0	0	0	0	0	0	0	0
3	2	2009	1	0	0	0	0	0	0	0	0	0	0	0		2	2		0	0	0	0	0	0	0	0	0	0	0
3	2	2009	1	0	0	0	0	0	0	0	0	0	0	0		2	2		0	0	0	0	0	0	0	0	0	0	0
3	2	2009	1	0	0	0	0	0	0	0	0	0	0	0		2	2		0	0	0	0	0	0	0	0	0	0	0
3	2	2009	1	0	0	0	0	0	0	0	0	0	0	0		2	2		0	0	0	0	0	0	0	0	0	0	0
3	2	2009	1	0	0	0	0	0	0	0	0	0	0	0		2	2		0	0	0	0	0	0	0	0	0	0	0
3	2	2009	1	0	0	0	0	0	0	0	0	0	0	0		2	2		0	0	0	0	0	0	0	0	0	0	0
3	2	2009	1	0	0	0	0	0	0	0	0	0	0	0		2	2		0	0	0	0	0	0	0	0	0	0	0
3	2	2009	1	0	0	0	0	0	0	0	0	0	0	0		2	2		0	0	0	0	0	0	0	0	0	0	0
3	2	2009	1	0	0	0	0	0	0	0	0	0	0	0		2	2		0	0	0	0	0	0	0	0	0	0	0
3	2	2009	1	0	0	0	0	0	0	0	0	0	0	0		2	2		0	0	0	0	0	0	0	0	0	0	0
3	2	2009	1	0	0	0	0	0	0	0	0	0	0	0		2	2		0	0	0	0	0	0	0	0	0	0	0
3	2	2009	1	0	0	0	0	0	0	0	0	0	0	0		2	2		0	0	0	0	0	0	0	0	0	0	0
3	2	2009	1	0	0	0	0	0	0	0	0	0	0	0		2	2		0	0	0	0	0	0	0	0	0	0	0
3	2	2009	1	0	0	0	0	0	0	0	0	0	0	0		2	2		0	0	0	0	0	0	0	0	0	0	0
3	2	2009	1	0	0	0	0	0	0	0	0	0	0	0		2	2		0	0	0	0	0	0	0	0	0	0	0
3	2	2009	1	0	0	0	0	0	0	0	0	0	0	0		2	2		0	0	0	0	0	0	0	0	0	0	0
3	2	2009	1	0	0	0	0	0	0	0	0	0	0	0		2	2		0	0	0	0	0	0	0	0	0	0	0
3	2	2009	1	0	0	0	0	0	0	0	0	0	0	0		2	2		0	0	0	0	0	0	0	0	0	0	0
3	2	2009	1	0	0	0	0	0	0	0	0	0	0	0		2	2		0	0	0	0	0	0	0	0	0	0	0
3	2	2009	1	0	0	0	0	0	0	0	0	0	0	0		2	2		0	0	0	0	0	0	0	0	0	0	0
3	2	2009	1	0	0	0	0	0	0	0	0	0	0	0		2	2		0	0	0	0	0	0	0	0	0	0	0
3	2	2009	1	0	0	0	0	0	0	0	0	0	0	0		2	2		0	0	0	0	0	0	0	0	0	0	0
3	2	2009	1	0	0	0	0	0	0	0	0	0	0	0		2	2		0	0	0	0	0	0	0	0	0	0	0
3	2	2009	1	0	0	0	0	0	0	0	0	0	0	0		2	2		0	0	0	0	0	0	0	0	0	0	0
3	2	2009	1	0	0	0	0	0	0	0	0	0	0	0		2	2		0	0	0	0	0	0	0	0	0	0	0
3	2	2009	1	0	0	0	0	0	0	0	0	0	0	0		2	2		0	0	0	0	0	0	0	0	0	0	0
3	2	2009	1	0	0	0	0	0	0	0	0	0	0	0		2	2		0	0	0	0	0	0	0	0	0	0	0
3	2	2009	1	0	0	0	0	0	0	0	0	0	0	0		2	2		0	0	0	0	0	0	0	0	0	0	0
3	2	2009	1	0	0	0	0	0	0	0	0	0	0	0		2	2		0	0	0	0	0	0	0	0	0	0	0
3	2	2009	1	0	0	0	0	0	0	0	0	0	0	0		2	2		0	0	0	0	0	0	0	0	0	0	0
3	2	2009	1	0	0	0	0	0	0	0	0	0	0	0		2	2		0	0	0	0	0	0	0	0	0	0	0
3	2	2009	1	0	0	0	0	0	0	0	0	0	0	0		2	2		0	0	0	0	0	0	0	0	0	0	0
3	2	2009	1	0	0	0	0	0	0	0	0	0	0	0		2	2		0	0	0	0	0	0	0	0	0	0	0
3	2	2009	1	0	0	0	0	0	0	0	0	0	0	0		2	2		0	0	0	0	0	0	0	0	0	0	0
3	2	2009	1	0	0	0	0	0	0	0	0	0	0	0		2	2		0	0	0	0	0	0	0	0	0	0	0
3	2	2009	1	0	0	0	0	0	0	0	0	0	0	0		2	2		0	0	0	0	0	0	0	0	0	0	0
3	2	2009	1	0	0	0	0	0	0	0	0	0	0	0		2	2		0	0	0	0	0	0	0	0	0	0	0
3	2	2009	1	0	0	0	0	0	0	0	0	0	0	0		2	2		0	0	0	0	0	0	0	0	0	0	0
3	2	2009	1	0	0	0	0	0	0	0	0	0	0	0		2	2		0	0	0	0	0	0	0	0	0	0	0
3	2	2009	1	0	0	0	0	0	0	0	0	0	0	0		2	2		0	0	0	0	0	0	0	0	0	0	0
3	2	2009	1	0	0	0	0	0	0	0	0	0	0	0		2	2		0	0	0	0	0	0	0	0	0	0	0
3	2	2009	1	0	0	0	0	0	0	0	0	0	0	0		2	2		0	0	0	0	0	0	0	0	0	0	0
3	2	2009	1	0	0	0	0	0	0	0	0	0	0	0		2	2		0	0	0	0	0	0	0	0	0	0	0
3	2	2009	1	0	0	0	0	0	0	0	0	0	0	0		2	2		0	0	0	0	0	0	0	0	0	0	0
3	2	2009	1	0	0	0	0	0	0	0	0	0	0	0		2	2		0	0	0	0	0	0	0	0	0	0	0
3	2	2009	1	0	0	0	0	0	0	0	0	0	0	0		2	2		0	0	0	0	0	0	0	0	0	0	0
3	2	2009	1	0	0	0	0	0	0	0	0	0	0	0		2	2		0	0	0	0	0	0	0	0	0	0	0
3	2	2009	1	0	0	0	0	0	0	0	0	0	0	0		2	2		0	0	0	0	0	0	0	0	0	0	0
3	2	2009	1	0	0	0	0	0	0	0	0	0	0	0		2	2		0	0	0	0	0	0	0	0	0	0	0
3	2	2009	1	0	0	0	0	0	0	0	0	0	0	0		2	2		0	0	0	0	0	0	0	0	0	0	0
3	2	2009	1	0	0	0	0	0	0	0	0	0	0	0		2	2		0	0	0	0	0	0	0	0	0	0	0
3	2	2009	1	0	0	0	0	0	0	0	0	0	0	0		2	2		0	0	0	0	0	0	0	0	0	0	0
3	2	2009	1	0	0	0	0	0	0	0	0	0	0	0		2	2		0	0	0	0	0	0	0	0	0	0	0
3	2	2009	1	0	0	0	0	0	0	0	0	0	0	0		2	2		0	0	0	0	0	0	0	0	0	0	0
3	2	2009	1	0	0	0	0	0	0	0	0	0	0	0		2	2		0	0	0	0	0	0	0	0	0	0	0
3	2	2009	1	0	0	0	0	0	0	0	0	0	0	0		2	2		0	0	0	0	0	0	0	0	0	0	0
3	2	2009	1	0	0	0	0	0	0	0	0	0	0	0		2	2		0	0	0	0	0	0	0	0	0	0	0
3	2	2009	1	0	0	0	0	0	0	0	0	0	0	0		2	2		0	0	0	0	0	0	0	0	0	0	0
3	2	2009	1	0	0	0	0	0	0	0	0	0	0	0		2	2		0	0	0	0	0	0	0	0	0	0	0
3	2	2009	1	0	0	0	0	0	0	0	0	0	0	0		2	2		0	0	0	0	0	0	0	0	0	0	0
3	2	2009	1	0	0	0	0	0	0	0	0	0	0	0		2	2		0	0	0	0	0	0	0	0	0	0	0
3	2	2009	1	0	0	0	0	0	0	0	0	0	0	0		2	2		0	0	0	0	0	0	0	0	0	0	0
3	2	2009	1	0	0	0	0	0	0	0	0	0	0	0		2	2		0	0	0	0	0	0	0	0	0	0	0
3	2	2009	1	0	0	0	0	0	0	0	0	0	0	0		2	2		0	0	0	0	0	0	0	0	0	0	0
3	2	2009	1	0	0	0	0	0	0	0	0	0	0	0		2	2		0	0	0	0	0	0	0	0	0	0	0
3	2	2009	1	0	0	0	0	0	0	0	0	0	0	0		2	2		0	0	0	0	0	0	0	0	0	0	0
3	2	2009	1	0	0	0	0	0	0	0	0	0	0	0		2	2		0	0	0	0	0	0	0	0	0	0	0
3	2	2009	1	0	0	0	0	0	0	0	0	0	0	0		2	2		0	0	0	0	0	0	0	0	0	0	0
3	2	2009	1	0	0	0	0	0	0	0	0	0	0	0		2	2		0	0	0	0	0	0	0	0	0	0	0
3	2	2009	1	0	0	0	0	0	0	0	0	0	0	0		2	2		0	0	0	0	0	0	0	0	0	0	0
3	2	2009	1	0	0	0	0	0	0	0	0	0	0	0		2	2		0	0	0	0	0	0	0	0	0	0	0
3	2	2009	1	0	0	0	0	0	0	0	0	0	0	0		2	2		0	0	0	0	0	0	0	0	0	0	0
3	2	2009	1	0	0	0	0	0	0	0	0	0	0	0		2	2		0	0	0	0	0	0	0	0	0	0	0
3	2	2009	1	0	0	0	0	0	0	0	0	0	0	0		2	2		0	0	0	0	0	0	0	0	0	0	0
3	2	2009	1	0	0	0	0	0	0	0	0	0	0	0		2	2		0	0	0	0	0	0	0	0	0	0	0
3	2	2009	1	0	0	0	0	0	0	0	0	0	0	0		2	2		0	0	0	0	0	0	0	0	0	0	0
3	3	2009	1	0	1	0	0	0	1	0	0	0	0	2	2	1	2		1	0	1	0	0	0	1	0	0	0	0	2		1				1
3	3	2009	1	1	0	0	0	0	0	0	0	0	0	1	1	1	2		1	1	0	0	0	0	0	0	0	0	0	1	1
3	3	2009	1	0	1	0	0	0	0	0	0	0	0	1	1	1	2		1	0	1	0	0	0	0	0	0	0	0	1		1
3	3	2009	1	0	0	0	0	0	0	0	0	0	0	0		2	2		0	0	0	0	0	0	0	0	0	0	0
3	3	2009	1	0	0	0	0	0	0	0	0	0	0	0		2	2		0	0	0	0	0	0	0	0	0	0	0
3	3	2009	1	0	0	0	0	0	0	0	0	0	0	0		2	2		0	0	0	0	0	0	0	0	0	0	0
3	3	2009	1	0	0	0	0	0	0	0	0	0	0	0		2	2		0	0	0	0	0	0	0	0	0	0	0
3	3	2009	1	0	0	0	0	0	0	0	0	0	0	0		2	2		0	0	0	0	0	0	0	0	0	0	0
3	3	2009	1	0	0	0	0	0	0	0	0	0	0	0		2	2		0	0	0	0	0	0	0	0	0	0	0
3	3	2009	1	0	0	0	0	0	0	0	0	0	0	0		2	2		0	0	0	0	0	0	0	0	0	0	0
3	3	2009	1	0	0	0	0	0	0	0	0	0	0	0		2	2		0	0	0	0	0	0	0	0	0	0	0
3	3	2009	1	0	0	0	0	0	0	0	0	0	0	0		2	2		0	0	0	0	0	0	0	0	0	0	0
3	3	2009	1	0	0	0	0	0	0	0	0	0	0	0		2	2		0	0	0	0	0	0	0	0	0	0	0
3	3	2009	1	0	0	0	0	0	0	0	0	0	0	0		2	2		0	0	0	0	0	0	0	0	0	0	0
3	3	2009	1	0	0	0	0	0	0	0	0	0	0	0		2	2		0	0	0	0	0	0	0	0	0	0	0
3	3	2009	1	0	0	0	0	0	0	0	0	0	0	0		2	2		0	0	0	0	0	0	0	0	0	0	0
3	3	2009	1	0	0	0	0	0	0	0	0	0	0	0		2	2		0	0	0	0	0	0	0	0	0	0	0
3	3	2009	1	0	0	0	0	0	0	0	0	0	0	0		2	2		0	0	0	0	0	0	0	0	0	0	0
3	3	2009	1	0	0	0	0	0	0	0	0	0	0	0		2	2		0	0	0	0	0	0	0	0	0	0	0
3	3	2009	1	0	0	0	0	0	0	0	0	0	0	0		2	2		0	0	0	0	0	0	0	0	0	0	0
3	3	2009	1	0	0	0	0	0	0	0	0	0	0	0		2	2		0	0	0	0	0	0	0	0	0	0	0
3	3	2009	1	0	0	0	0	0	0	0	0	0	0	0		2	2		0	0	0	0	0	0	0	0	0	0	0
3	3	2009	1	0	0	0	0	0	0	0	0	0	0	0		2	2		0	0	0	0	0	0	0	0	0	0	0
3	3	2009	1	0	0	0	0	0	0	0	0	0	0	0		2	2		0	0	0	0	0	0	0	0	0	0	0
3	3	2009	1	0	0	0	0	0	0	0	0	0	0	0		2	2		0	0	0	0	0	0	0	0	0	0	0
3	3	2009	1	0	0	0	0	0	0	0	0	0	0	0		2	2		0	0	0	0	0	0	0	0	0	0	0
3	3	2009	1	0	0	0	0	0	0	0	0	0	0	0		2	2		0	0	0	0	0	0	0	0	0	0	0
3	3	2009	1	0	0	0	0	0	0	0	0	0	0	0		2	2		0	0	0	0	0	0	0	0	0	0	0
3	3	2009	1	0	0	0	0	0	0	0	0	0	0	0		2	2		0	0	0	0	0	0	0	0	0	0	0
3	3	2009	1	0	0	0	0	0	0	0	0	0	0	0		2	2		0	0	0	0	0	0	0	0	0	0	0
3	3	2009	1	0	0	0	0	0	0	0	0	0	0	0		2	2		0	0	0	0	0	0	0	0	0	0	0
3	3	2009	1	0	0	0	0	0	0	0	0	0	0	0		2	2		0	0	0	0	0	0	0	0	0	0	0
3	3	2009	1	0	0	0	0	0	0	0	0	0	0	0		2	2		0	0	0	0	0	0	0	0	0	0	0
3	3	2009	1	0	0	0	0	0	0	0	0	0	0	0		2	2		0	0	0	0	0	0	0	0	0	0	0
3	3	2009	1	0	0	0	0	0	0	0	0	0	0	0		2	2		0	0	0	0	0	0	0	0	0	0	0
3	3	2009	1	0	0	0	0	0	0	0	0	0	0	0		2	2		0	0	0	0	0	0	0	0	0	0	0
3	3	2009	1	0	0	0	0	0	0	0	0	0	0	0		2	2		0	0	0	0	0	0	0	0	0	0	0
3	3	2009	1	0	0	0	0	0	0	0	0	0	0	0		2	2		0	0	0	0	0	0	0	0	0	0	0
3	3	2009	1	0	0	0	0	0	0	0	0	0	0	0		2	2		0	0	0	0	0	0	0	0	0	0	0
3	3	2009	1	0	0	0	0	0	0	0	0	0	0	0		2	2		0	0	0	0	0	0	0	0	0	0	0
3	3	2009	1	0	0	0	0	0	0	0	0	0	0	0		2	2		0	0	0	0	0	0	0	0	0	0	0
3	3	2009	1	0	0	0	0	0	0	0	0	0	0	0		2	2		0	0	0	0	0	0	0	0	0	0	0
3	3	2009	1	0	0	0	0	0	0	0	0	0	0	0		2	2		0	0	0	0	0	0	0	0	0	0	0
3	3	2009	1	0	0	0	0	0	0	0	0	0	0	0		2	2		0	0	0	0	0	0	0	0	0	0	0
3	3	2009	1	0	0	0	0	0	0	0	0	0	0	0		2	2		0	0	0	0	0	0	0	0	0	0	0
3	3	2009	1	0	0	0	0	0	0	0	0	0	0	0		2	2		0	0	0	0	0	0	0	0	0	0	0
3	3	2009	1	0	0	0	0	0	0	0	0	0	0	0		2	2		0	0	0	0	0	0	0	0	0	0	0
3	3	2009	1	0	0	0	0	0	0	0	0	0	0	0		2	2		0	0	0	0	0	0	0	0	0	0	0
3	3	2009	1	0	0	0	0	0	0	0	0	0	0	0		2	2		0	0	0	0	0	0	0	0	0	0	0
3	3	2009	1	0	0	0	0	0	0	0	0	0	0	0		2	2		0	0	0	0	0	0	0	0	0	0	0
3	3	2009	1	0	0	0	0	0	0	0	0	0	0	0		2	2		0	0	0	0	0	0	0	0	0	0	0
3	3	2009	1	0	0	0	0	0	0	0	0	0	0	0		2	2		0	0	0	0	0	0	0	0	0	0	0
3	3	2009	1	0	0	0	0	0	0	0	0	0	0	0		2	2		0	0	0	0	0	0	0	0	0	0	0
3	3	2009	1	0	0	0	0	0	0	0	0	0	0	0		2	2		0	0	0	0	0	0	0	0	0	0	0
3	3	2009	1	0	0	0	0	0	0	0	0	0	0	0		1	2		0	0	0	0	0	0	0	0	0	0	0
3	3	2009	1	0	0	0	0	0	0	0	0	0	0	0		1	2		0	0	0	0	0	0	0	0	0	0	0
3	3	2009	1	0	0	0	0	0	0	0	0	0	0	0		1	2		0	0	0	0	0	0	0	0	0	0	0
3	3	2009	1	0	0	0	0	0	0	0	0	0	0	0		1	2		0	0	0	0	0	0	0	0	0	0	0
3	3	2009	1	0	0	0	0	0	0	0	0	0	0	0		1	2		0	0	0	0	0	0	0	0	0	0	0
3	3	2009	1	0	0	0	0	0	0	0	0	0	0	0		1	2		0	0	0	0	0	0	0	0	0	0	0
3	3	2009	1	0	0	0	0	0	0	0	0	0	0	0		1	2		0	0	0	0	0	0	0	0	0	0	0
3	3	2009	1	0	0	0	0	0	0	0	0	0	0	0		1	2		0	0	0	0	0	0	0	0	0	0	0
3	3	2009	1	0	0	0	0	0	0	0	0	0	0	0		1	2		0	0	0	0	0	0	0	0	0	0	0
3	3	2009	1	0	0	0	0	0	0	0	0	0	0	0		1	2		0	0	0	0	0	0	0	0	0	0	0
3	3	2009	1	0	0	0	0	0	0	0	0	0	0	0		1	2		0	0	0	0	0	0	0	0	0	0	0
3	3	2009	1	0	0	0	0	0	0	0	0	0	0	0		1	2		0	0	0	0	0	0	0	0	0	0	0
3	3	2009	1	0	0	0	0	0	0	0	0	0	0	0		1	2		0	0	0	0	0	0	0	0	0	0	0
3	3	2009	1	0	0	0	0	0	0	0	0	0	0	0		1	2		0	0	0	0	0	0	0	0	0	0	0
3	3	2009	1	0	0	0	0	0	0	0	0	0	0	0		1	2		0	0	0	0	0	0	0	0	0	0	0
3	3	2009	1	0	0	0	0	0	0	0	0	0	0	0		1	2		0	0	0	0	0	0	0	0	0	0	0
3	3	2009	1	0	0	0	0	0	0	0	0	0	0	0		1	2		0	0	0	0	0	0	0	0	0	0	0
3	3	2009	1	0	0	0	0	0	0	0	0	0	0	0		1	2		0	0	0	0	0	0	0	0	0	0	0
3	3	2009	1	0	0	0	0	0	0	0	0	0	0	0		1	2		0	0	0	0	0	0	0	0	0	0	0
3	3	2009	1	0	0	0	0	0	0	0	0	0	0	0		1	2		0	0	0	0	0	0	0	0	0	0	0
3	3	2009	1	0	0	0	0	0	0	0	0	0	0	0		1	2		0	0	0	0	0	0	0	0	0	0	0
3	3	2009	1	0	0	0	0	0	0	0	0	0	0	0		1	2		0	0	0	0	0	0	0	0	0	0	0
3	3	2009	1	0	0	0	0	0	0	0	0	0	0	0		1	2		0	0	0	0	0	0	0	0	0	0	0
3	3	2009	1	0	0	0	0	0	0	0	0	0	0	0		1	2		0	0	0	0	0	0	0	0	0	0	0
3	3	2009	1	0	0	0	0	0	0	0	0	0	0	0		1	2		0	0	0	0	0	0	0	0	0	0	0
3	3	2009	1	0	0	0	0	0	0	0	0	0	0	0		1	2		0	0	0	0	0	0	0	0	0	0	0
3	3	2009	1	0	0	0	0	0	0	0	0	0	0	0		1	2		0	0	0	0	0	0	0	0	0	0	0
3	3	2009	1	0	0	0	0	0	0	0	0	0	0	0		1	2		0	0	0	0	0	0	0	0	0	0	0
3	3	2009	1	0	0	0	0	0	0	0	0	0	0	0		1	2		0	0	0	0	0	0	0	0	0	0	0
3	3	2009	1	0	0	0	0	0	0	0	0	0	0	0		1	2		0	0	0	0	0	0	0	0	0	0	0
3	3	2009	1	0	0	0	0	0	0	0	0	0	0	0		1	2		0	0	0	0	0	0	0	0	0	0	0
3	3	2009	1	0	0	0	0	0	0	0	0	0	0	0		1	2		0	0	0	0	0	0	0	0	0	0	0
3	3	2009	1	0	0	0	0	0	0	0	0	0	0	0		1	2		0	0	0	0	0	0	0	0	0	0	0
3	3	2009	1	0	0	0	0	0	0	0	0	0	0	0		1	2		0	0	0	0	0	0	0	0	0	0	0
3	3	2009	1	0	0	0	0	0	0	0	0	0	0	0		1	2		0	0	0	0	0	0	0	0	0	0	0
3	3	2009	1	0	0	0	0	0	0	0	0	0	0	0		1	2		0	0	0	0	0	0	0	0	0	0	0
3	3	2009	1	0	0	0	0	0	0	0	0	0	0	0		1	2		0	0	0	0	0	0	0	0	0	0	0
3	3	2009	1	0	0	0	0	0	0	0	0	0	0	0		1	2		0	0	0	0	0	0	0	0	0	0	0
3	3	2009	1	0	0	0	0	0	0	0	0	0	0	0		1	2		0	0	0	0	0	0	0	0	0	0	0
3	3	2009	1	0	0	0	0	0	0	0	0	0	0	0		1	2		0	0	0	0	0	0	0	0	0	0	0
3	3	2009	1	0	0	0	0	0	0	0	0	0	0	0		1	2		0	0	0	0	0	0	0	0	0	0	0
3	3	2009	1	0	0	0	0	0	0	0	0	0	0	0		1	2		0	0	0	0	0	0	0	0	0	0	0
3	3	2009	1	0	0	0	0	0	0	0	0	0	0	0		1	2		0	0	0	0	0	0	0	0	0	0	0
3	3	2009	1	0	0	0	0	0	0	0	0	0	0	0		1	2		0	0	0	0	0	0	0	0	0	0	0
3	3	2009	1	0	0	0	0	0	0	0	0	0	0	0		1	2		0	0	0	0	0	0	0	0	0	0	0
3	3	2009	1	0	0	0	0	0	0	0	0	0	0	0		1	2		0	0	0	0	0	0	0	0	0	0	0
3	3	2009	1	0	0	0	0	0	0	0	0	0	0	0		1	2		0	0	0	0	0	0	0	0	0	0	0
3	3	2009	1	0	0	0	0	0	0	0	0	0	0	0		1	2		0	0	0	0	0	0	0	0	0	0	0
3	3	2009	1	0	0	0	0	0	0	0	0	0	0	0		1	2		0	0	0	0	0	0	0	0	0	0	0
3	3	2009	1	0	0	0	0	0	0	0	0	0	0	0		1	2		0	0	0	0	0	0	0	0	0	0	0
3	3	2009	1	0	0	0	0	0	0	0	0	0	0	0		1	2		0	0	0	0	0	0	0	0	0	0	0
3	3	2009	1	0	0	0	0	0	0	0	0	0	0	0		1	2		0	0	0	0	0	0	0	0	0	0	0
3	3	2009	1	0	0	0	0	0	0	0	0	0	0	0		1	2		0	0	0	0	0	0	0	0	0	0	0
3	3	2009	1	0	0	0	0	0	0	0	0	0	0	0		1	2		0	0	0	0	0	0	0	0	0	0	0
3	3	2009	1	0	0	0	0	0	0	0	0	0	0	0		1	2		0	0	0	0	0	0	0	0	0	0	0
3	3	2009	1	0	0	0	0	0	0	0	0	0	0	0		1	2		0	0	0	0	0	0	0	0	0	0	0
3	3	2009	1	0	0	0	0	0	0	0	0	0	0	0		1	2		0	0	0	0	0	0	0	0	0	0	0
